# Supplementary material for: A novel genetic circuitry governing hypoxic metabolic flexibility, commensalism and virulence in the fungal pathogen Candida albicans
Source: PLoS Pathog. 2019 Dec 6;15(12):e1007823. doi: 10.1371/journal.ppat.1007823 (PMC6919631; doi:10.1371/journal.ppat.1007823)
Supplement: S1 Table — (XLSX) [file ppat.1007823.s004.xlsx]

## Sheet: Legend
Table S1
Raw data of the genetic survey for transcriptional regulators required for metabolic adaptation in different carbon sources under low oxygen concentration

## Sheet: Table S1
	Strain.ID	orf19 ID	Name	S.cerevisiae homolog	Growth under normoxia			Growth under hypoxia
					Glucose	Sucrose	Glycerol	Glucose	Sucrose	Glycerol			Enhancement	+++
	HZY2-2	orf19.1032	SKO1	YNL167C	++	++	++	++	++	++			wt growth	++
	DSY4165-B	orf19.1150			++	++	++	++	++	++			Growth reduction	+	Growth reduction by 1-5 %
	DSY4181	orf19.1168	ZCF3		++	++	++	++	++	++				-	Growth reduction by 6-20 %
	SFY45	orf19.1187	CPH2	YOR032C	++	++	++	++	++	++				--	Growth reduction by 21-40 %
	SFY5	orf19.1253	PHO4	YFR034C	++	+	++	++	++	++				---	Absence of growth
	SFY11	orf19.1275	GAT1	YFL021W	++	++	++	++	++	++
	SFY19	orf19.1314			++	++	++	++	++	++
	DSY3297	orf19.1499	CTF1		++	++	++	++	++	++
	SFY4	orf19.1577		YMR136W	++	++	++	++	++	++
	CMY8-1	orf19.1697		YOR091W	++	++	++	++	++	++
	CMY8-2	orf19.1698		YNL094W	++	++	++	++	++	++
	SFY46-2	orf19.1759	PHO23	YNL097C	++	++	++	++	++	++
	SFY42	orf19.1971	TRY3		++	++	++	++	++	++
	HL11-1	orf19.2012	NOT3	YIL038C	++	++	++	++	++	++
	SFY44	orf19.2097		YLR032W	++	++	++	++	++	++
	CJN863	orf19.2331	ADA2	YDR448W	++	++	++	++	++	++
	DSY4169-A	orf19.2545	DOT6	YER088C	++	++	++	++	++	++
	GKO341	orf19.2646	ZCF13		++	++	++	++	++	++
	CJN911	orf19.2674			++	++	++	++	++	++
	SFY47-2	orf19.2695	UBR1	YGR184C	++	++	++	++	++	++
	DSY4180	orf19.2747	RGT1	YKL038W	++	++	++	++	++	++
	GKO612	orf19.2808	ZCF16	YJL089W	++	++	++	++	++	++
	SFY43	orf19.2842	GZF3	YJL110C	++	++	++	++	++	++
	DSY4162	orf19.2969	RAD16		+	+	+	++	+	++
	GKO844	orf19.3012	ARO80	YDR421W	++	+	++	++	+	++
	SFY21	orf19.3018	SPP1		+++	+++	+++	++	++	++
	HK81-2	orf19.3035	SNF2		++	++	++	++	++	++
	GKO663	orf19.3190	HAL9		++	++	++	++	++	++
	DSY4175-A	orf19.3201	MTLA1	YCR097W	++	++	++	+	+	+
	SFY33-2	orf19.3281		YER051W	++	++	++	++	+	++
	SFY36	orf19.3407	RAD18	YCR066W	++	++	++	++	+	++
	SFY9	orf19.3969	SFL2	YGR249W	++	++	++	+	+	+
	CMY12-1	orf19.4000	GRF10	YDL106C	++	++	++	++	++	++
	SFY7-2	orf19.4062	TRY2		++	++	++	++	++	++
	RLS19	orf19.4225	LEU3	YLR451W	++	++	++	++	++	++
	CJN805	orf19.4776	LYS143	YDR034C	++	++	++	++	++	++
	RLS46	orf19.4844			+	+	+	+	+	+
	DSY4203-c	orf19.4869	SFU1		+	+	+	+	+	+
	JMR087	orf19.4880			++	++	++	+	++	+
	AI54-1	orf19.4884	WOR1		++	++	++	++	+	++
	DSY3422-8	orf19.4961	STP2	YHR006W	+	++	+	+	+	+
	DSY4179-A	orf19.5097	CAT8	YMR280C	+	+	++	+	+	+
	SFY3-2	orf19.5175		YIL030C	++	++	++	++	++	++
	DSY4178-B	orf19.5251	ZCF30		++	++	++	++	++	++
	SFY39-2	orf19.5312	MET4	YNL103W	++	++	++	++	++	++
	RLS131	orf19.5343	ASH1		+	+	+	+	+	+
	SFY14-2	orf19.5389	FKH2	YIL131C	++	++	++	++	++	++
	SFY18-2	orf19.5498	EFH1		++	++	++	++	++	++
	CJN528	orf19.5548	LYS14		++	++	++	++	++	++
	DSY4171	orf19.5617		YPL181W	++	++	++	++	++	++
	SFY6	orf19.5651		YJR119C	++	++	++	++	++	++
	SFY2-2	orf19.5660		YDR265W	+	+	+	+	+	+
	CMY10-1	orf19.5676		YLR427W	++	++	++	++	++	++
	SFY37-2	orf19.5722		YDR026C	++	++	++	++	++	++
	JC25-6	orf19.5871	SNF5		++	++	++	++	---	---
	SFY16	orf19.59	REI1	YBR267W	++	++	++	++	++	++
	DSY3452-17	orf19.5953	SFP1	YLR403W	+	+	+	+	+	+
	CMY6-1	orf19.5992	WOR2		++	++	++	++	++	++
	RLS48	orf19.6203	PUT3	YKL015W	++	++	++	++	++	++
	DSY4176-A	orf19.6514	CUP9	YGL096W	++	++	++	++	++	++
	DSY4173-A	orf19.6645	HMO1	YDR174W	++	++	++	++	++	++
	DSY4163-B	orf19.6753		YBR062C	++	++	++	++	++	++
	RLS106	orf19.6801	RPD31	YNL330C	++	++	++	++	++	++
	SFY10	orf19.6824	TRY6		++	++	++	++	++	++
	GKO570	orf19.6850		YDR255C	++	++	++	++	++	++
	CMY4-1	orf19.6861			++	++	++	++	+	++
	CMY2	orf19.6874			++	++	++	++	++	++
	GR08-2	orf19.6904	GCN3	YKR026C	+	+	+	+	+	+
	CJN1007	orf19.7025	MCM1	YMR043W	++	++	++	++	++	++
	GKO692	orf19.7381	AHR1		+++	++	++	+++	+++	++
	SFY15	orf19.7385		YPL054W	++	++	++	++	++	++
	DSY4183-B	orf19.7397		YPR022C	++	++	++	++	++	++
	DSY3332	orf19.7523	MKC1	YHR030C	++	++	++	++	++	++
	SFY1-2	orf19.7547		YDR313C	++	++	++	++	++	++
	GKO830	orf19.7583	ZCF39		++	++	++	++	++	++
	GG91-5	orf19.7612	CTM1	YHR109W	+	+	+	+	+	+
	DSY4182	orf19.7849			++	++	++	++	++	++
	SFY8	orf19.8085			++	++	++	++	++	++
	HZY5-2	orf19.861	CAP4		++	++	++	+	+	+
	CJN817	orf19.909	STP4	YLR375W	++	++	++	++	++	++
	CJN609	orf19.1007			++	++	++	++	++	++
	DSY3429-1	orf19.1035	WAR1		++	++	++	++	++	++
	HZY66	orf19.1069	RPN4		++	++	++	++	++	++
	CJN523	orf19.1135	CAS1		++	++	++	++	++	++
	CJN866	orf19.1178			++	++	++	++	++	++
	JI41-8	orf19.1217			++	++	++	++	++	++
	RLS22	orf19.1219			++	++	++	++	++	++
	CJN592	orf19.1255	ZCF5		++	++	++	++	++	++
	RLS21	orf19.1259			++	++	++	++	++	++
	DSY3233	orf19.1358	GCN4		++	++	++	++	++	++
	JG54-7	orf19.1464	BMT5		++	++	++	++	++	++
	JMR090	orf19.1476			++	++	++	++	++	++
	CJN922	orf19.1496			++	++	++	++	++	++
	CJN582	orf19.1497	ZCF6		++	++	++	++	++	++
	GA15-2	orf19.1533			++	++	++	++	++	++
	N538-1	orf19.1543	OPI1		++	++	++	++	++	++
	CJN941	orf19.1565			++	++	++	++	++	++
	RLS20	orf19.1576			++	++	++	++	++	++
	CJN932	orf19.1589			++	++	++	++	++	++
	CJN608	orf19.1623	CAP1		++	++	++	++	++	++
	DSY1762	orf19.166	ASG1		++	++	++	++	++	++
	JMR049	orf19.1685	ZCF7		++	++	++	+	+	+
	CJN958	orf19.1693	CAS4		++	++	++	++	++	++
	DSY3447-11	orf19.1718	ZCF8		++	++	++	++	++	++
	CJN966	orf19.1729			++	++	++	++	++	++
	DSY3440-17	orf19.173			++	++	++	++	++	++
	CJN815	orf19.1757			++	++	++	++	++	++
	DSY3333	orf19.1813	FLC2		++	++	++	++	++	++
	CJN975	orf19.1826	MDM34		++	++	++	++	++	++
	JMR053	orf19.1973	HAP5		++	++	++	++	++	++
	CJN831	orf19.2054	FGR15		++	++	++	++	++	++
	SFY25	orf19.2087	SAS2		++	++	++	++	++	++
	JMR091	orf19.2105			++	++	++	++	++	++
	DSY3430-3	orf19.217			++	++	++	++	++	++
	DSY3326	orf19.2217			++	++	++	++	++	++
	CJN854	orf19.2260			++	++	++	++	++	++
	CJN799	orf19.2280	ZCF10		++	++	++	++	++	++
	CJN864	orf19.2315			++	++	++	++	++	++
	CJN811	orf19.2356	CRZ2		++	++	++	++	++	++
	CJN872	orf19.2393			++	++	++	++	++	++
	DSY3336-4	orf19.2395	IME2		++	++	++	++	++	++
	CJN874	orf19.2399			++	++	++	++	++	++
	DSY3411-2	orf19.2423	ZCF11		++	++	++	++	++	++
	CJN878	orf19.2458			++	++	++	++	++	++
	DSY3439-3	orf19.2540	SAS3		++	++	++	++	++	++
	DSY3412-2	orf19.255	ZCF1		++	++	++	++	++	++
	SFY27	orf19.259			++	++	++	++	++	++
	CJN908	orf19.2612			++	++	++	++	++	++
	FB35-1	orf19.2623	ECM22		++	++	++	++	++	++
	DSY2892	orf19.2647	ZCF14		++	++	++	++	++	++
	JMR074	orf19.2730			++	++	++	++	++	++
	CJN494	orf19.2745	UME7		++	++	++	++	++	++
	DSY3426-2	orf19.2748	ARG83		++	++	++	++	++	++
	RLS16	orf19.2752	ADR1		++	++	++	++	++	++
	DSY3413-2	orf19.2753	ZCF15		++	++	++	++	++	++
	SFY30	orf19.2823	RFG1		++	++	++	++	++	++
	J120-1	orf19.2963			++	++	++	++	++	++
	CJN885	orf19.3088			++	++	++	++	++	++
	CJN517	orf19.3127	CZF1		++	++	++	++	++	++
	CJN403	orf19.3187	ZNC1		++	++	++	++	++	++
	DSY2906	orf19.3188	TAC1		++	++	++	++	++	++
	CJN926	orf19.3193	FCR3		++	++	++	++	++	++
	DSY3414-1	orf19.3252	DAL81		++	++	++	++	++	++
	HZY62	orf19.3294	MBF1		++	++	++	++	++	++
	CJN928	orf19.33			++	++	++	++	++	++
	CJN593	orf19.3305	ZCF17		++	++	++	++	++	++
	CJN531	orf19.3308	STB5		++	++	++	++	++	++
	CJN943	orf19.3405	ZCF18		++	++	++	++	++	++
	RLS50	orf19.3434	TRY5		++	++	++	++	++	++
	HN71-5	orf19.3505	SLM2		+	+	+	+	+	+
	CJN979	orf19.3683	AGE3		+	+	+	+	+	+
	CJN983	orf19.3753	SEF1		++	++	++	++	++	++
	CJN256	orf19.3809	BAS1		++	++	++	++	++	++
	CJN993	orf19.3833			++	++	++	++	++	++
	RLS28	orf19.3865	RFX1		++	++	++	++	++	++
	RLS7	orf19.3876	ZCF19		++	++	++	++	++	++
	JMR038	orf19.391	UPC2		++	++	++	+	++	+
	CJN299	orf19.3928			++	++	++	++	++	++
	CJN411	orf19.3986	PPR1		++	++	++	++	++	++
	DSY4164	orf19.4056	BRG1		++	++	++	++	++	++
	CJN396	orf19.4125			++	++	++	++	++	++
	DSY3415-1	orf19.4145	ZCF20		++	++	++	++	++	++
	DSY3416-1	orf19.4166	ZCF21		++	++	++	++	++	++
	RLS18	orf19.4225	LEU3		++	++	++	++	++	++
	DSY3418-1	orf19.4288	CTA7		++	++	++	++	++	++
	CJN434	orf19.4318	MIG1		++	++	++	++	++	++
	CJN305	orf19.4433	CPH1		++	++	++	++	++	++
	DSY3419-1	orf19.4450	ZCF23		++	++	++	++	++	++
	HM72-4	orf19.4524	ZCF24		++	++	++	++	++	++
	DSY4185	orf19.4545	SWI4		++	++	++	++	++	++
	CJN518	orf19.4568	ZCF25		++	++	++	++	++	++
	CJN598	orf19.4573	ZCF26		++	++	++	++	++	++
	HZY61	orf19.4649	ZCF27		++	++	++	++	++	++
	BRY429	orf19.4662	RLM1		++	++	++	++	++	++
	CJN432	orf19.467			++	++	++	++	++	++
	JMR089	orf19.4722			++	++	++	++	++	++
	CJN334	orf19.4752	MSN4		++	++	++	++	++	++
	HZY28	orf19.4766	ARG81		++	++	++	++	++	++
	CJN803	orf19.4767	ZCF28		++	++	++	++	++	++
	JMR044	orf19.4775	CTA8		++	++	++	++	++	++
	CJN807	orf19.4778	LYS142		++	++	++	++	++	++
	JMR040	orf19.4813	GUA1		++	++	++	++	++	++
	SFY32	orf19.4941	TYE7		++	++	++	+	+	+
	CJN393	orf19.4972			++	++	++	++	++	++
	DSY3330	orf19.4979	KNS1		++	++	++	++	++	++
	RLS11	orf19.4998	ROB1		++	++	++	++	++	++
	CJN427	orf19.5026			++	++	++	++	++	++
	JJH11	orf19.5107	NOT5		++	++	++	++	++	++
	HZY34	orf19.5133	ZCF29		++	++	++	++	++	++
	CJN348	orf19.5326			++	++	++	++	++	++
	G376-1	orf19.5334			++	++	++	++	++	++
	CJN801	orf19.5338	GAL4		++	++	++	++	++	++
	GE92-1	orf19.5377	HOS2		++	++	++	++	++	++
	SFY14	orf19.5389	FKH2		++	++	++	++	++	++
	EO34-5	orf19.5438			++	++	++	++	++	++
	HM74-2	orf19.5445	GLO3		++	++	++	++	++	++
	L213-4	orf19.5552			++	++	++	++	++	++
	B518-2	orf19.5580	TEL1		++	++	++	++	++	++
	JMR035	orf19.5666			++	++	++	++	++	++
	CJN506	orf19.5729	FGR17		++	++	++	++	++	++
	I439-11	orf19.5734	POP2		++	++	++	++	++	++
	DSY3329-3	orf19.5759	SNQ2		++	++	++	++	++	++
	HZY14	orf19.5848			++	++	++	++	++	++
	HZY60	orf19.5849	CWT1		++	++	++	++	++	++
	RLS76	orf19.5855	MBP1		++	++	++	++	++	++
	CJN308	orf19.5908	TEC1		++	++	++	++	++	++
	JMR062	orf19.5910			++	++	++	++	++	++
	HZY35	orf19.5917	STP3		++	++	++	++	++	++
	DSY3420-1	orf19.5924	ZCF31		++	++	++	++	++	++
	DSY3421-2	orf19.5940	ZCF32		++	++	++	++	++	++
	HZY20	orf19.5975	TRY4		++	++	++	++	++	++
	RLS44	orf19.6011	SIN3		++	++	++	++	++	++
	GR52-1	orf19.6038	UGA32		++	++	++	++	++	++
	SFY26	orf19.610	EFG1		++	++	++	++	++	++
	HZY7-1	orf19.6102	RCA1		++	++	++	++	++	++
	JMR069	orf19.6109	TUP1		++	++	++	++	++	++
	DSY3410-2	orf19.6121	MNL1		++	++	++	++	++	++
	DSY3423-6	orf19.6124	ACE2		++	++	++	++	++	-
	CJN548	orf19.6182	ZCF34		++	++	++	++	++	++
	DSY3367	orf19.6227			++	++	++	++	++	++
	HZY15	orf19.6407			++	++	++	++	++	++
	HQ12-3	orf19.6414			++	++	++	++	++	++
	SFY24	orf19.6506			++	++	++	++	++	++
	DSY3331	orf19.6626			++	++	++	++	++	++
	CJN419	orf19.668			++	++	++	++	++	++
	RLS42	orf19.6712			++	++	++	++	++	++
	RLS82	orf19.6713			++	++	++	++	++	++
	ID27-1	orf19.6754			++	++	++	++	++	++
	CJN997	orf19.6781	ZFU2		++	++	++	++	++	++
	DSY2989	orf19.681	HAP43		++	++	++	++	++	++
	DSY3298	orf19.6817	FCR1		++	++	++	++	++	++
	CJN1001	orf19.6845			++	++	++	++	++	++
	RLS106	orf19.6801	RPD31		++	++	++	++	++	++
	GKO570	orf19.6850			++	++	++	++	++	++
	I093-5	orf19.6888			++	++	++	++	++	++
	RLS36	orf19.6923			++	++	++	++	++	++
	HZY23	orf19.6985	TEA1		++	++	++	++	++	++
	JMR092	orf19.7017	YOX1		++	++	++	++	++	++
	DSY3438-2	orf19.702			++	++	++	++	++	++
	RLS135	orf19.7098			++	++	++	++	++	++
	CJN322	orf19.715			++	++	++	++	++	++
	CJN459	orf19.723	BCR1		++	++	++	++	++	++
	CJN267	orf19.7247	RIM101		++	++	++	++	++	++
	CJN571	orf19.7317	UGA33		++	++	++	++	++	++
	RLS3	orf19.7319	SUC1		++	++	++	++	++	++
	CJN442	orf19.7359	CRZ1		++	++	++	++	++	++
	ceme-11	orf19.736	SRB8		++	++	++	++	++	++
	RLS26	orf19.7371	ZCF35		++	++	++	++	++	++
	DSY3437-5	orf19.7372	MRR1		++	++	++	++	++	++
	RLS1	orf19.7374	CTA4		++	++	++	++	++	++
	CJN491	orf19.7518	ZCF38		++	++	++	++	++	++
	CJN511	orf19.757			++	++	++	++	++	++
	RLS133	orf19.7622	SPT3		++	++	++	++	++	++
	ceme-13	orf19.794	SSN3		++	++	++	++	++	++
	CJN856	orf19.798	TAF14		++	++	++	++	++	++
	SFY23	orf19.878	NBN1		++	++	++	++	++	++
	CJN857	orf19.889	THI20		++	++	++	++	++	++
	G555-2	orf19.971	SKN7		++	++	++	++	++	++
	CJN1003	orf19.685	YHM1		-	-	-	-	--	-
