# Supplementary material for: A novel genetic circuitry governing hypoxic metabolic flexibility, commensalism and virulence in the fungal pathogen Candida albicans
Source: PLoS Pathog. 2019 Dec 6;15(12):e1007823. doi: 10.1371/journal.ppat.1007823 (PMC6919631; doi:10.1371/journal.ppat.1007823)
Supplement: S2 Table — (XLSX) [file ppat.1007823.s005.xlsx]

## Sheet: Legend
Table S2
Transcripts differentially expressed in snf5 mutant using a 1.5-fold change cut-off and a 5% false discovery rate.

## Sheet: Table S2
Systematic	Common	snf5		WT		WT/snf5	Description	GO biological process	GO molecular function	GO cellular component
		Normalized	t-test P-value	Normalized	t-test P-value
orf19.3982	MAL32	0.20135	0.529054	24.2118	2.20297e-05	120.248	Maltase; induced during growth on sucrose; transcription is induced in response to alpha pheromone in SpiderM medium	GO:0005987 sucrose catabolic process |	GO:0032450 maltase activity |	GO:0005622 intracellular |
orf19.3981	MAL31	0.315331	0.492923	7.63078	0.0257174	24.1993	Putative high-affinity maltose transporter; transcript is upregulated in clinical isolates from HIV+ patients with oral candidiasis; alkaline induced; Spider biofilm induced	GO:0000017 alpha-glucoside transport | GO:0008643 carbohydrate transport |	GO:0005352 alpha-glucoside | GO:0005364 maltose | GO:0051119 sugar transmembrane transporter activity |	GO:0005624 membrane fraction | GO:0016020 membrane |
orf19.6229	CAT1	0.273898	0.491911	4.77014	0.00377071	17.4157	Catalase; role in resistance to oxidative stress, neutrophils, peroxide; role in murine systemic virulence; regulated by iron, ciclopirox olamine, fluconazole, growth, carbon source, pH, Rim101p, Ssn6p, Hog1p, farnesol, core stress response	GO:0009405 pathogenesis | GO:0006800 oxygen and reactive oxygen species metabolic process | GO:0042744 hydrogen peroxide catabolic process | GO:0051701 interaction with host | GO:0030448 hyphal growth | GO:0042542 response to hydrogen peroxide | GO:0001315 age-dependent response to reactive oxygen species |	GO:0004096 catalase activity | GO:0005515 protein binding |	GO:0009277 fungal-type cell wall | GO:0005759 mitochondrial matrix | GO:0005782 peroxisomal matrix |
orf19.638	FDH1	0.682016	0.218839	7.19812	0.0298409	10.5542	Formate dehydrogenase; oxidizes formate to CO2; Mig1 regulated; induced by macrophages; fluconazole-repressed; repressed by Efg1 in yeast, not hyphal conditions; stationary phase enriched; rat catheter and Spider biofilm induced	GO:0006546 glycine catabolic process | GO:0015942 formate metabolic process | GO:0006735 NADH regeneration | GO:0042183 formate catabolic process |	GO:0008863 formate dehydrogenase activity |	GO:0005829 cytosol |
orf19.3733	IDP2	0.726685	0.517764	6.19941	0.0218361	8.53109	Putative isocitrate dehydrogenase; expression is regulated upon white-opaque switching; shows colony morphology-related gene regulation by Ssn6p; protein detected by mass spec in exponential and stationary phase cultures	GO:0006537 glutamate biosynthetic process | GO:0006102 isocitrate metabolic process |	GO:0004450 isocitrate dehydrogenase (NADP+) activity |	GO:0005829 cytosol |
orf19.1847	ARO10	0.323931	0.498312	2.73519	0.00127962	8.44376	Aromatic decarboxylase of the Ehrlich fusel oil pathway of aromatic alcohol biosynthesis; pH-regulated (alkaline downregulated); protein abundance is affected by URA3 expression in the CAI-4 strain background	GO:0000949 aromatic amino acid family catabolic process to alcohol via Ehrlich pathway | GO:0000951 methionine catabolic process to 3-methylthiopropanol | GO:0000950 branched chain family amino acid catabolic process to alcohol via Ehrlich pathway | GO:0006569 tryptophan catabolic process | GO:0006552 leucine catabolic process | GO:0006559 L-phenylalanine catabolic process |	GO:0016831 carboxy-lyase activity | GO:0050177 phenylpyruvate decarboxylase activity |	GO:0005737 cytoplasm |
orf19.3160	HSP12	0.447008	0.645558	3.73711	0.000535078	8.36027	Heat-shock protein; induced upon osmotic/oxidative/cadmium stress, fluphenazine treatment, low iron, CDR1 and CDR2 overexpression, or ssn6 or ssk1 homozygous null mutation; repressed by Hog1p, flucytosine, elevated CO2	GO:0006950 response to stress | GO:0042026 protein refolding | GO:0006979 response to oxidative stress | GO:0009408 response to heat | GO:0006972 hyperosmotic response | GO:0007155 cell adhesion |
orf19.4216		0.478608	0.655655	3.68818	0.00790478	7.70606	Predicted ORF in Assemblies 19, 20 and 21; decreased expression in hyphae compared to yeast-form cells; transcription is increased in populations of cells exposed to fluconazole over multiple generations	GO:0042026 protein refolding | GO:0006979 response to oxidative stress | GO:0009408 response to heat | GO:0006972 hyperosmotic response | GO:0007155 cell adhesion |		GO:0001950 plasma membrane enriched fraction | GO:0005634 nucleus | GO:0005737 cytoplasm | GO:0005886 plasma membrane |
orf19.3419	MAE1	1.02897	0.950299	6.55895	0.0481882	6.37431	Malic enzyme, mitochondrial; transcription regulated by Mig1p and Tup1p; shows colony morphology-related gene regulation by Ssn6p	GO:0006520 cellular amino acid metabolic process | GO:0006090 pyruvate metabolic process |	GO:0004470 malic enzyme activity | GO:0016619 malate dehydrogenase (oxaloacetate-decarboxylating) activity |	GO:0005739 mitochondrion |
orf19.2020	HGT6	2.4599	0.312827	14.2939	0.0414649	5.81079	Putative glucose transporter of major facilitator superfamily; 20 members of C. albicans glucose transporter family; 12 probable membrane-spanning segments; core stress response, fluconazole-induced; expressed in rich medium with 2% glucose	GO:0015758 glucose transport | GO:0008643 carbohydrate transport |	GO:0005355 glucose transmembrane transporter activity | GO:0015578 mannose transmembrane transporter activity | GO:0005353 fructose transmembrane transporter activity | GO:0015146 pentose transmembrane transporter activity | GO:0051119 sugar transmembrane transporter activity |	GO:0005887 integral to plasma membrane | GO:0005624 membrane fraction | GO:0001950 plasma membrane enriched fraction | GO:0005739 mitochondrion | GO:0016020 membrane | GO:0005886 plasma membrane |
orf19.7437		0.370024	0.0619854	1.80316	0.0169681	4.87309	Predicted ORF in Assemblies 19, 20 and 21
orf19.449		0.591941	0.343252	2.77581	0.0351291	4.68933	Putative phosphatidyl synthase; stationary phase enriched protein; transcript repressed by yeast-hypha switch; Hap43-repressed; rat catheter, Spider and flow model biofilm induced			GO:0005739 mitochondrion |
orf19.682		0.605977	0.615238	2.81887	0.0337777	4.65178	Predicted mucin-like protein; ketoconazole-induced; fluconazole-repressed; induced in cyr1 mutant; colony morphology-related gene regulation by Ssn6; flow model biofilm induced; Spider biofilm induced
orf19.734	GLK1	0.853034	0.900101	3.56834	0.00183053	4.18311	Putative glucokinase; transcription is regulated upon yeast-hyphal switch; transcriptionally regulated by Efg1p; fluconazole-induced; induced in core stress response; shows colony morphology-related gene regulation by Ssn6p	GO:0006096 glycolysis | GO:0006013 mannose metabolic process | GO:0046323 glucose import |	GO:0004340 glucokinase activity |	GO:0005829 cytosol | GO:0001950 plasma membrane enriched fraction |
orf19.4539		0.70451	0.472119	2.81704	0.0448939	3.99859	Predicted ORF in Assemblies 19, 20 and 21	GO:0007264 small GTPase mediated signal transduction |	GO:0004871 signal transducer activity | GO:0005094 Rho GDP-dissociation inhibitor activity |	GO:0005829 cytosol |
orf19.4918		0.785833	0.49926	2.94053	0.00131831	3.74192	Predicted ORF in Assemblies 19, 20 and 21
orf19.3684	SPS19	0.859007	0.224466	3.1364	0.0159306	3.6512	Predicted ORF in Assemblies 19, 20 and 21	GO:0030437 ascospore formation | GO:0009062 fatty acid catabolic process |	GO:0008670 2,4-dienoyl-CoA reductase (NADPH) activity |	GO:0005782 peroxisomal matrix |
orf19.2344	ASR1	0.667577	0.409866	2.28442	0.00113837	3.42195	Protein described as similar to heat shock proteins; transcription regulated by cAMP, osmotic stress, ciclopirox olamine, ketoconazole; negatively regulated by Cyr1p, Ras1p; shows colony morphology-related gene regulation by Ssn6p
orf19.846		1.01263	0.965451	3.16753	0.00336068	3.12803	Predicted ORF in Assemblies 19, 20 and 21; transcriptionally activated by Mnl1p under weak acid stress	GO:0006508 proteolysis |		GO:0005737 cytoplasm |
orf19.6116	GLK4	0.578265	0.57374	1.79627	0.0216065	3.10632	Putative glucokinase; decreased expression in hyphae compared to yeast-form cells
orf19.5640	PEX5	0.516312	0.355167	1.45795	0.029432	2.82378	Protein of the Pex5p family; required for PTS1-mediated peroxisomal protein import, fatty acid beta-oxidation; similar to S. cerevisiae Pas10p peroxisomal targeting receptor; macrophage/pseudohyphal-repressed	GO:0006625 protein targeting to peroxisome | GO:0006635 fatty acid beta-oxidation | GO:0016558 protein import into peroxisome matrix | GO:0016560 protein import into peroxisome matrix, docking |	GO:0005052 peroxisome matrix targeting signal-1 binding | GO:0030674 protein binding, bridging |	GO:0005829 cytosol | GO:0005778 peroxisomal membrane |
orf19.2173	MAF1	0.891768	0.674365	2.38761	0.017165	2.67739	Protein described as affecting nucleocytoplasmic transport and synthesis of RNA Polymerase III; decreased expression in hyphae compared to yeast-form cells; caspofungin repressed	GO:0016480 negative regulation of transcription from RNA polymerase III promoter |	GO:0016564 transcription repressor activity |	GO:0005634 nucleus |
orf19.5022		0.926982	0.90556	2.31035	0.0107335	2.49233	Predicted ORF in Assemblies 19, 20 and 21	GO:0006828 manganese ion transport |	GO:0005384 manganese ion transmembrane transporter activity |	GO:0000324 fungal-type vacuole | GO:0005886 plasma membrane | GO:0005739 mitochondrion | GO:0016023 cytoplasmic membrane-bounded vesicle |
orf19.7131		0.901144	0.772907	2.13831	0.0460531	2.37289	Butyrobetaine dioxygenase, the fourth enzyme of the carnitine biosynthesis pathway	GO:0045329 carnitine biosynthetic process |	GO:0008336 gamma-butyrobetaine dioxygenase activity |	GO:0005739 mitochondrion |
orf19.4894		0.620101	0.424218	1.45838	0.0417688	2.35184	Protein of unknown function, has similarity to S. cerevisiae Yer010cp, which is a protein of unknown function belonging to the prokaryotic RraA family; decreased transcription is observed upon benomyl treatment
orf19.3359	ARP8	0.898158	0.388936	2.10047	0.0444882	2.33864	Predicted ORF in Assemblies 19, 20 and 21; mutation confers hypersensitivity to toxic ergosterol analog, and to amphotericin B	GO:0042493 response to drug | GO:0006338 chromatin remodeling | GO:0006974 response to DNA damage stimulus | GO:0006312 mitotic recombination |	GO:0043140 ATP-dependent 3'-5' DNA helicase activity |	GO:0031011 Ino80 complex |
orf19.2626	RGD2	0.668341	0.0669128	1.53238	0.00564102	2.29282	Putative GTPase activating protein; fungal-specific (no human or murine homolog); merged with orf19.729.1 in Assembly 20
orf19.7500	PXA1	0.690501	0.628363	1.55657	0.00158587	2.25426	Putative peroxisomal, half-size adrenoleukodystrophy protein (ALD or ALDp) subfamily ABC family transporter	GO:0006810 transport | GO:0015908 fatty acid transport |	GO:0042626 ATPase activity, coupled to transmembrane movement of substances | GO:0005524 ATP binding |	GO:0016021 integral to membrane | GO:0005779 integral to peroxisomal membrane |
orf19.7680	CTA26	0.634426	0.167139	1.4136	0.0171152	2.22816	Putative transcriptional activator; downregulated by Efg1p; transcription is upregulated in an RHE model of oral candidiasis; member of a family of telomere-proximal genes	GO:0045893 positive regulation of transcription, DNA-dependent |	GO:0016563 transcription activator activity |
orf19.2959.1		1.15304	0.731958	2.54649	0.00689804	2.20851	ORF Predicted by Annotation Working Group	GO:0006812 cation transport |		GO:0005886 plasma membrane |
orf19.6550		0.877625	0.13051	1.92657	0.00885792	2.19521	Predicted ORF in Assemblies 19, 20 and 21			GO:0005741 mitochondrial outer membrane |
orf19.5763		0.982178	0.924232	2.11198	0.0328199	2.1503	Predicted ORF in Assemblies 19, 20 and 21	GO:0009062 fatty acid catabolic process |	GO:0008670 2,4-dienoyl-CoA reductase (NADPH) activity |	GO:0005782 peroxisomal matrix |
orf19.1349		0.876281	0.0474758	1.80987	0.00479738	2.0654	Predicted ORF in Assemblies 19, 20 and 21; possibly spurious ORF (Annotation Working Group prediction)
orf19.1381		0.934693	0.868069	1.92647	0.0158017	2.06108	Predicted ORF in Assemblies 19, 20 and 21	GO:0006897 endocytosis | GO:0007015 actin filament organization |		GO:0005938 cell cortex |
orf19.2223		0.851318	0.744093	1.73422	0.0199975	2.0371	Predicted ORF from Assembly 19; removed from Assembly 20
orf19.6706	GYP7	0.689921	0.579462	1.40419	0.0128595	2.03529	Predicted ORF in Assemblies 19, 20 and 21; similar to S. cerevisiae Gyp7p (GTPase-activating protein for Ypt1p); caspofungin-induced	GO:0016192 vesicle-mediated transport |	GO:0005097 Rab GTPase activator activity |	GO:0005737 cytoplasm |
orf19.2655	BUB3	0.9919	0.982383	2.00126	0.0130813	2.0176	Protein similar to S. cerevisiae Bub3p, which is a kinetochore checkpoint component; induced under hydroxyurea treatment	GO:0007094 mitotic cell cycle spindle assembly checkpoint |		GO:0033597 mitotic checkpoint complex | GO:0000778 condensed nuclear chromosome kinetochore |
orf19.2870		0.942214	0.8426	1.89245	0.0336605	2.00851	Predicted ORF in Assemblies 19, 20 and 21
orf19.318		0.800993	0.106061	1.60554	0.0213007	2.00444	Predicted ORF in Assemblies 19, 20 and 21	GO:0016226 iron-sulfur cluster assembly |		GO:0005759 mitochondrial matrix |
orf19.4192	CDC14	1.01754	0.841083	2.02834	0.000806849	1.99338	Protein involved in exit from mitosis and morphogenesis; ortholog of S. cerevisiae Cdc14p, which is a dual-specificity phosphatase and cell-cycle regulator; suppresses S. cerevisiae cdc15-lyt1, dbf2-2, and (partially) tem1 mutant phenotypes	GO:0007067 mitosis | GO:0006261 DNA-dependent DNA replication | GO:0030448 hyphal growth | GO:0001403 invasive growth in response to glucose limitation | GO:0007096 regulation of exit from mitosis | GO:0000920 cell separation during cytokinesis | GO:0007000 nucleolus organization | GO:0006470 protein amino acid dephosphorylation |	GO:0008138 protein tyrosine/serine/threonine phosphatase activity |	GO:0005634 nucleus | GO:0005730 nucleolus | GO:0030428 cell septum | GO:0005816 spindle pole body | GO:0030869 RENT complex |
orf19.2839	CIRT4B	0.962014	0.621766	1.891	0.0493519	1.96566	Decreased transcription is observed in an azole-resistant strain that overexpresses CDR1 and CDR2
orf19.1130		1.00161	0.988233	1.96784	0.00108181	1.96468	Predicted ORF from Assembly 19; removed from Assembly 20
orf19.4379	PRP13	0.783302	0.520741	1.53861	0.0217199	1.96427	Predicted ORF in Assemblies 19, 20 and 21; fungal-specific (no human or murine homolog)	GO:0006364 rRNA processing | GO:0000002 mitochondrial genome maintenance |	GO:0004527 exonuclease activity |	GO:0005743 mitochondrial inner membrane |
orf19.3811	GYP1	0.759523	0.718638	1.46753	0.0143546	1.93218	Transcription is regulated by Nrg1p, Mig1p, and Tup1p	GO:0016192 vesicle-mediated transport |	GO:0005097 Rab GTPase activator activity |	GO:0005739 mitochondrion | GO:0005794 Golgi apparatus |
orf19.2803	HEM13	1.53171	0.321892	2.95944	0.0105539	1.93211	Coproporphyrinogen III oxidase; antigenic in human, mouse; localizes to yeast-form cell surface, not hyphae; soluble in hyphae; iron-regulated expression; macrophage-downregulated protein; not Rfg1p regulated, farnesol-induced	GO:0006783 heme biosynthetic process |	GO:0004109 coproporphyrinogen oxidase activity |	GO:0030445 yeast-form cell wall | GO:0009986 cell surface | GO:0005625 soluble fraction | GO:0005743 mitochondrial inner membrane | GO:0005829 cytosol |
orf19.5614		0.687818	0.35891	1.32825	0.0221255	1.93111	Predicted ORF in Assemblies 19, 20 and 21	GO:0006260 DNA replication | GO:0006401 RNA catabolic process | GO:0007047 cell wall organization |	GO:0004523 ribonuclease H activity |	GO:0005623 cell |
orf19.5313		0.846736	0.134548	1.61432	0.0467227	1.90652	Predicted ORF from Assembly 19; merged with orf19.1430 in Assembly 20
orf19.1078	HBR2	1.27758	0.632118	2.41936	0.00439976	1.89371	Uncharacterized protein, regulated by Gcn4p and hemoglobin; protein detected by mass spec in stationary phase cultures	GO:0019265 glycine biosynthetic process, by transamination of glyoxylate |	GO:0008453 alanine-glyoxylate transaminase activity |	GO:0005739 mitochondrion |
orf19.102		0.763489	0.305317	1.42843	0.0493653	1.87093	Predicted ORF in Assemblies 19, 20 and 21; possibly spurious ORF (Annotation Working Group prediction)	GO:0007064 mitotic sister chromatid cohesion |		GO:0008278 cohesin complex |
orf19.1413	YFH1	1.01131	0.883681	1.88553	0.0490305	1.86445	Frataxin; homolog of S. cerevisiae Yfh1p, mammalian frataxin; may be required for iron storage or delivery; role in oxidative stress resistance; transcription regulated by Nrg1p, repressed if iron absent, induced by macrophage interaction	GO:0006979 response to oxidative stress | GO:0006879 cellular iron ion homeostasis | GO:0006749 glutathione metabolic process | GO:0016226 iron-sulfur cluster assembly |	GO:0034986 iron chaperone activity | GO:0004322 ferroxidase activity | GO:0008198 ferrous iron binding |	GO:0005759 mitochondrial matrix |
orf19.326		0.886193	0.655446	1.65073	0.00247856	1.86272	Predicted ORF in Assemblies 19, 20 and 21			GO:0005739 mitochondrion |
orf19.729.1	RGD3	0.668583	0.00758855	1.23575	0.0135913	1.84831	Putative Rho GTPase activating protein; fungal-specific (no human or murine homolog)
orf19.6126	KGD2	0.891667	0.650822	1.63151	0.00167301	1.82973	Protein described as dihydrolipoamide S-succinyltransferase; transcriptionally regulated by iron; expression greater in high iron	GO:0006099 tricarboxylic acid cycle | GO:0006103 2-oxoglutarate metabolic process |	GO:0030523 dihydrolipoamide S-acyltransferase activity | GO:0004149 dihydrolipoyllysine-residue succinyltransferase activity |	GO:0042645 mitochondrial nucleoid | GO:0009353 mitochondrial oxoglutarate dehydrogenase complex |
orf19.4114	FAA2-1	0.723412	0.410626	1.3231	0.0229695	1.82897	Predicted long chain fatty acid CoA ligase; upregulated upon phagocytosis; induced by nitric oxide in yhb1 mutant	GO:0006629 lipid metabolic process | GO:0006499 N-terminal protein myristoylation |	GO:0004467 long-chain-fatty-acid-CoA ligase activity |	GO:0005777 peroxisome |
orf19.2524	MGE1	0.82875	0.0505941	1.49206	0.0158421	1.80038	Predicted ORF in Assemblies 19, 20 and 21; macrophage/pseudohyphal-repressed	GO:0006461 protein complex assembly | GO:0042026 protein refolding | GO:0030150 protein import into mitochondrial matrix |	GO:0051082 unfolded protein binding | GO:0001671 ATPase activator activity |	GO:0001405 presequence translocase-associated import motor | GO:0005759 mitochondrial matrix |
orf19.2532	PRS	0.871465	0.231097	1.54662	0.00591391	1.77473	Putative prolyl-tRNA synthetase; monofunctional Class II synthetase; gene is constitutively expressed		GO:0004827 proline-tRNA ligase activity |	GO:0005739 mitochondrion |
orf19.1701	RKI1	0.767641	0.333362	1.35583	0.0124288	1.76624	Predicted ORF in Assemblies 19, 20 and 21	GO:0008615 pyridoxine biosynthetic process | GO:0006098 pentose-phosphate shunt |	GO:0004751 ribose-5-phosphate isomerase activity |	GO:0005634 nucleus | GO:0005737 cytoplasm |
orf19.1546		1.06794	0.806295	1.84917	0.0214621	1.73153	Predicted ORF in Assemblies 19, 20 and 21			GO:0005886 plasma membrane |
orf19.3219		1.91455	0.156254	3.30847	0.0112223	1.72806	Predicted ORF in Assemblies 19, 20 and 21	GO:0015992 proton transport |
orf19.5205		0.971137	0.887218	1.66768	0.00299228	1.71724	Predicted ORF in Assemblies 19, 20 and 21
orf19.2772	HOS3	0.933342	0.63116	1.59189	0.00308542	1.70558	Histone deacetylase; similar to S. cerevisiae Hos3p; greater expression and longer mRNA in white cells, compared to opaque cells; has conserved deacetylation motif	GO:0010552 positive regulation of gene-specific transcription from RNA polymerase II promoter | GO:0016575 histone deacetylation |	GO:0004407 histone deacetylase activity |	GO:0005634 nucleus | GO:0005737 cytoplasm | GO:0005935 cellular bud neck |
orf19.2289	ARP3	0.724698	0.183713	1.23134	0.0207915	1.69911	Predicted ORF in Assemblies 19, 20 and 21; shows Myo5p-dependent localization to cortical actin patches at hyphal tip; mutation confers hypersensitivity to cytochalasin D	GO:0042493 response to drug | GO:0034314 Arp2/3 complex-mediated actin nucleation |	GO:0005200 structural constituent of cytoskeleton | GO:0003779 actin binding | GO:0005524 ATP binding |	GO:0030479 actin cortical patch | GO:0001411 hyphal tip | GO:0005885 Arp2/3 protein complex | GO:0001950 plasma membrane enriched fraction |
orf19.6191	TLO8	0.73104	0.0066049	1.2328	0.00264847	1.68636	Member of a family of telomere-proximal genes of unknown function; may be spliced in vivo
orf19.2496		0.81367	0.770194	1.36016	0.0387015	1.67164	Predicted ORF in Assemblies 19, 20 and 21; fluconazole-downregulated			GO:0016020 membrane |
orf19.5999	DYN1	0.879416	0.297282	1.46929	0.00179051	1.67076	Dynein heavy chain; dynein is a motor protein that moves toward the microtubule minus end; required for wild-type yeast-form cell separation, spindle positioning, nuclear migration, hyphal growth; transcription is regulated by Mig1p	GO:0040001 establishment of mitotic spindle localization | GO:0040023 establishment of nucleus localization | GO:0030448 hyphal growth | GO:0000132 establishment of mitotic spindle orientation | GO:0000920 cell separation during cytokinesis | GO:0030473 nuclear migration along microtubule | GO:0000022 mitotic spindle elongation | GO:0000070 mitotic sister chromatid segregation |	GO:0008569 minus-end-directed microtubule motor activity |	GO:0030286 dynein complex | GO:0005816 spindle pole body | GO:0005881 cytoplasmic microtubule |
orf19.1252	YME1	0.765573	0.362365	1.27143	0.00523787	1.66075	Protein not essential for viability; similar to S. cerevisiae Yme1p, which is a mitochondrial inner membrane protease of the AAA family	GO:0007005 mitochondrion organization | GO:0006515 misfolded or incompletely synthesized protein catabolic process | GO:0001300 chronological cell aging |	GO:0004176 ATP-dependent peptidase activity |	GO:0031942 i-AAA complex |
orf19.3674	GAL102	0.871588	0.649696	1.44411	0.00326939	1.65687	Predicted ORF in Assemblies 19, 20 and 21; mutation confers hypersensitivity to toxic ergosterol analog	GO:0006012 galactose metabolic process | GO:0042493 response to drug |	GO:0003978 UDP-glucose 4-epimerase activity |	GO:0005737 cytoplasm |
orf19.6563.1		1.05502	0.679184	1.74619	0.0221065	1.65513	ORF Predicted by Annotation Working Group			GO:0005739 mitochondrion |
orf19.2990	XOG1	1.50828	0.491186	2.4933	0.0025104	1.65308	Exo-1,3-beta-glucanase, major exoglucanase; member of family 5 glycosyl hydrolases; affects sensitivity to inhibitors of chitin and glucan synthesis; not required for yeast-to-hyphal transition or for virulence in mouse systemic infection	GO:0007047 cell wall organization | GO:0006073 cellular glucan metabolic process |	GO:0004338 glucan 1,3-beta-glucosidase activity |	GO:0005576 extracellular region | GO:0009277 fungal-type cell wall |
orf19.2863.1		0.874296	0.447902	1.43925	0.0101148	1.64618	ORF Predicted by Annotation Working Group	GO:0045041 protein import into mitochondrial intermembrane space | GO:0006879 cellular iron ion homeostasis | GO:0006979 response to oxidative stress |	GO:0016971 flavin-linked sulfhydryl oxidase activity |	GO:0005758 mitochondrial intermembrane space |
orf19.6437	CDC23	0.86577	0.0818782	1.42311	0.011409	1.64375	Similar to anaphase-promoting complex component; possibly transcriptionally regulated by Tac1p	GO:0000022 mitotic spindle elongation | GO:0007091 mitotic metaphase/anaphase transition | GO:0000070 mitotic sister chromatid segregation | GO:0008054 cyclin catabolic process | GO:0016567 protein ubiquitination | GO:0031145 anaphase-promoting complex-dependent proteasomal ubiquitin-dependent protein catabolic process |	GO:0004842 ubiquitin-protein ligase activity | GO:0005515 protein binding |	GO:0005680 anaphase-promoting complex |
orf19.4732	SEC24	0.643545	0.0179043	1.05589	0.0222641	1.64075	Possible role in ER to Golgi transport; induced upon yeast-hyphal switch	GO:0006888 ER to Golgi vesicle-mediated transport | GO:0006914 autophagy |	GO:0005515 protein binding |	GO:0030127 COPII vesicle coat |
orf19.1440		0.802351	0.304092	1.31457	0.0188493	1.6384	Predicted ORF in Assemblies 19, 20 and 21; possibly spurious ORF (Annotation Working Group prediction)
orf19.6816		0.748468	0.77965	1.20804	0.0214031	1.61402	Predicted ORF in Assemblies 19, 20 and 21	GO:0042843 D-xylose catabolic process | GO:0019568 arabinose catabolic process | GO:0006979 response to oxidative stress |	GO:0004032 aldehyde reductase activity |	GO:0005634 nucleus | GO:0005737 cytoplasm |
orf19.5862		0.477544	0.239856	0.759492	0.0129725	1.59041	Protein described as related to arginases; downregulated upon adherence to polystyrene; regulated by Gcn2p and Gcn4p	GO:0019547 arginine catabolic process to ornithine |	GO:0004053 arginase activity |
orf19.3278	GSY1	1.03069	0.96104	1.6374	0.0132411	1.58865	Protein described as glycogen synthase; enzyme of glycogen metabolism; transcription downregulated upon yeast-hyphal switch and regulated by Efg1p; strong oxidative stress induced; shows colony morphology-related gene regulation by Ssn6p	GO:0005978 glycogen biosynthetic process |	GO:0004373 glycogen (starch) synthase activity |	GO:0005739 mitochondrion |
orf19.3984		0.942266	0.921927	1.48932	0.0207019	1.58058	Predicted ORF in Assemblies 19, 20 and 21; induced in core caspofungin response; increased expression observed in an ssr1 homozygous null mutant; induced by nitric oxide in yhb1 mutant
orf19.6916		0.910982	0.295044	1.42594	0.00796382	1.56528	Predicted ORF in Assemblies 19, 20 and 21	GO:0033615 mitochondrial proton-transporting ATP synthase complex assembly |	GO:0051082 unfolded protein binding |	GO:0005759 mitochondrial matrix | GO:0005739 mitochondrion |
orf19.7006		1.0137	0.943025	1.57791	0.00863728	1.55659	Predicted ORF in Assemblies 19, 20 and 21
orf19.4144		0.935534	0.475103	1.4508	0.0316646	1.55077	Predicted ORF in Assemblies 19, 20 and 21; clade-associated gene expression			GO:0005739 mitochondrion |
orf19.2277	TPK2	0.94639	0.88656	1.45872	0.0300729	1.54135	Catalytic subunit of cAMP-dependent protein kinase (PKA), isoform of Tpk1p; required for wild-type epithelial cell damage and engulfment and oral (not systemic) virulence in mouse; involved in control of morphogenesis and stress response	GO:0006468 protein amino acid phosphorylation | GO:0006950 response to stress | GO:0000902 cell morphogenesis | GO:0030448 hyphal growth | GO:0007124 pseudohyphal growth | GO:0009405 pathogenesis | GO:0044409 entry into host | GO:0007265 Ras protein signal transduction | GO:0001403 invasive growth in response to glucose limitation |	GO:0004691 cAMP-dependent protein kinase activity |	GO:0005737 cytoplasm | GO:0005634 nucleus | GO:0005952 cAMP-dependent protein kinase complex |
orf19.7665		1.16246	0.553518	1.79122	0.000736103	1.54088	Predicted ORF in Assemblies 19, 20 and 21	GO:0006461 protein complex assembly | GO:0009060 aerobic respiration |		GO:0005743 mitochondrial inner membrane |
orf19.524		0.842601	0.49882	1.29326	0.0228023	1.53484	Predicted ORF in Assemblies 19, 20 and 21
orf19.5826		1.02626	0.619321	1.57061	0.0108813	1.53042	Predicted ORF in Assemblies 19, 20 and 21	GO:0006810 transport |	GO:0015185 L-gamma-aminobutyric acid transmembrane transporter activity |	GO:0016020 membrane |
orf19.4403	VPS11	0.800313	0.580281	1.22366	0.0120264	1.52897	Protein involved in protein trafficking; putative role in vesicle-target membrane fusion; mutant lacks vacuole; role in hyphal growth, possibly via vacuole expansion into hypha; role in killing of and survival within macrophage	GO:0007034 vacuolar transport | GO:0007033 vacuole organization | GO:0009306 protein secretion | GO:0030448 hyphal growth | GO:0020012 evasion or tolerance of host immune response | GO:0001410 chlamydospore formation | GO:0009405 pathogenesis | GO:0030447 filamentous growth | GO:0044114 development of symbiont in host | GO:0045324 late endosome to vacuole transport | GO:0006904 vesicle docking du…	GO:0035091 phosphoinositide binding |	GO:0005737 cytoplasm | GO:0033263 CORVET complex | GO:0030897 HOPS complex | GO:0000329 fungal-type vacuole membrane |
orf19.4607		0.963865	0.888653	1.46753	0.0170976	1.52255	Predicted ORF in Assemblies 19, 20 and 21; hyphal induced
orf19.6854	ATP1	0.912265	0.258999	1.37784	0.046707	1.51035	Protein similar to alpha subunit of ATP synthase; antigenic in human, mouse; at surface of hyphae, not yeast-form; soluble protein in hyphae; induced by ciclopirox olamine, ketoconazole, or flucytosine; downregulated by Efg1p, caspofungin	GO:0006754 ATP biosynthetic process | GO:0015986 ATP synthesis coupled proton transport |	GO:0046961 proton-transporting ATPase activity, rotational mechanism | GO:0046933 hydrogen ion transporting ATP synthase activity, rotational mechanism | GO:0016887 ATPase activity |	GO:0030446 hyphal cell wall | GO:0009986 cell surface | GO:0005625 soluble fraction | GO:0005754 mitochondrial proton-transporting ATP synthase, catalytic core | GO:0042645 mitochondrial nucleoid | GO:0005886 plasma membrane |
orf19.2978		1.13401	0.554176	1.71244	0.0034732	1.51007	Predicted ORF in Assemblies 19, 20 and 21; possibly spurious ORF (Annotation Working Group prediction)
orf19.5762	PGA61	1.00654	0.971006	1.51743	0.00789491	1.50757	Putative GPI-anchored protein of unknown function; possibly spurious ORF (Annotation Working Group prediction)			GO:0009986 cell surface |
orf19.4674.1	CRD2	1.34407	0.411706	2.02145	0.0146188	1.50397	Metallothionein; role in adaptation to growth with high concentration of copper ions; basal transcription is cadmium-repressed; regulated by Ssn6p; complements copper sensitivity of an S. cerevisiae cup1 null mutant	GO:0006878 cellular copper ion homeostasis |	GO:0005507 copper ion binding |
orf19.1761		1.18059	0.254364	0.796065	0.048496	0.674292	Predicted ORF in Assemblies 19, 20 and 21	GO:0006487 protein amino acid N-linked glycosylation |	GO:0004579 dolichyl-diphosphooligosaccharide-protein glycotransferase activity |	GO:0008250 oligosaccharyltransferase complex |
orf19.7107		1.08102	0.836601	0.728842	0.0037892	0.67422	Predicted ORF in Assemblies 19, 20 and 21	GO:0042273 ribosomal large subunit biogenesis |		GO:0005634 nucleus | GO:0005737 cytoplasm | GO:0005840 ribosome |
orf19.7555		1.1088	0.840871	0.745172	0.0246954	0.67205	Predicted ORF in Assemblies 19, 20 and 21; possibly spurious ORF (Annotation Working Group prediction)
orf19.1833		1.14996	0.733765	0.768323	0.00142866	0.668133	Predicted ORF in Assemblies 19, 20 and 21	GO:0031118 rRNA pseudouridine synthesis | GO:0000495 box H/ACA snoRNA 3'-end processing | GO:0031120 snRNA pseudouridine synthesis |	GO:0009982 pseudouridine synthase activity | GO:0004730 pseudouridylate synthase activity |	GO:0030686 90S preribosome | GO:0031429 box H/ACA snoRNP complex |
orf19.6680	FGR27	0.862423	0.38364	0.576173	0.0248446	0.668086	Putative transcription factor with zinc cluster DNA-binding motif; lacks an ortholog in S. cerevisiae; transposon mutation affects filamentous growth	GO:0030447 filamentous growth | GO:0006355 regulation of transcription, DNA-dependent |	GO:0003700 transcription factor activity |
orf19.451	SOK1	0.69694	0.504578	0.459121	0.0451144	0.658767	Transcription is induced in response to alpha pheromone in SpiderM medium	GO:0019933 cAMP-mediated signaling |		GO:0005634 nucleus |
orf19.3609	UTP15	0.818293	0.717787	0.535953	0.0295225	0.654965	Predicted ORF in Assemblies 19, 20 and 21; mutation confers resistance to 5-fluorocytosine (5-FC); physically interacts with TAP-tagged Nop1p	GO:0042493 response to drug | GO:0045943 positive regulation of transcription from RNA polymerase I promoter | GO:0000462 maturation of SSU-rRNA from tricistronic rRNA transcript (SSU-rRNA, 5.8S rRNA, LSU-rRNA) |	GO:0030515 snoRNA binding |	GO:0005732 small nucleolar ribonucleoprotein complex | GO:0033553 rDNA heterochromatin | GO:0034455 t-UTP complex | GO:0032040 small-subunit processome |
orf19.6248		0.923009	0.214037	0.604475	0.0442645	0.654896	Predicted ORF in Assemblies 19, 20 and 21
orf19.1789.1	LYS1	0.764813	0.170332	0.500728	0.00185008	0.654707	Saccharopine dehydrogenase (biosynthetic); enzyme of alpha-aminoadipate lysine biosynthesis pathway; functionally complements S. cerevisiae lys1 mutation; fungal-specific (no human or murine homolog)	GO:0019878 lysine biosynthetic process via aminoadipic acid |	GO:0004754 saccharopine dehydrogenase (NAD+, L-lysine-forming) activity |	GO:0005737 cytoplasm |
orf19.2546	TRP2	1.19994	0.534296	0.78484	0.00334253	0.654067	Predicted ORF in Assemblies 19, 20 and 21; regulated by Gcn2p and Gcn4p	GO:0000162 tryptophan biosynthetic process |	GO:0004049 anthranilate synthase activity |	GO:0005950 anthranilate synthase complex |
orf19.6556		1.08109	0.512121	0.704394	0.0365508	0.65156	Predicted ORF in Assemblies 19, 20 and 21
orf19.7383	MNN9	0.895045	0.151273	0.581279	0.016808	0.649441	Protein of N-linked outer-chain mannan biosynthesis; mutant has defective cell wall; required for wild-type hyphal growth; mutant is hygromycin B sensitive and vanadate resistant; has N-terminal membrane-spanning segment (positions 18-34)	GO:0007047 cell wall organization | GO:0000032 cell wall mannoprotein biosynthetic process | GO:0042493 response to drug | GO:0000917 barrier septum formation | GO:0006487 protein amino acid N-linked glycosylation |	GO:0000030 mannosyltransferase activity | GO:0000009 alpha-1,6-mannosyltransferase activity |	GO:0016021 integral to membrane | GO:0000136 alpha-1,6-mannosyltransferase complex |
orf19.7317		1.15633	0.0201223	0.748899	0.0194524	0.647652	Predicted zinc-finger protein of unknown function; has similarity to S. cerevisiae Uga3p, which is a transcription factor involved in the regulation of gamma-aminobutyrate metabolism genes	GO:0006350 transcription | GO:0006355 regulation of transcription, DNA-dependent |	GO:0003700 transcription factor activity |
orf19.204		1.03603	0.562395	0.665339	0.0402966	0.642202	Predicted ORF in Assemblies 19, 20 and 21; possibly spurious ORF (Annotation Working Group prediction)
orf19.6025		0.872391	0.577666	0.556195	0.0376635	0.637553	Predicted ORF in Assemblies 19, 20 and 21	GO:0006488 dolichol-linked oligosaccharide biosynthetic process |	GO:0004577 N-acetylglucosaminyldiphosphodolichol N-acetylglucosaminyltransferase activity |	GO:0005829 cytosol | GO:0043541 UDP-N-acetylglucosamine transferase complex | GO:0005634 nucleus | GO:0042406 extrinsic to endoplasmic reticulum membrane | GO:0005624 membrane fraction |
orf19.5932		1.12497	0.650277	0.714051	0.0083495	0.634731	Predicted ORF in Assemblies 19, 20 and 21; fungal-specific (no human or murine homolog)
orf19.1626		1.2601	0.460119	0.798458	0.0488125	0.633646	Predicted ORF in Assemblies 19, 20 and 21	GO:0050983 spermidine catabolic process to deoxyhypusine, using deoxyhypusine synthase | GO:0008612 peptidyl-lysine modification to hypusine |	GO:0016765 transferase activity, transferring alkyl or aryl (other than methyl) groups |	GO:0005737 cytoplasm |
orf19.909	STP4	0.726111	0.0304608	0.459117	0.00318253	0.632295	Putative transcription factor with zinc finger DNA-binding motif; induced in core caspofungin response; shows colony morphology-related gene regulation by Ssn6p; induced by 17-beta-estradiol, ethynyl estradiol	GO:0006388 tRNA splicing, via endonucleolytic cleavage and ligation | GO:0006355 regulation of transcription, DNA-dependent |	GO:0003700 transcription factor activity | GO:0043565 sequence-specific DNA binding |	GO:0005739 mitochondrion | GO:0005634 nucleus |
orf19.5531	CDC37	0.96024	0.0459234	0.606944	0.0483271	0.632075	Chaperone for Crk1p; interacts with Crk1p kinase domain and with Sti1p; putative phosphorylation site at Ser14; functional homolog of S. cerevisiae Cdc37p; likely to be essential for growth; regulated by Gcn2p and Gcn4p	GO:0006461 protein complex assembly | GO:0042493 response to drug | GO:0000161 MAPKKK cascade involved in osmosensory signaling pathway | GO:0032872 regulation of stress-activated MAPK cascade | GO:0050821 protein stabilization | GO:0051726 regulation of cell cycle | GO:0007103 spindle pole body duplication in nuclear envelope |	GO:0051082 unfolded protein binding |	GO:0005737 cytoplasm |
orf19.477		1.14939	0.143262	0.723091	0.0204661	0.629106	Predicted ORF in Assemblies 19, 20 and 21	GO:0006412 translation |	GO:0008079 translation termination factor activity |	GO:0005739 mitochondrion |
orf19.4662	RLM1	0.979633	0.720144	0.616216	0.00161	0.629027	Putative transcription factor; required for wild-type resistance to cell wall perturbation, caspofungin treatment; regulates caspofungin induction of PGA13	GO:0042493 response to drug | GO:0031505 fungal-type cell wall organization | GO:0006357 regulation of transcription from RNA polymerase II promoter | GO:0007165 signal transduction | GO:0001101 response to acid | GO:0045944 positive regulation of transcription from RNA polymerase II promoter |	GO:0003700 transcription factor activity | GO:0030528 transcription regulator activity | GO:0051019 mitogen-activated protein kinase binding | GO:0016563 transcription activator activity | GO:0008301 DNA bending activity |	GO:0005634 nucleus |
orf19.6795		1.02279	0.896487	0.642069	0.00972424	0.627764	Predicted ORF in Assemblies 19, 20 and 21; possibly spurious ORF (Annotation Working Group prediction)	GO:0045944 positive regulation of transcription from RNA polymerase II promoter | GO:0032880 regulation of protein localization | GO:0006368 RNA elongation from RNA polymerase II promoter | GO:0016578 histone deubiquitination | GO:0006406 mRNA export from nucleus |	GO:0030528 transcription regulator activity |	GO:0005643 nuclear pore | GO:0070390 transcription export complex 2 | GO:0000124 SAGA complex |
orf19.5294	PDB1	1.01622	0.539737	0.619568	0.0464324	0.609678	Protein described as similar to pyruvate dehydrogenase; fluconazole-induced; protein level decreased in stationary phase cultures	GO:0006090 pyruvate metabolic process |	GO:0004739 pyruvate dehydrogenase (acetyl-transferring) activity |	GO:0005967 mitochondrial pyruvate dehydrogenase complex | GO:0042645 mitochondrial nucleoid |
orf19.4635	NIP1	1.0942	0.686757	0.665398	0.0103054	0.608111	Putative translation initiation factor; mutation confers hypersensitivity to roridin A and verrucarin A; genes encoding ribosomal subunits, translation factors, and tRNA synthetases are downregulated upon phagocytosis by murine macrophage	GO:0042493 response to drug | GO:0006413 translational initiation |	GO:0003743 translation initiation factor activity |	GO:0043614 multi-eIF complex | GO:0005852 eukaryotic translation initiation factor 3 complex | GO:0010494 stress granule |
orf19.1033	STR2	0.832411	0.277647	0.503801	0.0115885	0.605232	Protein not essential for viability; similar to S. cerevisiae Str2p, which is cystathionine gamma-synthase involved in sulfur metabolism	GO:0019346 transsulfuration |	GO:0004123 cystathionine gamma-lyase activity | GO:0003962 cystathionine gamma-synthase activity |	GO:0005634 nucleus | GO:0005737 cytoplasm |
orf19.6731.1		1.19096	0.255401	0.717395	0.0304991	0.602369	ORF Predicted by Annotation Working Group
orf19.7366		1.3295	0.483994	0.800358	0.0107809	0.601998	Predicted ORF in Assemblies 19, 20 and 21			GO:0005730 nucleolus |
orf19.3478	NIP7	1.37818	0.560109	0.829039	0.0154039	0.601548	Protein described as a nucleolar protein with role in ribosomal assembly; hyphal induced	GO:0000027 ribosomal large subunit assembly | GO:0006364 rRNA processing | GO:0042273 ribosomal large subunit biogenesis |	GO:0005515 protein binding |	GO:0005730 nucleolus | GO:0030687 preribosome, large subunit precursor |
orf19.6769		1.15991	0.0409336	0.6912	0.0467717	0.595911	Predicted ORF in Assemblies 19, 20 and 21			GO:0005737 cytoplasm |
orf19.5244	MCD4	1.36838	0.0149501	0.810252	0.0383128	0.592125	Protein of major facilitator superfamily; has phosphodiesterase/nucleotide pyrophosphatase domain; similar to S. cerevisiae Mcd4p, which acts in GPI anchor biosynthesis	GO:0006505 GPI anchor metabolic process | GO:0006506 GPI anchor biosynthetic process | GO:0015867 ATP transport |	GO:0051377 mannose-ethanolamine phosphotransferase activity |	GO:0016021 integral to membrane | GO:0000324 fungal-type vacuole | GO:0009277 fungal-type cell wall | GO:0005783 endoplasmic reticulum |
orf19.1170	ARO7	1.18097	0.244511	0.69099	0.0159395	0.585105	Putative chorismate mutase; fungal-specific (no human or murine homolog); alkaline upregulated	GO:0009073 aromatic amino acid family biosynthetic process |	GO:0004106 chorismate mutase activity |	GO:0005634 nucleus | GO:0005737 cytoplasm |
orf19.3582		0.952081	0.417684	0.556723	0.032852	0.584743	Predicted ORF in Assemblies 19, 20 and 21	GO:0016192 vesicle-mediated transport |		GO:0005737 cytoplasm |
orf19.3676	ABP140	1.35718	0.622863	0.792607	0.0277178	0.584008	Protein similar to S. cerevisiae actin-binding protein Abp140p; induced upon biofilm formation
orf19.1663	MNT2	1.1701	0.0878124	0.682184	0.0156677	0.583013	Alpha-1,2-mannosyl transferase; adds third mannose during cell-wall mannoprotein biosynthesis; partially redundant with Mnt1p; role in adherence and virulence; expressed in yeast-form and hyphal cells; fungal-specific	GO:0006057 mannoprotein biosynthetic process | GO:0009405 pathogenesis | GO:0016337 cell-cell adhesion | GO:0007160 cell-matrix adhesion | GO:0030447 filamentous growth | GO:0007047 cell wall organization | GO:0051834 evasion or tolerance of defenses of other organism during symbiotic interaction | GO:0006493 protein amino acid O-linked glycosylation | GO:0000032 cell wall mannoprotein biosynthet…	GO:0000026 alpha-1,2-mannosyltransferase activity |	GO:0000139 Golgi membrane | GO:0016021 integral to membrane |
orf19.3366	CSH3	1.12181	0.655086	0.649485	0.0397396	0.578962	Functional homolog of S. cerevisiae Shr3p, which is a chaperone specific for amino acid permeases; localized to ER; required for wild-type amino-acid responsive hyphal growth and for mouse systemic virulence; regulated by Gcn2p and Gcn4p	GO:0009405 pathogenesis | GO:0030448 hyphal growth | GO:0043090 amino acid import | GO:0006461 protein complex assembly | GO:0031669 cellular response to nutrient levels | GO:0006888 ER to Golgi vesicle-mediated transport | GO:0006457 protein folding |	GO:0051082 unfolded protein binding |	GO:0016021 integral to membrane | GO:0005783 endoplasmic reticulum | GO:0043332 mating projection tip | GO:0030176 integral to endoplasmic reticulum membrane | GO:0005886 plasma membrane |
orf19.2527		0.975828	0.939556	0.56302	0.00263998	0.576966	Predicted ORF in Assemblies 19, 20 and 21; induced upon biofilm formation			GO:0005634 nucleus |
orf19.4370		1.10712	0.613956	0.633112	0.00445992	0.571853	Predicted ORF in Assemblies 19, 20 and 21; induced by nitric oxide; oxidative stress-induced via Cap1p; fungal-specific (no human or murine homolog)
orf19.3275		1.16197	0.259433	0.663452	0.0166881	0.57097	Predicted ORF in Assemblies 19, 20 and 21
orf19.1026.1		0.690694	0.517367	0.393145	0.00566264	0.569202	ORF added to Assembly 21 based on comparative genome analysis
orf19.6594	PLB3	1.11668	0.218286	0.630069	0.00206305	0.564235	Putative secreted phospholipase B; similar to S. cerevisiae Plb3p; putative GPI-anchor; fungal-specific (no human or murine homolog); transcription is positively regulated by Tbf1p	GO:0006660 phosphatidylserine catabolic process | GO:0030384 phosphoinositide metabolic process |	GO:0004622 lysophospholipase activity |	GO:0009986 cell surface | GO:0001950 plasma membrane enriched fraction | GO:0009277 fungal-type cell wall | GO:0005576 extracellular region | GO:0046658 anchored to plasma membrane |
orf19.3130		0.966727	0.891604	0.545282	0.00240328	0.564049	Predicted ORF in Assemblies 19, 20 and 21
orf19.7499.1		1.23349	0.160967	0.693843	0.0265218	0.562503	ORF added to Assembly 21 based on comparative genome analysis
orf19.5032	SIM1	0.757842	0.116802	0.424696	0.000934996	0.560402	Protein involved in cell wall maintenance, redundant with Sun41p; described as a DNA replication regulator; produced under vaginal conditions; macrophage-downregulated gene; transcription is negatively regulated by Rim101p, Cyr1p, Ras1p	GO:0006275 regulation of DNA replication | GO:0007049 cell cycle | GO:0007047 cell wall organization | GO:0000422 mitochondrion degradation |		GO:0009277 fungal-type cell wall | GO:0005576 extracellular region |
orf19.6599.1		0.961604	0.658959	0.535055	0.00546201	0.556419	ORF Predicted by Annotation Working Group	GO:0006412 translation |		GO:0005634 nucleus | GO:0005737 cytoplasm |
orf19.6828.1		2.04605	0.181485	1.13834	0.0247304	0.556358	ORF Predicted by Annotation Working Group	GO:0030970 retrograde protein transport, ER to cytosol | GO:0031204 posttranslational protein targeting to membrane, translocation | GO:0006616 SRP-dependent cotranslational protein targeting to membrane, translocation |	GO:0008565 protein transporter activity | GO:0015450 P-P-bond-hydrolysis-driven protein transmembrane transporter activity |	GO:0005784 translocon complex |
orf19.1986	ARO2	1.12591	0.557223	0.620783	0.0044494	0.551359	Putative chorismate synthase; fungal-specific (no human or murine homolog); protein level decreased in stationary phase cultures	GO:0009073 aromatic amino acid family biosynthetic process |	GO:0042602 flavin reductase activity | GO:0004107 chorismate synthase activity |	GO:0005737 cytoplasm |
orf19.1563	ECM3	0.955457	0.560453	0.524035	0.0451706	0.548466	Predicted ORF in Assemblies 19, 20 and 21	GO:0007047 cell wall organization |		GO:0005783 endoplasmic reticulum |
orf19.6001	SAP3	0.704744	0.00867114	0.3843	0.0009729	0.545305	Secreted aspartyl proteinase; acts in utilization of protein as nitrogen source; virulence role in mouse, guinea pig systemic infection or rat vagina; regulated by growth phase; produced by opaque phase cells; alpha-pheromone repressed	GO:0030163 protein catabolic process | GO:0009405 pathogenesis | GO:0006807 nitrogen compound metabolic process | GO:0044406 adhesion to host | GO:0019538 protein metabolic process | GO:0006465 signal peptide processing |	GO:0004190 aspartic-type endopeptidase activity |	GO:0005576 extracellular region | GO:0005886 plasma membrane |
orf19.6074	HBR1	1.10571	0.590965	0.594383	0.0158897	0.537559	Essential protein involved in regulation of MTL gene expression; hemoglobin-regulated inhibitor of white-opaque switching, which may affect survival in host; activator of MTLalpha1 and MTLalpha2; transcription is activated by hemoglobin	GO:0006979 response to oxidative stress | GO:0000462 maturation of SSU-rRNA from tricistronic rRNA transcript (SSU-rRNA, 5.8S rRNA, LSU-rRNA) |	GO:0017111 nucleoside-triphosphatase activity |	GO:0005634 nucleus | GO:0005737 cytoplasm |
orf19.7050	NOP15	1.19987	0.349717	0.644479	0.00700285	0.537125	Protein described as a nucleolar ribosome biogenesis factor; hyphal-induced expression	GO:0042273 ribosomal large subunit biogenesis | GO:0000915 cytokinesis, contractile ring formation |		GO:0030687 preribosome, large subunit precursor | GO:0005730 nucleolus |
orf19.6717		1.1258	0.731533	0.603035	0.0381967	0.535652	Predicted ORF in Assemblies 19, 20 and 21			GO:0005634 nucleus | GO:0005737 cytoplasm |
orf19.6710	UTP9	1.27945	0.803044	0.678955	0.0251212	0.530662	Predicted ORF in Assemblies 19, 20 and 21; decreased expression observed in an ssr1 homozygous null mutant; decreased expression in response to prostaglandins; physically interacts with TAP-tagged Nop1p	GO:0030490 maturation of SSU-rRNA |	GO:0030515 snoRNA binding |	GO:0005732 small nucleolar ribonucleoprotein complex | GO:0032040 small-subunit processome |
orf19.2618	MET2	0.689649	0.0302551	0.365809	0.0226122	0.530427	Putative homoserine acetyltransferase; Gcn4p-regulated; macrophage/pseudohyphal-repressed; not greatly biofilm induced, in contrast to many sulfur amino acid metabolic genes; no human or murine homolog; virulence-group-correlated expression	GO:0009086 methionine biosynthetic process | GO:0009092 homoserine metabolic process |	GO:0004414 homoserine O-acetyltransferase activity |	GO:0005737 cytoplasm |
orf19.7488		1.22617	0.540033	0.643684	0.00568945	0.524956	Predicted ORF in Assemblies 19, 20 and 21	GO:0000154 rRNA modification | GO:0030490 maturation of SSU-rRNA |	GO:0030515 snoRNA binding |	GO:0030532 small nuclear ribonucleoprotein complex | GO:0032040 small-subunit processome | GO:0034457 Mpp10 complex |
orf19.2231		1.08387	0.0233325	0.561815	0.0346441	0.518343	Predicted ORF in Assemblies 19, 20 and 21
orf19.7161	SUI3	1.34716	0.439826	0.677848	0.0298143	0.503167	Putative translation initiation factor; genes encoding ribosomal subunits, translation factors, and tRNA synthetases are downregulated upon phagocytosis by murine macrophage	GO:0006413 translational initiation |	GO:0003743 translation initiation factor activity |	GO:0005840 ribosome | GO:0043614 multi-eIF complex | GO:0005850 eukaryotic translation initiation factor 2 complex |
orf19.1020		0.708323	0.164757	0.350889	0.00157427	0.495379	Predicted ORF from Assembly 19; removed from Assembly 20; merged with orf19.5719 in Assembly 21
orf19.1813	FLC2	1.13164	0.303495	0.547901	0.000248071	0.484164	Protein involved in heme uptake; putative FAD transporter, similar to S. cerevisiae Flc2p	GO:0015883 FAD transport | GO:0015886 heme transport | GO:0006457 protein folding | GO:0055085 transmembrane transport | GO:0009272 fungal-type cell wall biogenesis |	GO:0015230 FAD transmembrane transporter activity |	GO:0005783 endoplasmic reticulum |
orf19.5912	MAK21	1.41399	0.56977	0.668639	0.00766031	0.472875	Predicted ORF in Assemblies 19, 20 and 21; mutation confers hypersensitivity to tubercidin (7-deazaadenosine)	GO:0042493 response to drug | GO:0000027 ribosomal large subunit assembly |		GO:0030690 Noc1p-Noc2p complex |
orf19.7238	NPL3	1.39457	0.0066107	0.646387	0.00225383	0.463501	Putative RNA-binding protein, ortholog of S. cerevisiae Npl3p; nuclear export is facilitated by Hmt1p; transcription is upregulated in an RHE model of oral candidiasis	GO:0006406 mRNA export from nucleus | GO:0031554 regulation of transcription termination | GO:0007124 pseudohyphal growth | GO:0000398 nuclear mRNA splicing, via spliceosome | GO:0032786 positive regulation of RNA elongation |	GO:0008143 poly(A) RNA binding | GO:0016944 RNA polymerase II transcription elongation factor activity |	GO:0005634 nucleus | GO:0005737 cytoplasm |
orf19.5211	IDP1	0.600315	0.144698	0.273378	0.00690821	0.45539	Protein described as isocitrate dehydrogenase; transcriptionally induced by interaction with macrophage; alkaline upregulated	GO:0006102 isocitrate metabolic process | GO:0006537 glutamate biosynthetic process |	GO:0004450 isocitrate dehydrogenase (NADP+) activity |	GO:0042645 mitochondrial nucleoid |
orf19.6458.1		1.19164	0.459178	0.539859	0.0281317	0.453039	ORF Predicted by Annotation Working Group	GO:0033962 cytoplasmic mRNA processing body assembly | GO:0000398 nuclear mRNA splicing, via spliceosome |	GO:0003723 RNA binding | GO:0031202 RNA splicing factor activity, transesterification mechanism |	GO:0005732 small nucleolar ribonucleoprotein complex | GO:0005730 nucleolus | GO:0005688 U6 snRNP | GO:0046540 U4/U6 x U5 tri-snRNP complex | GO:0000932 cytoplasmic mRNA processing body |
orf19.3730		1.45531	0.0294785	0.645991	0.0236436	0.443885	Protein similar to S. cerevisiae Kre27p, which has a role in resistance to killer toxin; predicted Kex2p substrate			GO:0005783 endoplasmic reticulum |
orf19.7255	RPC10	1.40363	0.176862	0.62193	0.0204348	0.443088	Predicted ORF in Assemblies 19, 20 and 21; flucytosine induced	GO:0006383 transcription from RNA polymerase III promoter | GO:0006366 transcription from RNA polymerase II promoter | GO:0006360 transcription from RNA polymerase I promoter |	GO:0003899 DNA-directed RNA polymerase activity |	GO:0005666 DNA-directed RNA polymerase III complex | GO:0005665 DNA-directed RNA polymerase II, core complex | GO:0005736 DNA-directed RNA polymerase I complex |
orf19.1517	ARO3	1.13183	0.312585	0.496724	0.0386144	0.438869	3-Deoxy-D-arabinoheptulosonate-7-phosphate synthase; enzyme of aromatic amino acid biosynthesis; GCN-regulated; feedback-inhibited by phenylalanine when heterologously produced in S. cerevisiae; Aro3p and Aro4p catalyze the same reaction	GO:0009073 aromatic amino acid family biosynthetic process |	GO:0003849 3-deoxy-7-phosphoheptulonate synthase activity |	GO:0005739 mitochondrion | GO:0005634 nucleus |
orf19.7072	PEL1	1.41438	0.383457	0.603525	0.00549497	0.426706	Predicted enzyme of mitochondrial phospholipid biosynthesis; upregulated in biofilm	GO:0008654 phospholipid biosynthetic process |	GO:0008444 CDP-diacylglycerol-glycerol-3-phosphate 3-phosphatidyltransferase activity |	GO:0005739 mitochondrion |
orf19.1923	RRN3	1.00976	0.783519	0.429593	0.0350836	0.42544	Predicted ORF in Assemblies 19, 20 and 21; caspofungin induced, flucytosine repressed; downregulated in core stress response; decreased expression in response to prostaglandins	GO:0006360 transcription from RNA polymerase I promoter |	GO:0003701 RNA polymerase I transcription factor activity |	GO:0000120 RNA polymerase I transcription factor complex | GO:0005730 nucleolus |
orf19.6477		1.34851	0.29114	0.565786	0.00348286	0.419562	Predicted ORF in Assemblies 19, 20 and 21	GO:0030488 tRNA methylation |	GO:0008176 tRNA (guanine-N7-)-methyltransferase activity | GO:0005515 protein binding |	GO:0005634 nucleus |
orf19.7477	YRB1	1.14951	0.713634	0.48041	0.00410004	0.417927	Functional homolog of S. cerevisiae Yrb1p, which regulates Gsp1p GTPase activity and thereby affects nucleocytoplasmic transport and cytoskeletal dynamics; transcription is not regulated by white-opaque switching or by dimorphic transition	GO:0006913 nucleocytoplasmic transport | GO:0000226 microtubule cytoskeleton organization | GO:0007264 small GTPase mediated signal transduction | GO:0006405 RNA export from nucleus | GO:0006606 protein import into nucleus | GO:0006511 ubiquitin-dependent protein catabolic process | GO:0000082 G1/S transition of mitotic cell cycle |	GO:0008536 Ran GTPase binding | GO:0005096 GTPase activator activity |	GO:0005634 nucleus | GO:0005737 cytoplasm |
orf19.3997	ADH1	3.06297	0.0104456	1.25335	0.0284117	0.409195	Alcohol dehydrogenase; at yeast-form but not hyphal cell surface; soluble in hyphae; immunogenic in human or mouse; complements S. cerevisiae adh1 adh2 adh3 mutation; regulated by growth phase, carbon source; fluconazole-, farnesol-induced	GO:0006096 glycolysis | GO:0044416 induction by symbiont of host defense response | GO:0051701 interaction with host | GO:0006113 fermentation | GO:0042710 biofilm formation |	GO:0004022 alcohol dehydrogenase (NAD) activity | GO:0005515 protein binding |	GO:0005737 cytoplasm | GO:0005576 extracellular region | GO:0009986 cell surface | GO:0009277 fungal-type cell wall | GO:0030445 yeast-form cell wall | GO:0005739 mitochondrion | GO:0030446 hyphal cell wall | GO:0005625 soluble fraction | GO:0005759 mitochondrial matrix | GO:0005886 plasma membrane |
orf19.2287	RPA12	1.43139	0.378224	0.582505	0.0141661	0.406951	Protein described as DNA-directed RNA polymerase I; induced upon adherence to polystyrene	GO:0006360 transcription from RNA polymerase I promoter |	GO:0003899 DNA-directed RNA polymerase activity | GO:0004532 exoribonuclease activity |	GO:0005736 DNA-directed RNA polymerase I complex |
orf19.3220		1.14867	0.773664	0.446655	0.0254076	0.388846	Predicted ORF in Assemblies 19, 20 and 21	GO:0000480 endonucleolytic cleavage in 5'-ETS of tricistronic rRNA transcript (SSU-rRNA, 5.8S rRNA, LSU-rRNA) | GO:0000472 endonucleolytic cleavage to generate mature 5'-end of SSU-rRNA from (SSU-rRNA, 5.8S rRNA, LSU-rRNA) | GO:0000447 endonucleolytic cleavage in ITS1 to separate SSU-rRNA from 5.8S rRNA and LSU-rRNA from tricistronic rRNA transcript (SSU-rRNA, 5.8S rRNA, LSU-rRNA) |		GO:0032040 small-subunit processome | GO:0005730 nucleolus |
orf19.5126		1.28256	0.515212	0.492356	0.00436509	0.383886	Predicted ORF in Assemblies 19, 20 and 21	GO:0006412 translation |	GO:0003723 RNA binding |	GO:0005844 polysome |
orf19.6340		1.55882	0.40514	0.582776	0.0244932	0.373856	Predicted ORF in Assemblies 19, 20 and 21	GO:0006383 transcription from RNA polymerase III promoter | GO:0006366 transcription from RNA polymerase II promoter | GO:0006360 transcription from RNA polymerase I promoter |	GO:0003899 DNA-directed RNA polymerase activity |	GO:0005666 DNA-directed RNA polymerase III complex | GO:0005665 DNA-directed RNA polymerase II, core complex | GO:0005736 DNA-directed RNA polymerase I complex |
orf19.1358	GCN4	0.71692	0.0592197	0.259633	0.0426308	0.362151	Transcriptional activator of general amino acid control response; required for Efg1p-dependent pseudohyphal filament induction by amino acid starvation but not by serum; upregulated in the presence of human whole blood or PMN cells	GO:0045944 positive regulation of transcription from RNA polymerase II promoter | GO:0030447 filamentous growth | GO:0044011 single-species biofilm formation on inanimate substrate | GO:0042594 response to starvation | GO:0030448 hyphal growth | GO:0006357 regulation of transcription from RNA polymerase II promoter | GO:0008652 cellular amino acid biosynthetic process | GO:0006355 regulation of t…	GO:0016563 transcription activator activity | GO:0003700 transcription factor activity | GO:0043565 sequence-specific DNA binding |	GO:0005634 nucleus |
orf19.1091		1.72009	0.224747	0.594094	0.00474639	0.345386	Putative ortholog of S. cerevisiae Nop8p, which is a nucleolar protein required for 60S ribosomal subunit biogenesis	GO:0000027 ribosomal large subunit assembly | GO:0006364 rRNA processing | GO:0042273 ribosomal large subunit biogenesis |	GO:0003723 RNA binding |	GO:0005730 nucleolus |
orf19.6587		1.27615	0.0922321	0.424016	0.00210242	0.332263	Protein similar to S. cerevisiae Ydr152wp; transposon mutation affects filamentous growth	GO:0030447 filamentous growth |		GO:0005737 cytoplasm |
orf19.3990		1.62586	0.284214	0.52986	0.00210506	0.325896	Predicted ORF in Assemblies 19, 20 and 21	GO:0006384 transcription initiation from RNA polymerase III promoter |	GO:0003899 DNA-directed RNA polymerase activity |	GO:0005666 DNA-directed RNA polymerase III complex |
orf19.5550	MRT4	1.32134	0.539763	0.425914	0.00795872	0.322334	Predicted ORF in Assemblies 19, 20 and 21; mutation confers hypersensitivity to tubercidin (7-deazaadenosine); transcription is upregulated in both intermediate and mature biofilms	GO:0042493 response to drug | GO:0006364 rRNA processing | GO:0006402 mRNA catabolic process | GO:0042273 ribosomal large subunit biogenesis |		GO:0005730 nucleolus | GO:0030687 preribosome, large subunit precursor |
orf19.7427		1.65035	0.325857	0.529764	0.00138855	0.321001	Predicted ORF in Assemblies 19, 20 and 21			GO:0000329 fungal-type vacuole membrane |
orf19.3228		1.08467	0.831145	0.339321	0.0240629	0.312832	Predicted ORF in Assemblies 19, 20 and 21; mutation confers hypersensitivity to amphotericin B	GO:0042493 response to drug | GO:0007124 pseudohyphal growth | GO:0001403 invasive growth in response to glucose limitation |		GO:0030137 COPI-coated vesicle | GO:0005794 Golgi apparatus |
orf19.3353		2.14731	0.173898	0.658797	0.00840454	0.306801	Protein described as similar to a mitochondrial complex I intermediate-associated protein; fluconazole-downregulated
orf19.3370	DOT4	1.5602	0.422913	0.47064	0.00020451	0.301653	Protein similar to ubiquitin C-terminal hydrolase; localizes to cell surface of hyphal cells, but not yeast-form cells; repressed upon high-level peroxide stress	GO:0006348 chromatin silencing at telomere | GO:0016579 protein deubiquitination |	GO:0004843 ubiquitin-specific protease activity |	GO:0030446 hyphal cell wall | GO:0009986 cell surface | GO:0005634 nucleus |
orf19.7327	PHO88	1.75368	0.0174603	0.515564	0.00089729	0.293989	Putative role in phosphate transport; biofilm-regulated expression; amphotericin B repressed	GO:0006817 phosphate transport |	GO:0015114 phosphate transmembrane transporter activity |	GO:0016020 membrane | GO:0005739 mitochondrion | GO:0005886 plasma membrane |
orf19.789	PYC2	0.592344	0.0444784	0.167766	0.00155729	0.283225	Putative pyruvate carboxylase, binds to biotin cofactor; up-regulated in mutant lacking the Ssk1p response regulator protein, upon benomyl treatment, or in an azole-resistant strain overexpressing MDR1	GO:0006740 NADPH regeneration | GO:0006094 gluconeogenesis |	GO:0004736 pyruvate carboxylase activity |	GO:0005829 cytosol |
orf19.1589.1		1.00449	0.970657	0.276826	0.00342971	0.275589	ORF added to Assembly 21 based on comparative genome analysis
orf19.2369.1	ATX1	1.79567	0.429226	0.489533	0.0091936	0.272619	ORF Predicted by Annotation Working Group; flucytosine induced; decreased expression observed in an ssr1 homozygous null mutant	GO:0006825 copper ion transport | GO:0006879 cellular iron ion homeostasis | GO:0006979 response to oxidative stress |	GO:0016531 copper chaperone activity |	GO:0005829 cytosol |
orf19.657	SAM2	1.03139	0.836412	0.280699	0.00844639	0.272156	S-adenosylmethionine synthetase, localizes to surface of hyphal cells, but not yeast-form cells; possible biofilm-induced expression (reports differ); alkaline upregulated; Hog1p-induced; farnesol-downregulated	GO:0006556 S-adenosylmethionine biosynthetic process | GO:0006555 methionine metabolic process |	GO:0004478 methionine adenosyltransferase activity |	GO:0030446 hyphal cell wall | GO:0009986 cell surface | GO:0005886 plasma membrane |
orf19.3846	LYS4	1.07352	0.887863	0.290993	0.00526105	0.271063	Protein described as homoaconitase; regulated by Gcn4p, Gcn2p; induced in response to amino acid starvation (3-aminotriazole treatment); upregulated in the presence of human whole blood or polymorphonuclear (PMN) cells	GO:0019878 lysine biosynthetic process via aminoadipic acid |	GO:0004409 homoaconitate hydratase activity |	GO:0005739 mitochondrion |
orf19.6311		0.883735	0.278294	0.234835	0.000216459	0.26573	Predicted ORF in Assemblies 19, 20 and 21
orf19.1235	HOM3	1.45779	0.433884	0.386674	0.0378794	0.265247	Putative L-aspartate 4-P-transferase; fungal-specific (no human or murine homolog); regulated by Gcn2p and Gcn4p	GO:0006555 methionine metabolic process | GO:0042493 response to drug | GO:0009088 threonine biosynthetic process |	GO:0004072 aspartate kinase activity |	GO:0005737 cytoplasm |
orf19.6770		1.67636	0.378328	0.439367	0.0079228	0.262096	Predicted ORF in Assemblies 19, 20 and 21	GO:0006897 endocytosis | GO:0007015 actin filament organization | GO:0000147 actin cortical patch assembly |	GO:0008093 cytoskeletal adaptor activity |	GO:0030479 actin cortical patch |
orf19.7370		1.61207	0.0196354	0.417548	0.0140026	0.259014	Member of family of putative 7-transmembrane, PQ loop-family of G-protein-coupled receptors (GPCRs) similar to S. pombe Stm1p			GO:0000329 fungal-type vacuole membrane |
orf19.7354		1.64464	0.433887	0.38402	0.0324697	0.233498	Predicted ORF in Assemblies 19, 20 and 21; caspofungin induced	GO:0007568 aging |	GO:0008565 protein transporter activity |	GO:0005783 endoplasmic reticulum |
orf19.4760		1.97283	0.401897	0.371922	0.00897786	0.188522	Predicted ORF in Assemblies 19, 20 and 21	GO:0042493 response to drug |		GO:0005634 nucleus | GO:0005737 cytoplasm |
orf19.4630	CPA1	0.432242	0.393074	0.0789363	0.00032457	0.182621	Putative carbamoyl-phosphate synthase subunit; alkaline downregulated; transcription is upregulated in both intermediate and mature biofilms	GO:0006526 arginine biosynthetic process |	GO:0004088 carbamoyl-phosphate synthase (glutamine-hydrolyzing) activity |	GO:0005739 mitochondrion | GO:0005829 cytosol | GO:0005951 carbamoyl-phosphate synthase complex |
orf19.3732	ERG25	1.77737	0.0128537	0.301462	0.0440938	0.169611	Putative C-4 methyl sterol oxidase with role in C4-demethylation of ergosterol biosynthesis intermediates, based on similarity to S. cerevisiae Erg25p; fluconazole-induced; upregulated in biofilm and in azole-resistant strain	GO:0006696 ergosterol biosynthetic process |	GO:0000254 C-4 methylsterol oxidase activity |	GO:0005783 endoplasmic reticulum | GO:0005886 plasma membrane | GO:0005789 endoplasmic reticulum membrane |
orf19.3061.1		1.62446	0.490318	0.273756	0.00814676	0.168521	Predicted ORF in Assembly 20 and 21; gene has intron; similar to RPS22A/orf19.6265		GO:0003735 structural constituent of ribosome |	GO:0022627 cytosolic small ribosomal subunit |
orf19.5905		3.80903	0.091392	0.506775	0.00657801	0.133046	Predicted ORF in Assemblies 19, 20 and 21; induced upon biofilm formation			GO:0030687 preribosome, large subunit precursor | GO:0005730 nucleolus | GO:0005840 ribosome |
orf19.3526	ITR1	1.88359	0.505086	0.209408	0.0260815	0.111175	Inositol transporter required for uptake of exogenous inositol; major facilitator superfamily; 12 probable transmembrane motifs; expressed in rich medium with 2% glucose; fluconazole, caspofungin downregulated	GO:0015758 glucose transport | GO:0015798 myo-inositol transport | GO:0008643 carbohydrate transport |	GO:0005355 glucose transmembrane transporter activity | GO:0005365 myo-inositol transmembrane transporter activity | GO:0051119 sugar transmembrane transporter activity |	GO:0005887 integral to plasma membrane | GO:0016020 membrane |
