# Supplementary material for: A novel genetic circuitry governing hypoxic metabolic flexibility, commensalism and virulence in the fungal pathogen Candida albicans
Source: PLoS Pathog. 2019 Dec 6;15(12):e1007823. doi: 10.1371/journal.ppat.1007823 (PMC6919631; doi:10.1371/journal.ppat.1007823)
Supplement: S3 Table — (XLSX) [file ppat.1007823.s006.xlsx]

## Sheet: Legend
Table S3
Raw data of the WT and sfn5 mutant transcriptomes.

## Sheet: Table S3
Systematic	snf5		WT		Common	WT/snf5	Description	GO biological process	GO molecular function	GO cellular component
	Normalized	t-test P-value	Normalized	t-test P-value
orf19.3982	0.20135	0.529054	24.2118	2.20297e-05	MAL32	120.248	Maltase; induced during growth on sucrose; transcription is induced in response to alpha pheromone in SpiderM medium	GO:0005987 sucrose catabolic process |	GO:0032450 maltase activity |	GO:0005622 intracellular |
orf19.4914.1	0.657474	0.595701	22.8513	0.110136	MAL31	34.7562	ORF added to Assembly 21 based on comparative genome analysis
orf19.3672	1.04926	0.180827	27.4506	0.145958	GAL10	26.1618	UDP-glucose 4-epimerase, required for galactose utilization; mutant shows cell wall defects and increased filamentation; fluconazole-induced; protein detected by mass spec in stationary phase cultures	GO:0030447 filamentous growth | GO:0006979 response to oxidative stress | GO:0009272 fungal-type cell wall biogenesis | GO:0001403 invasive growth in response to glucose limitation | GO:0019388 galactose catabolic process | GO:0033499 galactose catabolic process via UDP-galactose |	GO:0003978 UDP-glucose 4-epimerase activity | GO:0004034 aldose 1-epimerase activity |	GO:0005737 cytoplasm | GO:0005625 soluble fraction |
orf19.3981	0.315331	0.492923	7.63078	0.0257174	MAL31	24.1993	Putative protein of unknown function, transcription is upregulated in clinical isolates from HIV+ patients with oral candidiasis; alkaline upregulated	GO:0000017 alpha-glucoside transport | GO:0008643 carbohydrate transport |	GO:0005352 alpha-glucoside | GO:0005364 maltose | GO:0051119 sugar transmembrane transporter activity |	GO:0005624 membrane fraction | GO:0016020 membrane |
orf19.6229	0.273898	0.491911	4.77014	0.00377071	CAT1	17.4157	Catalase; role in resistance to oxidative stress, neutrophils, peroxide; role in murine systemic virulence; regulated by iron, ciclopirox olamine, fluconazole, growth, carbon source, pH, Rim101p, Ssn6p, Hog1p, farnesol, core stress response	GO:0009405 pathogenesis | GO:0006800 oxygen and reactive oxygen species metabolic process | GO:0042744 hydrogen peroxide catabolic process | GO:0051701 interaction with host | GO:0030448 hyphal growth | GO:0042542 response to hydrogen peroxide | GO:0001315 age-dependent response to reactive oxygen species |	GO:0004096 catalase activity | GO:0005515 protein binding |	GO:0009277 fungal-type cell wall | GO:0005759 mitochondrial matrix | GO:0005782 peroxisomal matrix |
orf19.7514	0.420474	0.435857	6.73997	0.156175	PCK1	16.0295	Phosphoenolpyruvate carboxykinase; role in gluconeogenesis; regulated by hyphal switch, carbon source; repressed on glucose; induced by fluconazole, phagocytosis, H2O2; predicted ATP-dependent, dimeric; predicted PKC phosphorylation sites	GO:0006094 gluconeogenesis |	GO:0004612 phosphoenolpyruvate carboxykinase (ATP) activity |	GO:0005829 cytosol |
orf19.4527	1.18394	0.209994	18.7468	0.113315	HGT1	15.8342	High-affinity glucose transporter, member of major facilitator superfamily; transcription induced by progesterone and by drugs including chloramphenicol and benomyl; likely essential for growth, based on an insertional mutagenesis strategy	GO:0015758 glucose transport | GO:0042493 response to drug | GO:0008643 carbohydrate transport |	GO:0005355 glucose transmembrane transporter activity | GO:0051119 sugar transmembrane transporter activity |	GO:0016021 integral to membrane | GO:0005887 integral to plasma membrane | GO:0016020 membrane | GO:0005886 plasma membrane |
orf19.6491	0.307399	0.529653	4.68014	0.110702		15.225	Predicted ORF in Assemblies 19, 20 and 21
orf19.3548.1	0.837243	0.89239	10.2182	0.110562	WH11	12.2046	Cytoplasmic protein expressed specifically in white phase yeast-form cells; expression in opaque cells increases virulence and frequency of opaque-to-white switching; null mutant shows wild-type switching; similar to S. cerevisiae Hsp12p	GO:0009405 pathogenesis |		GO:0005737 cytoplasm | GO:0005886 plasma membrane | GO:0005634 nucleus | GO:0016023 cytoplasmic membrane-bounded vesicle |
orf19.7668	0.465741	0.541343	5.16824	0.148172	MAL2	11.0968	Alpha-glucosidase that hydrolyzes sucrose; required for sucrose utilization; transcriptionally regulated by Suc1p; expression induced by maltose, repressed by glucose; transposon mutation affects filamentous growth; upregulated in RHE model	GO:0005987 sucrose catabolic process | GO:0030447 filamentous growth | GO:0000025 maltose catabolic process |	GO:0004575 sucrose alpha-glucosidase activity | GO:0004574 oligo-1,6-glucosidase activity |	GO:0005576 extracellular region | GO:0005739 mitochondrion | GO:0005840 ribosome |
orf19.638	0.682016	0.218839	7.19812	0.0298409	FDH1	10.5542	Putative formate dehydrogenase, oxidizes formate to produce CO2; induced during macrophage infection; fluconazole-downregulated; Mig1p regulated; downregulated by Efg1p under yeast, not hyphal, growth conditions; predicted to be cytosolic	GO:0006546 glycine catabolic process | GO:0015942 formate metabolic process | GO:0006735 NADH regeneration | GO:0042183 formate catabolic process |	GO:0008863 formate dehydrogenase activity |	GO:0005829 cytosol |
orf19.7481	0.394118	0.63614	3.87395	0.265479	MDH1	9.82942	Protein described as malate dehydrogenase, mitochondrial; transcription regulated by Mig1p and Tup1p, white-opaque switching; induced in high iron, biofilm; regulated upon phagocytosis; antigenic during murine or human infection	GO:0006099 tricarboxylic acid cycle | GO:0006108 malate metabolic process |	GO:0016615 malate dehydrogenase activity | GO:0004470 malic enzyme activity |	GO:0005739 mitochondrion | GO:0005625 soluble fraction | GO:0005759 mitochondrial matrix |
orf19.822	0.240523	0.477042	2.35896	0.747281		9.80765	Protein detected in some, not all, biofilm extracts; fluconazole-downregulated; greater mRNA abundance observed in cyr1 or ras1 homozygous null mutant than in wild type; protein detected by mass spec in stationary phase cultures			GO:0009986 cell surface |
orf19.5760	1.11233	0.490108	10.2188	0.360186	IHD1	9.18683	Putative GPI-anchored protein of unknown function; alkaline upregulated; greater transcription in hyphal form than yeast form; regulated by Nrg1p, Rfg1p, Tup1p; regulated by Tsa1p, Tsa1Bp in minimal media at 37; not essential for viability			GO:0009986 cell surface | GO:0016021 integral to membrane |
orf19.3733	0.726685	0.517764	6.19941	0.0218361	IDP2	8.53109	Putative isocitrate dehydrogenase; expression is regulated upon white-opaque switching; shows colony morphology-related gene regulation by Ssn6p; protein detected by mass spec in exponential and stationary phase cultures	GO:0006537 glutamate biosynthetic process | GO:0006102 isocitrate metabolic process |	GO:0004450 isocitrate dehydrogenase (NADP+) activity |	GO:0005829 cytosol |
orf19.1847	0.323931	0.498312	2.73519	0.00127962	ARO10	8.44376	Aromatic decarboxylase of the Ehrlich fusel oil pathway of aromatic alcohol biosynthesis; pH-regulated (alkaline downregulated); protein abundance is affected by URA3 expression in the CAI-4 strain background	GO:0000949 aromatic amino acid family catabolic process to alcohol via Ehrlich pathway | GO:0000951 methionine catabolic process to 3-methylthiopropanol | GO:0000950 branched chain family amino acid catabolic process to alcohol via Ehrlich pathway | GO:0006569 tryptophan catabolic process | GO:0006552 leucine catabolic process | GO:0006559 L-phenylalanine catabolic process |	GO:0016831 carboxy-lyase activity | GO:0050177 phenylpyruvate decarboxylase activity |	GO:0005737 cytoplasm |
orf19.3160	0.447008	0.645558	3.73711	0.000535078	HSP12	8.36027	Heat-shock protein; induced upon osmotic/oxidative/cadmium stress, fluphenazine treatment, low iron, CDR1 and CDR2 overexpression, or ssn6 or ssk1 homozygous null mutation; repressed by Hog1p, flucytosine, elevated CO2	GO:0006950 response to stress | GO:0042026 protein refolding | GO:0006979 response to oxidative stress | GO:0009408 response to heat | GO:0006972 hyperosmotic response | GO:0007155 cell adhesion |
orf19.2849	1.07532	0.620466	8.63015	0.259299	AQY1	8.02569	Aquaporin water channel; mutant has increased resistance to osmotic shock; required for wild-type tolerance of freezing; not required for virulence in a mouse model of systemic infection; flucytosine repressed	GO:0006970 response to osmotic stress | GO:0050826 response to freezing | GO:0006833 water transport | GO:0030437 ascospore formation |	GO:0015250 water channel activity |	GO:0016020 membrane | GO:0005886 plasma membrane |
orf19.4216	0.478608	0.655655	3.68818	0.00790478		7.70606	Predicted ORF in Assemblies 19, 20 and 21; decreased expression in hyphae compared to yeast-form cells; transcription is increased in populations of cells exposed to fluconazole over multiple generations	GO:0042026 protein refolding | GO:0006979 response to oxidative stress | GO:0009408 response to heat | GO:0006972 hyperosmotic response | GO:0007155 cell adhesion |		GO:0001950 plasma membrane enriched fraction | GO:0005634 nucleus | GO:0005737 cytoplasm | GO:0005886 plasma membrane |
orf19.4980	0.171105	0.131104	1.29783	0.825218	HSP70	7.58498	Putative hsp70 chaperone; role in sensitivity to beta-defensins; heat-shock, amphotericin B, Cd, ketoconazole-induced; farnesol-downregulated in biofilm; farnesol-induced; surface localized in yeast-form and hyphal cells; antigenic in host	GO:0044416 induction by symbiont of host defense response | GO:0009408 response to heat | GO:0051701 interaction with host | GO:0042026 protein refolding | GO:0006461 protein complex assembly | GO:0009636 response to toxin | GO:0006457 protein folding | GO:0006616 SRP-dependent cotranslational protein targeting to membrane, translocation |	GO:0051082 unfolded protein binding | GO:0042277 peptide binding |	GO:0009986 cell surface | GO:0030445 yeast-form cell wall | GO:0030446 hyphal cell wall | GO:0005829 cytosol | GO:0009277 fungal-type cell wall | GO:0005634 nucleus | GO:0005886 plasma membrane |
orf19.5282	0.390502	0.284931	2.90969	0.367436		7.45116	Predicted ORF in Assemblies 19, 20 and 21; decreased expression in hyphae compared to yeast-form cells; regulated by Efg1p and Efh1p; intron in 5'-UTR; transcriptionally activated by Mnl1p under weak acid stress
orf19.4591	0.506776	0.717697	3.77483	0.413394	CAT2	7.44871	Major carnitine acetyl transferase localized in peroxisomes and mitochondria; involved in intracellular acetyl-CoA transport; transcriptionally induced in macrophage; farnesol-upregulated in biofilm; Hog1p-downregulated	GO:0006084 acetyl-CoA metabolic process | GO:0006520 cellular amino acid metabolic process | GO:0009405 pathogenesis | GO:0042710 biofilm formation | GO:0006635 fatty acid beta-oxidation | GO:0045333 cellular respiration | GO:0009437 carnitine metabolic process |	GO:0004092 carnitine O-acetyltransferase activity |	GO:0005777 peroxisome | GO:0005739 mitochondrion | GO:0005782 peroxisomal matrix |
orf19.6178	0.436613	0.315231	3.20598	0.323158	FBP1	7.34286	Fructose-1,6-bisphosphatase, a key enzyme of gluconeogenesis; involved in the carbohydrate metabolism; regulated by Efg1p, Ssn6p; upregulated upon phagocytosis, effecting switch from glycolysis to gluconeogenesis in macrophage	GO:0006094 gluconeogenesis | GO:0006800 oxygen and reactive oxygen species metabolic process |	GO:0042132 fructose 1,6-bisphosphate 1-phosphatase activity |	GO:0005829 cytosol |
orf19.2608	0.898721	0.279717	6.43829	0.0808343	ADH5	7.16383	Putative alcohol dehydrogenase; soluble protein in hyphae; expression is regulated upon white-opaque switching; fluconazole-induced; antigenic during murine systemic infection; regulated by Nrg1p, Tup1p; macrophage-downregulated protein	GO:0006113 fermentation | GO:0006067 ethanol metabolic process | GO:0042710 biofilm formation |	GO:0004022 alcohol dehydrogenase (NAD) activity |	GO:0005625 soluble fraction | GO:0005737 cytoplasm |
orf19.3668	1.22228	0.114308	8.49892	0.145208	HGT2	6.95335	Putative glucose transporter of the major facilitator superfamily; the C. albicans glucose transporter family comprises 20 members; 12 probable membrane-spanning segments; expressed in rich medium with 2% glucose	GO:0015758 glucose transport | GO:0008643 carbohydrate transport |	GO:0005355 glucose transmembrane transporter activity | GO:0051119 sugar transmembrane transporter activity |	GO:0005887 integral to plasma membrane | GO:0016020 membrane | GO:0005886 plasma membrane |
orf19.3670	0.868383	0.645587	5.99496	0.0855656	GAL1	6.90359	Galactokinase; transcription regulated by galactose; transcription regulated by Mig1p and Tup1p; not required for systemic mouse virulence; farnesol-downregulated in biofilm; fluconazole-induced	GO:0015757 galactose transport | GO:0019388 galactose catabolic process | GO:0000411 positive regulation of transcription by galactose |	GO:0004335 galactokinase activity | GO:0016563 transcription activator activity |	GO:0005634 nucleus | GO:0005737 cytoplasm |
orf19.1354	1.22475	0.904604	8.27561	0.213732	UCF1	6.75698	Transcriptionally regulated by iron or by yeast-hyphal switch; expression greater in high iron, decreased upon yeast-hyphal switch; downregulation correlates with clinical development of fluconazole resistance; Ras1p-regulated			GO:0005634 nucleus | GO:0005737 cytoplasm |
orf19.2515	0.481794	0.511121	3.18995	0.0796725		6.62099	Predicted ORF in Assemblies 19, 20 and 21
orf19.5636	0.188145	0.509639	1.23375	0.682377	RBT5	6.55746	GPI-anchored cell wall protein involved in hemoglobin utilization; expression is regulated by Rfg1p, Rim101p, Tbf1p, iron; repressed by Sfu1p, Hog1p, Tup1p; induced by serum, alkaline pH, ketoconazole, ciclopirox olamine	GO:0006879 cellular iron ion homeostasis | GO:0044011 single-species biofilm formation on inanimate substrate | GO:0020028 hemoglobin import |	GO:0020037 heme binding |	GO:0009986 cell surface | GO:0009277 fungal-type cell wall | GO:0030445 yeast-form cell wall | GO:0005886 plasma membrane |
orf19.2737	0.476239	0.031098	3.07258	0.108261		6.45175	Predicted ORF in Assemblies 19, 20 and 21
orf19.3419	1.02897	0.950299	6.55895	0.0481882	MAE1	6.37431	Malic enzyme, mitochondrial; transcription regulated by Mig1p and Tup1p; shows colony morphology-related gene regulation by Ssn6p	GO:0006520 cellular amino acid metabolic process | GO:0006090 pyruvate metabolic process |	GO:0004470 malic enzyme activity | GO:0016619 malate dehydrogenase (oxaloacetate-decarboxylating) activity |	GO:0005739 mitochondrion |
orf19.7310	0.853169	0.854277	5.38337	0.0817119		6.30985	Protein similar to S. cerevisiae Gin3p; transcription is upregulated in response to treatment with ciclopirox olamine; positively regulated by Sfu1p; Hog1p, fluconazole-downregulated	GO:0007131 reciprocal meiotic recombination |		GO:0001950 plasma membrane enriched fraction | GO:0005739 mitochondrion | GO:0005783 endoplasmic reticulum |
orf19.272	0.470976	0.00262522	2.93101	0.166505	FAA21	6.22327	Predicted acyl CoA synthetase; upregulated upon phagocytosis; transcription is regulated by Nrg1p and Mig1p	GO:0006629 lipid metabolic process | GO:0006499 N-terminal protein myristoylation |	GO:0004467 long-chain-fatty-acid-CoA ligase activity |	GO:0005739 mitochondrion | GO:0005777 peroxisome |
orf19.5307	0.810452	0.35583	4.95784	0.33624	JEN2	6.11738	Protein described as carboxylic acid transporter; induced by Rgt1p; transcription is upregulated in both intermediate and mature biofilms	GO:0015727 lactate transport |	GO:0015129 lactate transmembrane transporter activity | GO:0015306 sialate |	GO:0005886 plasma membrane | GO:0016020 membrane |
orf19.2020	2.4599	0.312827	14.2939	0.0414649	HGT6	5.81079	Putative glucose transporter of major facilitator superfamily; 20 members of C. albicans glucose transporter family; 12 probable membrane-spanning segments; core stress response, fluconazole-induced; expressed in rich medium with 2% glucose	GO:0015758 glucose transport | GO:0008643 carbohydrate transport |	GO:0005355 glucose transmembrane transporter activity | GO:0015578 mannose transmembrane transporter activity | GO:0005353 fructose transmembrane transporter activity | GO:0015146 pentose transmembrane transporter activity | GO:0051119 sugar transmembrane transporter activity |	GO:0005887 integral to plasma membrane | GO:0005624 membrane fraction | GO:0001950 plasma membrane enriched fraction | GO:0005739 mitochondrion | GO:0016020 membrane | GO:0005886 plasma membrane |
orf19.6387	0.143232	0.297347	0.822566	0.825111	HSP104	5.74291	Functional homolog of S. cerevisiae Hsp104p; has chaperone and prion propagation activity in S. cerevisiae; guanidine-insensitive; heat shock/stress induced; downregulated in biofilm upon treatment with farnesol; no human or murine homolog	GO:0051085 chaperone mediated protein folding requiring cofactor | GO:0009408 response to heat | GO:0001319 inheritance of oxidatively modified proteins during replicative cell aging | GO:0070414 trehalose metabolism in response to heat stress | GO:0070389 chaperone cofactor-dependent protein refolding | GO:0034975 protein folding in endoplasmic reticulum | GO:0043335 protein unfolding | GO:00703…	GO:0042623 ATPase activity, coupled | GO:0051082 unfolded protein binding | GO:0043531 ADP binding | GO:0051087 chaperone binding | GO:0005524 ATP binding |	GO:0009986 cell surface | GO:0005634 nucleus | GO:0005737 cytoplasm |
orf19.1743	0.651051	0.640423	3.73518	0.187869	ACS1	5.73716	Putative acetyl-CoA synthetase, similar to S. cerevisiae Acs1p; upregulated in the presence of human neutrophils; fluconazole-downregulated; regulated by Nrg1p and Mig1p; shows colony morphology-related gene regulation by Ssn6p	GO:0006085 acetyl-CoA biosynthetic process | GO:0019654 acetate fermentation | GO:0016573 histone acetylation |	GO:0003987 acetate-CoA ligase activity |	GO:0005829 cytosol | GO:0005739 mitochondrion |
orf19.2192	1.09444	0.738223	5.92812	0.149201	GDH2	5.41656	Putative NAD-specific glutamate dehydrogenase; fungal-specific (no human or murine homolog); transcription is regulated by Nrg1p, Mig1p, Tup1p, and Gcn4p	GO:0006807 nitrogen compound metabolic process |	GO:0004352 glutamate dehydrogenase activity |	GO:0005739 mitochondrion |
orf19.2048	1.10499	0.67292	5.83268	0.310535		5.27849	Transcription is positively regulated by Sfu1p
orf19.7520	0.289323	0.292354	1.48249	0.589504	POT1	5.12399	Putative peroxisomal 3-oxoacyl CoA thiolase; transcription is regulated by Nrg1p and Mig1p; farnesol regulated	GO:0006635 fatty acid beta-oxidation |	GO:0003988 acetyl-CoA C-acyltransferase activity |	GO:0005782 peroxisomal matrix |
orf19.5118	0.608533	0.262735	3.11001	0.13725	SDS24	5.11067	Protein described as similar to S. cerevisiae Ybr214wp; transcription regulated by Mig1p and Tup1p; fluconazole-induced	GO:0007126 meiosis | GO:0006259 DNA metabolic process | GO:0006897 endocytosis | GO:0000920 cell separation during cytokinesis |		GO:0005737 cytoplasm |
orf19.4477	1.47478	0.502509	7.26283	0.417928	CSH1	4.92468	Member of aldo-keto reductase family, similar to aryl alcohol dehydrogenases; role in adhesion to fibronectin, cell surface hydrophobicity; regulated by temperature, growth phase, benomyl, macrophage interaction; azole resistance associated	GO:0007160 cell-matrix adhesion | GO:0009405 pathogenesis | GO:0006081 cellular aldehyde metabolic process | GO:0042710 biofilm formation |	GO:0016491 oxidoreductase activity | GO:0018456 aryl-alcohol dehydrogenase activity |	GO:0005829 cytosol | GO:0009986 cell surface | GO:0030446 hyphal cell wall |
orf19.7437	0.370024	0.0619854	1.80316	0.0169681		4.87309	Predicted ORF in Assemblies 19, 20 and 21
orf19.1655	0.624956	0.539427	2.94141	0.329147	PXP2	4.70658	Putative acyl-CoA oxidase; enzyme of fatty acid beta-oxidation; induced during macrophage infection; expression is opaque specific; has putative peroxisome targeting signal	GO:0006635 fatty acid beta-oxidation |	GO:0003997 acyl-CoA oxidase activity |	GO:0005782 peroxisomal matrix |
orf19.449	0.591941	0.343252	2.77581	0.0351291		4.68933	Predicted ORF in Assemblies 19, 20 and 21; possible phosphatidyl synthase; transcription reduced upon yeast-hyphal switch; protein detected by mass spec in stationary phase cultures			GO:0005739 mitochondrion |
orf19.6322	0.399137	0.441686	1.84788	0.523752	ARD	4.62968	D-arabitol dehydrogenase, NAD-dependent (ArDH); enzyme of D-arabitol and D-arabinose catabolism; D-arabitol is a marker for active infection in humans; has conserved YXXXK motif of short-chain alcohol-polyol-sugar dehydrogenases	GO:0019528 D-arabitol catabolic process to xylulose 5-phosphate | GO:0019571 D-arabinose catabolic process | GO:0009062 fatty acid catabolic process |	GO:0047002 L-arabinitol 2-dehydrogenase activity | GO:0008670 2,4-dienoyl-CoA reductase (NADPH) activity |	GO:0005625 soluble fraction | GO:0005782 peroxisomal matrix |
orf19.5000	0.350369	0.125792	1.6055	0.50139	CYB2	4.58232	Protein described as precursor protein of cytochrome b2; transcriptionally regulated by iron; expression greater in high iron; alkaline downregulated; shows colony morphology-related gene regulation by Ssn6p	GO:0006089 lactate metabolic process |	GO:0004460 L-lactate dehydrogenase (cytochrome) activity |	GO:0005758 mitochondrial intermembrane space |
orf19.7284	0.497527	0.62858	2.27049	0.461104	ASR2	4.56355	Gene regulated by cAMP and by osmotic stress; greater mRNA abundance observed in a cyr1 or ras1 homozygous null mutant than in wild type; protein detected by mass spec in stationary phase cultures
orf19.7051	0.919874	0.622272	4.15736	0.127652		4.51949	Predicted ORF in Assemblies 19, 20 and 21
orf19.918	1.05862	0.920951	4.70541	0.540107	CDR11	4.44486	Putative transporter of PDR subfamily of ABC family; Gcn4p-regulated; upregulated by Rim101p at pH 8	GO:0006855 multidrug transport | GO:0006810 transport |	GO:0008559 xenobiotic-transporting ATPase activity | GO:0042626 ATPase activity, coupled to transmembrane movement of substances | GO:0005524 ATP binding |	GO:0005886 plasma membrane | GO:0016021 integral to membrane |
orf19.5641	0.463649	0.536658	2.02921	0.351085	CAR2	4.37661	Alkaline upregulated; mutation confers hypersensitivity to toxic ergosterol analog, and to amphotericin B	GO:0006527 arginine catabolic process | GO:0042493 response to drug |	GO:0004587 ornithine-oxo-acid transaminase activity |	GO:0005634 nucleus | GO:0005737 cytoplasm |
orf19.2414	0.494776	0.0257143	2.14461	0.386426		4.3345	Predicted ORF in Assemblies 19, 20 and 21			GO:0005739 mitochondrion | GO:0005624 membrane fraction |
orf19.5626	0.495622	0.554528	2.14291	0.46353		4.32367	Predicted ORF in Assemblies 19, 20 and 21; Plc1p-regulated; transcriptionally activated by Mnl1p under weak acid stress
orf19.734	0.853034	0.900101	3.56834	0.00183053	GLK1	4.18311	Putative glucokinase; transcription is regulated upon yeast-hyphal switch; transcriptionally regulated by Efg1p; fluconazole-induced; induced in core stress response; shows colony morphology-related gene regulation by Ssn6p	GO:0006096 glycolysis | GO:0006013 mannose metabolic process | GO:0046323 glucose import |	GO:0004340 glucokinase activity |	GO:0005829 cytosol | GO:0001950 plasma membrane enriched fraction |
orf19.2079	0.813346	0.763265	3.39839	0.196991	PHHB	4.17828	Transposon mutation affects filamentous growth	GO:0030447 filamentous growth |
orf19.670.2	2.65216	0.600151	10.9491	0.265566		4.12836	ORF Predicted by Annotation Working Group
orf19.732	0.805567	0.0214791	3.30619	0.442977		4.10418	Predicted ORF in Assemblies 19, 20 and 21; transcription is upregulated in both intermediate and mature biofilms	GO:0009062 fatty acid catabolic process |	GO:0008670 2,4-dienoyl-CoA reductase (NADPH) activity |	GO:0005782 peroxisomal matrix |
orf19.1826	0.970348	0.792592	3.98211	0.287551	MDM34	4.10379	Putative transcription factor with zinc finger DNA-binding motif; macrophage-downregulated gene	GO:0006355 regulation of transcription, DNA-dependent |	GO:0003700 transcription factor activity |
orf19.6443	0.434407	0.525065	1.77295	0.155234		4.08132	Predicted ORF in Assemblies 19, 20 and 21	GO:0006635 fatty acid beta-oxidation |	GO:0004165 dodecenoyl-CoA delta-isomerase activity |	GO:0005777 peroxisome |
orf19.1974	0.547829	0.620921	2.21252	0.418121	TFS1	4.0387	Transcription is regulated upon yeast-hyphal switch; shows colony morphology-related gene regulation by Ssn6p	GO:0030162 regulation of proteolysis |	GO:0008289 lipid binding | GO:0030414 peptidase inhibitor activity |	GO:0000329 fungal-type vacuole membrane | GO:0000328 fungal-type vacuole lumen |
orf19.4539	0.70451	0.472119	2.81704	0.0448939		3.99859	Predicted ORF in Assemblies 19, 20 and 21	GO:0007264 small GTPase mediated signal transduction |	GO:0004871 signal transducer activity | GO:0005094 Rho GDP-dissociation inhibitor activity |	GO:0005829 cytosol |
orf19.5961	0.614726	0.532871	2.39353	0.329594		3.89365	Predicted ORF in Assemblies 19, 20 and 21; described as similar to S. cerevisiae Nas6p proteasome component; induced upon adherence to polystyrene; regulated by Gcn2p and Gcn4p	GO:0006508 proteolysis | GO:0070682 proteasome regulatory particle assembly |		GO:0005829 cytosol | GO:0005634 nucleus | GO:0005838 proteasome regulatory particle |
orf19.2114	0.362334	0.261706	1.38315	0.411413		3.81733	Predicted ORF in Assemblies 19, 20 and 21
orf19.7021	1.60693	0.701925	6.01797	0.128898	GPH1	3.74501	Putative glycogen phosphorylase; gene regulated by Ssk1p, Mig1p, and Tup1p; fluconazole-induced; localizes to cell surface of hyphal cells, but not yeast-form cells; S. cerevisiae Gph1p is a stress-regulated protein of glycogen metabolism	GO:0005980 glycogen catabolic process |	GO:0008184 glycogen phosphorylase activity |	GO:0030446 hyphal cell wall | GO:0009986 cell surface | GO:0005737 cytoplasm |
orf19.4918	0.785833	0.49926	2.94053	0.00131831		3.74192	Predicted ORF in Assemblies 19, 20 and 21
orf19.5447	0.874651	0.0266985	3.20541	0.241131	HGT19	3.66479	Putative glucose/myo-inositol transporter of major facilitator superfamily; 12 transmembrane segments, extended N terminus; expressed in rich medium, 2% glucose; phagocytosis-induced; C. albicans glucose transporter family has 20 members	GO:0015758 glucose transport | GO:0015798 myo-inositol transport | GO:0008643 carbohydrate transport |	GO:0005355 glucose transmembrane transporter activity | GO:0005365 myo-inositol transmembrane transporter activity | GO:0051119 sugar transmembrane transporter activity |	GO:0005887 integral to plasma membrane | GO:0016020 membrane | GO:0005886 plasma membrane |
orf19.3684	0.859007	0.224466	3.1364	0.0159306		3.6512	Predicted ORF in Assemblies 19, 20 and 21	GO:0030437 ascospore formation | GO:0009062 fatty acid catabolic process |	GO:0008670 2,4-dienoyl-CoA reductase (NADPH) activity |	GO:0005782 peroxisomal matrix |
orf19.3029	0.364646	0.371397	1.32316	0.606298		3.6286	Predicted ORF in Assemblies 19, 20 and 21	GO:0006897 endocytosis |	GO:0003860 3-hydroxyisobutyryl-CoA hydrolase activity |	GO:0005739 mitochondrion |
orf19.3646	0.375432	0.583995	1.34367	0.134596	CTR1	3.57901	Copper transporter; probably multimeric; transcribed if copper limited; induced by Mac1p, macrophage interaction, alkaline pH via Rim101p; 17-beta-estradiol downregulated; complements S. cerevisiae ctr1 ctr3 copper transport mutant	GO:0006825 copper ion transport | GO:0015677 copper ion import | GO:0006827 high-affinity iron ion transport | GO:0006412 translation |	GO:0015088 copper uptake transmembrane transporter activity | GO:0005507 copper ion binding |	GO:0005886 plasma membrane |
orf19.802	0.483165	0.511134	1.70744	0.428833	UGA1	3.53386	Protein described as GABA transaminase; transcription regulated by Mig1p and Tup1p; protein detected by mass spec in stationary phase cultures	GO:0019740 nitrogen utilization | GO:0009450 gamma-aminobutyric acid catabolic process |	GO:0003867 4-aminobutyrate transaminase activity |
orf19.915	0.87527	0.19218	3.08649	0.364876		3.52633	Predicted ORF in Assemblies 19, 20 and 21
orf19.4082	0.913682	0.619567	3.2215	0.396934	DDR48	3.52585	Immunogenic stress-associated protein; regulated by filamentous growth pathways; induced by benomyl, caspofungin, or in azole-resistant strain; Hog1p, farnesol, alkaline downregulated; similar to S. cerevisiae Ddr48p	GO:0006950 response to stress | GO:0030448 hyphal growth | GO:0006979 response to oxidative stress |		GO:0030446 hyphal cell wall |
orf19.4555	1.19131	0.8113	4.12645	0.398879	ALS4	3.46381	ALS family protein; role in adhesion and wild-type germ tube induction; growth and temperature regulated; expressed during infection of human buccal epithelial cells; down-regulated upon vaginal contact; putative GPI-anchored	GO:0016337 cell-cell adhesion | GO:0030448 hyphal growth | GO:0044406 adhesion to host | GO:0006508 proteolysis | GO:0006807 nitrogen compound metabolic process | GO:0000752 agglutination involved in conjugation with cellular fusion | GO:0007124 pseudohyphal growth | GO:0001403 invasive growth in response to glucose limitation |	GO:0050839 cell adhesion molecule binding |	GO:0009277 fungal-type cell wall | GO:0009986 cell surface | GO:0030445 yeast-form cell wall | GO:0000324 fungal-type vacuole | GO:0005886 plasma membrane |
orf19.2685	0.603217	0.782688	2.08924	0.790107	PGA54	3.4635	Putative GPI-anchored protein; hyphal induced; Hog1p-downregulated; induced in a cyr1 or efg1 homozygous null mutant; shows colony morphology-related gene regulation by Ssn6p; upregulated in an RHE model			GO:0009986 cell surface |
orf19.7187	0.656749	0.0640247	2.27036	0.196491	MAM33	3.45697	Predicted ORF in Assemblies 19, 20 and 21; regulated by Ssn6p; protein detected by mass spec in exponential and stationary phase cultures	GO:0009060 aerobic respiration | GO:0042493 response to drug |		GO:0005759 mitochondrial matrix |
orf19.3829	0.558909	0.564992	1.92302	0.207334	PHR1	3.44067	Glycosidase of cell surface; may act on cell-wall beta-1,3-glucan prior to beta-1,6-glucan linkage; E169 and E270 at active site; role in systemic but not vaginal virulence (neutral, not low pH); high pH or filamentation induced	GO:0007047 cell wall organization | GO:0044117 growth of symbiont in host | GO:0044114 development of symbiont in host | GO:0030448 hyphal growth | GO:0009405 pathogenesis | GO:0042493 response to drug | GO:0031505 fungal-type cell wall organization |	GO:0042123 glucanosyltransferase activity | GO:0004553 hydrolase activity, hydrolyzing O-glycosyl compounds | GO:0042124 1,3-beta-glucanosyltransferase activity |	GO:0009986 cell surface | GO:0030446 hyphal cell wall | GO:0030445 yeast-form cell wall | GO:0009277 fungal-type cell wall | GO:0005886 plasma membrane | GO:0046658 anchored to plasma membrane |
orf19.1862	0.761805	0.693299	2.60996	0.139654		3.42602	Possible stress protein; increased transcription is associated with CDR1 and CDR2 overexpression or fluphenazine treatment; transcription regulated by Sfu1p, Nrg1p, Tup1p	GO:0016070 RNA metabolic process |		GO:0005634 nucleus | GO:0005737 cytoplasm |
orf19.2344	0.667577	0.409866	2.28442	0.00113837	ASR1	3.42195	Protein described as similar to heat shock proteins; transcription regulated by cAMP, osmotic stress, ciclopirox olamine, ketoconazole; negatively regulated by Cyr1p, Ras1p; shows colony morphology-related gene regulation by Ssn6p
orf19.85	1.44568	0.0340874	4.83623	0.238307	GPX2	3.34529	Similar to glutathione peroxidase; expression greater in high iron; alkaline upregulated by Rim101p; transcriptionally induced by alpha factor or interaction with macrophage; regulated by Efg1p; caspofungin repressed	GO:0006979 response to oxidative stress |	GO:0004602 glutathione peroxidase activity |
orf19.3369	0.916582	0.375257	3.0565	0.532573	MOH1	3.33467	Protein similar to S. cerevisiae Moh1p; transcription is induced in response to alpha pheromone in SpiderM medium; transcriptionally activated by Mnl1p under weak acid stress
orf19.6844	0.461552	0.516954	1.53755	0.205527	ICL1	3.33126	Isocitrate lyase; enzyme of glyoxylate cycle; required for wild-type virulence in murine systemic infection; no mammalian homolog; gene induced upon phagocytosis by macrophage; farnesol regulated; Pex5p-dependent peroxisomal localization	GO:0006097 glyoxylate cycle | GO:0009405 pathogenesis |	GO:0004451 isocitrate lyase activity |	GO:0005777 peroxisome |
orf19.251	0.50361	0.456202	1.67409	0.812944		3.32419	ThiJ/PfpI protein family; antigenic (Cand a 3 allergen); binds human immunoglobulin E; 2 N-glycosylation motifs; alkaline, fluconazole, Hog1p-downregulated; induced in core stress response or by oxidative stress (via Cap1p)			GO:0030446 hyphal cell wall | GO:0005625 soluble fraction |
orf19.1652	0.502551	0.505447	1.61584	0.179771	POX1-3	3.21526	Predicted acyl-CoA oxidase; farnesol regulated; protein detected by mass spec in stationary phase cultures	GO:0006635 fatty acid beta-oxidation |	GO:0003997 acyl-CoA oxidase activity |	GO:0005782 peroxisomal matrix |
orf19.238	1.11292	0.311618	3.54821	0.215404	CCP1	3.1882	Similar to cytochrome-c peroxidase N terminus; transcription is negatively regulated by Rim101p or alkaline pH; transcription induced by interaction with macrophage or low iron; oxygen-induced activity	GO:0006979 response to oxidative stress |	GO:0004130 cytochrome-c peroxidase activity |	GO:0005758 mitochondrial intermembrane space |
orf19.5565	0.615382	0.477794	1.95796	0.0733173		3.18169	Putative 3-hydroxyisobutyrate dehydrogenase
orf19.4384	0.989219	0.954138	3.11211	0.3999	HXT5	3.14603	Protein described as a sugar transporter; transcription is upregulated in response to treatment with ciclopirox olamine; Snf3p-induced; alkaline downregulated; shows colony morphology-related gene regulation by Ssn6p	GO:0008646 high-affinity hexose transport | GO:0008643 carbohydrate transport |	GO:0015578 mannose transmembrane transporter activity | GO:0005355 glucose transmembrane transporter activity | GO:0005354 galactose transmembrane transporter activity | GO:0005353 fructose transmembrane transporter activity | GO:0015149 hexose transmembrane transporter activity | GO:0051119 sugar transmembrane transporter activity |	GO:0005886 plasma membrane | GO:0016020 membrane |
orf19.882	0.276204	0.485524	0.868761	0.920226	HSP78	3.14536	Protein described as a heat-shock protein; transcriptionally regulated by macrophage response; transcription is regulated by Nrg1p, Mig1p, Gcn2p, Gcn4p, Mnl1p; heavy metal (cadmium) stress-induced	GO:0006461 protein complex assembly | GO:0000002 mitochondrial genome maintenance | GO:0010892 positive regulation of mitochondrial translation in response to stress | GO:0050821 protein stabilization | GO:0042026 protein refolding | GO:0034605 cellular response to heat | GO:0043335 protein unfolding | GO:0030150 protein import into mitochondrial matrix |	GO:0004176 ATP-dependent peptidase activity | GO:0051787 misfolded protein binding | GO:0016887 ATPase activity |	GO:0005759 mitochondrial matrix |
orf19.846	1.01263	0.965451	3.16753	0.00336068		3.12803	Predicted ORF in Assemblies 19, 20 and 21; transcriptionally activated by Mnl1p under weak acid stress	GO:0006508 proteolysis |		GO:0005737 cytoplasm |
orf19.6139	0.542368	0.53057	1.69106	0.184615	FRE7	3.11793	Protein similar to ferric reductase Fre10p; transcription is downregulated in response to treatment with ciclopirox olamine or 17-beta-estradiol; transcriptionally induced by alkaline conditions or interaction with macrophage	GO:0015892 siderophore-iron transport |	GO:0000293 ferric-chelate reductase activity |	GO:0005886 plasma membrane | GO:0016021 integral to membrane |
orf19.3675	0.985899	0.741709	3.04761	0.137311	GAL7	3.0912	Predicted ORF in Assemblies 19, 20 and 21; macrophage/pseudohyphal-repressed	GO:0033499 galactose catabolic process via UDP-galactose |	GO:0017103 UTP | GO:0008108 UDP-glucose |	GO:0005737 cytoplasm |
orf19.3974	0.450403	0.114794	1.37559	0.597529	PUT2	3.05414	Alkaline upregulated; protein detected by mass spec in exponential and stationary phase cultures	GO:0006537 glutamate biosynthetic process | GO:0010133 proline catabolic process to glutamate |	GO:0003842 1-pyrroline-5-carboxylate dehydrogenase activity |	GO:0005739 mitochondrion |
orf19.4317	0.871246	0.422966	2.65408	0.368801	GRE3	3.0463	Similar to D-xylose reductases; antigenic in murine systemic infection; soluble protein in hyphae; transcriptionally induced by macrophage interaction; transcriptionally induced by Mnl1p under weak acid stress, farnesol-induced	GO:0019568 arabinose catabolic process | GO:0019388 galactose catabolic process | GO:0006979 response to oxidative stress | GO:0042843 D-xylose catabolic process |	GO:0004032 aldehyde reductase activity | GO:0047935 glucose 1-dehydrogenase (NADP+) activity |	GO:0005625 soluble fraction | GO:0005634 nucleus | GO:0005737 cytoplasm |
orf19.5971	0.722065	0.619153	2.185	0.343374		3.02604	Predicted ORF in Assemblies 19, 20 and 21
orf19.347	0.888366	0.829552	2.68786	0.338123	RSN1	3.02562	Protein induced during the mating process
orf19.5270	0.753937	0.443502	2.26368	0.125576		3.00248	Predicted ORF in Assemblies 19, 20 and 21
orf19.539	0.560215	0.061845	1.67122	0.109387	LAP3	2.98318	Protein described as an aminopeptidase; transcription is positively regulated by Sfu1p; transcription is repressed in response to alpha pheromone in SpiderM medium; clade-associated gene expression; virulence-group-correlated expression	GO:0043418 homocysteine catabolic process | GO:0046677 response to antibiotic |	GO:0004177 aminopeptidase activity | GO:0003676 nucleic acid binding | GO:0008234 cysteine-type peptidase activity | GO:0030528 transcription regulator activity |	GO:0005739 mitochondrion |
orf19.668	1.07379	0.116157	3.18463	0.38277		2.9658	Predicted ORF in Assemblies 19, 20 and 21	GO:0034984 cellular response to DNA damage stimulus |	GO:0003682 chromatin binding |	GO:0005739 mitochondrion | GO:0070210 Rpd3L-Expanded complex |
orf19.4450.1	0.921997	0.942026	2.73042	0.478008		2.96142	ORF Predicted by Annotation Working Group
orf19.2107.1	0.602395	0.773215	1.78018	0.627358	STF2	2.95517	Protein involved in ATP biosynthesis; decreased expression in hyphae compared to yeast-form cells; downregulated by Efg1p; transcription is upregulated in clinical isolates from HIV+ patients with oral candidiasis	GO:0006754 ATP biosynthetic process |		GO:0005634 nucleus | GO:0005737 cytoplasm | GO:0005840 ribosome |
orf19.5921	0.647228	0.48724	1.89369	0.436469		2.92584	Predicted ORF in Assemblies 19, 20 and 21	GO:0006810 transport |	GO:0005215 transporter activity |
orf19.5045	0.397113	0.433427	1.15699	0.513605		2.91351	Predicted ORF in Assemblies 19, 20 and 21; transcriptionally activated by Mnl1p under weak acid stress	GO:0006470 protein amino acid dephosphorylation | GO:0000173 inactivation of MAPK activity involved in osmosensory signaling pathway | GO:0000750 pheromone-dependent signal transduction involved in conjugation with cellular fusion |	GO:0004725 protein tyrosine phosphatase activity |
orf19.3360	0.880305	0.9036	2.56328	0.443045		2.91181	Predicted ORF in Assemblies 19, 20 and 21; possibly spurious ORF (Annotation Working Group prediction)
orf19.4682	1.09284	0.673244	3.16932	0.222893	HGT17	2.90008	Putative glucose transporter of the major facilitator superfamily; the C. albicans glucose transporter family comprises 20 members; 12 probable membrane-spanning segments; induced at low (0.2%, compared to 2%) glucose in rich media	GO:0015758 glucose transport | GO:0008643 carbohydrate transport |	GO:0005355 glucose transmembrane transporter activity | GO:0015578 mannose transmembrane transporter activity | GO:0005353 fructose transmembrane transporter activity | GO:0051119 sugar transmembrane transporter activity |	GO:0005887 integral to plasma membrane | GO:0016020 membrane |
orf19.6445	0.499678	0.359624	1.43341	0.344465	ECI1	2.86868	Protein similar to S. cerevisiae Eci1p, which is involved in fatty acid oxidation; transposon mutation affects filamentous growth; expression is regulated upon white-opaque switching	GO:0030447 filamentous growth | GO:0006635 fatty acid beta-oxidation |	GO:0004165 dodecenoyl-CoA delta-isomerase activity |	GO:0005777 peroxisome |
orf19.413	0.915569	0.339781	2.61796	0.44131		2.85939	Transcription is positively regulated by Sfu1p
orf19.2076	0.814743	0.717524	2.31047	0.19621		2.83582	Predicted ORF in Assemblies 19, 20 and 21
orf19.5194.1	0.458597	0.447348	1.29743	0.63916		2.82913	ORF Predicted by Annotation Working Group; clade-associated gene expression			GO:0005737 cytoplasm |
orf19.5640	0.516312	0.355167	1.45795	0.029432	PEX5	2.82378	Protein of the Pex5p family; required for PTS1-mediated peroxisomal protein import, fatty acid beta-oxidation; similar to S. cerevisiae Pas10p peroxisomal targeting receptor; macrophage/pseudohyphal-repressed	GO:0006625 protein targeting to peroxisome | GO:0006635 fatty acid beta-oxidation | GO:0016558 protein import into peroxisome matrix | GO:0016560 protein import into peroxisome matrix, docking |	GO:0005052 peroxisome matrix targeting signal-1 binding | GO:0030674 protein binding, bridging |	GO:0005829 cytosol | GO:0005778 peroxisomal membrane |
orf19.3734	0.986187	0.957593	2.77759	0.389122	GEF2	2.8165	Predicted ORF in Assemblies 19, 20 and 21	GO:0030003 cellular cation homeostasis |	GO:0005247 voltage-gated chloride channel activity |	GO:0005798 Golgi-associated vesicle | GO:0005886 plasma membrane |
orf19.3931	0.805909	0.494335	2.25199	0.286914	SFC1	2.79435	Putative acyltransferase; alkaline upregulated; transcription is upregulated in both intermediate and mature biofilms	GO:0015741 fumarate transport | GO:0015744 succinate transport |	GO:0005469 succinate |	GO:0005743 mitochondrial inner membrane | GO:0005739 mitochondrion | GO:0005886 plasma membrane |
orf19.4041	0.673077	0.522197	1.87415	0.0789579	PEX4	2.78445	Predicted ORF in Assemblies 19, 20 and 21; transcription is upregulated in both intermediate and mature biofilms	GO:0000209 protein polyubiquitination | GO:0051865 protein autoubiquitination | GO:0006513 protein monoubiquitination | GO:0016562 protein import into peroxisome matrix, receptor recycling |	GO:0004842 ubiquitin-protein ligase activity |	GO:0005777 peroxisome |
orf19.7077	0.441942	0.500749	1.23008	0.205528		2.78336	Protein with similarity to ferric reductases; transcription is activated by Mac1p under copper starvation; Plc1p-regulated; transcription is negatively regulated by Rim101p	GO:0015677 copper ion import | GO:0006826 iron ion transport |	GO:0000293 ferric-chelate reductase activity |	GO:0005886 plasma membrane |
orf19.815	0.817769	0.0291081	2.26893	0.120898	DCK1	2.77454	Putative guanine nucleotide exchange factor required for embedded filamentous growth; activates Rac1p; contains a DOCKER domain; similar to adjacent DCK2 and to S. cerevisiae Ylr422wp; regulated by Nrg1p	GO:0030447 filamentous growth |		GO:0005737 cytoplasm |
orf19.3439	0.75687	0.31444	2.09959	0.650443		2.77404	Predicted ORF in Assemblies 19, 20 and 21; greater mRNA abundance observed in a cyr1 homozygous null mutant than in wild type
orf19.338	0.70433	0.646691	1.94431	0.459913		2.76051	Predicted ORF in Assemblies 19, 20 and 21; Hog1p-downregulated; shows colony morphology-related gene regulation by Ssn6p; protein detected by mass spec in stationary phase cultures			GO:0005737 cytoplasm |
orf19.3311	0.562227	0.508358	1.54736	0.515318	IFD3	2.75219	Transcription is regulated by Mig1p	GO:0006081 cellular aldehyde metabolic process |	GO:0018456 aryl-alcohol dehydrogenase activity |
orf19.1314	0.806117	0.605869	2.2178	0.37165		2.75121	Predicted ORF in Assemblies 19, 20 and 21
orf19.7676	0.89166	0.83873	2.44192	0.397422	XYL2	2.73862	Protein described as similar to D-xylulose reductase; immunogenic in mouse; soluble protein in hyphae; Hog1p-induced; induced during cell wall regeneration; caspofungin or fluconazole-induced; Mnl1p-induced in weak acid stress		GO:0003939 L-iditol 2-dehydrogenase activity |	GO:0030446 hyphal cell wall | GO:0005625 soluble fraction |
orf19.7094	0.857025	0.646426	2.34623	0.458177	HGT12	2.73764	Glucose, fructose, mannose transporter; major facilitator superfamily; role in macrophage-induced hyphal growth; detected at germ tube plasma membrane by mass spectrometry; Snf3p-induced; 12 probable transmembrane segments	GO:0015758 glucose transport | GO:0030448 hyphal growth | GO:0051594 detection of glucose | GO:0008646 high-affinity hexose transport | GO:0008645 hexose transport | GO:0008643 carbohydrate transport |	GO:0005355 glucose transmembrane transporter activity | GO:0015149 hexose transmembrane transporter activity | GO:0015578 mannose transmembrane transporter activity | GO:0005353 fructose transmembrane transporter activity | GO:0051119 sugar transmembrane transporter activity |	GO:0005887 integral to plasma membrane | GO:0005886 plasma membrane | GO:0016020 membrane |
orf19.4274	0.731801	0.656457	2.00129	0.353929	PUT1	2.73475	Alkaline upregulated by Rim101p	GO:0006537 glutamate biosynthetic process | GO:0010133 proline catabolic process to glutamate |	GO:0004657 proline dehydrogenase activity |	GO:0005739 mitochondrion |
orf19.1433	0.740028	0.612193	2.01546	0.173705		2.7235	Predicted ORF in Assemblies 19, 20 and 21; shows colony morphology-related gene regulation by Ssn6p
orf19.1480	0.646771	0.382941	1.75667	0.380424		2.71606	Protein described as succinate dehydrogenase, enzyme of citric acid cycle; downregulated by Efg1p; repressed by nitric oxide	GO:0006099 tricarboxylic acid cycle |	GO:0000104 succinate dehydrogenase activity |	GO:0005886 plasma membrane |
orf19.93	0.389406	0.00271776	1.05517	0.922091		2.70968	Predicted ORF in Assemblies 19, 20 and 21; shows colony morphology-related gene regulation by Ssn6p	GO:0044114 development of symbiont in host |		GO:0005634 nucleus | GO:0005758 mitochondrial intermembrane space |
orf19.1002	0.780152	0.488164	2.10921	0.206482		2.70359	Predicted ORF in Assemblies 19, 20 and 21; possibly spurious ORF (Annotation Working Group prediction)	GO:0007126 meiosis | GO:0007265 Ras protein signal transduction | GO:0007188 G-protein signaling, coupled to cAMP nucleotide second messenger |	GO:0004016 adenylate cyclase activity |	GO:0005886 plasma membrane |
orf19.7258	0.695711	0.520691	1.87137	0.178576	DDI1	2.68986	Predicted ORF in Assemblies 19, 20 and 21; macrophage/pseudohyphal-repressed	GO:0016192 vesicle-mediated transport | GO:0006511 ubiquitin-dependent protein catabolic process |	GO:0000149 SNARE binding |	GO:0005886 plasma membrane |
orf19.5079	1.53419	0.0329734	4.12067	0.335063	CDR4	2.68589	Putative transporter of ATP-binding cassette (ABC) superfamily; fluconazole, Sfu1p, Hog1p, core stress response induced; caspofungin repressed; fluconazole resistance is not affected by mutation or correlated with expression	GO:0046618 drug export | GO:0006810 transport |	GO:0005215 transporter activity | GO:0042626 ATPase activity, coupled to transmembrane movement of substances | GO:0008559 xenobiotic-transporting ATPase activity | GO:0005524 ATP binding |	GO:0016021 integral to membrane | GO:0005886 plasma membrane |
orf19.3340	0.812648	0.665029	2.17979	0.22301	SOD2	2.68233	Mitochondrial Mn-containing superoxide dismutase; protection against oxidative stress; active as homotetramer; N-terminal 34 amino acids removed upon mitochondrial import; H2O2-induced via Cap1p; alkaline downregulated, farnesol-induced	GO:0006800 oxygen and reactive oxygen species metabolic process | GO:0010226 response to lithium ion | GO:0001320 age-dependent response to reactive oxygen species during chronological cell aging | GO:0001302 replicative cell aging |	GO:0004784 superoxide dismutase activity |	GO:0005739 mitochondrion | GO:0005759 mitochondrial matrix |
orf19.5250	0.54572	0.517629	1.46203	0.624481		2.67909	Predicted ORF in Assemblies 19, 20 and 21
orf19.2173	0.891768	0.674365	2.38761	0.017165	MAF1	2.67739	Protein described as affecting nucleocytoplasmic transport and synthesis of RNA Polymerase III; decreased expression in hyphae compared to yeast-form cells; caspofungin repressed	GO:0016480 negative regulation of transcription from RNA polymerase III promoter |	GO:0016564 transcription repressor activity |	GO:0005634 nucleus |
orf19.3988	0.943869	0.258671	2.49247	0.394708		2.64069	Predicted ORF in Assemblies 19, 20 and 21; transcriptionally activated by Mnl1p under weak acid stress
orf19.1153	1.20572	0.136502	3.17191	0.325104	GAD1	2.63072	Protein described as glutamate decarboxylase; macrophage-downregulated gene; alkaline downregulated; amphotericin B induced; transcriptionally activated by Mnl1p under weak acid stress	GO:0006538 glutamate catabolic process | GO:0006979 response to oxidative stress |	GO:0004351 glutamate decarboxylase activity |	GO:0005737 cytoplasm |
orf19.2768	0.564565	0.443133	1.48362	0.128914	AMS1	2.6279	Putative alpha-mannosidase; transcription is regulated by Nrg1p; induced during cell wall regeneration	GO:0009313 oligosaccharide catabolic process |	GO:0004559 alpha-mannosidase activity |	GO:0005774 vacuolar membrane |
orf19.3310	0.833354	0.08786	2.18843	0.289526		2.62605	Predicted ORF in Assemblies 19, 20 and 21; possibly spurious ORF (Annotation Working Group prediction)
orf19.5125	0.894961	0.0904933	2.34414	0.147336		2.61926	Predicted ORF in Assemblies 19, 20 and 21; expression regulated during planktonic growth
orf19.156	0.626077	0.528034	1.63698	0.321531	FGR51	2.61467	Protein lacking an ortholog in S. cerevisiae; transposon mutation affects filamentous growth	GO:0030447 filamentous growth |
orf19.4450	0.70588	0.620898	1.81595	0.524161		2.57261	Predicted zinc-finger protein of unknown function		GO:0043565 sequence-specific DNA binding |
orf19.5417	1.03038	0.846586	2.65074	0.241546	DOT5	2.57258	Alkaline downregulated	GO:0045454 cell redox homeostasis | GO:0006979 response to oxidative stress |	GO:0008379 thioredoxin peroxidase activity |	GO:0005634 nucleus |
orf19.6578	1.42074	0.60796	3.64447	0.306911		2.5652	Predicted membrane transporter, member of the vesicular neurotransmitter (VNT) family, major facilitator superfamily (MFS); downregulated in core caspofungin response	GO:0006817 phosphate transport | GO:0006836 neurotransmitter transport |	GO:0005315 inorganic phosphate transmembrane transporter activity | GO:0005326 neurotransmitter transporter activity |	GO:0005887 integral to plasma membrane | GO:0016020 membrane |
orf19.5635	0.36687	0.538217	0.931729	0.931722	PGA7	2.53967	Protein described as a putative precursor of a hyphal surface antigen; putative GPI-anchor; induced by ciclopirox olamine, ketoconazole, or by Rim101p at pH 8; regulated during planktonic growth; induced during cell wall regeneration			GO:0009986 cell surface |
orf19.6169	0.885484	0.103645	2.24424	0.308264		2.53448	Predicted ORF in Assemblies 19, 20 and 21; induced by Rgt1p	GO:0007126 meiosis | GO:0006259 DNA metabolic process |
orf19.5132	1.2357	0.552055	3.12704	0.598882		2.53058	Predicted ORF in Assemblies 19, 20 and 21
orf19.6211	0.66893	0.48313	1.69188	0.553397		2.52923	Predicted ORF in Assemblies 19, 20 and 21	GO:0006605 protein targeting | GO:0007059 chromosome segregation |	GO:0030234 enzyme regulator activity |	GO:0005634 nucleus | GO:0005737 cytoplasm |
orf19.1785	0.840554	0.156973	2.1149	0.375593		2.51608	Predicted ORF in Assemblies 19, 20 and 21
orf19.1097	0.747224	0.797321	1.87118	0.730636	ALS2	2.50417	ALS family protein; role in adhesion, biofilm formation, germ tube induction; expressed at infection of human buccal epithelial cells; putative GPI-anchor; induced by ketoconazole, low iron and at cell wall regeneration; regulated by Sfu1p	GO:0016337 cell-cell adhesion | GO:0044011 single-species biofilm formation on inanimate substrate | GO:0009405 pathogenesis | GO:0030448 hyphal growth | GO:0044406 adhesion to host | GO:0000128 flocculation |	GO:0030246 carbohydrate binding |	GO:0009277 fungal-type cell wall | GO:0009986 cell surface |
orf19.1187	0.466041	0.388519	1.16519	0.882705	CPH2	2.50019	Transcriptional activator of hyphal growth; Myc bHLH family: directly regulates Tec1p, which regulates hypha-specific genes; probably homodimeric, phosphorylated; enhances S. cerevisiae nitrogen starvation-induced pseudohyphal growth	GO:0045944 positive regulation of transcription from RNA polymerase II promoter | GO:0030448 hyphal growth | GO:0045449 regulation of transcription | GO:0030447 filamentous growth | GO:0007124 pseudohyphal growth | GO:0006355 regulation of transcription, DNA-dependent |	GO:0003700 transcription factor activity | GO:0003690 double-stranded DNA binding |
orf19.4833	0.462443	0.599862	1.15362	0.85854	MLS1	2.49462	Malate synthase; enzyme of the glyoxylate cycle; peroxisomal; no mammalian homolog; transcription is induced upon phagocytosis by macrophage; regulated upon white-opaque switching; biofilm-repressed; strong oxidative stress induced	GO:0006097 glyoxylate cycle |	GO:0004474 malate synthase activity |	GO:0005782 peroxisomal matrix | GO:0005777 peroxisome |
orf19.5911	0.755861	0.82152	1.88414	0.54103	CMK1	2.4927	Expression is regulated upon white-opaque switching; biochemically purified Ca2+/CaM-dependent kinase is soluble, cytosolic, monomeric, and serine-autophosphorylated	GO:0007165 signal transduction | GO:0006468 protein amino acid phosphorylation |	GO:0004683 calmodulin-dependent protein kinase activity |	GO:0005737 cytoplasm |
orf19.5022	0.926982	0.90556	2.31035	0.0107335		2.49233	Predicted ORF in Assemblies 19, 20 and 21	GO:0006828 manganese ion transport |	GO:0005384 manganese ion transmembrane transporter activity |	GO:0000324 fungal-type vacuole | GO:0005886 plasma membrane | GO:0005739 mitochondrion | GO:0016023 cytoplasmic membrane-bounded vesicle |
orf19.7600	0.70127	0.368517	1.74634	0.310394	FDH3	2.49026	Putative protein of glycine catabolism; downregulated by Efg1p under yeast-form but not hyphal growth conditions; transcriptionally activated by Mnl1p under weak acid stress	GO:0006546 glycine catabolic process | GO:0019649 formaldehyde assimilation | GO:0046294 formaldehyde catabolic process | GO:0033859 furaldehyde metabolic process | GO:0000947 amino acid catabolic process to alcohol via Ehrlich pathway |	GO:0004022 alcohol dehydrogenase (NAD) activity | GO:0033833 hydroxymethylfurfural reductase (NADH) activity | GO:0051903 S-(hydroxymethyl)glutathione dehydrogenase activity |	GO:0005739 mitochondrion |
orf19.2841	0.910037	0.580932	2.24245	0.244862	PGM2	2.46413	Protein not essential for viability; similar to S. cerevisiae Pgm2p, which is phosphoglucomutase	GO:0006010 glucose 6-phosphate utilization | GO:0006008 glucose 1-phosphate utilization | GO:0005978 glycogen biosynthetic process | GO:0006011 UDP-glucose metabolic process | GO:0005992 trehalose biosynthetic process | GO:0019388 galactose catabolic process | GO:0006874 cellular calcium ion homeostasis |	GO:0004614 phosphoglucomutase activity |	GO:0005829 cytosol | GO:0005737 cytoplasm |
orf19.1999	0.998846	0.966985	2.44604	0.271862		2.44887	Predicted ORF in Assemblies 19, 20 and 21
orf19.6724	1.34744	0.798751	3.29108	0.587684	FUM12	2.44246	Protein described as similar to fumarate hydratase, enzyme of citric acid cycle; fluconazole-downregulated; downregulated by Efg1p; transcriptionally regulated by iron; expression greater in high iron	GO:0006099 tricarboxylic acid cycle | GO:0006106 fumarate metabolic process |	GO:0004333 fumarate hydratase activity |	GO:0005759 mitochondrial matrix | GO:0005829 cytosol |
orf19.2172	1.03189	0.299573	2.49926	0.5268	ARA1	2.42202	D-Arabinose dehydrogenase; in dehydro-D-arabinono-1,4-lactone biosynthesis; NADP+ cofactor; active toward D-arabinose, L-fucose, L-xylose, L-galactose; inhibited by metal ions, thiol group-specific reagents; induced on polystyrene adherence	GO:0019752 carboxylic acid metabolic process | GO:0005975 carbohydrate metabolic process |	GO:0045290 D-arabinose 1-dehydrogenase [NAD(P)+] activity |	GO:0005829 cytosol |
orf19.7567	0.965055	0.775941	2.32953	0.0578873		2.41388	Predicted ORF in Assemblies 19, 20 and 21; transcription is induced in response to alpha pheromone in SpiderM medium
orf19.6116	0.978205	0.824722	2.35971	0.626788	GLK4	2.41228	Protein described as a glucokinase; decreased expression in hyphae compared to yeast-form cells	GO:0005975 carbohydrate metabolic process |	GO:0004340 glucokinase activity |	GO:0005829 cytosol |
orf19.4342	0.906478	0.83064	2.18405	0.472457		2.40939	Predicted ORF in Assemblies 19, 20 and 21	GO:0015918 sterol transport | GO:0006357 regulation of transcription from RNA polymerase II promoter |	GO:0003700 transcription factor activity | GO:0003704 specific RNA polymerase II transcription factor activity |	GO:0005634 nucleus |
orf19.4936.1	1.09351	0.822415	2.6297	0.506004		2.40483	ORF added to Assembly 21 based on comparative genome analysis
orf19.94	0.718756	0.473374	1.72434	0.193381		2.39906	Predicted ORF in Assemblies 19, 20 and 21
orf19.3133	1.78049	0.462284	4.26972	0.308867	GUT2	2.39806	Predicted ORF in Assemblies 19, 20 and 21; Plc1p-regulated; transcription is upregulated in both intermediate and mature biofilms	GO:0001302 replicative cell aging | GO:0006116 NADH oxidation | GO:0005975 carbohydrate metabolic process |	GO:0004368 glycerol-3-phosphate dehydrogenase activity |	GO:0031307 integral to mitochondrial outer membrane | GO:0005886 plasma membrane |
orf19.3021	0.797772	0.586564	1.91144	0.162981		2.39597	Predicted ORF in Assemblies 19, 20 and 21; induced during planktonic growth			GO:0005634 nucleus | GO:0005737 cytoplasm | GO:0005840 ribosome |
orf19.2896	0.550285	0.566116	1.31548	0.314151	SOU1	2.39055	Enzyme involved in utilization of L-sorbose; has sorbitol dehydrogenase, fructose reductase, and sorbose reductase activities; has NAD-binding site motif; transcriptional regulation affected by chromosome 5 copy number	GO:0042850 L-sorbose catabolic process | GO:0009062 fatty acid catabolic process |	GO:0008670 2,4-dienoyl-CoA reductase (NADPH) activity | GO:0032115 sorbose reductase activity | GO:0050085 mannitol 2-dehydrogenase (NADP+) activity |	GO:0005782 peroxisomal matrix |
orf19.6874	0.593682	0.559028	1.41164	0.652211		2.37777	Predicted ORF in Assemblies 19, 20 and 21
orf19.1290	1.00988	0.964062	2.3974	0.569573	XKS1	2.37395	Predicted ORF in Assemblies 19, 20 and 21; increased expression in response to prostaglandins	GO:0005998 xylulose catabolic process |	GO:0004856 xylulokinase activity |	GO:0005737 cytoplasm |
orf19.7131	0.901144	0.772907	2.13831	0.0460531		2.37289	Butyrobetaine dioxygenase, the fourth enzyme of the carnitine biosynthesis pathway	GO:0045329 carnitine biosynthetic process |	GO:0008336 gamma-butyrobetaine dioxygenase activity |	GO:0005739 mitochondrion |
orf19.5686	0.428553	0.24512	1.01562	0.965998		2.36987	Predicted ORF in Assemblies 19, 20 and 21
orf19.1868	0.994554	0.93039	2.35461	0.307397	RNR22	2.36751	Protein described as ribonucleoside diphosphate reductase; shows colony morphology-related gene regulation by Ssn6p; RNA abundance regulated by tyrosol and cell density	GO:0006260 DNA replication |	GO:0004748 ribonucleoside-diphosphate reductase activity |	GO:0005829 cytosol |
orf19.3707	2.42149	0.205801	5.71964	0.196707	YHB1	2.36203	Nitric oxide dioxygenase; acts in nitric oxide scavenging/detoxification; role in virulence in mouse; not essential for viability; similar to S. cerevisiae Yhb1p; transcription activated by NO, macrophage interaction; hyphal downregulated	GO:0009405 pathogenesis | GO:0009636 response to toxin | GO:0046210 nitric oxide catabolic process | GO:0052565 response to defense-related host nitric oxide production | GO:0006950 response to stress |	GO:0008941 nitric oxide dioxygenase activity | GO:0016966 nitric oxide reductase activity |	GO:0005829 cytosol | GO:0005759 mitochondrial matrix |
orf19.4655	0.750712	0.405893	1.77041	0.0670361	OPT6	2.3583	Putative oligopeptide transporter; fungal-specific (no human or murine homolog); expression of OPT6, OPT7, or OPT8 does not suppress defect of mutant lacking Opt1p, Opt2p, and Opt3p; alleles are nonidentical	GO:0006857 oligopeptide transport | GO:0042493 response to drug |	GO:0015198 oligopeptide transporter activity |
orf19.376	0.60893	0.352048	1.43591	0.340365		2.35809	Predicted ORF in Assemblies 19, 20 and 21
orf19.4894	0.620101	0.424218	1.45838	0.0417688		2.35184	Protein of unknown function, has similarity to S. cerevisiae Yer010cp, which is a protein of unknown function belonging to the prokaryotic RraA family; decreased transcription is observed upon benomyl treatment
orf19.6492	0.939034	0.286753	2.20609	0.196859		2.34932	Predicted ORF in Assemblies 19, 20 and 21	GO:0006468 protein amino acid phosphorylation | GO:0006261 DNA-dependent DNA replication |	GO:0004672 protein kinase activity |	GO:0005623 cell |
orf19.4864	0.5577	0.466711	1.30454	0.562586		2.33914	Predicted ORF in Assemblies 19, 20 and 21		GO:0017171 serine hydrolase activity |	GO:0001950 plasma membrane enriched fraction | GO:0005811 lipid particle | GO:0005741 mitochondrial outer membrane |
orf19.3359	0.898158	0.388936	2.10047	0.0444882	ARP8	2.33864	Predicted ORF in Assemblies 19, 20 and 21; mutation confers hypersensitivity to toxic ergosterol analog, and to amphotericin B	GO:0042493 response to drug | GO:0006338 chromatin remodeling | GO:0006974 response to DNA damage stimulus | GO:0006312 mitotic recombination |	GO:0043140 ATP-dependent 3'-5' DNA helicase activity |	GO:0031011 Ino80 complex |
orf19.7086	0.519466	0.290238	1.20617	0.327469		2.32194	Predicted ORF in Assemblies 19, 20 and 21	GO:0006606 protein import into nucleus |	GO:0008320 protein transmembrane transporter activity |	GO:0005634 nucleus | GO:0005737 cytoplasm |
orf19.4407	0.693782	0.128003	1.60888	0.080564		2.31901	Predicted ORF in Assemblies 19, 20 and 21
orf19.3364	0.895657	0.705166	2.07345	0.0794401		2.315	Predicted ORF in Assemblies 19, 20 and 21; possibly spurious ORF (Annotation Working Group prediction)
orf19.5005	0.449174	0.463322	1.03438	0.946953	OSM2	2.30286	Protein described as mitochondrial fumarate reductase; regulated by Ssn6p, Gcn2p, and Gcn4p; Hog1p-downregulated; protein detected by mass spec in stationary phase cultures	GO:0008152 metabolic process |	GO:0016156 fumarate reductase (NADH) activity |	GO:0005739 mitochondrion |
orf19.6830	0.618216	0.5043	1.41692	0.562052		2.29195	Putative enoyl-CoA hydratase
orf19.4066	0.879623	0.734843	2.01175	0.366346		2.28706	Predicted ORF in Assemblies 19, 20 and 21; Hog1p-downregulated
orf19.3171	1.0264	0.696311	2.316	0.052212	ACH1	2.25644	Acetyl-coA hydrolase; acetate utilization; nonessential; soluble protein in hyphae; antigenic in human; induced on polystyrene adherence; farnesol-, ketoconazole-induced; no human or murine homolog	GO:0006084 acetyl-CoA metabolic process | GO:0006083 acetate metabolic process |	GO:0003986 acetyl-CoA hydrolase activity |	GO:0005625 soluble fraction | GO:0005739 mitochondrion | GO:0005829 cytosol |
orf19.7500	0.690501	0.628363	1.55657	0.00158587	PXA1	2.25426	Putative peroxisomal, half-size adrenoleukodystrophy protein (ALD or ALDp) subfamily ABC family transporter	GO:0006810 transport | GO:0015908 fatty acid transport |	GO:0042626 ATPase activity, coupled to transmembrane movement of substances | GO:0005524 ATP binding |	GO:0016021 integral to membrane | GO:0005779 integral to peroxisomal membrane |
orf19.3038	0.816618	0.601444	1.83977	0.217605	TPS2	2.25291	Trehalose-6-phosphate (Tre6P) phosphatase; mutation causes heat sensitivity, Tre6P accumulation, and decreased mouse virulence; possible drug target; two conserved phospohydrolase motifs; no human or murine homolog	GO:0005992 trehalose biosynthetic process | GO:0030448 hyphal growth | GO:0009405 pathogenesis | GO:0009408 response to heat | GO:0006979 response to oxidative stress | GO:0006970 response to osmotic stress |	GO:0004805 trehalose-phosphatase activity |	GO:0005739 mitochondrion | GO:0005946 alpha,alpha-trehalose-phosphate synthase complex (UDP-forming) |
orf19.1331	0.703189	0.55602	1.57903	0.158255	HSM3	2.24552	Protein not essential for viability; similar to S. cerevisiae Hsm3p, which may be involved in DNA mismatch repair	GO:0006298 mismatch repair |
orf19.1277	1.06311	0.249594	2.38523	0.294319		2.24364	Predicted ORF in Assemblies 19, 20 and 21; repressed by Rgt1p
orf19.362	0.734593	0.544487	1.64368	0.360896	TLO9	2.23754	Member of a family of telomere-proximal genes of unknown function
orf19.6837	3.28146	0.536199	7.31762	0.43432		2.22999	Predicted ORF in Assemblies 19, 20 and 21			GO:0005737 cytoplasm |
orf19.7680	0.634426	0.167139	1.4136	0.0171152	CTA26	2.22816	Putative transcriptional activator; downregulated by Efg1p; transcription is upregulated in an RHE model of oral candidiasis; member of a family of telomere-proximal genes	GO:0045893 positive regulation of transcription, DNA-dependent |	GO:0016563 transcription activator activity |
orf19.1203	0.709949	0.548358	1.57497	0.522515	SRO77	2.21842	Predicted ORF in Assemblies 19, 20 and 21; filament induced; fungal-specific (no human or murine homolog)	GO:0006887 exocytosis | GO:0006893 Golgi to plasma membrane transport |		GO:0005886 plasma membrane |
orf19.1704	0.574489	0.181259	1.27142	0.64377	FOX3	2.21314	Putative peroxisomal 3-oxoacyl CoA thiolase; expression is regulated upon white-opaque switching	GO:0006635 fatty acid beta-oxidation |	GO:0003988 acetyl-CoA C-acyltransferase activity |	GO:0005782 peroxisomal matrix |
orf19.7227	1.06003	0.503924	2.34516	0.334548		2.21235	Predicted ORF in Assemblies 19, 20 and 21; mutation confers hypersensitivity to toxic ergosterol analog	GO:0042493 response to drug | GO:0005977 glycogen metabolic process | GO:0006470 protein amino acid dephosphorylation |	GO:0004864 phosphoprotein phosphatase inhibitor activity |	GO:0005634 nucleus |
orf19.2959.1	1.15304	0.731958	2.54649	0.00689804		2.20851	ORF Predicted by Annotation Working Group	GO:0006812 cation transport |		GO:0005886 plasma membrane |
orf19.740	0.965082	0.884774	2.13099	0.648572	HAP41	2.2081	Predicted ORF in Assemblies 19, 20 and 21; not required for response to low iron; possibly spurious ORF (Annotation Working Group prediction); transcriptionally activated by Mnl1p under weak acid stress	GO:0006350 transcription | GO:0006109 regulation of carbohydrate metabolic process | GO:0033217 regulation of transcription from RNA polymerase II promoter in response to iron ion starvation |	GO:0016563 transcription activator activity |	GO:0016602 CCAAT-binding factor complex |
orf19.4910	1.51547	0.316458	3.34306	0.546534	FGR41	2.20595	Putative GPI-anchored protein; transposon mutation affects filamentous growth; possibly spurious ORF (Annotation Working Group prediction)	GO:0030447 filamentous growth | GO:0007109 cytokinesis, completion of separation | GO:0007124 pseudohyphal growth |		GO:0009986 cell surface | GO:0009277 fungal-type cell wall | GO:0005576 extracellular region |
orf19.1288	0.715503	0.364571	1.57744	0.627742	FOX2	2.20466	Predicted 3-hydroxyacyl-CoA epimerase, required for fatty acid beta-oxidation; upregulated upon phagocytosis; transcription is regulated by Mig1p and by white-opaque switching; transcriptional activation by oleate requires Ctf1p	GO:0006635 fatty acid beta-oxidation | GO:0006097 glyoxylate cycle | GO:0009062 fatty acid catabolic process | GO:0009405 pathogenesis |	GO:0004300 enoyl-CoA hydratase activity | GO:0003857 3-hydroxyacyl-CoA dehydrogenase activity |	GO:0005782 peroxisomal matrix |
orf19.1348	0.309216	0.469811	0.680303	0.370063		2.20009	Predicted ORF in Assemblies 19, 20 and 21
orf19.986	1.1928	0.734535	2.62331	0.160732	GLY1	2.19928	L-threonine aldolase; possibly tetrameric; complements the glycine auxotrophy of an S. cerevisiae shm1 null shm2 null gly1-1 triple mutant; macrophage/pseudohyphal-induced; the GLY1 locus has an RFLP and is triploid in strain SGY269	GO:0006730 one-carbon metabolic process | GO:0006544 glycine metabolic process | GO:0006567 threonine catabolic process | GO:0006545 glycine biosynthetic process |	GO:0004793 threonine aldolase activity |
orf19.6550	0.877625	0.13051	1.92657	0.00885792		2.19521	Predicted ORF in Assemblies 19, 20 and 21			GO:0005741 mitochondrial outer membrane |
orf19.3893	1.43421	0.0255852	3.14379	0.440935	SCW11	2.192	Cell wall protein; transcription is decreased in mutant lacking ACE2; downregulated in core caspofungin response; transcriptionally regulated by iron; expression greater in high iron	GO:0007109 cytokinesis, completion of separation |	GO:0004338 glucan 1,3-beta-glucosidase activity |	GO:0009277 fungal-type cell wall | GO:0005576 extracellular region |
orf19.1985	0.729689	0.548503	1.5959	0.286867		2.18709	Predicted ORF in Assemblies 19, 20 and 21
orf19.3743	0.323102	0.256865	0.705715	0.168463		2.18418	Predicted ORF in Assemblies 19, 20 and 21
orf19.7490	0.933584	0.204723	2.03728	0.259116		2.18222	Predicted membrane transporter, member of the fucose:proton symporter (FHS) family, major facilitator superfamily (MFS)			GO:0030137 COPI-coated vesicle | GO:0030136 clathrin-coated vesicle | GO:0016020 membrane |
orf19.6596	0.864501	0.792669	1.88223	0.221061		2.17725	Protein of unknown function; possibly transcriptionally regulated by Tac1p; transcriptionally activated by Mnl1p under weak acid stress; protein detected by mass spec in exponential and stationary phase cultures	GO:0046294 formaldehyde catabolic process |	GO:0004091 carboxylesterase activity | GO:0018738 S-formylglutathione hydrolase activity |	GO:0005829 cytosol |
orf19.6165	0.597418	0.024779	1.29894	0.646249	KGD1	2.17425	Protein described as 2-oxoglutarate dehydrogenase; regulated by Efg1p under yeast-form but not hyphal growth conditions; transcription is upregulated in an RHE model of oral candidiasis; detected by mass spec in stationary phase cultures	GO:0006099 tricarboxylic acid cycle | GO:0006103 2-oxoglutarate metabolic process |	GO:0004591 oxoglutarate dehydrogenase (succinyl-transferring) activity |	GO:0042645 mitochondrial nucleoid | GO:0009353 mitochondrial oxoglutarate dehydrogenase complex |
orf19.4132	0.935266	0.344402	2.03292	0.572186		2.17362	Predicted ORF in Assemblies 19, 20 and 21			GO:0005737 cytoplasm | GO:0005886 plasma membrane |
orf19.3637	0.935568	0.242941	2.03117	0.174761		2.17106	Predicted ORF in Assemblies 19, 20 and 21
orf19.4887	1.20533	0.397063	2.61515	0.184272	ECM21	2.16965	Protein not essential for viability; similar to S. cerevisiae Ecm21p (may have cell wall role); alkaline upregulated by Rim101p; fluconazole induced; caspofungin repressed; downregulated in azole-resistant strain overexpressing MDR1	GO:0007047 cell wall organization | GO:0006357 regulation of transcription from RNA polymerase II promoter |	GO:0031625 ubiquitin protein ligase binding |	GO:0005634 nucleus |
orf19.6117	0.497849	0.42633	1.07974	0.664523		2.16882	Predicted ORF in Assemblies 19, 20 and 21			GO:0005783 endoplasmic reticulum |
orf19.7127.1	0.698657	0.601868	1.51261	0.525118		2.16503	Putative protein of unknown function, transcription is upregulated in an RHE model of oral candidiasis; ORF Predicted by Annotation Working Group
orf19.733	0.441236	0.46083	0.949224	0.752224		2.15129	Predicted ORF in Assemblies 19, 20 and 21
orf19.5763	0.982178	0.924232	2.11198	0.0328199		2.1503	Predicted ORF in Assemblies 19, 20 and 21	GO:0009062 fatty acid catabolic process |	GO:0008670 2,4-dienoyl-CoA reductase (NADPH) activity |	GO:0005782 peroxisomal matrix |
orf19.2238	0.930258	0.466517	1.98871	0.470583	LTE1	2.1378	Protein similar to S. cerevisiae Lte1p; transcription is repressed in response to alpha pheromone in SpiderM medium	GO:0007049 cell cycle | GO:0042493 response to drug | GO:0016192 vesicle-mediated transport |	GO:0005085 guanyl-nucleotide exchange factor activity |	GO:0005933 cellular bud |
orf19.3131	0.549509	0.428699	1.16887	0.706535	OYE32	2.12711	Protein of NAD(P)H oxidoreductase family; induced by nitric oxide, amphotericin B, oxidative stress (via Cap1p); increased transcription associated with MDR1 overexpression or benomyl treatment; macrophage-downregulated protein abundance	GO:0045454 cell redox homeostasis |	GO:0003959 NADPH dehydrogenase activity |
orf19.3331	0.743557	0.290258	1.57731	0.536859	ABC1	2.12131	Protein described as ubiquinol-cytochrome-c reductase; induced upon adherence to polystyrene	GO:0006122 mitochondrial electron transport, ubiquinol to cytochrome c | GO:0006461 protein complex assembly | GO:0006744 ubiquinone biosynthetic process | GO:0009060 aerobic respiration |		GO:0005759 mitochondrial matrix |
orf19.4900	1.08198	0.274977	2.29128	0.170368		2.11767	Predicted ORF in Assemblies 19, 20 and 21	GO:0006491 N-glycan processing | GO:0006493 protein amino acid O-linked glycosylation |	GO:0000033 alpha-1,3-mannosyltransferase activity |	GO:0005794 Golgi apparatus |
orf19.6771	0.520544	0.347667	1.09887	0.626084	UBI4	2.111	Ubiquitin precursor (polyubiquitin), contains three tandem repeats of the ubiquitin peptide that are processed to individual units; transcription is induced by stress; mRNA found in yeast-form and mycelial cells at similar abundance	GO:0016567 protein ubiquitination | GO:0030447 filamentous growth | GO:0000902 cell morphogenesis | GO:0006950 response to stress | GO:0000209 protein polyubiquitination | GO:0006513 protein monoubiquitination | GO:0016579 protein deubiquitination |	GO:0031386 protein tag | GO:0005515 protein binding |	GO:0005737 cytoplasm | GO:0005886 plasma membrane |
orf19.428	0.621812	0.0915276	1.3124	0.348093		2.1106	Predicted ORF in Assemblies 19, 20 and 21; induced during planktonic growth		GO:0004672 protein kinase activity |
orf19.4380.1	0.679494	0.453588	1.43255	0.205726		2.10826	Predicted ORF in Assembly 20 and 21 (see Locus History)	GO:0000002 mitochondrial genome maintenance |		GO:0031305 integral to mitochondrial inner membrane |
orf19.6637	0.72937	0.723759	1.53433	0.603884		2.10364	Predicted ORF in Assemblies 19, 20 and 21
orf19.409	0.896149	0.924959	1.88421	0.371672		2.10257	Predicted membrane protein; similar to S. cerevisiae Ynr018Wp			GO:0016020 membrane | GO:0005739 mitochondrion | GO:0005886 plasma membrane |
orf19.3335	0.658872	0.399832	1.38409	0.364597		2.1007	Predicted ORF in Assemblies 19, 20 and 21; shows colony morphology-related gene regulation by Ssn6p; repressed by nitric oxide			GO:0005886 plasma membrane |
orf19.7215.3	0.674347	0.537659	1.416	0.741068		2.09981	ORF Predicted by Annotation Working Group	GO:0006461 protein complex assembly | GO:0042026 protein refolding |	GO:0051082 unfolded protein binding | GO:0051087 chaperone binding |	GO:0005759 mitochondrial matrix |
orf19.11	0.868934	0.33466	1.82165	0.328225		2.09642	Gene transcription regulated by Mig1p and Tup1p; possibly spurious ORF (Annotation Working Group prediction)
orf19.742	0.649412	0.505192	1.3568	0.368634	ALD6	2.08927	Putative aldehyde dehydrogenase; expression is regulated upon white-opaque switching; protein detected by mass spec in stationary phase cultures; transcription is upregulated in both intermediate and mature biofilms	GO:0006067 ethanol metabolic process |	GO:0004029 aldehyde dehydrogenase (NAD) activity |	GO:0005739 mitochondrion |
orf19.842	0.871087	0.0375728	1.81978	0.12857	ASR3	2.08909	Gene regulated by cAMP and by osmotic stress; greater mRNA abundance observed in a cyr1 or ras1 homozygous null mutant than in wild type; possibly spurious ORF (Annotation Working Group prediction)
orf19.6905	0.816364	0.586565	1.70317	0.404335		2.08628	Predicted ORF in Assemblies 19, 20 and 21
orf19.1738	1.279	0.791458	2.66727	0.22924	UGP1	2.08543	Protein similar to UTP-glucose-1-phosphaturidyl transferase; localizes to cell surface of yeast-form cells, but not hyphal cells; Hog1p-downregulated; protein detected by mass spec in stationary phase cultures	GO:0006486 protein amino acid glycosylation | GO:0006078 1,6-beta-glucan biosynthetic process | GO:0005978 glycogen biosynthetic process | GO:0006011 UDP-glucose metabolic process | GO:0005992 trehalose biosynthetic process |	GO:0003983 UTP |	GO:0030445 yeast-form cell wall | GO:0009986 cell surface | GO:0001950 plasma membrane enriched fraction | GO:0005737 cytoplasm |
orf19.5705	0.847349	0.758908	1.76391	0.389677	NAM2	2.08169	Putative mitochondrial leucyl-tRNA synthetase	GO:0032543 mitochondrial translation | GO:0006429 leucyl-tRNA aminoacylation | GO:0000372 Group I intron splicing |	GO:0004823 leucine-tRNA ligase activity | GO:0003729 mRNA binding |	GO:0005739 mitochondrion |
orf19.4602	0.757278	0.548911	1.57423	0.334934	MDH1-1	2.07879	Predicted malate dehydrogenase; macrophage-induced protein	GO:0006108 malate metabolic process | GO:0001302 replicative cell aging | GO:0001300 chronological cell aging | GO:0006099 tricarboxylic acid cycle |	GO:0004470 malic enzyme activity | GO:0030060 L-malate dehydrogenase activity |	GO:0005759 mitochondrial matrix |
orf19.5288	2.47431	0.147622	5.13021	0.332473	IFE2	2.07339	Protein described as an alcohol dehydrogenase; decreased expression in hyphae compared to yeast-form cells; Efg1p-regulated; fluconazole-induced; Hog1p-induced; increased expression in response to prostaglandins	GO:0019650 glucose catabolic process to butanediol |	GO:0000721 (R,R)-butanediol dehydrogenase activity |	GO:0005737 cytoplasm |
orf19.7531	0.433703	0.472691	0.898091	0.752301		2.07075	Predicted ORF in Assemblies 19, 20 and 21; transcription is induced upon yeast-hyphal transition; benomyl or caspofungin induced; protein detected by mass spec in stationary phase cultures			GO:0005737 cytoplasm |
orf19.1349	0.876281	0.0474758	1.80987	0.00479738		2.0654	Predicted ORF in Assemblies 19, 20 and 21; possibly spurious ORF (Annotation Working Group prediction)
orf19.4943	0.964724	0.804609	1.9921	0.32481	PSA2	2.06494	Predicted ORF in Assemblies 19, 20 and 21; macrophage-downregulated gene; protein detected by mass spec in stationary phase cultures	GO:0000032 cell wall mannoprotein biosynthetic process | GO:0009298 GDP-mannose biosynthetic process |	GO:0004475 mannose-1-phosphate guanylyltransferase activity |	GO:0005737 cytoplasm |
orf19.2333	0.98117	0.981177	2.02522	0.56182		2.06409	Predicted ORF in Assemblies 19, 20 and 21			GO:0005737 cytoplasm |
orf19.1473	0.358308	0.552985	0.739343	0.531753		2.06343	Predicted ORF in Assemblies 19, 20 and 21; transcription is induced in response to alpha pheromone in SpiderM medium
orf19.1381	0.934693	0.868069	1.92647	0.0158017		2.06108	Predicted ORF in Assemblies 19, 20 and 21	GO:0006897 endocytosis | GO:0007015 actin filament organization |		GO:0005938 cell cortex |
orf19.6773	0.519617	0.0960569	1.07048	0.734792	ECM29	2.06013	Protein similar to S. cerevisiae Ecm29p; transposon mutation affects filamentous growth	GO:0030447 filamentous growth | GO:0007047 cell wall organization |	GO:0005515 protein binding |	GO:0000502 proteasome complex | GO:0005634 nucleus | GO:0005737 cytoplasm |
orf19.744	0.530425	0.484698	1.09103	0.8591	GDB1	2.0569	Putative glycogen debranching enzyme; expression is regulated upon white-opaque switching; regulated by Nrg1p, Tup1p	GO:0005980 glycogen catabolic process |	GO:0004133 glycogen debranching enzyme activity | GO:0004135 amylo-alpha-1,6-glucosidase activity | GO:0004134 4-alpha-glucanotransferase activity |	GO:0005739 mitochondrion |
orf19.7566	0.451685	0.579634	0.926971	0.965103		2.05225	Putative protein of unknown function, transcription is upregulated in clinical isolates from HIV+ patients with oral candidiasis; alkaline upregulated by Rim101p; fungal-specific (no human or murine homolog)	GO:0006865 amino acid transport |	GO:0015171 amino acid transmembrane transporter activity |	GO:0005886 plasma membrane |
orf19.6763	0.888444	0.780022	1.8213	0.0892099	SLK19	2.04999	Alkaline-induced protein of plasma membrane; affects cell aggregation, cell wall; similar to S. cerevisiae Slk19p (a kinetochore protein with roles in mitosis, meiosis); required for wild-type virulence in mouse; macrophage-downregulated	GO:0007047 cell wall organization | GO:0009405 pathogenesis | GO:0009268 response to pH | GO:0030472 mitotic spindle organization in nucleus | GO:0007126 meiosis |		GO:0016021 integral to membrane | GO:0005887 integral to plasma membrane | GO:0000775 chromosome, centromeric region | GO:0045121 membrane raft | GO:0005737 cytoplasm |
orf19.4669	0.508265	0.268082	1.0416	0.868093	AAT22	2.04933	Protein not essential for viability; similar to S. cerevisiae Aat2p, which is an aspartate aminotransferase involved in nitrogen metabolism; clade-associated gene expression; protein level decreased in stationary phase cultures	GO:0006536 glutamate metabolic process | GO:0006533 aspartate catabolic process |	GO:0004069 L-aspartate |	GO:0005777 peroxisome |
orf19.2078	0.850292	0.0458883	1.73955	0.05323		2.04583	Predicted ORF in Assemblies 19, 20 and 21	GO:0006896 Golgi to vacuole transport |	GO:0030276 clathrin binding |	GO:0030121 AP-1 adaptor complex |
orf19.3934	0.913741	0.820204	1.86725	0.244662	CAR1	2.04352	Transcription is regulated by Nrg1p, Mig1p, and Tup1p; shows colony morphology-related gene regulation by Ssn6p; alkaline upregulated; protein level decreased in stationary phase cultures	GO:0019547 arginine catabolic process to ornithine |	GO:0004053 arginase activity | GO:0030145 manganese ion binding | GO:0008270 zinc ion binding |	GO:0043332 mating projection tip |
orf19.1664	0.697202	0.533452	1.42437	0.35922		2.04298	Predicted ORF in Assemblies 19, 20 and 21; decreased expression observed in an ssr1 homozygous null mutant
orf19.345	0.515688	0.203113	1.0505	0.544985		2.03709	Predicted ORF in Assemblies 19, 20 and 21	GO:0006540 glutamate decarboxylation to succinate | GO:0009450 gamma-aminobutyric acid catabolic process | GO:0006979 response to oxidative stress |	GO:0009013 succinate-semialdehyde dehydrogenase [NAD(P)+] activity |	GO:0005737 cytoplasm |
orf19.6706	0.689921	0.579462	1.40419	0.0128595	GYP7	2.03529	Predicted ORF in Assemblies 19, 20 and 21; similar to S. cerevisiae Gyp7p (GTPase-activating protein for Ypt1p); caspofungin-induced	GO:0016192 vesicle-mediated transport |	GO:0005097 Rab GTPase activator activity |	GO:0005737 cytoplasm |
orf19.4054	0.795653	0.52642	1.61368	0.232658	CTA24	2.02813	Putative transcriptional activator, downregulated by Efg1p; member of a family of telomere-proximal genes; transcription is upregulated in an RHE model of oral candidiasis	GO:0045893 positive regulation of transcription, DNA-dependent |	GO:0016563 transcription activator activity |
orf19.2747	0.928064	0.798771	1.87927	0.134067	RGT1	2.02493	Transcriptional repressor involved in the regulation of glucose transporter genes; has zinc-cluster; similar to S. cerevisiae Rgt1p	GO:0006006 glucose metabolic process | GO:0030447 filamentous growth |	GO:0003702 RNA polymerase II transcription factor activity | GO:0003677 DNA binding | GO:0003714 transcription corepressor activity | GO:0016563 transcription activator activity |
orf19.2769	0.590627	0.550396	1.19475	0.325269		2.02284	Predicted ORF in Assemblies 19, 20 and 21; hyphal-induced expression; greater mRNA abundance observed in a cyr1 or ras1 homozygous null mutant than in wild type	GO:0030162 regulation of proteolysis | GO:0042144 vacuole fusion, non-autophagic |	GO:0004866 endopeptidase inhibitor activity |	GO:0000324 fungal-type vacuole |
orf19.2655	0.9919	0.982383	2.00126	0.0130813	BUB3	2.0176	Protein similar to S. cerevisiae Bub3p, which is a kinetochore checkpoint component; induced under hydroxyurea treatment	GO:0007094 mitotic cell cycle spindle assembly checkpoint |		GO:0033597 mitotic checkpoint complex | GO:0000778 condensed nuclear chromosome kinetochore |
orf19.1852	0.670785	0.60871	1.35033	0.21408		2.01306	Predicted ORF in Assemblies 19, 20 and 21
orf19.5514	0.891299	0.528199	1.79297	0.251436		2.01164	Predicted ORF in Assemblies 19, 20 and 21
orf19.3919	0.703735	0.338627	1.41539	0.0611321		2.01125	Predicted ORF in Assemblies 19, 20 and 21	GO:0000022 mitotic spindle elongation | GO:0000070 mitotic sister chromatid segregation |	GO:0004197 cysteine-type endopeptidase activity |	GO:0005819 spindle | GO:0005634 nucleus | GO:0005737 cytoplasm |
orf19.2870	0.942214	0.8426	1.89245	0.0336605		2.00851	Predicted ORF in Assemblies 19, 20 and 21
orf19.4998	1.37407	0.0337438	2.75455	0.160822		2.00466	Predicted ORF in Assemblies 19, 20 and 21; caspofungin repressed	GO:0006355 regulation of transcription, DNA-dependent | GO:0009063 cellular amino acid catabolic process |	GO:0003700 transcription factor activity |	GO:0005634 nucleus |
orf19.318	0.800993	0.106061	1.60554	0.0213007		2.00444	Predicted ORF in Assemblies 19, 20 and 21	GO:0016226 iron-sulfur cluster assembly |		GO:0005759 mitochondrial matrix |
orf19.2665	0.669298	0.356959	1.34031	0.437736	MSN5	2.00255	Predicted ORF in Assemblies 19, 20 and 21	GO:0006611 protein export from nucleus |	GO:0008262 importin-alpha export receptor activity |	GO:0005634 nucleus |
orf19.921	0.792676	0.631585	1.5873	0.641793		2.00245	Predicted ORF in Assemblies 19, 20 and 21
orf19.4192	1.01754	0.841083	2.02834	0.000806849	CDC14	1.99338	Protein involved in exit from mitosis and morphogenesis; ortholog of S. cerevisiae Cdc14p, which is a dual-specificity phosphatase and cell-cycle regulator; suppresses S. cerevisiae cdc15-lyt1, dbf2-2, and (partially) tem1 mutant phenotypes	GO:0007067 mitosis | GO:0006261 DNA-dependent DNA replication | GO:0030448 hyphal growth | GO:0001403 invasive growth in response to glucose limitation | GO:0007096 regulation of exit from mitosis | GO:0000920 cell separation during cytokinesis | GO:0007000 nucleolus organization | GO:0006470 protein amino acid dephosphorylation |	GO:0008138 protein tyrosine/serine/threonine phosphatase activity |	GO:0005634 nucleus | GO:0005730 nucleolus | GO:0030428 cell septum | GO:0005816 spindle pole body | GO:0030869 RENT complex |
orf19.868	0.821974	0.284227	1.63847	0.321928	ADAEC	1.99334	Transcription is specific to white cell type
orf19.4187	0.887308	0.696542	1.76697	0.271762		1.99139	Predicted ORF in Assemblies 19, 20 and 21	GO:0000001 mitochondrion inheritance | GO:0045040 protein import into mitochondrial outer membrane | GO:0000002 mitochondrial genome maintenance |		GO:0032865 Mdm10/Mdm12/Mmm1 complex |
orf19.4997	0.874343	0.623241	1.73653	0.413783	KIS2	1.9861	Scaffold protein of Snf1p complex; similar to S. cerevisiae Gal83p and Sip2p; interacts with Snf4p; interaction with Snf1p complex is regulated by carbon source, decreased on ethanol; N-terminal myristoylation; Hog1p-downregulated	GO:0006468 protein amino acid phosphorylation | GO:0007165 signal transduction | GO:0006109 regulation of carbohydrate metabolic process |	GO:0004679 AMP-activated protein kinase activity | GO:0030159 receptor signaling complex scaffold activity |	GO:0005634 nucleus | GO:0031225 anchored to membrane |
orf19.1042	0.819689	0.6863	1.62684	0.473135	POR1	1.9847	Mitochondrial outer membrane porin; in detergent-resistant membrane fraction (possible lipid raft component); antigenic in human, mouse; flucytosine-, macrophage-, farnesol- induced; fluconazole, caspofungin repressed	GO:0007005 mitochondrion organization | GO:0009060 aerobic respiration | GO:0006811 ion transport |	GO:0008308 voltage-gated anion channel activity |	GO:0005624 membrane fraction | GO:0031307 integral to mitochondrial outer membrane | GO:0005886 plasma membrane |
orf19.6544	0.874067	0.626483	1.7337	0.0998115	LPI9	1.98349	Predicted ORF in Assemblies 19, 20 and 21	GO:0007059 chromosome segregation | GO:0043666 regulation of phosphoprotein phosphatase activity |	GO:0008157 protein phosphatase 1 binding | GO:0008599 protein phosphatase type 1 regulator activity |	GO:0005739 mitochondrion | GO:0005840 ribosome | GO:0005783 endoplasmic reticulum |
orf19.5073	0.815797	0.661119	1.6079	0.251771	DPM1	1.97096	Protein with similarity to S. cerevisiae Dpm1p, which is dolichol phosphate mannose synthase; filament induced; Tup1p-regulated	GO:0006493 protein amino acid O-linked glycosylation | GO:0006487 protein amino acid N-linked glycosylation | GO:0006506 GPI anchor biosynthetic process |	GO:0004582 dolichyl-phosphate beta-D-mannosyltransferase activity |	GO:0005783 endoplasmic reticulum | GO:0005886 plasma membrane |
orf19.7053	0.430946	0.497463	0.84892	0.854966	GAC1	1.9699	Protein described as similar to regulatory subunit of serine/threonine phosphoprotein phosphatase 1; fluconazole-induced; caspofungin repressed; transcriptionally activated by Mnl1p under weak acid stress; regulated by Nrg1p, Tup1p	GO:0009408 response to heat | GO:0000122 negative regulation of transcription from RNA polymerase II promoter | GO:0007094 mitotic cell cycle spindle assembly checkpoint | GO:0007126 meiosis | GO:0005977 glycogen metabolic process | GO:0005979 regulation of glycogen biosynthetic process |	GO:0008599 protein phosphatase type 1 regulator activity |	GO:0000164 protein phosphatase type 1 complex |
orf19.6337	0.766232	0.525616	1.50656	0.151406	TLO13	1.9662	Member of a family of telomere-proximal genes of unknown function; may be spliced in vivo; overlaps orf19.6337.1, which is a region annotated as blocked reading frame
orf19.2839	0.962014	0.621766	1.891	0.0493519	CIRT4B	1.96566	Decreased transcription is observed in an azole-resistant strain that overexpresses CDR1 and CDR2
orf19.4379	0.783302	0.520741	1.53861	0.0217199	PRP13	1.96427	Predicted ORF in Assemblies 19, 20 and 21; fungal-specific (no human or murine homolog)	GO:0006364 rRNA processing | GO:0000002 mitochondrial genome maintenance |	GO:0004527 exonuclease activity |	GO:0005743 mitochondrial inner membrane |
orf19.5278	0.614606	0.483525	1.20707	0.209776		1.96398	Predicted ORF in Assemblies 19, 20 and 21			GO:0005739 mitochondrion |
orf19.2047	0.892188	0.572078	1.7503	0.284415		1.9618	Predicted ORF in Assemblies 19, 20 and 21; mutation confers hypersensitivity to toxic ergosterol analog, and to amphotericin B	GO:0042493 response to drug |		GO:0005634 nucleus | GO:0005737 cytoplasm |
orf19.3508	0.551659	0.531461	1.07823	0.902465		1.95453	Predicted ORF in Assemblies 19, 20 and 21; protein detected by mass spec in stationary phase cultures			GO:0005737 cytoplasm |
orf19.2531	1.3777	0.270358	2.69151	0.36181	CSP37	1.95363	Plasma membrane, hyphal cell wall protein; role in progression of murine systemic infection; predicted P-loop, divalent cation binding, N-glycosylation sites; expressed in yeast and hyphae; hyphal downregulated; lacks S. cerevisiae homolog	GO:0009405 pathogenesis | GO:0006461 protein complex assembly | GO:0006888 ER to Golgi vesicle-mediated transport |		GO:0016021 integral to membrane | GO:0005886 plasma membrane | GO:0009986 cell surface | GO:0005624 membrane fraction | GO:0030446 hyphal cell wall | GO:0005625 soluble fraction |
orf19.3198	0.635721	0.354791	1.23759	0.584607	OBPA	1.94675	Similar to oxysterol binding protein; gene is located within the MTLa mating-type-like locus; Plc1p-regulated	GO:0006694 steroid biosynthetic process | GO:0045324 late endosome to vacuole transport | GO:0016125 sterol metabolic process | GO:0006897 endocytosis | GO:0006887 exocytosis | GO:0015918 sterol transport | GO:0030011 maintenance of cell polarity |	GO:0008142 oxysterol binding | GO:0005498 sterol carrier activity |	GO:0005625 soluble fraction | GO:0005737 cytoplasm |
orf19.6621	1.04239	0.835103	2.02874	0.123961	MHP1	1.94623	Protein similar to S. cerevisiae Mhp1p, which is involved in microtubule stabilization; transposon mutation affects filamentous growth; possibly transcriptionally regulated upon hyphal formation	GO:0030447 filamentous growth | GO:0007026 negative regulation of microtubule depolymerization | GO:0007047 cell wall organization |	GO:0005200 structural constituent of cytoskeleton |	GO:0005874 microtubule |
orf19.7214	0.884742	0.741775	1.72074	0.475065		1.9449	Similar to glucan 1,3-beta-glucosidase; regulated by Nrg1p, Tup1p; possibly regulated by Tac1p; induced upon biofilm formation; induced by nitric oxide; induced during cell wall regeneration; detected by mass spec in stationary phase			GO:0005737 cytoplasm |
orf19.4504	0.614122	0.507088	1.19141	0.391048		1.94002	Predicted ORF in Assemblies 19, 20 and 21	GO:0006113 fermentation |	GO:0004022 alcohol dehydrogenase (NAD) activity |	GO:0005829 cytosol |
orf19.1616	1.10479	0.0482266	2.13758	0.461018	FGR23	1.93483	Protein lacking an ortholog in S. cerevisiae; transposon mutation affects filamentous growth; transcriptionally repressed by A1p and Alpha2p in white-phase cells, a-specific and induced by alpha factor	GO:0030447 filamentous growth |		GO:0009986 cell surface |
orf19.3811	0.759523	0.718638	1.46753	0.0143546	GYP1	1.93218	Transcription is regulated by Nrg1p, Mig1p, and Tup1p	GO:0016192 vesicle-mediated transport |	GO:0005097 Rab GTPase activator activity |	GO:0005739 mitochondrion | GO:0005794 Golgi apparatus |
orf19.2803	1.53171	0.321892	2.95944	0.0105539	HEM13	1.93211	Coproporphyrinogen III oxidase; antigenic in human, mouse; localizes to yeast-form cell surface, not hyphae; soluble in hyphae; iron-regulated expression; macrophage-downregulated protein; not Rfg1p regulated, farnesol-induced	GO:0006783 heme biosynthetic process |	GO:0004109 coproporphyrinogen oxidase activity |	GO:0030445 yeast-form cell wall | GO:0009986 cell surface | GO:0005625 soluble fraction | GO:0005743 mitochondrial inner membrane | GO:0005829 cytosol |
orf19.5614	0.687818	0.35891	1.32825	0.0221255		1.93111	Predicted ORF in Assemblies 19, 20 and 21	GO:0006260 DNA replication | GO:0006401 RNA catabolic process | GO:0007047 cell wall organization |	GO:0004523 ribonuclease H activity |	GO:0005623 cell |
orf19.2770.1	0.686942	0.744066	1.32384	0.550917	SOD1	1.92715	Cytosolic copper- and zinc-containing superoxide dismutase, involved in protection from oxidative stress and required for full virulence; alkaline upregulated by Rim101p; upregulated in the presence of human blood	GO:0009405 pathogenesis | GO:0006979 response to oxidative stress | GO:0030448 hyphal growth | GO:0006801 superoxide metabolic process | GO:0001320 age-dependent response to reactive oxygen species during chronological cell aging | GO:0051091 positive regulation of transcription factor activity | GO:0006878 cellular copper ion homeostasis | GO:0042493 response to drug | GO:0006882 cellular zinc i…	GO:0004784 superoxide dismutase activity |	GO:0005829 cytosol | GO:0005634 nucleus | GO:0005758 mitochondrial intermembrane space |
orf19.5619	1.07219	0.214075	2.06567	0.326864		1.92658	Predicted ORF in Assemblies 19, 20 and 21; transcription is induced in response to alpha pheromone in SpiderM medium
orf19.2866	1.10335	0.69663	2.12287	0.47773		1.92402	Predicted ORF in Assemblies 19, 20 and 21
orf19.7325	1.09002	0.411705	2.09574	0.153489		1.92266	Predicted ORF in Assemblies 19, 20 and 21	GO:0006825 copper ion transport | GO:0006461 protein complex assembly |	GO:0005507 copper ion binding |	GO:0005743 mitochondrial inner membrane | GO:0005886 plasma membrane |
orf19.5404	1.17667	0.484019	2.26173	0.489508	FLO9	1.92215	Protein repressed during the mating process
orf19.6062	0.789189	0.212511	1.51659	0.368653		1.92171	Predicted ORF in Assemblies 19, 20 and 21	GO:0000002 mitochondrial genome maintenance |		GO:0005886 plasma membrane |
orf19.1048	1.06046	0.175151	2.02945	0.30382	IFD6	1.91375	Aldo-keto reductase family member; similar to aryl alcohol dehydrogenases, S. cerevisiae Ypl088wp; increased protein correlates with MDR1 overexpression (but not CDR1 or CDR2) in fluconazole-resistant clinical isolates; farnesol regulated	GO:0006081 cellular aldehyde metabolic process | GO:0042710 biofilm formation |	GO:0018456 aryl-alcohol dehydrogenase activity |
orf19.6196	0.905035	0.534713	1.72988	0.161758		1.9114	Predicted ORF in Assemblies 19, 20 and 21; possibly spurious ORF (Annotation Working Group prediction)
orf19.6160	0.91966	0.438515	1.75527	0.41298		1.9086	Predicted ORF in Assemblies 19, 20 and 21			GO:0045121 membrane raft | GO:0005739 mitochondrion |
orf19.2846	1.04893	0.479602	2.00069	0.218295		1.90737	Predicted ORF in Assemblies 19, 20 and 21; induced in core caspofungin response; transcription regulated upon yeast-hyphal switch
orf19.3546	0.714432	0.504783	1.36238	0.509282		1.90694	Predicted ORF in Assemblies 19, 20 and 21	GO:0016558 protein import into peroxisome matrix |	GO:0005515 protein binding |	GO:0005778 peroxisomal membrane |
orf19.6225.1	0.936663	0.506753	1.78392	0.076931		1.90455	ORF Predicted by Annotation Working Group	GO:0033617 mitochondrial respiratory chain complex IV assembly |		GO:0005743 mitochondrial inner membrane | GO:0005739 mitochondrion |
orf19.5828	0.635075	0.447154	1.20937	0.837345		1.90429	Predicted ORF in Assemblies 19, 20 and 21	GO:0006376 mRNA splice site selection |	GO:0031202 RNA splicing factor activity, transesterification mechanism | GO:0003729 mRNA binding |	GO:0000243 commitment complex |
orf19.7286	0.630376	0.0109775	1.19971	0.553056	RPN7	1.90317	Predicted ORF in Assemblies 19, 20 and 21; regulated by Gcn2p and Gcn4p; protein detected by mass spec in exponential and stationary phase cultures	GO:0006511 ubiquitin-dependent protein catabolic process |	GO:0004175 endopeptidase activity | GO:0005198 structural molecule activity |	GO:0008541 proteasome regulatory particle, lid subcomplex | GO:0005634 nucleus |
orf19.6486	0.924264	0.507251	1.75717	0.281698	LDG3	1.90115	Predicted ORF in Assemblies 19, 20 and 21; induced upon biofilm formation
orf19.2701	1.01173	0.560905	1.92207	0.192933		1.89978	Predicted ORF in Assemblies 19, 20 and 21; greater mRNA abundance observed in a cyr1 or ras1 homozygous null mutant than in wild type
orf19.26	0.596734	0.0663324	1.13237	0.579396		1.89761	Predicted ORF in Assemblies 19, 20 and 21; induced by nitric oxide in yhb1 mutant	GO:0006517 protein deglycosylation | GO:0006515 misfolded or incompletely synthesized protein catabolic process |	GO:0000224 peptide-N4-(N-acetyl-beta-glucosaminyl)asparagine amidase activity |	GO:0005829 cytosol | GO:0005739 mitochondrion | GO:0005634 nucleus |
orf19.1078	1.27758	0.632118	2.41936	0.00439976	HBR2	1.89371	Uncharacterized protein, regulated by Gcn4p and hemoglobin; protein detected by mass spec in stationary phase cultures	GO:0019265 glycine biosynthetic process, by transamination of glyoxylate |	GO:0008453 alanine-glyoxylate transaminase activity |	GO:0005739 mitochondrion |
orf19.3074	0.672891	0.656278	1.27416	0.772144	TLO10	1.89356	Member of a family of telomere-proximal genes of unknown function
orf19.4157	0.672201	0.0257726	1.27285	0.112169	SPS20	1.89355	Predicted ORF in Assemblies 19, 20 and 21; protein detected by mass spec in stationary phase cultures
orf19.1300	1.0059	0.985815	1.90087	0.410052		1.88973	Predicted ORF in Assemblies 19, 20 and 21			GO:0005740 mitochondrial envelope |
orf19.5323	0.903248	0.931835	1.70027	0.361858	MDH1-3	1.88239	Predicted malate dehydrogenase; farnesol regulated	GO:0006108 malate metabolic process | GO:0006097 glyoxylate cycle | GO:0006635 fatty acid beta-oxidation | GO:0006735 NADH regeneration |	GO:0004470 malic enzyme activity |	GO:0005782 peroxisomal matrix |
orf19.6447	0.902263	0.710582	1.69775	0.405754	ARF1	1.88165	ADP-ribosylation factor, probable GTPase involved in intracellular transport; one of several C. albicans ADP-ribosylation factors; N-myristoylprotein; substrate of Nmt1p	GO:0006891 intra-Golgi vesicle-mediated transport | GO:0006888 ER to Golgi vesicle-mediated transport |	GO:0003924 GTPase activity | GO:0005525 GTP binding |	GO:0005829 cytosol | GO:0005798 Golgi-associated vesicle |
orf19.7276.1	0.703616	0.600562	1.32086	0.457498	TLO4	1.87724	Member of a family of telomere-proximal genes of unknown function; transcription is upregulated in an RHE model of oral candidiasis
orf19.1534	1.30817	0.634975	2.44998	0.200191		1.87283	Protein similar to S. cerevisiae Zrt3p, which is a transporter of zinc ions; predicted Kex2p substrate	GO:0006829 zinc ion transport | GO:0006882 cellular zinc ion homeostasis |	GO:0005385 zinc ion transmembrane transporter activity |	GO:0005774 vacuolar membrane |
orf19.3156	0.99249	0.948434	1.85819	0.556157		1.87225	Predicted ORF in Assemblies 19, 20 and 21; transcriptionally activated by Mnl1p under weak acid stress
orf19.6313.2	0.860754	0.599273	1.61062	0.242982		1.87118	ORF Predicted by Annotation Working Group
orf19.102	0.763489	0.305317	1.42843	0.0493653		1.87093	Predicted ORF in Assemblies 19, 20 and 21; possibly spurious ORF (Annotation Working Group prediction)	GO:0007064 mitotic sister chromatid cohesion |		GO:0008278 cohesin complex |
orf19.1413	1.01131	0.883681	1.88553	0.0490305	YFH1	1.86445	Frataxin; homolog of S. cerevisiae Yfh1p, mammalian frataxin; may be required for iron storage or delivery; role in oxidative stress resistance; transcription regulated by Nrg1p, repressed if iron absent, induced by macrophage interaction	GO:0006979 response to oxidative stress | GO:0006879 cellular iron ion homeostasis | GO:0006749 glutathione metabolic process | GO:0016226 iron-sulfur cluster assembly |	GO:0034986 iron chaperone activity | GO:0004322 ferroxidase activity | GO:0008198 ferrous iron binding |	GO:0005759 mitochondrial matrix |
orf19.326	0.886193	0.655446	1.65073	0.00247856		1.86272	Predicted ORF in Assemblies 19, 20 and 21			GO:0005739 mitochondrion |
orf19.297	0.727683	0.621886	1.35433	0.257281	DTD2	1.86116	Predicted ORF in Assemblies 19, 20 and 21	GO:0019478 D-amino acid catabolic process |	GO:0051500 D-tyrosyl-tRNA(Tyr) deacylase activity |	GO:0005737 cytoplasm |
orf19.1254	0.784338	0.218844	1.4555	0.368875	SEC23	1.85571	Transcription is regulated upon yeast-hyphal switch	GO:0006914 autophagy | GO:0006888 ER to Golgi vesicle-mediated transport | GO:0030433 ER-associated protein catabolic process |	GO:0005096 GTPase activator activity |	GO:0030127 COPII vesicle coat | GO:0005737 cytoplasm |
orf19.5340	0.651921	0.00712209	1.20935	0.550021		1.85505	Predicted ORF in Assemblies 19, 20 and 21	GO:0006888 ER to Golgi vesicle-mediated transport |	GO:0005097 Rab GTPase activator activity |	GO:0005934 cellular bud tip | GO:0005829 cytosol | GO:0005625 soluble fraction | GO:0005624 membrane fraction | GO:0005798 Golgi-associated vesicle | GO:0005935 cellular bud neck | GO:0005886 plasma membrane | GO:0000131 incipient cellular bud site |
orf19.3656	1.2445	0.109525	2.30773	0.476667	COX15	1.85434	Transcription is regulated by Nrg1p and Tup1p; alkaline downregulated	GO:0008535 respiratory chain complex IV assembly | GO:0006784 heme a biosynthetic process |	GO:0016653 oxidoreductase activity, acting on NADH or NADPH, heme protein as acceptor |	GO:0005743 mitochondrial inner membrane | GO:0005886 plasma membrane |
orf19.2699	0.60494	0.566812	1.12149	0.870802	ABP1	1.85389	Protein similar to S. cerevisiae Abp1p, which is an actin-binding protein of the cortical actin cytoskeleton; caspofungin induced; protein detected by mass spec in stationary phase cultures	GO:0030010 establishment of cell polarity | GO:0000147 actin cortical patch assembly |	GO:0003779 actin binding | GO:0005515 protein binding |	GO:0005856 cytoskeleton | GO:0030427 site of polarized growth | GO:0043332 mating projection tip | GO:0005938 cell cortex |
orf19.2006.1	0.906228	0.731556	1.67852	0.508808	COX17	1.8522	ORF predicted by Annotation Working Group; transcription is upregulated in both intermediate and mature biofilms	GO:0033617 mitochondrial respiratory chain complex IV assembly | GO:0015680 intracellular copper ion transport |	GO:0005375 copper ion transmembrane transporter activity | GO:0016531 copper chaperone activity |	GO:0005829 cytosol | GO:0005758 mitochondrial intermembrane space |
orf19.3139	1.00137	0.986675	1.85329	0.416828		1.85076	Predicted ORF in Assemblies 19, 20 and 21; increased transcription is observed upon benomyl treatment; oxidative stress-induced via Cap1p
orf19.6255	0.736493	0.058246	1.36219	0.111076		1.84956	Predicted ORF in Assemblies 19, 20 and 21			GO:0005737 cytoplasm |
orf19.4599	0.636013	0.397157	1.17606	0.804933	PHO89	1.84911	Putative phosphate permease; expression is regulated upon white-opaque switching; alkaline upregulated by Rim101p; induced upon biofilm formation; possibly adherence-induced	GO:0006817 phosphate transport | GO:0006796 phosphate metabolic process | GO:0055085 transmembrane transport |	GO:0048249 high affinity phosphate transmembrane transporter activity | GO:0015319 sodium |	GO:0005886 plasma membrane |
orf19.729.1	0.668583	0.00758855	1.23575	0.0135913	RGD3	1.84831	Putative Rho GTPase activating protein; fungal-specific (no human or murine homolog)
orf19.3507	0.791152	0.790376	1.45621	0.475041	MCR1	1.84063	Protein described as NADH-cytochrome-b5 reductase; soluble protein in hyphae; biofilm induced; alkaline downregulated; ketoconazole or flucytosine induced, farnesol-induced	GO:0006979 response to oxidative stress | GO:0006696 ergosterol biosynthetic process |	GO:0004128 cytochrome-b5 reductase activity |	GO:0005625 soluble fraction | GO:0031307 integral to mitochondrial outer membrane | GO:0005758 mitochondrial intermembrane space |
orf19.7386	1.14775	0.573585	2.11255	0.0851101		1.8406	Predicted ORF in Assemblies 19, 20 and 21	GO:0032979 protein insertion into mitochondrial membrane from inner side | GO:0009060 aerobic respiration | GO:0007007 inner mitochondrial membrane organization |	GO:0043022 ribosome binding |	GO:0005743 mitochondrial inner membrane |
orf19.1299	0.697389	0.198441	1.28194	0.462906	RPN6	1.8382	Predicted ORF in Assemblies 19, 20 and 21; regulated by Gcn2p and Gcn4p	GO:0043248 proteasome assembly | GO:0006511 ubiquitin-dependent protein catabolic process |	GO:0004175 endopeptidase activity | GO:0005198 structural molecule activity |	GO:0008541 proteasome regulatory particle, lid subcomplex | GO:0034515 proteasome storage granule |
orf19.4220	0.811434	0.36594	1.4877	0.536493		1.83342	Predicted ORF in Assemblies 19, 20 and 21; regulated by Gcn4p; repressed in response to amino acid starvation (3-aminotriazole treatment)			GO:0005737 cytoplasm |
orf19.6987	0.835238	0.2784	1.52892	0.365024	DNM1	1.83052	Putative protein of unknown function; ; transcription is upregulated in an RHE model of oral candidiasis; transcription is regulated by Nrg1p, Mig1p, and Tup1p	GO:0000001 mitochondrion inheritance | GO:0000266 mitochondrial fission | GO:0051260 protein homooligomerization | GO:0001300 chronological cell aging | GO:0007031 peroxisome organization |	GO:0042803 protein homodimerization activity | GO:0003924 GTPase activity |	GO:0005777 peroxisome | GO:0005741 mitochondrial outer membrane |
orf19.3086	0.632382	0.0457756	1.1575	0.531234		1.83038	Predicted ORF in Assemblies 19, 20 and 21	GO:0007121 bipolar cellular bud site selection | GO:0006906 vesicle fusion | GO:0048278 vesicle docking | GO:0006893 Golgi to plasma membrane transport |	GO:0005515 protein binding |	GO:0030478 actin cap | GO:0043332 mating projection tip | GO:0000145 exocyst |
orf19.4551	0.823931	0.590848	1.508	0.281943	CTN1	1.83025	Predicted carnitine acetyl transferase; required for growth on nonfermentable carbon sources but not for hyphal growth or virulence in mouse systemic model; transcription induced in macrophage; macrophage/pseudohyphal-repressed after 16 hr	GO:0006084 acetyl-CoA metabolic process | GO:0045333 cellular respiration | GO:0009437 carnitine metabolic process | GO:0006066 alcohol metabolic process |	GO:0004092 carnitine O-acetyltransferase activity |	GO:0005741 mitochondrial outer membrane |
orf19.6126	0.891667	0.650822	1.63151	0.00167301	KGD2	1.82973	Protein described as dihydrolipoamide S-succinyltransferase; transcriptionally regulated by iron; expression greater in high iron	GO:0006099 tricarboxylic acid cycle | GO:0006103 2-oxoglutarate metabolic process |	GO:0030523 dihydrolipoamide S-acyltransferase activity | GO:0004149 dihydrolipoyllysine-residue succinyltransferase activity |	GO:0042645 mitochondrial nucleoid | GO:0009353 mitochondrial oxoglutarate dehydrogenase complex |
orf19.4947	0.814537	0.684281	1.49009	0.667026		1.82937	Predicted ORF in Assemblies 19, 20 and 21			GO:0005741 mitochondrial outer membrane | GO:0005886 plasma membrane |
orf19.4114	0.723412	0.410626	1.3231	0.0229695	FAA2-1	1.82897	Predicted long chain fatty acid CoA ligase; upregulated upon phagocytosis; induced by nitric oxide in yhb1 mutant	GO:0006629 lipid metabolic process | GO:0006499 N-terminal protein myristoylation |	GO:0004467 long-chain-fatty-acid-CoA ligase activity |	GO:0005777 peroxisome |
orf19.5953	1.07517	0.655644	1.96457	0.0837564		1.82722	Predicted ORF in Assemblies 19, 20 and 21	GO:0042254 ribosome biogenesis | GO:0008361 regulation of cell size | GO:0006383 transcription from RNA polymerase III promoter |	GO:0003700 transcription factor activity | GO:0043565 sequence-specific DNA binding |	GO:0005634 nucleus | GO:0005737 cytoplasm |
orf19.5215	0.840487	0.00900295	1.53548	0.234796	TES15	1.82689	Predicted ORF in Assemblies 19, 20 and 21	GO:0006631 fatty acid metabolic process |
orf19.6214	0.853067	0.522568	1.55644	0.46682	ATC1	1.82452	Cell wall acid trehalase; catalyzes hydrolysis of the disaccharide trehalose; similar to S. cerevisiae vacuolar acid trehalase (Ath1p)	GO:0005993 trehalose catabolic process | GO:0006950 response to stress |	GO:0004555 alpha,alpha-trehalase activity |	GO:0009277 fungal-type cell wall | GO:0000324 fungal-type vacuole | GO:0030287 cell wall-bounded periplasmic space |
orf19.5691	0.815438	0.647202	1.48753	0.485546	CDC11	1.8242	Septin; required for wild-type cell and hyphal morphology, agar-invasive growth, full virulence and kidney tissue invasion in mouse, but not for kidney colonization, immunogenicity; phosphorylation is hyphal- and cell-cycle-regulated	GO:0000921 septin ring assembly | GO:0030448 hyphal growth | GO:0030447 filamentous growth | GO:0006033 chitin localization | GO:0009405 pathogenesis | GO:0000747 conjugation with cellular fusion | GO:0007047 cell wall organization | GO:0007120 axial cellular bud site selection | GO:0040023 establishment of nucleus localization | GO:0001410 chlamydospore formation | GO:0008105 asymmetric protein …	GO:0005200 structural constituent of cytoskeleton | GO:0005545 phosphatidylinositol binding |	GO:0005940 septin ring | GO:0005619 ascospore wall | GO:0000144 cellular bud neck septin ring | GO:0005628 prospore membrane | GO:0005935 cellular bud neck | GO:0001411 hyphal tip | GO:0032168 hyphal septin ring | GO:0000399 cellular bud neck septin structure | GO:0043332 mating projection tip | GO:0001400 mating projection base | GO:0031105 septin complex |
orf19.2270	0.944258	0.94969	1.72181	0.263235	SMF12	1.82345	Protein not essential for viability; similar to S. cerevisiae Smf1p, which is a manganese transporter; Gcn4p-regulated; alkaline upregulated; caspofungin repressed	GO:0006828 manganese ion transport |	GO:0005384 manganese ion transmembrane transporter activity |	GO:0000324 fungal-type vacuole | GO:0005886 plasma membrane |
orf19.6705	1.04134	0.781578	1.89566	0.362473		1.8204	Putative guanyl nucleotide exchange factor with Sec7 domain; transcriptionally regulated upon yeast-hyphal switch; filament induced; regulated by Nrg1p, Tup1p; shows Mob2p-dependent hyphal regulation	GO:0051666 actin cortical patch localization | GO:0008104 protein localization | GO:0030447 filamentous growth |	GO:0005085 guanyl-nucleotide exchange factor activity | GO:0005086 ARF guanyl-nucleotide exchange factor activity |	GO:0005934 cellular bud tip | GO:0005737 cytoplasm | GO:0005935 cellular bud neck |
orf19.3900	0.805606	0.083445	1.46474	0.0565389		1.81818	Predicted ORF in Assemblies 19, 20 and 21	GO:0006810 transport | GO:0008053 mitochondrial fusion | GO:0030447 filamentous growth | GO:0000002 mitochondrial genome maintenance |	GO:0005215 transporter activity |	GO:0005741 mitochondrial outer membrane |
orf19.424	0.781146	0.467984	1.41983	0.456	TRP99	1.81762	Protein described as thioredoxin peroxidase/alkyl hydroperoxide reductase; transcriptionally regulated by iron; expression greater in low iron; regulated by Gcn4p; induced in response to amino acid starvation (3-aminotriazole treatment)	GO:0006979 response to oxidative stress |	GO:0008379 thioredoxin peroxidase activity | GO:0008785 alkyl hydroperoxide reductase activity |	GO:0005737 cytoplasm |
orf19.3041	0.844278	0.623967	1.53341	0.0951859		1.81624	Predicted ORF in Assemblies 19, 20 and 21
orf19.944	0.513476	0.400314	0.932549	0.945064	IFG3	1.81615	Putative D-amino acid oxidase
orf19.3100	0.932043	0.398769	1.69109	0.0800227		1.81439	Predicted ORF in Assemblies 19, 20 and 21; transcription is repressed in response to alpha pheromone in SpiderM medium	GO:0006461 protein complex assembly | GO:0006888 ER to Golgi vesicle-mediated transport |		GO:0005625 soluble fraction |
orf19.3434	1.01971	0.842725	1.84911	0.557084		1.81337	Predicted ORF in Assemblies 19, 20 and 21
orf19.6287	0.580786	0.123457	1.05313	0.872315	AAT21	1.81328	Predicted ORF in Assemblies 19, 20 and 21; Gcn4p-regulated; protein detected by mass spec in exponential and stationary phase cultures	GO:0006536 glutamate metabolic process | GO:0006533 aspartate catabolic process | GO:0006532 aspartate biosynthetic process |	GO:0004069 L-aspartate |	GO:0005829 cytosol | GO:0005777 peroxisome |
orf19.3549	0.987938	0.881345	1.79078	0.0951288	CDC21	1.81265	Predicted ORF in Assemblies 19, 20 and 21; flucytosine induced; transcription is downregulated in both intermediate and mature biofilms	GO:0006231 dTMP biosynthetic process | GO:0006261 DNA-dependent DNA replication |	GO:0004799 thymidylate synthase activity |	GO:0005634 nucleus |
orf19.7111.1	0.866855	0.79095	1.57067	0.787091	SOD3	1.81192	Cytosolic manganese-containing superoxide dismutase, involved in protection against oxidative stress; transcription downregulated by treatment with ciclopirox olamine, induced during stationary phase when SOD1 expression is repressed	GO:0006979 response to oxidative stress | GO:0006800 oxygen and reactive oxygen species metabolic process |	GO:0004784 superoxide dismutase activity |	GO:0005829 cytosol | GO:0005759 mitochondrial matrix |
orf19.6977	0.631849	0.632524	1.14427	0.118455	GPI1	1.81098	Putative protein of GPI synthesis; expression is reduced in a fluconazole-resistant isolate	GO:0006506 GPI anchor biosynthetic process |		GO:0016020 membrane |
orf19.3263	0.617066	0.479634	1.11743	0.919138		1.81087	Predicted ORF in Assemblies 19, 20 and 21	GO:0007126 meiosis | GO:0006259 DNA metabolic process |
orf19.6066	0.598504	0.151378	1.08113	0.840624		1.80638	Predicted ORF in Assemblies 19, 20 and 21			GO:0005811 lipid particle | GO:0005768 endosome | GO:0031307 integral to mitochondrial outer membrane |
orf19.3775	0.952372	0.935263	1.71941	0.600784	SSK2	1.8054	Protein described as similar to MAP kinase kinase kinases; transcription is downregulated in response to treatment with ciclopirox olamine	GO:0000168 activation of MAPKK activity involved in osmosensory signaling pathway | GO:0046686 response to cadmium ion | GO:0006970 response to osmotic stress | GO:0006979 response to oxidative stress | GO:0031098 stress-activated protein kinase signaling pathway | GO:0010526 negative regulation of transposition, RNA-mediated | GO:0030036 actin cytoskeleton organization |	GO:0004709 MAP kinase kinase kinase activity |	GO:0005934 cellular bud tip | GO:0005829 cytosol | GO:0005935 cellular bud neck |
orf19.7242	0.731112	0.637148	1.31885	0.297797	NCR1	1.8039	Transcription is regulated by Nrg1p and Mig1p; increased expression in response to prostaglandins	GO:0006665 sphingolipid metabolic process |	GO:0046624 sphingolipid transporter activity |	GO:0000329 fungal-type vacuole membrane |
orf19.317	0.699047	0.382542	1.2607	0.360617		1.80346	Predicted ORF in Assemblies 19, 20 and 21	GO:0034356 NAD biosynthesis via nicotinamide riboside salvage pathway | GO:0046115 guanosine catabolic process | GO:0019358 nicotinate nucleotide salvage | GO:0006148 inosine catabolic process |	GO:0070635 nicotinamide riboside hydrolase activity | GO:0047724 inosine nucleosidase activity | GO:0004731 purine-nucleoside phosphorylase activity |
orf19.2524	0.82875	0.0505941	1.49206	0.0158421	MGE1	1.80038	Predicted ORF in Assemblies 19, 20 and 21; macrophage/pseudohyphal-repressed	GO:0006461 protein complex assembly | GO:0042026 protein refolding | GO:0030150 protein import into mitochondrial matrix |	GO:0051082 unfolded protein binding | GO:0001671 ATPase activator activity |	GO:0001405 presequence translocase-associated import motor | GO:0005759 mitochondrial matrix |
orf19.2762	1.0039	0.995691	1.80376	0.153228	AHP1	1.79675	Putative alkyl hydroperoxide reductase; immunogenic in mouse; biofilm-induced; fluconazole-induced; amphotericin B, caspofungin, alkaline downregulated; induced in core stress response; regulated by Ssk1p, Nrg1p, Tup1p, Ssn6p, Hog1p	GO:0010038 response to metal ion | GO:0045454 cell redox homeostasis | GO:0006979 response to oxidative stress |	GO:0008785 alkyl hydroperoxide reductase activity | GO:0008379 thioredoxin peroxidase activity |	GO:0030446 hyphal cell wall | GO:0005625 soluble fraction | GO:0001950 plasma membrane enriched fraction | GO:0005737 cytoplasm |
orf19.6460	0.636622	0.591115	1.14308	0.490262		1.79555	Predicted ORF in Assemblies 19, 20 and 21	GO:0016562 protein import into peroxisome matrix, receptor recycling |	GO:0046982 protein heterodimerization activity | GO:0016887 ATPase activity |	GO:0005625 soluble fraction | GO:0005777 peroxisome | GO:0005624 membrane fraction |
orf19.4121	0.926285	0.144621	1.66255	0.0587192		1.79486	Predicted ORF in Assemblies 19, 20 and 21	GO:0006631 fatty acid metabolic process |
orf19.2005	0.54862	0.440898	0.983627	0.984785	REG1	1.79291	Predicted ORF in Assemblies 19, 20 and 21; macrophage/pseudohyphal-induced; possibly transcriptionally regulated upon hyphal formation	GO:0000122 negative regulation of transcription from RNA polymerase II promoter | GO:0005977 glycogen metabolic process | GO:0006109 regulation of carbohydrate metabolic process | GO:0007039 vacuolar protein catabolic process |		GO:0000164 protein phosphatase type 1 complex | GO:0005737 cytoplasm |
orf19.6112	0.804908	0.572033	1.44013	0.345128	CTA2	1.78918	Putative transcriptional activator, activates transcription in 1-hybrid assay in S. cerevisiae; downregulated by Efg1p; member of a family of telomere-proximal genes; transcription is positively regulated by Tbf1p	GO:0045893 positive regulation of transcription, DNA-dependent |	GO:0016563 transcription activator activity |
orf19.3442	1.34345	0.403937	2.40313	0.467304		1.78877	Predicted ORF in Assemblies 19, 20 and 21		GO:0003959 NADPH dehydrogenase activity |
orf19.6127	0.634413	0.258923	1.13404	0.116791	LPD1	1.78753	Putative dihydrolipoamide dehydrogenase; soluble protein in hyphae; antigenic during human oral infection and murine systemic infection; macrophage-induced protein	GO:0006520 cellular amino acid metabolic process | GO:0009405 pathogenesis | GO:0006086 acetyl-CoA biosynthetic process from pyruvate | GO:0006552 leucine catabolic process | GO:0006090 pyruvate metabolic process | GO:0006574 valine catabolic process | GO:0006550 isoleucine catabolic process | GO:0006564 L-serine biosynthetic process | GO:0006103 2-oxoglutarate metabolic process | GO:0006546 glyc…	GO:0004148 dihydrolipoyl dehydrogenase activity | GO:0004375 glycine dehydrogenase (decarboxylating) activity | GO:0004738 pyruvate dehydrogenase activity | GO:0004591 oxoglutarate dehydrogenase (succinyl-transferring) activity |	GO:0005625 soluble fraction | GO:0005967 mitochondrial pyruvate dehydrogenase complex | GO:0042645 mitochondrial nucleoid | GO:0005960 glycine cleavage complex | GO:0009353 mitochondrial oxoglutarate dehydrogenase complex |
orf19.51	0.854475	0.115268	1.52625	0.218022		1.78619	Predicted ORF in Assemblies 19, 20 and 21	GO:0007005 mitochondrion organization | GO:0006413 translational initiation |	GO:0003743 translation initiation factor activity |	GO:0005840 ribosome | GO:0005852 eukaryotic translation initiation factor 3 complex |
orf19.5747	0.918266	0.745816	1.63848	0.260375		1.78432	Predicted ORF in Assemblies 19, 20 and 21		GO:0000049 tRNA binding | GO:0003735 structural constituent of ribosome |	GO:0005763 mitochondrial small ribosomal subunit |
orf19.1936	0.809927	0.818805	1.44247	0.704327	SNF1	1.78099	Essential protein; functional homolog of S. cerevisiae Snf1p regulator of sugar metabolism; constitutively expressed; Thr208 phosphorylation may have regulatory role; up-regulation associated with azole resistance; has polyhistidine tract	GO:0006109 regulation of carbohydrate metabolic process | GO:0007165 signal transduction | GO:0006006 glucose metabolic process | GO:0001302 replicative cell aging | GO:0007155 cell adhesion | GO:0006995 cellular response to nitrogen starvation | GO:0006468 protein amino acid phosphorylation | GO:0007124 pseudohyphal growth | GO:0017148 negative regulation of translation | GO:0045722 positive reg…	GO:0004674 protein serine/threonine kinase activity | GO:0004679 AMP-activated protein kinase activity |	GO:0000324 fungal-type vacuole | GO:0005739 mitochondrion | GO:0005641 nuclear envelope lumen | GO:0031588 AMP-activated protein kinase complex |
orf19.223	0.806456	0.712993	1.43389	0.609394		1.77801	Predicted ORF in Assemblies 19, 20 and 21; increased expression in response to prostaglandins	GO:0045332 phospholipid translocation | GO:0019236 response to pheromone |	GO:0004672 protein kinase activity |	GO:0005737 cytoplasm |
orf19.4171	1.22366	0.0981197	2.17498	0.194244		1.77744	Predicted ORF in Assemblies 19, 20 and 21
orf19.1860	1.06727	0.988823	1.89434	0.891876	LSC2	1.77494	Protein described as beta subunit of succinate-CoA ligase; transcription regulated by Mig1p and Tup1p; transcriptionally regulated by iron; expression greater in high iron; filament induced	GO:0006099 tricarboxylic acid cycle | GO:0006104 succinyl-CoA metabolic process |	GO:0004774 succinate-CoA ligase activity | GO:0004775 succinate-CoA ligase (ADP-forming) activity |	GO:0005759 mitochondrial matrix | GO:0005739 mitochondrion |
orf19.2532	0.871465	0.231097	1.54662	0.00591391	PRS	1.77473	Putative prolyl-tRNA synthetase; monofunctional Class II synthetase; gene is constitutively expressed		GO:0004827 proline-tRNA ligase activity |	GO:0005739 mitochondrion |
orf19.6639	0.78904	0.690723	1.39975	0.673161		1.77399	Predicted ORF in Assemblies 19, 20 and 21
orf19.4225.1	0.67454	0.349356	1.19581	0.390473		1.77277	ORF added to Assembly 21 based on comparative genome analysis
orf19.3355	0.67865	0.270987	1.20119	0.359443	ISN1	1.76998	Putative inosine 5'-monophosphate 5'-nucleotidase; fungal-specific (no human or murine homolog)	GO:0006190 inosine salvage |	GO:0050483 IMP 5'-nucleotidase activity |
orf19.5779	0.985503	0.885378	1.74417	0.37043	RNR1	1.76982	Protein similar S. cerevisiae Rnr1p, large subunit of ribonucleotide reductase; expression greater in low iron; transposon mutation affects filamentous growth; farnesol upregulated in biofilm; regulated by cell cycle, tyrosol, cell density	GO:0030447 filamentous growth | GO:0006260 DNA replication | GO:0009263 deoxyribonucleotide biosynthetic process |	GO:0004748 ribonucleoside-diphosphate reductase activity | GO:0000166 nucleotide binding |	GO:0005829 cytosol | GO:0005971 ribonucleoside-diphosphate reductase complex |
orf19.5618	0.839473	0.806296	1.48534	0.476316		1.76937	Predicted ORF in Assemblies 19, 20 and 21	GO:0006461 protein complex assembly | GO:0006896 Golgi to vacuole transport | GO:0007033 vacuole organization |	GO:0051082 unfolded protein binding |	GO:0005829 cytosol | GO:0019898 extrinsic to membrane | GO:0000139 Golgi membrane |
orf19.2278	0.866152	0.31244	1.53183	0.525981		1.76855	Predicted ORF in Assemblies 19, 20 and 21; filament induced; transcription is induced in response to alpha pheromone in SpiderM medium	GO:0043248 proteasome assembly | GO:0030433 ER-associated protein catabolic process |		GO:0005829 cytosol |
orf19.4991	1.26742	0.581416	2.24096	0.547338	MPT5	1.76813	Protein induced during the mating process	GO:0006605 protein targeting | GO:0008104 protein localization | GO:0000321 re-entry into mitotic cell cycle after pheromone arrest | GO:0000288 nuclear-transcribed mRNA catabolic process, deadenylation-dependent decay | GO:0001308 loss of chromatin silencing during replicative cell aging | GO:0007047 cell wall organization |	GO:0003729 mRNA binding |	GO:0005737 cytoplasm |
orf19.1701	0.767641	0.333362	1.35583	0.0124288	RKI1	1.76624	Predicted ORF in Assemblies 19, 20 and 21	GO:0008615 pyridoxine biosynthetic process | GO:0006098 pentose-phosphate shunt |	GO:0004751 ribose-5-phosphate isomerase activity |	GO:0005634 nucleus | GO:0005737 cytoplasm |
orf19.4633	0.635496	0.332069	1.12125	0.725414		1.76437	Predicted ORF in Assemblies 19, 20 and 21		GO:0016620 oxidoreductase activity, acting on the aldehyde or oxo group of donors, NAD or NADP as acceptor | GO:0004090 carbonyl reductase (NADPH) activity |	GO:0005634 nucleus | GO:0005737 cytoplasm | GO:0005840 ribosome |
orf19.212	0.925408	0.825997	1.63259	0.279523	VPS28	1.76418	Protein involved in proteolytic activation of Rim101p, which regulates pH response; role in echinocandin, azole sensitivity; similar to S. cerevisiae Vps28p, which is a subunit of the ESCRT I protein sorting complex	GO:0006623 protein targeting to vacuole | GO:0016485 protein processing | GO:0009268 response to pH | GO:0030448 hyphal growth | GO:0009405 pathogenesis | GO:0031505 fungal-type cell wall organization | GO:0042493 response to drug | GO:0006612 protein targeting to membrane |	GO:0005515 protein binding |	GO:0000813 ESCRT I complex |
orf19.2871	1.0084	0.898012	1.77596	0.0996129	SDH12	1.76117	Protein with similarity to S. cerevisiae SDH1, which is a flavoprotein subunit of succinate dehydrogenase; soluble protein in hyphae; macrophage-downregulated protein level; downregulated by Efg1p; repressed by nitric oxide	GO:0006105 succinate metabolic process | GO:0006121 mitochondrial electron transport, succinate to ubiquinone |	GO:0000104 succinate dehydrogenase activity |	GO:0005625 soluble fraction | GO:0005749 mitochondrial respiratory chain complex II | GO:0005759 mitochondrial matrix |
orf19.7544	0.728321	0.500621	1.28235	0.545443	TLO1	1.7607	Member of a family of telomere-proximal genes of unknown function; hyphal-induced expression
orf19.5342.2	0.790829	0.19894	1.39235	0.101766		1.76062	ORF added to Assembly 21 based on comparative genome analysis
orf19.2844	0.903526	0.117661	1.59055	0.147792		1.76038	Predicted ORF in Assemblies 19, 20 and 21; induced in core caspofungin response	GO:0006896 Golgi to vacuole transport |	GO:0030276 clathrin binding |	GO:0030121 AP-1 adaptor complex |
orf19.5449	0.556508	0.542503	0.978327	0.940367		1.75797	Predicted ORF in Assemblies 19, 20 and 21
orf19.6129	0.860414	0.55295	1.51214	0.159447	MRPL8	1.75746	Predicted ribosomal protein of the mitochondrial 60S subunit	GO:0006412 translation | GO:0000002 mitochondrial genome maintenance |	GO:0003735 structural constituent of ribosome |	GO:0005762 mitochondrial large ribosomal subunit |
orf19.5450	0.618073	0.306058	1.08571	0.77273		1.7566	Predicted ORF in Assemblies 19, 20 and 21; protein detected by mass spec in exponential and stationary phase cultures	GO:0007585 respiratory gaseous exchange | GO:0009060 aerobic respiration | GO:0006633 fatty acid biosynthetic process |	GO:0016631 enoyl-[acyl-carrier-protein] reductase activity |	GO:0005739 mitochondrion |
orf19.1957	0.877548	0.775171	1.54136	0.524246	CYC3	1.75644	Cytochrome c heme lyase, mitochondrial; gene also encodes antigenic cell-wall protein; mRNA more abundant in filaments than yeast-form; induced on polystyrene adherence, interaction with macrophage; N-glycosylation, 2 heme-binding motifs	GO:0018063 cytochrome c-heme linkage | GO:0030448 hyphal growth | GO:0009060 aerobic respiration |	GO:0004408 holocytochrome-c synthase activity |	GO:0005739 mitochondrion | GO:0009277 fungal-type cell wall | GO:0005758 mitochondrial intermembrane space |
orf19.6944	0.698645	0.623289	1.22374	0.790717	PHB1	1.7516	Protein described as prohibitin; identified in detergent-resistant membrane fraction (possible lipid raft component); predicted N-terminal acetylation	GO:0006508 proteolysis | GO:0007569 cell aging |		GO:0005739 mitochondrion | GO:0005624 membrane fraction | GO:0005886 plasma membrane |
orf19.5445	0.746403	0.0380199	1.30254	0.0727117	GLO3	1.74509	Protein not essential for viability; similar to S. cerevisiae Glo3p, which is a GTPase-activating protein for ADP-ribosylation factors	GO:0006888 ER to Golgi vesicle-mediated transport | GO:0048205 COPI coating of Golgi vesicle | GO:0006890 retrograde vesicle-mediated transport, Golgi to ER |	GO:0008060 ARF GTPase activator activity |	GO:0005793 ER-Golgi intermediate compartment | GO:0030126 COPI vesicle coat |
orf19.3752	0.74861	0.0178513	1.30632	0.447828	RAD51	1.74499	Predicted ORF in Assemblies 19, 20 and 21; flucytosine induced; slow growth and increased white-to-opaque switching frequency in null mutant	GO:0045002 double-strand break repair via single-strand annealing | GO:0000727 double-strand break repair via break-induced replication | GO:0042148 strand invasion | GO:0030491 heteroduplex formation | GO:0000709 meiotic joint molecule formation | GO:0000722 telomere maintenance via recombination |	GO:0008094 DNA-dependent ATPase activity | GO:0000150 recombinase activity |	GO:0000794 condensed nuclear chromosome |
orf19.6928	0.663311	0.608289	1.15337	0.698965	SAP9	1.73881	Secreted aspartyl proteinase; roles in adhesion, cell surface integrity; induced by antifungal drugs, stationary phase, or in white-phase cells; farnesol-downregulated in biofilm; autocatalytic processing; GPI-anchor; N-glycosylated	GO:0031505 fungal-type cell wall organization | GO:0044406 adhesion to host | GO:0016485 protein processing | GO:0052155 modulation by symbiont of host cell-mediated immune response |	GO:0004190 aspartic-type endopeptidase activity | GO:0005199 structural constituent of cell wall |	GO:0009986 cell surface | GO:0046658 anchored to plasma membrane | GO:0031225 anchored to membrane | GO:0009277 fungal-type cell wall |
orf19.2396	1.25634	0.752857	2.18036	0.684202	IFR2	1.73549	Increased transcription is observed upon benomyl treatment; transcription is upregulated in response to treatment with ciclopirox olamine, alpha pheromone; regulated by oxidative stress (via Cap1p) and osmotic stress (via Hog1p)
orf19.637	1.05146	0.915201	1.82269	0.213594	SDH2	1.73348	Succinate dehydrogenase, Fe-S subunit; localizes to surface of yeast-form cells, but not hyphae; transcriptionally regulated by iron; expression greater in high iron; repressed by nitric oxide; induced during log phase (aerobic growth)	GO:0006099 tricarboxylic acid cycle | GO:0006105 succinate metabolic process | GO:0006121 mitochondrial electron transport, succinate to ubiquinone |	GO:0000104 succinate dehydrogenase activity | GO:0008177 succinate dehydrogenase (ubiquinone) activity |	GO:0030445 yeast-form cell wall | GO:0009986 cell surface | GO:0005759 mitochondrial matrix | GO:0005749 mitochondrial respiratory chain complex II |
orf19.1546	1.06794	0.806295	1.84917	0.0214621		1.73153	Predicted ORF in Assemblies 19, 20 and 21			GO:0005886 plasma membrane |
orf19.577	0.625152	0.597016	1.08222	0.836191		1.73113	Predicted ORF in Assemblies 19, 20 and 21
orf19.3932.1	0.925879	0.775067	1.6015	0.530251		1.7297	ORF added to Assembly 21 based on comparative genome analysis
orf19.2290	0.957398	0.802625	1.6546	0.577178	TOR1	1.72823	Protein similar to TOR family phosphatidylinositol kinases; mutation confers resistance to rapamycin; involved in regulation of ribosome biogenesis, starvation response, and adhesion	GO:0042493 response to drug | GO:0030037 actin filament reorganization during cell cycle | GO:0000080 G1 phase of mitotic cell cycle | GO:0006897 endocytosis | GO:0030950 establishment or maintenance of actin cytoskeleton polarity | GO:0007266 Rho protein signal transduction | GO:0031929 TOR signaling pathway | GO:0007162 negative regulation of cell adhesion | GO:0006995 cellular response to nitr…	GO:0016303 1-phosphatidylinositol-3-kinase activity | GO:0004674 protein serine/threonine kinase activity | GO:0005515 protein binding |	GO:0005739 mitochondrion | GO:0031932 TORC2 complex | GO:0005624 membrane fraction | GO:0031931 TORC1 complex | GO:0031234 extrinsic to internal side of plasma membrane | GO:0005774 vacuolar membrane |
orf19.3219	1.91455	0.156254	3.30847	0.0112223		1.72806	Predicted ORF in Assemblies 19, 20 and 21	GO:0015992 proton transport |
orf19.992	0.780422	0.155588	1.34757	0.437676	LKH1	1.72672	Protein repressed during the mating process; Hog1p-induced	GO:0030163 protein catabolic process | GO:0006629 lipid metabolic process |	GO:0004463 leukotriene-A4 hydrolase activity | GO:0004177 aminopeptidase activity | GO:0004301 epoxide hydrolase activity |	GO:0005634 nucleus | GO:0005737 cytoplasm |
orf19.7545	0.560437	0.459074	0.967371	0.540556		1.7261	Predicted ORF in Assemblies 19, 20 and 21; similarity to mutator-like element (MULE) transposase; possibly spurious ORF (Annotation Working Group prediction)
orf19.2091	1.1192	0.572074	1.93107	0.395344		1.7254	Predicted ORF in Assemblies 19, 20 and 21; repressed by nitric oxide			GO:0005886 plasma membrane |
orf19.6113	0.91052	0.680217	1.57058	0.763833		1.72493	Predicted ORF in Assemblies 19, 20 and 21
orf19.3166	0.704715	0.147442	1.21513	0.443116		1.72429	Predicted ORF in Assemblies 19, 20 and 21	GO:0007029 endoplasmic reticulum organization | GO:0006895 Golgi to endosome transport | GO:0000902 cell morphogenesis |		GO:0005739 mitochondrion |
orf19.1618	1.03964	0.816407	1.79208	0.481919	GFA1	1.72376	Glucosamine-6-phosphate synthase; enzyme of chitin/hexosamine biosynthesis; homotetrameric; inhibited by UDP-GlcNAc, FMDP, N-acyl peptide, kanosamine-6-P; functional homolog of S. cerevisiae Gfa1p; growth-phase regulated; catalytic Cys	GO:0042493 response to drug | GO:0006487 protein amino acid N-linked glycosylation | GO:0006042 glucosamine biosynthetic process | GO:0006031 chitin biosynthetic process | GO:0006038 cell wall chitin biosynthetic process | GO:0030448 hyphal growth |	GO:0004360 glutamine-fructose-6-phosphate transaminase (isomerizing) activity |
orf19.2599	0.986213	0.739829	1.69894	0.160178		1.7227	Predicted ORF in Assemblies 19, 20 and 21	GO:0006631 fatty acid metabolic process |	GO:0005476 carnitine |	GO:0005743 mitochondrial inner membrane | GO:0005886 plasma membrane |
orf19.673	0.430557	0.494982	0.741647	0.42602		1.72253	Predicted ORF in Assemblies 19, 20 and 21		GO:0003959 NADPH dehydrogenase activity |
orf19.6853	0.941764	0.883166	1.62118	0.258881		1.72143	Predicted ORF in Assemblies 19, 20 and 21
orf19.7605	0.599152	0.334381	1.03049	0.775363	PUP1	1.71992	Predicted ORF in Assemblies 19, 20 and 21; macrophage/pseudohyphal-repressed	GO:0006511 ubiquitin-dependent protein catabolic process |	GO:0004175 endopeptidase activity |	GO:0019774 proteasome core complex, beta-subunit complex | GO:0034515 proteasome storage granule |
orf19.6070	0.388339	0.601118	0.667017	0.450052	ENA2	1.71762	Protein described as sodium transporter; transcription is upregulated in response to ciclopirox olamine; alkaline upregulated by Rim101p; repressed upon high-level peroxide stress; upregulated in oral candidiasis clinical isolates	GO:0006814 sodium ion transport | GO:0006813 potassium ion transport | GO:0055085 transmembrane transport |	GO:0008556 potassium-transporting ATPase activity | GO:0008554 sodium-exporting ATPase activity, phosphorylative mechanism |	GO:0005739 mitochondrion | GO:0005624 membrane fraction | GO:0005886 plasma membrane |
orf19.5205	0.971137	0.887218	1.66768	0.00299228		1.71724	Predicted ORF in Assemblies 19, 20 and 21
orf19.717	0.838329	0.831535	1.43958	0.759283	HSP60	1.71721	Protein described as mitochondrial heat shock protein; soluble protein in hyphae; transcription is regulated by Nrg1p; transcriptionally regulated by iron; expression greater in high iron; heavy metal (cadmium) stress-induced	GO:0045041 protein import into mitochondrial intermembrane space | GO:0051131 chaperone-mediated protein complex assembly | GO:0050821 protein stabilization | GO:0042026 protein refolding | GO:0006458 'de novo' protein folding | GO:0051604 protein maturation |	GO:0042623 ATPase activity, coupled | GO:0051082 unfolded protein binding | GO:0003697 single-stranded DNA binding | GO:0003688 DNA replication origin binding | GO:0051087 chaperone binding | GO:0016887 ATPase activity |	GO:0005625 soluble fraction | GO:0042645 mitochondrial nucleoid |
orf19.3669	0.872752	0.890176	1.49808	0.523889	SHA3	1.71651	Protein similar to S. cerevisiae Sha3p, which is a serine/threonine kinase involved in glucose transport; transposon mutation affects filamentous growth; fluconazole-induced; ketoconazole-repressed; induced in response to alpha pheromone	GO:0030447 filamentous growth | GO:0006468 protein amino acid phosphorylation | GO:0015758 glucose transport | GO:0045944 positive regulation of transcription from RNA polymerase II promoter | GO:0009749 response to glucose stimulus |	GO:0004674 protein serine/threonine kinase activity |	GO:0005634 nucleus | GO:0005737 cytoplasm |
orf19.2463	0.862454	0.667191	1.47905	0.467441	PRN2	1.71493	Predicted ORF in Assemblies 19, 20 and 21; similar to pirin
orf19.7264	0.67422	0.310721	1.15517	0.140466		1.71334	Predicted ORF in Assemblies 19, 20 and 21	GO:0006511 ubiquitin-dependent protein catabolic process |	GO:0004175 endopeptidase activity |	GO:0008541 proteasome regulatory particle, lid subcomplex | GO:0005634 nucleus | GO:0034515 proteasome storage granule |
orf19.5848	0.959362	0.945591	1.64128	0.361952		1.7108	Predicted ORF in Assemblies 19, 20 and 21; possibly spurious ORF (Annotation Working Group prediction)
orf19.69	0.5221	0.45525	0.892394	0.875077		1.70924	Predicted ORF in Assemblies 19, 20 and 21; possibly spurious ORF (Annotation Working Group prediction); transcriptionally activated by Mnl1p under weak acid stress
orf19.3352	0.863903	0.63163	1.47618	0.165204		1.70874	Predicted ORF in Assemblies 19, 20 and 21
orf19.3190	1.11359	0.655214	1.90255	0.559342	HAL9	1.70848	Protein with Zn(2)-Cys(6) binuclear cluster; gene in zinc cluster region of Chr. 5; transcriptionally activated by Mnl1p in weak acid; similar to S. cerevisiae Hal9p, which is a putative transcription factor involved in salt tolerance	GO:0009651 response to salt stress | GO:0006367 transcription initiation from RNA polymerase II promoter |	GO:0043565 sequence-specific DNA binding | GO:0003704 specific RNA polymerase II transcription factor activity |	GO:0005634 nucleus | GO:0005739 mitochondrion |
orf19.812	0.450815	0.485698	0.769806	0.401281		1.70759	Predicted ORF in Assemblies 19, 20 and 21; possibly spurious ORF (Annotation Working Group prediction)
orf19.2809	0.898875	0.46634	1.53475	0.0508338	CTN3	1.70741	Predicted peroxisomal carnitine acetyl transferase; Ura+ deletion strain has no obvious metabolic, hyphal, or virulence defects; transcription induced by macrophage engulfment, hyphal growth, starvation, or nonfermentable carbon sources	GO:0006084 acetyl-CoA metabolic process | GO:0009437 carnitine metabolic process | GO:0006066 alcohol metabolic process |	GO:0004092 carnitine O-acetyltransferase activity |	GO:0005777 peroxisome | GO:0005829 cytosol |
orf19.4488	0.863105	0.255852	1.47273	0.157746		1.70631	Predicted ORF in Assemblies 19, 20 and 21	GO:0045893 positive regulation of transcription, DNA-dependent | GO:0043044 ATP-dependent chromatin remodeling |	GO:0016251 general RNA polymerase II transcription factor activity |	GO:0016514 SWI/SNF complex |
orf19.2772	0.933342	0.63116	1.59189	0.00308542	HOS3	1.70558	Histone deacetylase; similar to S. cerevisiae Hos3p; greater expression and longer mRNA in white cells, compared to opaque cells; has conserved deacetylation motif	GO:0010552 positive regulation of gene-specific transcription from RNA polymerase II promoter | GO:0016575 histone deacetylation |	GO:0004407 histone deacetylase activity |	GO:0005634 nucleus | GO:0005737 cytoplasm | GO:0005935 cellular bud neck |
orf19.7405	0.937926	0.310233	1.59899	0.678706		1.70482	Predicted ORF in Assemblies 19, 20 and 21; transcriptionally activated by Mnl1p under weak acid stress
orf19.5622	0.851891	0.368551	1.45226	0.190912	GLC3	1.70474	Protein described as similar to 1,4-glucan branching enzyme; fluconazole-induced; shows colony morphology-related gene regulation by Ssn6p; protein detected by mass spec in stationary phase cultures	GO:0005978 glycogen biosynthetic process |	GO:0003844 1,4-alpha-glucan branching enzyme activity |	GO:0005737 cytoplasm |
orf19.6193	1.5028	0.57248	2.5605	0.420119	TAF145	1.70382	Protein likely to be essential for growth, based on an insertional mutagenesis strategy; similar to S. cerevisiae Taf145p, which is a component of RNA polymerase II transcription factor TFIID; flucytosine repressed	GO:0006367 transcription initiation from RNA polymerase II promoter | GO:0006468 protein amino acid phosphorylation | GO:0006355 regulation of transcription, DNA-dependent |	GO:0004674 protein serine/threonine kinase activity | GO:0016251 general RNA polymerase II transcription factor activity | GO:0003700 transcription factor activity |
orf19.1198	0.779145	0.460981	1.32743	0.68835		1.7037	Predicted ORF in Assemblies 19, 20 and 21			GO:0005737 cytoplasm |
orf19.4932	1.20924	0.694714	2.05857	0.113857		1.70236	Predicted ORF in Assemblies 19, 20 and 21	GO:0032543 mitochondrial translation |		GO:0005739 mitochondrion |
orf19.5255	0.835177	0.4575	1.42072	0.18843	PXA2	1.7011	Putative peroxisomal, half-size adrenoleukodystrophy protein (ALD or ALDp) subfamily ABC transporter; Gcn4p-regulated	GO:0006810 transport | GO:0015908 fatty acid transport |	GO:0042626 ATPase activity, coupled to transmembrane movement of substances | GO:0005524 ATP binding |	GO:0016021 integral to membrane | GO:0005779 integral to peroxisomal membrane |
orf19.1201	1.05477	0.671517	1.79421	0.287815		1.70103	Predicted ORF in Assemblies 19, 20 and 21	GO:0070158 mitochondrial seryl-tRNA aminoacylation | GO:0009060 aerobic respiration | GO:0007124 pseudohyphal growth | GO:0001403 invasive growth in response to glucose limitation |	GO:0004828 serine-tRNA ligase activity |	GO:0005739 mitochondrion |
orf19.191	0.80291	0.457646	1.36548	0.260785	KIC1	1.70066	Member of the GCK-III subfamily of eukaryotic Ste20p kinases; in RAM cell wall integrity signaling network; role in cell separation, azole sensitivity; required for hyphal growth; constitutive expression is MTL, white-opaque independent	GO:0007047 cell wall organization | GO:0042493 response to drug | GO:0007163 establishment or maintenance of cell polarity | GO:0030447 filamentous growth | GO:0000920 cell separation during cytokinesis | GO:0000903 cell morphogenesis during vegetative growth |	GO:0016301 kinase activity |	GO:0043332 mating projection tip | GO:0005933 cellular bud | GO:0005737 cytoplasm | GO:0000131 incipient cellular bud site |
orf19.4508	0.649749	0.484218	1.10487	0.87099		1.70046	Predicted ORF in Assemblies 19, 20 and 21
orf19.7362	1.30093	0.250141	2.21158	0.106017	SKN1	1.69999	Protein with predicted role in beta-1,6-glucan synthesis; probable N-glycosylated type II membrane protein; transcription and change in mRNA length induced by yeast-hyphal transition; transcription induced by Rim101p or caspofungin	GO:0006078 1,6-beta-glucan biosynthetic process |		GO:0016021 integral to membrane |
orf19.316	0.780642	0.236362	1.32643	0.400039	SEC13	1.69915	Protein described as protein transport factor; antigenic during murine systemic infection; macrophage-downregulated protein abundance; protein level decreased in stationary phase cultures	GO:0006888 ER to Golgi vesicle-mediated transport | GO:0030433 ER-associated protein catabolic process | GO:0006900 membrane budding |	GO:0005198 structural molecule activity |	GO:0019897 extrinsic to plasma membrane | GO:0005643 nuclear pore | GO:0030127 COPII vesicle coat | GO:0019898 extrinsic to membrane |
orf19.2289	0.724698	0.183713	1.23134	0.0207915	ARP3	1.69911	Predicted ORF in Assemblies 19, 20 and 21; shows Myo5p-dependent localization to cortical actin patches at hyphal tip; mutation confers hypersensitivity to cytochalasin D	GO:0042493 response to drug | GO:0034314 Arp2/3 complex-mediated actin nucleation |	GO:0005200 structural constituent of cytoskeleton | GO:0003779 actin binding | GO:0005524 ATP binding |	GO:0030479 actin cortical patch | GO:0001411 hyphal tip | GO:0005885 Arp2/3 protein complex | GO:0001950 plasma membrane enriched fraction |
orf19.6316	0.869657	0.762858	1.47755	0.340695		1.699	Predicted membrane transporter, member of the L-amino acid transporter-3 (LAT3) family, major facilitator superfamily (MFS)	GO:0015807 L-amino acid transport |	GO:0015179 L-amino acid transmembrane transporter activity |	GO:0000324 fungal-type vacuole | GO:0005739 mitochondrion | GO:0016020 membrane |
orf19.4907	0.682083	0.750206	1.15722	0.939082		1.69659	Predicted ORF in Assemblies 19, 20 and 21; increased transcription is observed upon fluphenazine treatment; possibly transcriptionally regulated by Tac1p; induced by nitric oxide; fungal-specific (no human or murine homolog)	GO:0008361 regulation of cell size |		GO:0005737 cytoplasm |
orf19.4423	0.90096	0.651996	1.52841	0.445704		1.69642	Predicted ORF in Assemblies 19, 20 and 21	GO:0006915 apoptosis |		GO:0005739 mitochondrion | GO:0005886 plasma membrane |
orf19.7321	0.602623	0.0399827	1.02217	0.778146		1.6962	Predicted ORF in Assemblies 19, 20 and 21
orf19.6077	0.819727	0.0389492	1.39005	0.19267		1.69574	Predicted ORF in Assemblies 19, 20 and 21; shows colony morphology-related gene regulation by Ssn6p			GO:0001950 plasma membrane enriched fraction |
orf19.6608	1.22233	0.284026	2.07021	0.24594		1.69366	Predicted ORF in Assemblies 19, 20 and 21; downregulation correlates with clinical development of fluconazole resistance
orf19.4390	1.07936	0.900913	1.82539	0.483685		1.69117	Predicted ORF in Assemblies 19, 20 and 21; transcription is repressed in response to alpha pheromone in SpiderM medium; transcriptionally activated by Mnl1p under weak acid stress
orf19.6109	0.67101	0.494526	1.13471	0.85322	TUP1	1.69105	Transcriptional corepressor; represses filamentous growth, regulates phase switching, roles in germ tube induction, farnesol response; has C-terminal WD40 repeats; farnesol upregulated in biofilm; in repression pathways with Nrg1p, Rfg1p	GO:0016481 negative regulation of transcription | GO:0009405 pathogenesis | GO:0030448 hyphal growth | GO:0044409 entry into host | GO:0016337 cell-cell adhesion | GO:0030447 filamentous growth | GO:0006350 transcription | GO:0000122 negative regulation of transcription from RNA polymerase II promoter | GO:0009372 quorum sensing | GO:0045827 negative regulation of isoprenoid metabolic process | G…	GO:0016564 transcription repressor activity | GO:0016565 general transcriptional repressor activity |	GO:0005625 soluble fraction | GO:0017053 transcriptional repressor complex |
orf19.4862	1.22221	0.0247553	2.06544	0.0538831		1.68993	Predicted ORF in Assemblies 19, 20 and 21	GO:0016192 vesicle-mediated transport |		GO:0030173 integral to Golgi membrane |
orf19.4993	0.764449	0.776523	1.29095	0.600357	SEC18	1.68874	Functional homolog of S. cerevisiae Sec18p, which acts in protein transport; conserved ATP binding site; not glycosylated	GO:0048193 Golgi vesicle transport | GO:0043001 Golgi to plasma membrane protein transport | GO:0006888 ER to Golgi vesicle-mediated transport | GO:0009306 protein secretion | GO:0034727 piecemeal microautophagy of nucleus | GO:0042144 vacuole fusion, non-autophagic | GO:0000011 vacuole inheritance |	GO:0005524 ATP binding | GO:0016887 ATPase activity |	GO:0043332 mating projection tip | GO:0005737 cytoplasm | GO:0019897 extrinsic to plasma membrane |
orf19.2942	1.62096	0.0688349	2.73636	0.0848171	DIP5	1.68811	Putative permease for dicarboxylic amino acids; mutation confers hypersensitivity to toxic ergosterol analog; transcriptionally induced upon phagocytosis by macrophage; Gcn4p-regulated; upregulated by Rim101p at pH 8	GO:0042493 response to drug | GO:0006865 amino acid transport |	GO:0015171 amino acid transmembrane transporter activity |	GO:0005886 plasma membrane |
orf19.4361	0.733023	0.0235807	1.23685	0.25613	IFF3	1.68733	Putative GPI-anchored protein of unknown function			GO:0009986 cell surface |
orf19.4829	0.780093	0.229964	1.31557	0.675124	DOA1	1.68642	Protein with WD-repeats and a mellitin-like sequence, similar to S. cerevisiae Doa1p, which is involved in ubiquitin-mediated protein degradation	GO:0006511 ubiquitin-dependent protein catabolic process | GO:0006303 double-strand break repair via nonhomologous end joining |	GO:0004620 phospholipase activity | GO:0043130 ubiquitin binding |	GO:0005634 nucleus | GO:0005737 cytoplasm |
orf19.6191	0.73104	0.0066049	1.2328	0.00264847	TLO8	1.68636	Member of a family of telomere-proximal genes of unknown function; may be spliced in vivo
orf19.4883	0.854297	0.764958	1.44033	0.395835		1.68598	Predicted ORF in Assemblies 19, 20 and 21; constitutive expression independent of MTL or white-opaque status
orf19.7619	0.976593	0.649331	1.64642	0.0982884		1.68588	Predicted ORF in Assemblies 19, 20 and 21
orf19.4774	0.822862	0.614653	1.38693	0.36267	AOX1	1.6855	Alternative oxidase; low abundance; constitutively expressed; one of two isoforms (Aox1p and Aox2p); involved in a cyanide-resistant respiratory pathway present in plants, protists, and some fungi, although absent from S. cerevisiae	GO:0045333 cellular respiration | GO:0009060 aerobic respiration |	GO:0009916 alternative oxidase activity |	GO:0005743 mitochondrial inner membrane | GO:0005739 mitochondrion |
orf19.2382	0.995642	0.987622	1.67461	0.121609		1.68194	Predicted ORF in Assemblies 19, 20 and 21; similar to isoleucyl-tRNA synthetase; isoleucyl-tRNA synthetase is the target of drugs including the cyclic beta-amino acid icofungipen/PLD-118/BAY-10-8888 and mupirocin	GO:0032543 mitochondrial translation |		GO:0005739 mitochondrion |
orf19.3216	0.95539	0.87936	1.60632	0.0766443		1.68132	Similar to Rab GTPase activators
orf19.4800	0.83532	0.710827	1.40277	0.487916	RIM20	1.67932	Protein involved in the pH response pathway; binds to the transcription factor Rim101p and may serve as a scaffold to facilitate the C-terminal proteolytic cleavage that activates Rim101p; required for alkaline pH-induced hyphal growth	GO:0030447 filamentous growth | GO:0030448 hyphal growth | GO:0009268 response to pH | GO:0010226 response to lithium ion | GO:0006508 proteolysis | GO:0030435 sporulation resulting in formation of a cellular spore | GO:0016485 protein processing | GO:0001403 invasive growth in response to glucose limitation |		GO:0005634 nucleus | GO:0005737 cytoplasm |
orf19.2014	0.627376	0.227453	1.05327	0.880287	BCY1	1.67886	Regulatory subunit of protein kinase A; required for nuclear localization of Tpk1p; physically interacts with Tpk1p; essential for viability; apoptosis-regulated; bcy1 heterozygous or bcy1 tpk2 mutant has filamentous growth defect	GO:0030448 hyphal growth | GO:0008104 protein localization | GO:0030447 filamentous growth | GO:0007165 signal transduction | GO:0009408 response to heat | GO:0007124 pseudohyphal growth | GO:0046580 negative regulation of Ras protein signal transduction |	GO:0008603 cAMP-dependent protein kinase regulator activity | GO:0004862 cAMP-dependent protein kinase inhibitor activity |	GO:0005634 nucleus | GO:0005737 cytoplasm | GO:0005886 plasma membrane |
orf19.2805	0.653698	0.59521	1.09733	0.752506		1.67865	Predicted ORF in Assemblies 19, 20 and 21; expression regulated during planktonic growth
orf19.5114.1	1.24322	0.85817	2.08669	0.51878		1.67846	ORF added to Assembly 21 based on comparative genome analysis
orf19.3862	0.492872	0.362379	0.827235	0.805566		1.6784	Predicted ORF in Assemblies 19, 20 and 21; heterozygous null mutant displays sensitivity to rapamycin	GO:0031505 fungal-type cell wall organization | GO:0001558 regulation of cell growth | GO:0031930 mitochondrial signaling pathway | GO:0030950 establishment or maintenance of actin cytoskeleton polarity | GO:0031929 TOR signaling pathway | GO:0006810 transport |	GO:0030295 protein kinase activator activity | GO:0005515 protein binding |	GO:0000300 peripheral to membrane of membrane fraction | GO:0031932 TORC2 complex | GO:0031931 TORC1 complex | GO:0010008 endosome membrane | GO:0031234 extrinsic to internal side of plasma membrane | GO:0000139 Golgi membrane |
orf19.5752	0.747004	0.681163	1.25285	0.11997		1.67717	Predicted ORF in Assemblies 19, 20 and 21	GO:0031146 SCF-dependent proteasomal ubiquitin-dependent protein catabolic process |	GO:0004842 ubiquitin-protein ligase activity |	GO:0019005 SCF ubiquitin ligase complex |
orf19.7583	0.740002	0.662159	1.23789	0.642359		1.67282	Putative transcription factor with zinc cluster DNA-binding motif; not essential for viability; filament induced	GO:0006356 regulation of transcription from RNA polymerase I promoter | GO:0006355 regulation of transcription, DNA-dependent |	GO:0003704 specific RNA polymerase II transcription factor activity | GO:0003700 transcription factor activity |	GO:0005634 nucleus |
orf19.5525	0.96754	0.938732	1.61748	0.092579		1.67174	Protein abundance is affected by URA3 expression in the CAI-4 strain background; regulated by Efg1p and Efh1p; repressed by Rgt1p; protein detected by mass spec in exponential and stationary phase cultures			GO:0005634 nucleus | GO:0005737 cytoplasm |
orf19.2496	0.81367	0.770194	1.36016	0.0387015		1.67164	Predicted ORF in Assemblies 19, 20 and 21; fluconazole-downregulated			GO:0016020 membrane |
orf19.3601	0.931435	0.812095	1.55699	0.213648		1.67161	Predicted ORF in Assemblies 19, 20 and 21	GO:0006260 DNA replication |	GO:0004386 helicase activity | GO:0016887 ATPase activity |
orf19.5999	0.879416	0.297282	1.46929	0.00179051	DYN1	1.67076	Dynein heavy chain; dynein is a motor protein that moves toward the microtubule minus end; required for wild-type yeast-form cell separation, spindle positioning, nuclear migration, hyphal growth; transcription is regulated by Mig1p	GO:0040001 establishment of mitotic spindle localization | GO:0040023 establishment of nucleus localization | GO:0030448 hyphal growth | GO:0000132 establishment of mitotic spindle orientation | GO:0000920 cell separation during cytokinesis | GO:0030473 nuclear migration along microtubule | GO:0000022 mitotic spindle elongation | GO:0000070 mitotic sister chromatid segregation |	GO:0008569 minus-end-directed microtubule motor activity |	GO:0030286 dynein complex | GO:0005816 spindle pole body | GO:0005881 cytoplasmic microtubule |
orf19.2241	1.09505	0.913806	1.82896	0.675593	PST1	1.67021	Protein described as 1,4-benzoquinone reductase; biofilm induced; hyphal-induced expression, regulated by Cyr1p, Ras1p, Efg1p, Nrg1p, Rfg1p, Tup1p		GO:0016655 oxidoreductase activity, acting on NADH or NADPH, quinone or similar compound as acceptor |
orf19.2724	1.34387	0.0398995	2.24095	0.301858		1.66754	Predicted ORF in Assemblies 19, 20 and 21
orf19.4939	0.56444	0.320382	0.940772	0.477558		1.66674	Predicted ORF in Assemblies 19, 20 and 21	GO:0006897 endocytosis | GO:0006623 protein targeting to vacuole | GO:0006895 Golgi to endosome transport |	GO:0005085 guanyl-nucleotide exchange factor activity |	GO:0005768 endosome | GO:0019898 extrinsic to membrane |
orf19.4371	0.577854	0.337838	0.962711	0.852106	TAL1	1.66601	Predicted ORF in Assemblies 19, 20 and 21; biofilm induced; oxidative stress-induced via Cap1p; induced by nitric oxide in yhb1 mutant; protein detected by mass spec in exponential and stationary phase cultures	GO:0006098 pentose-phosphate shunt |	GO:0004801 transaldolase activity |	GO:0005737 cytoplasm |
orf19.3631	0.913431	0.405214	1.52136	0.278944		1.66554	Predicted ORF in Assemblies 19, 20 and 21; possibly spurious ORF (Annotation Working Group prediction)
orf19.1135	0.892367	0.634152	1.48538	0.205588	CAS1	1.66454	Putative transcription factor with beta-barrel DNA-binding motif; mutation causes marginal increase in caspofungin sensitivity	GO:0006355 regulation of transcription, DNA-dependent | GO:0000727 double-strand break repair via break-induced replication | GO:0030466 chromatin silencing at silent mating-type cassette | GO:0006303 double-strand break repair via nonhomologous end joining | GO:0000723 telomere maintenance | GO:0006333 chromatin assembly or disassembly |	GO:0003700 transcription factor activity | GO:0003723 RNA binding |	GO:0005635 nuclear envelope | GO:0043564 Ku70 |
orf19.7579	0.995402	0.994184	1.65656	0.478302	FGR34	1.66421	Protein lacking an ortholog in S. cerevisiae; transposon mutation affects filamentous growth	GO:0030447 filamentous growth |
orf19.2454	2.01879	0.370802	3.35687	0.456517	PHO87	1.66281	Protein similar to phosphate permeases; transcription is negatively regulated by Rim101p at pH 8; expression is regulated upon white-opaque switching; caspofungin repressed; biofilm-regulated; virulence-group-correlated expression	GO:0006817 phosphate transport |	GO:0015114 phosphate transmembrane transporter activity |	GO:0016020 membrane |
orf19.4594	0.660314	0.357333	1.09759	0.863567		1.66222	Predicted ORF in Assemblies 19, 20 and 21	GO:0006897 endocytosis |	GO:0005198 structural molecule activity |	GO:0030125 clathrin vesicle coat |
orf19.3213	0.887478	0.609482	1.47507	0.195795		1.66209	Predicted ORF in Assemblies 19, 20 and 21
orf19.4061	0.643015	0.501032	1.06844	0.615456		1.66161	Predicted ORF in Assemblies 19, 20 and 21; clade-associated gene expression			GO:0005737 cytoplasm |
orf19.1252	0.765573	0.362365	1.27143	0.00523787	YME1	1.66075	Protein not essential for viability; similar to S. cerevisiae Yme1p, which is a mitochondrial inner membrane protease of the AAA family	GO:0007005 mitochondrion organization | GO:0006515 misfolded or incompletely synthesized protein catabolic process | GO:0001300 chronological cell aging |	GO:0004176 ATP-dependent peptidase activity |	GO:0031942 i-AAA complex |
orf19.1424	0.656995	0.565639	1.09032	0.703597		1.65955	Predicted membrane transporter, member of the oxalate:formate antiporter (OFA) family, major facilitator superfamily (MFS)	GO:0019532 oxalate transport |	GO:0019531 oxalate transmembrane transporter activity |	GO:0005739 mitochondrion | GO:0016020 membrane |
orf19.4495	1.0032	0.996398	1.66484	0.345812	NDH51	1.65952	Subunit of nicotinamide adenine dinucleotide dehydrogenase complex I, of the mitochondrial electron transport chain; required for wild-type filamentous growth; alkaline downregulated	GO:0009060 aerobic respiration | GO:0030447 filamentous growth | GO:0042710 biofilm formation |	GO:0008137 NADH dehydrogenase (ubiquinone) activity |	GO:0005747 mitochondrial respiratory chain complex I | GO:0005624 membrane fraction | GO:0005886 plasma membrane |
orf19.3674	0.871588	0.649696	1.44411	0.00326939	GAL102	1.65687	Predicted ORF in Assemblies 19, 20 and 21; mutation confers hypersensitivity to toxic ergosterol analog	GO:0006012 galactose metabolic process | GO:0042493 response to drug |	GO:0003978 UDP-glucose 4-epimerase activity |	GO:0005737 cytoplasm |
orf19.2619	1.27012	0.0271196	2.10371	0.387326	PHO113	1.6563	Protein described as a constitutive acid phosphatase; transcription is negatively regulated by Rim101p; DTT-extractable; N-glycosylated	GO:0015888 thiamin transport |	GO:0003993 acid phosphatase activity |	GO:0030287 cell wall-bounded periplasmic space | GO:0009986 cell surface | GO:0005576 extracellular region |
orf19.1950	0.811655	0.570763	1.34424	0.689797		1.65617	Predicted ORF in Assemblies 19, 20 and 21		GO:0016791 phosphatase activity |
orf19.6261	0.734939	0.362067	1.21707	0.338559	BPH1	1.65602	Protein not essential for viability; similar to S. cerevisiae Bph1p, which is a putative ortholog of human Chediak-Higashi syndrome protein and murine beige gene implicated in disease syndromes involving defective lysosomal trafficking
orf19.6563.1	1.05502	0.679184	1.74619	0.0221065		1.65513	ORF Predicted by Annotation Working Group			GO:0005739 mitochondrion |
orf19.5334	0.921219	0.933301	1.52416	0.641109		1.65451	Predicted ORF in Assemblies 19, 20 and 21; transcription regulated upon yeast-hyphal switch
orf19.203	0.818716	0.539833	1.35441	0.0931229	STB3	1.65432	Predicted ORF in Assemblies 19, 20 and 21; caspofungin induced; macrophage/pseudohyphal-repressed	GO:0000432 positive regulation of transcription from RNA polymerase II promoter by glucose |	GO:0043565 sequence-specific DNA binding |	GO:0005634 nucleus | GO:0005737 cytoplasm |
orf19.7670	1.07464	0.868304	1.77762	0.233629		1.65416	Putative Ca2+/H+ antiporter; fungal-specific (no human or murine homolog)	GO:0006814 sodium ion transport | GO:0006813 potassium ion transport |	GO:0015386 potassium | GO:0015385 sodium |	GO:0000324 fungal-type vacuole | GO:0005886 plasma membrane |
orf19.2990	1.50828	0.491186	2.4933	0.0025104	XOG1	1.65308	Exo-1,3-beta-glucanase, major exoglucanase; member of family 5 glycosyl hydrolases; affects sensitivity to inhibitors of chitin and glucan synthesis; not required for yeast-to-hyphal transition or for virulence in mouse systemic infection	GO:0007047 cell wall organization | GO:0006073 cellular glucan metabolic process |	GO:0004338 glucan 1,3-beta-glucosidase activity |	GO:0005576 extracellular region | GO:0009277 fungal-type cell wall |
orf19.669	0.83595	0.236568	1.38038	0.377734	PRM1	1.65126	Protein induced during the mating process	GO:0032220 plasma membrane fusion during cytogamy | GO:0019236 response to pheromone |		GO:0016021 integral to membrane | GO:0043332 mating projection tip |
orf19.7479	0.877328	0.77711	1.44856	0.203273	NTH1	1.6511	Neutral trehalase; hyphal induction in homozygous null mutant is delayed but not reduced overall; not required for virulence in mouse systemic infection; homodimeric enzyme; possible regulatory cAMP-dependent phosphorylation at S10 and S213	GO:0005993 trehalose catabolic process | GO:0006950 response to stress |	GO:0015927 trehalase activity | GO:0004555 alpha,alpha-trehalase activity |	GO:0005829 cytosol |
orf19.109	0.789426	0.709076	1.30243	0.693075		1.64985	Predicted ORF in Assemblies 19, 20 and 21		GO:0004831 tyrosine-tRNA ligase activity |	GO:0005739 mitochondrion |
orf19.3392	0.86383	0.695258	1.42475	0.362165	DOG1	1.64934	Putative 2-deoxyglucose-6-phosphatase; haloacid dehalogenase hydrolase/phosphatase superfamily; similar to S. cerevisiae Dog1p, Dog2p, Hor1p, and Rhr2p; regulated by Nrg1p, Tup1p	GO:0006006 glucose metabolic process | GO:0030433 ER-associated protein catabolic process |	GO:0003850 2-deoxyglucose-6-phosphatase activity |	GO:0005634 nucleus | GO:0005737 cytoplasm |
orf19.2808	0.98392	0.971188	1.62253	0.157359		1.64905	Predicted zinc-finger protein of unknown function, not essential for viability		GO:0003700 transcription factor activity |
orf19.5526	0.929981	0.904741	1.53316	0.563503	SEC20	1.64859	Essential protein; similar to S. cerevisiae Sec20p; depletion causes membrane accumulation and drug sensitivity; expression regulated by growth phase; O-mannosylation regulates proteolysis; does not complement S. cerevisiae sec20-1 mutant	GO:0042493 response to drug | GO:0007047 cell wall organization | GO:0006890 retrograde vesicle-mediated transport, Golgi to ER | GO:0006906 vesicle fusion |	GO:0005515 protein binding |	GO:0016021 integral to membrane | GO:0005783 endoplasmic reticulum | GO:0005789 endoplasmic reticulum membrane |
orf19.540	0.859174	0.775993	1.41594	0.540539		1.64803	Predicted ORF in Assemblies 19, 20 and 21
orf19.1795.1	1.13337	0.229458	1.86677	0.203857		1.64709	ORF added to Assembly 21 based on comparative genome analysis
orf19.2863.1	0.874296	0.447902	1.43925	0.0101148		1.64618	ORF Predicted by Annotation Working Group	GO:0045041 protein import into mitochondrial intermembrane space | GO:0006879 cellular iron ion homeostasis | GO:0006979 response to oxidative stress |	GO:0016971 flavin-linked sulfhydryl oxidase activity |	GO:0005758 mitochondrial intermembrane space |
orf19.4945	0.979168	0.85175	1.61079	0.0621698	MSH6	1.64506	Protein similar to S. cerevisiae Msh6p, which is involved in mismatch repair; repressed under Cdc5p depletion	GO:0000710 meiotic mismatch repair |	GO:0032138 single base insertion or deletion binding | GO:0032137 guanine/thymine mispair binding | GO:0016887 ATPase activity | GO:0000400 four-way junction DNA binding | GO:0005524 ATP binding |	GO:0032301 MutSalpha complex |
orf19.6437	0.86577	0.0818782	1.42311	0.011409	CDC23	1.64375	Similar to anaphase-promoting complex component; possibly transcriptionally regulated by Tac1p	GO:0000022 mitotic spindle elongation | GO:0007091 mitotic metaphase/anaphase transition | GO:0000070 mitotic sister chromatid segregation | GO:0008054 cyclin catabolic process | GO:0016567 protein ubiquitination | GO:0031145 anaphase-promoting complex-dependent proteasomal ubiquitin-dependent protein catabolic process |	GO:0004842 ubiquitin-protein ligase activity | GO:0005515 protein binding |	GO:0005680 anaphase-promoting complex |
orf19.2050	0.908666	0.812739	1.49265	0.0768232		1.64268	Predicted ORF in Assemblies 19, 20 and 21	GO:0016125 sterol metabolic process |	GO:0004771 sterol esterase activity |	GO:0005811 lipid particle | GO:0016021 integral to membrane |
orf19.4732	0.643545	0.0179043	1.05589	0.0222641	SEC24	1.64075	Possible role in ER to Golgi transport; induced upon yeast-hyphal switch	GO:0006888 ER to Golgi vesicle-mediated transport | GO:0006914 autophagy |	GO:0005515 protein binding |	GO:0030127 COPII vesicle coat |
orf19.4411	0.899395	0.640291	1.47565	0.157745	HOS1	1.64072	Histone deacetylase; similar to S. cerevisiae Hos1p; has conserved deacetylation motif; slightly greater expression in white cells than in opaque cells	GO:0006355 regulation of transcription, DNA-dependent | GO:0006476 protein amino acid deacetylation | GO:0006325 chromatin organization | GO:0010552 positive regulation of gene-specific transcription from RNA polymerase II promoter |	GO:0004407 histone deacetylase activity |	GO:0000118 histone deacetylase complex |
orf19.5730	0.98518	0.744121	1.61425	0.392616		1.63854	Predicted ORF in Assemblies 19, 20 and 21; clade-associated gene expression			GO:0005737 cytoplasm |
orf19.1440	0.802351	0.304092	1.31457	0.0188493		1.6384	Predicted ORF in Assemblies 19, 20 and 21; possibly spurious ORF (Annotation Working Group prediction)
orf19.4449	0.564532	0.278848	0.923966	0.646795	CCS1	1.63669	Predicted ORF in Assemblies 19, 20 and 21	GO:0015680 intracellular copper ion transport |	GO:0016532 superoxide dismutase copper chaperone activity |	GO:0005829 cytosol | GO:0005634 nucleus | GO:0005743 mitochondrial inner membrane |
orf19.4182	0.903037	0.788958	1.47677	0.567383		1.63533	Predicted ORF in Assemblies 19, 20 and 21
orf19.388	0.936869	0.834183	1.52931	0.27615	CAF16	1.63237	ABC family protein, predicted not to be a transporter; caspofungin repressed	GO:0006810 transport | GO:0006355 regulation of transcription, DNA-dependent |	GO:0042626 ATPase activity, coupled to transmembrane movement of substances | GO:0005524 ATP binding |	GO:0005737 cytoplasm | GO:0030014 CCR4-NOT complex |
orf19.213	0.68449	0.49449	1.11609	0.1918		1.63054	Predicted ORF in Assemblies 19, 20 and 21	GO:0006511 ubiquitin-dependent protein catabolic process |		GO:0005634 nucleus | GO:0008541 proteasome regulatory particle, lid subcomplex | GO:0034515 proteasome storage granule |
orf19.7527	0.885807	0.62853	1.44193	0.461446		1.62782	Predicted ORF in Assemblies 19, 20 and 21
orf19.951	1.34918	0.0343472	2.19455	0.273784		1.62658	Predicted ORF in Assemblies 19, 20 and 21; transcription downregulated upon yeast-hyphal switch; fluconazole-induced; possibly spurious ORF (Annotation Working Group prediction)
orf19.4309	0.550242	0.371732	0.894953	0.131875	GRP2	1.62647	Similar to S. cerevisiae Gre2p (methylglyoxal reductase); antigenic in human; regulation associated with azole resistance; induced in core stress response or by oxidative stress (via Cap1p), fluphenazine, benomyl, or fluconazole (long term)		GO:0016491 oxidoreductase activity |	GO:0005625 soluble fraction |
orf19.4731	0.727148	0.221402	1.18267	0.114798		1.62646	Predicted ORF in Assemblies 19, 20 and 21	GO:0006891 intra-Golgi vesicle-mediated transport |		GO:0017119 Golgi transport complex |
orf19.5773	0.694299	0.574479	1.12912	0.719032		1.62627	Predicted ORF in Assemblies 19, 20 and 21; Hog1p-induced; clade-associated gene expression; protein detected by mass spec in exponential and stationary phase cultures			GO:0005634 nucleus | GO:0005737 cytoplasm |
orf19.1796	0.973134	0.939874	1.58219	0.113913		1.62587	Predicted ORF in Assemblies 19, 20 and 21	GO:0008152 metabolic process |	GO:0016616 oxidoreductase activity, acting on the CH-OH group of donors, NAD or NADP as acceptor |
orf19.3705	0.84282	0.277085	1.37	0.322965	PTC6	1.62549	Putative protein phosphatase of the Type 2C-related family (serine/threonine-specific), similar to S. cerevisiae Ptc6p; mutant shows virulence defect	GO:0016236 macroautophagy | GO:0043085 positive regulation of catalytic activity | GO:0006470 protein amino acid dephosphorylation | GO:0000422 mitochondrion degradation |	GO:0004722 protein serine/threonine phosphatase activity |	GO:0005759 mitochondrial matrix | GO:0005758 mitochondrial intermembrane space |
orf19.5908	1.35791	0.697215	2.20364	0.477575	TEC1	1.62282	TEA/ATTS transcription factor involved in regulation of hypha-specific genes; required for wild-type biofilm formation; regulates BCR1; directly transcriptionally regulated by Cph2p under some growth conditions; alkaline upregulated	GO:0030448 hyphal growth | GO:0009405 pathogenesis | GO:0007124 pseudohyphal growth | GO:0006355 regulation of transcription, DNA-dependent | GO:0045944 positive regulation of transcription from RNA polymerase II promoter | GO:0044011 single-species biofilm formation on inanimate substrate | GO:0007155 cell adhesion | GO:0044406 adhesion to host |	GO:0003704 specific RNA polymerase II transcription factor activity | GO:0003700 transcription factor activity |	GO:0005634 nucleus |
orf19.7184	1.0139	0.939346	1.64407	0.149203		1.62152	Predicted ORF in Assemblies 19, 20 and 21	GO:0045324 late endosome to vacuole transport |		GO:0005770 late endosome |
orf19.1891	0.660519	0.247885	1.0709	0.677027	APR1	1.6213	Vacuolar aspartic proteinase; mRNA abundance is equivalent in yeast-form and mycelial cells but is elevated at lower growth temperatures; upregulated in the presence of human neutrophils; detected by mass spec in stationary phase cultures	GO:0016237 microautophagy | GO:0030435 sporulation resulting in formation of a cellular spore | GO:0009267 cellular response to starvation | GO:0007039 vacuolar protein catabolic process | GO:0051603 proteolysis involved in cellular protein catabolic process |	GO:0004175 endopeptidase activity |	GO:0000324 fungal-type vacuole | GO:0005739 mitochondrion |
orf19.6629	1.03655	0.711311	1.68029	0.464594	ISC1	1.62104	Putative phospholipase C, possible neutral sphingomyelinase; not essential for viability	GO:0006644 phospholipid metabolic process | GO:0009651 response to salt stress | GO:0046513 ceramide biosynthetic process | GO:0030149 sphingolipid catabolic process |	GO:0004629 phospholipase C activity |	GO:0005783 endoplasmic reticulum | GO:0031307 integral to mitochondrial outer membrane |
orf19.4577	0.787048	0.52459	1.27323	0.139731		1.61773	Predicted ORF in Assemblies 19, 20 and 21	GO:0007165 signal transduction |	GO:0004871 signal transducer activity |
orf19.5367	0.90168	0.384431	1.45867	0.254711	RDH54	1.61772	Protein described as having role in DNA recombination, repair; transcriptionally induced by interaction with macrophage	GO:0000727 double-strand break repair via break-induced replication | GO:0045144 meiotic sister chromatid segregation | GO:0030491 heteroduplex formation | GO:0007131 reciprocal meiotic recombination | GO:0032392 DNA geometric change |	GO:0003916 DNA topoisomerase activity | GO:0015616 DNA translocase activity |
orf19.279	0.717254	0.614321	1.16018	0.340936		1.61753	Predicted ORF in Assemblies 19, 20 and 21	GO:0019478 D-amino acid catabolic process |	GO:0016788 hydrolase activity, acting on ester bonds |
orf19.3983	0.990037	0.960948	1.60083	0.09148		1.61693	Predicted ORF in Assemblies 19, 20 and 21			GO:0005886 plasma membrane | GO:0005741 mitochondrial outer membrane |
orf19.3554	1.04259	0.664425	1.68471	0.531203	AAT1	1.61589	Protein described as aspartate aminotransferase; soluble protein in hyphae; macrophage-induced protein; alkaline upregulated; amphotericin B repressed; gene used for strain identification by multilocus sequence typing, farnesol-induced	GO:0006536 glutamate metabolic process | GO:0006533 aspartate catabolic process |	GO:0004069 L-aspartate |	GO:0005625 soluble fraction | GO:0005737 cytoplasm |
orf19.4445	0.647966	0.538835	1.04694	0.964354		1.61573	Predicted ORF in Assemblies 19, 20 and 21; Plc1p-regulated	GO:0030447 filamentous growth |
orf19.6308	0.987745	0.867629	1.59541	0.323334		1.61521	Predicted ORF in Assemblies 19, 20 and 21
orf19.3289	0.977057	0.952194	1.57771	0.513101		1.61476	Phosphorylated protein of unknown function; predicted ORF in Assemblies 19, 20 and 21
orf19.6816	0.748468	0.77965	1.20804	0.0214031		1.61402	Predicted ORF in Assemblies 19, 20 and 21	GO:0042843 D-xylose catabolic process | GO:0019568 arabinose catabolic process | GO:0006979 response to oxidative stress |	GO:0004032 aldehyde reductase activity |	GO:0005634 nucleus | GO:0005737 cytoplasm |
orf19.6035	0.922995	0.462643	1.48801	0.092002		1.61215	Predicted ORF in Assemblies 19, 20 and 21; repressed by nitric oxide
orf19.6208	0.982262	0.509328	1.58321	0.153694	MEF2	1.6118	Predicted ORF in Assemblies 19, 20 and 21; caspofungin induced	GO:0006414 translational elongation |	GO:0003746 translation elongation factor activity |	GO:0005739 mitochondrion |
orf19.1562	0.989757	0.88356	1.59326	0.528908		1.60975	Predicted ORF in Assemblies 19, 20 and 21; transcription is repressed in response to alpha pheromone in SpiderM medium
orf19.5102	0.945435	0.260453	1.52144	0.531101	PLB5	1.60925	Putative phospholipase B, fungal-specific (no human or murine homolog); null mutation eliminates cell-associated phospholipase A2 activity and attenuates virulence; putative GPI anchor	GO:0030384 phosphoinositide metabolic process | GO:0006644 phospholipid metabolic process |	GO:0004622 lysophospholipase activity | GO:0004623 phospholipase A2 activity |	GO:0009986 cell surface | GO:0005576 extracellular region | GO:0005886 plasma membrane |
orf19.3004	0.872991	0.613702	1.40467	0.205162		1.60903	Predicted ORF in Assemblies 19, 20 and 21
orf19.7519	0.596866	0.400383	0.959176	0.677032		1.60702	Predicted ORF in Assemblies 19, 20 and 21
orf19.6423	0.820487	0.422259	1.31804	0.434758		1.60641	Predicted ORF in Assemblies 19, 20 and 21	GO:0006094 gluconeogenesis | GO:0006006 glucose metabolic process |	GO:0003873 6-phosphofructo-2-kinase activity | GO:0004331 fructose-2,6-bisphosphate 2-phosphatase activity |	GO:0005829 cytosol |
orf19.3610	0.990128	0.928726	1.58961	0.311846		1.60546	Predicted ORF in Assemblies 19, 20 and 21; upregulation correlates with clinical development of fluconazole resistance
orf19.2792	1.07548	0.820789	1.72588	0.370687	IST2	1.60475	Predicted ORF in Assemblies 19, 20 and 21		GO:0008289 lipid binding |	GO:0033101 cellular bud membrane |
orf19.371	0.625752	0.389253	1.00345	0.976326		1.60359	Predicted ORF in Assemblies 19, 20 and 21
orf19.2873	0.82448	0.0335533	1.32205	0.145538	TOP2	1.60349	DNA topoisomerase II; catalyzes ATP-dependent DNA relaxation and decatenation in vitro; Y842 predicted to be catalytic; functional homolog of S. cerevisiae Top2p; sensitive to amsacrine or doxorubicin; farnesol-upregulated in biofilm	GO:0045950 negative regulation of mitotic recombination | GO:0006265 DNA topological change | GO:0007131 reciprocal meiotic recombination | GO:0006271 DNA strand elongation during DNA replication | GO:0000019 regulation of mitotic recombination | GO:0031055 chromatin remodeling at centromere | GO:0006333 chromatin assembly or disassembly |	GO:0003918 DNA topoisomerase (ATP-hydrolyzing) activity |	GO:0005739 mitochondrion | GO:0000795 synaptonemal complex |
orf19.3281	0.61829	0.207676	0.991145	0.990036		1.60304	Predicted ORF in Assemblies 19, 20 and 21	GO:0016577 histone demethylation |	GO:0051864 histone demethylase activity (H3-K36 specific) | GO:0035064 methylated histone residue binding |
orf19.2613	1.28379	0.0989313	2.05289	0.576458	ECM4	1.59908	Protein similar to S. cerevisiae Ecm4p; transcription is regulated by Nrg1p and Tup1p; induced in core stress response or in cyr1 or ras1 homozygous null mutant (yeast-form or hyphal cells); transposon mutation affects filamentous growth	GO:0030447 filamentous growth | GO:0007047 cell wall organization |	GO:0004364 glutathione transferase activity |	GO:0005737 cytoplasm |
orf19.7404	0.969048	0.864846	1.54957	0.223652		1.59906	Predicted ORF in Assemblies 19, 20 and 21	GO:0009071 serine family amino acid catabolic process | GO:0006567 threonine catabolic process |	GO:0003941 L-serine ammonia-lyase activity | GO:0004794 L-threonine ammonia-lyase activity |	GO:0042645 mitochondrial nucleoid |
orf19.4950	0.755662	0.564962	1.2082	0.582547	AKR1	1.59886	Ankyrin-repeat protein; increased transcription is observed upon fluphenazine treatment	GO:0006897 endocytosis | GO:0018318 protein amino acid palmitoylation | GO:0000750 pheromone-dependent signal transduction involved in conjugation with cellular fusion | GO:0006612 protein targeting to membrane |	GO:0019706 protein-cysteine S-palmitoleyltransferase activity |	GO:0016020 membrane |
orf19.457	0.700722	0.575504	1.11847	0.310083		1.59617	Predicted ORF in Assemblies 19, 20 and 21	GO:0043162 ubiquitin-dependent protein catabolic process via the multivesicular body sorting pathway | GO:0016579 protein deubiquitination |	GO:0004843 ubiquitin-specific protease activity |	GO:0005737 cytoplasm |
orf19.4436	1.04789	0.339378	1.67236	0.147833		1.59594	Predicted ORF in Assemblies 19, 20 and 21	GO:0006979 response to oxidative stress |	GO:0004602 glutathione peroxidase activity |
orf19.5184	0.736286	0.28758	1.17496	0.452021		1.59579	Predicted ORF in Assemblies 19, 20 and 21	GO:0000467 exonucleolytic trimming to generate mature 3'-end of 5.8S rRNA from tricistronic rRNA transcript (SSU-rRNA, 5.8S rRNA, LSU-rRNA) | GO:0000054 ribosome export from nucleus | GO:0006407 rRNA export from nucleus | GO:0000292 RNA fragment catabolic process |	GO:0004871 signal transducer activity |	GO:0000790 nuclear chromatin |
orf19.2690	0.739296	0.379883	1.17968	0.596307		1.59568	Predicted ORF in Assemblies 19, 20 and 21	GO:0008053 mitochondrial fusion | GO:0000002 mitochondrial genome maintenance |	GO:0003924 GTPase activity |	GO:0005739 mitochondrion | GO:0005741 mitochondrial outer membrane | GO:0005758 mitochondrial intermembrane space |
orf19.909.1	0.602049	0.473838	0.959983	0.908992		1.59453	Predicted ORF in Assembly 20 and 21; gene has intron
orf19.1925	0.769108	0.630891	1.22538	0.601344	TLO5	1.59325	Member of a family of telomere-proximal genes of unknown function; may be spliced in vivo
orf19.5805	0.689349	0.326223	1.09825	0.860607	DLD1	1.59316	Putative D-lactate dehydrogenase; transcription is specific to white cell type; shows colony morphology-related gene regulation by Ssn6p; transcription is upregulated in both intermediate and mature biofilms	GO:0005975 carbohydrate metabolic process | GO:0009060 aerobic respiration |	GO:0004458 D-lactate dehydrogenase (cytochrome) activity |	GO:0005743 mitochondrial inner membrane |
orf19.2151	0.833327	0.246821	1.32542	0.238746	NAG6	1.59052	Protein required for wild-type mouse virulence and wild-type cycloheximide resistance; putative GTP-binding motif; similar to S. cerevisiae Yor165Wp; in gene cluster that encodes enzymes of GlcNAc catabolism; no human or murine homolog	GO:0008645 hexose transport | GO:0009405 pathogenesis | GO:0042493 response to drug | GO:0016044 membrane organization |	GO:0005525 GTP binding |	GO:0016020 membrane | GO:0005829 cytosol |
orf19.5862	0.477544	0.239856	0.759492	0.0129725		1.59041	Protein described as related to arginases; downregulated upon adherence to polystyrene; regulated by Gcn2p and Gcn4p	GO:0019547 arginine catabolic process to ornithine |	GO:0004053 arginase activity |
orf19.1816	1.00862	0.972329	1.60283	0.698366	ALS3	1.58914	Adhesin; ALS family; role in epithelial adhesion, endothelial invasiveness; allelic variation in adhesiveness; immunoprotective in mice; predicted GPI-anchor cell wall protein; macrophage, hyphal induced, pH, Nrg1p, Rfg1p, Tup1p regulated	GO:0016337 cell-cell adhesion | GO:0030260 entry into host cell | GO:0007155 cell adhesion | GO:0009405 pathogenesis | GO:0044406 adhesion to host | GO:0000752 agglutination involved in conjugation with cellular fusion | GO:0044011 single-species biofilm formation on inanimate substrate | GO:0043709 cell adhesion during single-species biofilm formation | GO:0043710 cell adhesion during multi-spec…	GO:0050839 cell adhesion molecule binding |	GO:0009277 fungal-type cell wall | GO:0009986 cell surface | GO:0030446 hyphal cell wall | GO:0030445 yeast-form cell wall | GO:0005576 extracellular region |
orf19.3278	1.03069	0.96104	1.6374	0.0132411	GSY1	1.58865	Protein described as glycogen synthase; enzyme of glycogen metabolism; transcription downregulated upon yeast-hyphal switch and regulated by Efg1p; strong oxidative stress induced; shows colony morphology-related gene regulation by Ssn6p	GO:0005978 glycogen biosynthetic process |	GO:0004373 glycogen (starch) synthase activity |	GO:0005739 mitochondrion |
orf19.3140.1	0.743031	0.475298	1.18016	0.425519		1.5883	ORF Predicted by Annotation Working Group	GO:0043248 proteasome assembly | GO:0006974 response to DNA damage stimulus | GO:0006511 ubiquitin-dependent protein catabolic process |	GO:0008538 proteasome activator activity |	GO:0005839 proteasome core complex | GO:0005634 nucleus | GO:0005737 cytoplasm |
orf19.7292	0.781887	0.6842	1.24165	0.655563	ARP2	1.58802	Predicted ORF in Assemblies 19, 20 and 21; mutation confers hypersensitivity to cytochalasin D; regulated by Gcn2p and Gcn4p	GO:0042493 response to drug | GO:0000001 mitochondrion inheritance | GO:0030476 ascospore wall assembly | GO:0034314 Arp2/3 complex-mediated actin nucleation | GO:0006200 ATP catabolic process | GO:0051654 establishment of mitochondrion localization |	GO:0005200 structural constituent of cytoskeleton | GO:0003779 actin binding | GO:0016887 ATPase activity | GO:0005524 ATP binding |	GO:0005885 Arp2/3 protein complex | GO:0005739 mitochondrion |
orf19.7136	0.736026	0.146447	1.16877	0.360968	SPT6	1.58795	Protein similar to S. cerevisiae Spt6p transcription elongation factor; transposon mutation affects filamentous growth; transcription is upregulated in an RHE model of oral candidiasis and in clinical isolates from oral candidiasis	GO:0030447 filamentous growth | GO:0000122 negative regulation of transcription from RNA polymerase II promoter | GO:0006368 RNA elongation from RNA polymerase II promoter | GO:0034401 chromatin organization during transcription | GO:0006334 nucleosome assembly |	GO:0016944 RNA polymerase II transcription elongation factor activity |	GO:0005739 mitochondrion | GO:0008023 transcription elongation factor complex |
orf19.1274	0.745031	0.391752	1.18267	0.118869		1.58741	Predicted ORF in Assemblies 19, 20 and 21
orf19.3545	0.840409	0.228015	1.33342	0.170495		1.58663	Predicted ORF in Assemblies 19, 20 and 21	GO:0006468 protein amino acid phosphorylation | GO:0000910 cytokinesis |	GO:0004672 protein kinase activity |	GO:0005816 spindle pole body |
orf19.7140	0.624525	0.528998	0.989009	0.972629		1.58362	Putative protein of unknown function, transcription is upregulated in clinical isolates from HIV+ patients with oral candidiasis; predicted ORF in Assemblies 19, 20 and 21; protein detected by mass spec in stationary phase cultures
orf19.7502	1.20196	0.502332	1.90314	0.342802		1.58337	Predicted ORF in Assemblies 19, 20 and 21; greater mRNA abundance observed in a cyr1 homozygous null mutant than in wild type; possibly spurious ORF (Annotation Working Group prediction)
orf19.357	0.821933	0.344971	1.30122	0.481886		1.58312	Predicted ORF in Assemblies 19, 20 and 21	GO:0006508 proteolysis | GO:0000001 mitochondrion inheritance | GO:0001302 replicative cell aging | GO:0070584 mitochondrion morphogenesis | GO:0045861 negative regulation of proteolysis | GO:0006457 protein folding | GO:0007007 inner mitochondrial membrane organization |		GO:0005743 mitochondrial inner membrane |
orf19.1840	0.904362	0.560484	1.43147	0.118493		1.58285	Predicted ORF in Assemblies 19, 20 and 21		GO:0008289 lipid binding |	GO:0001950 plasma membrane enriched fraction | GO:0005739 mitochondrion |
orf19.4688	1.30038	0.134166	2.05695	0.468888	DAG7	1.58182	Predicted ORF in Assemblies 19, 20 and 21; mutation confers hypersensitivity to toxic ergosterol analog; a-specific transcription; alpha-factor induced	GO:0042493 response to drug |
orf19.3984	0.942266	0.921927	1.48932	0.0207019		1.58058	Predicted ORF in Assemblies 19, 20 and 21; induced in core caspofungin response; increased expression observed in an ssr1 homozygous null mutant; induced by nitric oxide in yhb1 mutant
orf19.1513	0.79745	0.690398	1.26032	0.652913	FAB1	1.58044	Phosphatidylinositol 3-phosphate 5-kinase; required for hyphal growth on solid media, and for wild-type vacuolar morphology and acidification; not required for wild-type virulence in mouse systemic infection or for adherence to HeLa cells	GO:0007033 vacuole organization | GO:0007035 vacuolar acidification | GO:0030447 filamentous growth | GO:0046854 phosphoinositide phosphorylation | GO:0000011 vacuole inheritance |	GO:0000285 1-phosphatidylinositol-3-phosphate 5-kinase activity | GO:0032266 phosphatidylinositol 3-phosphate binding |	GO:0005739 mitochondrion | GO:0000329 fungal-type vacuole membrane | GO:0010008 endosome membrane |
orf19.5973	0.902828	0.224515	1.42651	0.267821		1.58004	Predicted ORF in Assemblies 19, 20 and 21	GO:0006508 proteolysis | GO:0000001 mitochondrion inheritance | GO:0001302 replicative cell aging | GO:0045861 negative regulation of proteolysis | GO:0006457 protein folding |		GO:0005743 mitochondrial inner membrane | GO:0005886 plasma membrane |
orf19.3936	0.703224	0.199258	1.11094	0.797046		1.57978	Predicted ORF in Assemblies 19, 20 and 21; mutation confers hypersensitivity to 5-fluorouracil (5-FU); induced upon biofilm formation	GO:0042493 response to drug | GO:0046475 glycerophospholipid catabolic process |	GO:0047389 glycerophosphocholine phosphodiesterase activity |	GO:0005737 cytoplasm | GO:0005840 ribosome |
orf19.3290	0.919596	0.540099	1.45263	0.4392		1.57963	Predicted ORF in Assemblies 19, 20 and 21; repressed by nitric oxide			GO:0005886 plasma membrane |
orf19.820	0.823726	0.500317	1.29932	0.35995	SDS22	1.57737	Predicted ORF in Assemblies 19, 20 and 21; macrophage/pseudohyphal-repressed	GO:0007059 chromosome segregation | GO:0051457 maintenance of protein location in nucleus |	GO:0030234 enzyme regulator activity |	GO:0005634 nucleus | GO:0005737 cytoplasm |
orf19.505	0.708608	0.55132	1.11709	0.840253	SRV2	1.57645	Adenylate cyclase-associated protein that regulates adenylate cyclase activity; required for wild-type germ tube formation and for virulence in mouse systemic infection; mutant defects in filamentous growth are rescued by cAMP or dbcAMP	GO:0042493 response to drug | GO:0019933 cAMP-mediated signaling | GO:0030447 filamentous growth | GO:0045761 regulation of adenylate cyclase activity | GO:0009405 pathogenesis | GO:0030448 hyphal growth | GO:0007010 cytoskeleton organization | GO:0007124 pseudohyphal growth | GO:0007265 Ras protein signal transduction |	GO:0008092 cytoskeletal protein binding | GO:0008179 adenylate cyclase binding |	GO:0030479 actin cortical patch | GO:0043332 mating projection tip |
orf19.4294	0.999461	0.996618	1.57528	0.14895		1.57613	Predicted ORF in Assemblies 19, 20 and 21	GO:0045041 protein import into mitochondrial intermembrane space | GO:0018063 cytochrome c-heme linkage | GO:0007006 mitochondrial membrane organization |	GO:0016491 oxidoreductase activity |	GO:0031314 extrinsic to mitochondrial inner membrane |
orf19.4316	0.786735	0.520511	1.23772	0.558506		1.57324	Trimethyllysine dioxygenase, the first enzyme in the carnitine biosynthesis pathway; hyphal-induced expression, regulated by Cyr1p, Ras1p, Efg1p	GO:0045329 carnitine biosynthetic process |	GO:0050353 trimethyllysine dioxygenase activity |
orf19.2467	0.524438	0.430164	0.824936	0.26224	PRN1	1.57299	Protein with similarity to pirins; increased transcription is observed upon benomyl treatment and in response to alpha pheromone in SpiderM medium; transcriptionally activated by Mnl1p under weak acid stress
orf19.3682	1.49075	0.478647	2.34101	0.0930842	CWH8	1.57036	Putative dolichyl pyrophosphate (Dol-P-P) phosphatase; ketoconazole-induced; expression is increased in a fluconazole-resistant isolate; clade-associated gene expression	GO:0008610 lipid biosynthetic process | GO:0006487 protein amino acid N-linked glycosylation |	GO:0016462 pyrophosphatase activity | GO:0047874 dolichyldiphosphatase activity |	GO:0030176 integral to endoplasmic reticulum membrane |
orf19.794	0.959006	0.651562	1.5056	0.361251		1.56996	Predicted ORF in Assemblies 19, 20 and 21	GO:0006468 protein amino acid phosphorylation | GO:0000122 negative regulation of transcription from RNA polymerase II promoter | GO:0070481 nuclear-transcribed mRNA catabolic process, non-stop decay | GO:0045449 regulation of transcription |	GO:0016251 general RNA polymerase II transcription factor activity | GO:0004693 cyclin-dependent protein kinase activity |	GO:0005667 transcription factor complex |
orf19.2571	0.778762	0.766968	1.22171	0.806461	SEC4	1.56878	Small GTPase of Rab family; role in secretion, post-Golgi; possible C-terminal palmitoylation; downregulated on adherence to polystyrene; not regulated on white-opaque or yeast-hyphal switching; functional homolog of S. cerevisiae Sec4p	GO:0006887 exocytosis | GO:0006903 vesicle targeting | GO:0006906 vesicle fusion | GO:0007264 small GTPase mediated signal transduction | GO:0007121 bipolar cellular bud site selection | GO:0006893 Golgi to plasma membrane transport | GO:0009306 protein secretion | GO:0042493 response to drug | GO:0031321 ascospore-type prospore formation | GO:0007107 membrane addition at site of cytokinesis |	GO:0003924 GTPase activity | GO:0005525 GTP binding |	GO:0030478 actin cap | GO:0005934 cellular bud tip | GO:0000131 incipient cellular bud site | GO:0001950 plasma membrane enriched fraction | GO:0031982 vesicle | GO:0005741 mitochondrial outer membrane | GO:0005886 plasma membrane |
orf19.5257	0.803302	0.112416	1.25833	0.679968	LCB4	1.56645	Putative sphingosine kinase; expression is Tac1p-regulated	GO:0019722 calcium-mediated signaling | GO:0006665 sphingolipid metabolic process |	GO:0017050 D-erythro-sphingosine kinase activity |	GO:0032541 cortical endoplasmic reticulum | GO:0005794 Golgi apparatus | GO:0005625 soluble fraction | GO:0005624 membrane fraction | GO:0005886 plasma membrane |
orf19.6916	0.910982	0.295044	1.42594	0.00796382		1.56528	Predicted ORF in Assemblies 19, 20 and 21	GO:0033615 mitochondrial proton-transporting ATP synthase complex assembly |	GO:0051082 unfolded protein binding |	GO:0005759 mitochondrial matrix | GO:0005739 mitochondrion |
orf19.5662	0.712067	0.370721	1.11424	0.0600678	PEP7	1.5648	Vesicle transport protein; acts in endosomal transport; roles in metal ion resistance, virulence, adhesion, hyphal growth, chlamydospore formation; similar to S. cerevisiae Pep7p	GO:0030447 filamentous growth | GO:0009306 protein secretion | GO:0010038 response to metal ion | GO:0045324 late endosome to vacuole transport | GO:0001410 chlamydospore formation | GO:0044406 adhesion to host | GO:0009405 pathogenesis | GO:0007034 vacuolar transport | GO:0030448 hyphal growth | GO:0006906 vesicle fusion | GO:0006896 Golgi to vacuole transport | GO:0006904 vesicle docking during…	GO:0032266 phosphatidylinositol 3-phosphate binding |	GO:0019897 extrinsic to plasma membrane | GO:0010009 external side of endosome membrane |
orf19.5551	0.913948	0.716194	1.42943	0.164955	MIF2	1.56402	Centromere-associated protein; similar to CENP-C proteins; Cse4p and Mif2p colocalize at C. albicans centromeres	GO:0007059 chromosome segregation | GO:0007067 mitosis | GO:0030472 mitotic spindle organization in nucleus |	GO:0019237 centromeric DNA binding |	GO:0000776 kinetochore | GO:0000775 chromosome, centromeric region | GO:0005634 nucleus |
orf19.6323	0.878717	0.494398	1.37358	0.179406		1.56317	Predicted ORF in Assemblies 19, 20 and 21	GO:0016573 histone acetylation | GO:0046416 D-amino acid metabolic process |	GO:0004402 histone acetyltransferase activity | GO:0047812 D-amino-acid N-acetyltransferase activity |	GO:0005634 nucleus | GO:0005737 cytoplasm |
orf19.4983	0.957094	0.7943	1.49561	0.0669384		1.56266	Predicted ORF in Assemblies 19, 20 and 21
orf19.5611	0.332028	0.51279	0.518082	0.603242		1.56036	Predicted ORF in Assemblies 19, 20 and 21	GO:0030447 filamentous growth | GO:0008204 ergosterol metabolic process |	GO:0046568 3-methylbutanal reductase activity | GO:0043892 methylglyoxal reductase (NADPH-dependent) activity |	GO:0005634 nucleus | GO:0005737 cytoplasm |
orf19.5238	0.99634	0.954379	1.55445	0.204623		1.56017	Predicted ORF in Assemblies 19, 20 and 21
orf19.4372	0.685191	0.0588233	1.0689	0.6596		1.56001	Predicted ORF in Assemblies 19, 20 and 21
orf19.2863	0.695369	0.201998	1.08429	0.550118		1.5593	Predicted ORF in Assemblies 19, 20 and 21; possibly spurious ORF (Annotation Working Group prediction)
orf19.4979	0.728332	0.509961	1.13557	0.821146	KNS1	1.55914	Protein not essential for viability; similar to S. cerevisiae Kns1p, which is a protein kinase	GO:0006468 protein amino acid phosphorylation |	GO:0004674 protein serine/threonine kinase activity | GO:0004713 protein tyrosine kinase activity |
orf19.6134	0.839064	0.653179	1.30797	0.339859		1.55884	Predicted ORF in Assemblies 19, 20 and 21
orf19.5587	0.695159	0.631978	1.08296	0.88291		1.55787	Putative protein of unknown function, transcription is upregulated in clinical isolates from HIV+ patients with oral candidiasis; predicted ORF in Assemblies 19, 20 and 21
orf19.2008	0.699709	0.117482	1.08982	0.285815		1.55753	Predicted ORF in Assemblies 19, 20 and 21	GO:0019509 methionine salvage |	GO:0046523 S-methyl-5-thioribose-1-phosphate isomerase activity |	GO:0005634 nucleus | GO:0005737 cytoplasm |
orf19.1255	0.78891	0.362693	1.22868	0.337211		1.55744	Putative transcription factor with zinc cluster DNA-binding motif; shows colony morphology-related gene regulation by Ssn6p	GO:0005975 carbohydrate metabolic process | GO:0006355 regulation of transcription, DNA-dependent |	GO:0003700 transcription factor activity |	GO:0005634 nucleus |
orf19.3168	0.742295	0.530867	1.15563	0.321438	RPN8	1.55684	Predicted ORF in Assemblies 19, 20 and 21; mutation confers hypersensitivity to amphotericin B; transcription is regulated by Mig1p; regulated by Gcn2p and Gcn4p	GO:0006511 ubiquitin-dependent protein catabolic process | GO:0042493 response to drug |	GO:0004175 endopeptidase activity |	GO:0008541 proteasome regulatory particle, lid subcomplex | GO:0034515 proteasome storage granule |
orf19.7006	1.0137	0.943025	1.57791	0.00863728		1.55659	Predicted ORF in Assemblies 19, 20 and 21
orf19.3302	1.07501	0.83723	1.6731	0.549784		1.55635	Predicted ORF in Assemblies 19, 20 and 21; transcription downregulated upon yeast-hyphal switch; transcriptionally activated by Mnl1p under weak acid stress	GO:0000122 negative regulation of transcription from RNA polymerase II promoter | GO:0005979 regulation of glycogen biosynthetic process |		GO:0005737 cytoplasm |
orf19.7156	0.684214	0.577931	1.0647	0.73635	FAA2-3	1.55609	Predicted acyl CoA synthetase	GO:0006629 lipid metabolic process | GO:0006499 N-terminal protein myristoylation |	GO:0004467 long-chain-fatty-acid-CoA ligase activity |	GO:0005777 peroxisome |
orf19.4570	0.854841	0.424539	1.3288	0.0503039		1.55444	Predicted ORF in Assemblies 19, 20 and 21
orf19.3064.1	0.913947	0.506636	1.42065	0.298698		1.55442	ORF added to Assembly 21 based on comparative genome analysis
orf19.2216	0.971769	0.843994	1.50793	0.117562	PDS5	1.55174	Predicted ORF in Assemblies 19, 20 and 21; cell-cycle regulated periodic mRNA expression	GO:0007126 meiosis | GO:0007076 mitotic chromosome condensation | GO:0007064 mitotic sister chromatid cohesion |	GO:0005198 structural molecule activity |	GO:0000794 condensed nuclear chromosome |
orf19.4144	0.935534	0.475103	1.4508	0.0316646		1.55077	Predicted ORF in Assemblies 19, 20 and 21; clade-associated gene expression			GO:0005739 mitochondrion |
orf19.5650	0.416101	0.39466	0.645192	0.546115	PRO3	1.55057	Protein induced during the mating process; alkaline upregulated	GO:0006561 proline biosynthetic process |	GO:0004735 pyrroline-5-carboxylate reductase activity |	GO:0005737 cytoplasm |
orf19.1240	1.1468	0.532389	1.77719	0.332513		1.5497	Predicted ORF in Assemblies 19, 20 and 21; fungal-specific (no human or murine homolog)
orf19.5543	0.763808	0.647428	1.18302	0.662394		1.54884	Predicted ORF in Assemblies 19, 20 and 21	GO:0042144 vacuole fusion, non-autophagic | GO:0045324 late endosome to vacuole transport | GO:0006895 Golgi to endosome transport |	GO:0005515 protein binding |	GO:0000329 fungal-type vacuole membrane | GO:0000306 extrinsic to vacuolar membrane |
orf19.1178	0.637555	0.255695	0.987235	0.93188		1.54847	Putative transcription factor with bZIP DNA-binding motif	GO:0006355 regulation of transcription, DNA-dependent |	GO:0003700 transcription factor activity |
orf19.1802	1.10813	0.734284	1.71563	0.528493		1.54822	Predicted ORF in Assemblies 19, 20 and 21; decreased expression in response to prostaglandins	GO:0000288 nuclear-transcribed mRNA catabolic process, deadenylation-dependent decay | GO:0006415 translational termination |		GO:0005634 nucleus |
orf19.3694	0.852433	0.773988	1.31869	0.673452		1.54698	Predicted ORF in Assemblies 19, 20 and 21
orf19.2039	0.957957	0.656493	1.48143	0.522372	MSF1	1.54644	Predicted ORF in Assemblies 19, 20 and 21; protein level decreased in stationary phase cultures	GO:0070156 mitochondrial phenylalanyl-tRNA aminoacylation |	GO:0004826 phenylalanine-tRNA ligase activity |	GO:0005739 mitochondrion |
orf19.1338	0.771342	0.501456	1.19259	0.740054		1.54613	Predicted ORF in Assemblies 19, 20 and 21
orf19.2415	0.928822	0.198788	1.43603	0.387809		1.54608	Predicted ORF in Assemblies 19, 20 and 21	GO:0032543 mitochondrial translation |		GO:0005739 mitochondrion |
orf19.7590	1.03708	0.931507	1.601	0.0806492		1.54376	Protein described as NADH-ubiquinone oxidoreductase; identified in detergent-resistant membrane fraction (possible lipid raft component); predicted N-terminal acetylation; repressed by nitric oxide			GO:0005624 membrane fraction |
orf19.645.1	0.675389	0.0875138	1.04259	0.511401		1.54369	ORF Predicted by Annotation Working Group	GO:0007035 vacuolar acidification |	GO:0046961 proton-transporting ATPase activity, rotational mechanism |	GO:0000329 fungal-type vacuole membrane | GO:0000221 vacuolar proton-transporting V-type ATPase, V1 domain |
orf19.2850	0.885661	0.811097	1.36648	0.707376		1.5429	Predicted ORF in Assemblies 19, 20 and 21; induced by nitric oxide in yhb1 mutant
orf19.730	0.843703	0.194832	1.30053	0.366885		1.54146	Predicted ORF in Assembly 20 and 21 (see Locus History); transcriptionally activated by Mnl1p under weak acid stress	GO:0007264 small GTPase mediated signal transduction |	GO:0005100 Rho GTPase activator activity |	GO:0005737 cytoplasm | GO:0005935 cellular bud neck |
orf19.2277	0.94639	0.88656	1.45872	0.0300729	TPK2	1.54135	Catalytic subunit of cAMP-dependent protein kinase (PKA), isoform of Tpk1p; required for wild-type epithelial cell damage and engulfment and oral (not systemic) virulence in mouse; involved in control of morphogenesis and stress response	GO:0006468 protein amino acid phosphorylation | GO:0006950 response to stress | GO:0000902 cell morphogenesis | GO:0030448 hyphal growth | GO:0007124 pseudohyphal growth | GO:0009405 pathogenesis | GO:0044409 entry into host | GO:0007265 Ras protein signal transduction | GO:0001403 invasive growth in response to glucose limitation |	GO:0004691 cAMP-dependent protein kinase activity |	GO:0005737 cytoplasm | GO:0005634 nucleus | GO:0005952 cAMP-dependent protein kinase complex |
orf19.7665	1.16246	0.553518	1.79122	0.000736103		1.54088	Predicted ORF in Assemblies 19, 20 and 21	GO:0006461 protein complex assembly | GO:0009060 aerobic respiration |		GO:0005743 mitochondrial inner membrane |
orf19.3435	1.03513	0.0612781	1.59439	0.121863		1.54028	Predicted ORF in Assemblies 19, 20 and 21
orf19.999	1.30327	0.00545365	2.00235	0.0724775	GCA2	1.5364	Predicted extracellular glucoamylase, promotes biofilm matrix formation	GO:0009272 fungal-type cell wall biogenesis | GO:0042710 biofilm formation |	GO:0004558 alpha-glucosidase activity |	GO:0005783 endoplasmic reticulum |
orf19.5700	0.833421	0.537117	1.27983	0.484125	TLO11	1.53563	Member of a family of telomere-proximal genes of unknown function; may be spliced in vivo
orf19.7306	0.687026	0.354052	1.05487	0.77386		1.53542	Protein of aldo-keto reductase family; increased transcription associated with MDR1 overexpression, benomyl or long-term fluconazole treatment; overexpression does not affect drug or oxidative stress sensitivity			GO:0005634 nucleus | GO:0005737 cytoplasm |
orf19.3047	0.798928	0.754031	1.2263	0.421986		1.53493	Predicted ORF in Assemblies 19, 20 and 21	GO:0006367 transcription initiation from RNA polymerase II promoter | GO:0045944 positive regulation of transcription from RNA polymerase II promoter |	GO:0003712 transcription cofactor activity |	GO:0005634 nucleus |
orf19.524	0.842601	0.49882	1.29326	0.0228023		1.53484	Predicted ORF in Assemblies 19, 20 and 21
orf19.1552	0.795656	0.257732	1.22091	0.234895	CPR3	1.53447	Protein described as a peptidyl-prolyl cis-trans isomerase; macrophage-induced protein; protein level decreased in stationary phase cultures	GO:0006457 protein folding |	GO:0003755 peptidyl-prolyl cis-trans isomerase activity |	GO:0005739 mitochondrion |
orf19.896	0.84777	0.512366	1.30034	0.491951	CHK1	1.53383	Histidine kinase involved in a two-component signaling pathway that regulates cell wall biosynthesis; disruption impairs hyphal development and decreases virulence in mouse intravenous (but not rat vaginal) infection	GO:0000160 two-component signal transduction system (phosphorelay) | GO:0051042 negative regulation of calcium-independent cell-cell adhesion | GO:0009405 pathogenesis | GO:0044011 single-species biofilm formation on inanimate substrate | GO:0030448 hyphal growth | GO:0006468 protein amino acid phosphorylation | GO:0007234 osmosensory signaling pathway via two-component system | GO:0009272 fungal…	GO:0000155 two-component sensor activity | GO:0005034 osmosensor activity |	GO:0005737 cytoplasm | GO:0005886 plasma membrane |
orf19.6324	0.78606	0.0498591	1.20561	0.256041	VID27	1.53374	Protein similar to S. cerevisiae Vid27p; transposon mutation affects filamentous growth; mutation confers hypersensitivity to toxic ergosterol analog; fungal-specific (no human or murine homolog)	GO:0030447 filamentous growth | GO:0042493 response to drug |		GO:0005737 cytoplasm |
orf19.6457	0.945463	0.589232	1.4495	0.340677		1.53311	Predicted ORF in Assemblies 19, 20 and 21
orf19.2458	0.598793	0.534764	0.917806	0.794333		1.53276	Putative transcription factor with zinc finger DNA-binding motif	GO:0006355 regulation of transcription, DNA-dependent | GO:0042149 cellular response to glucose starvation |	GO:0003700 transcription factor activity |	GO:0005737 cytoplasm |
orf19.593	0.762136	0.259021	1.16777	0.270243	FGR32	1.53223	Protein described as similar to S. cerevisiae Swa2p; induced upon adherence to polystyrene; transposon mutation affects filamentous growth	GO:0030447 filamentous growth |
orf19.3950	1.01437	0.830592	1.55326	0.316048	MSM1	1.53127	Mitochondrial methionyl-tRNA synthetase (MetRS); functionally complements methionine auxotrophy of an E. coli MetRS mutant; transcription is regulated by Nrg1p	GO:0006431 methionyl-tRNA aminoacylation |	GO:0004825 methionine-tRNA ligase activity |	GO:0005739 mitochondrion |
orf19.2518	0.723767	0.351631	1.10813	0.832515		1.53106	Predicted ORF in Assemblies 19, 20 and 21	GO:0006888 ER to Golgi vesicle-mediated transport | GO:0034727 piecemeal microautophagy of nucleus | GO:0042144 vacuole fusion, non-autophagic |	GO:0005483 soluble NSF attachment protein activity |	GO:0000300 peripheral to membrane of membrane fraction |
orf19.709	0.669428	0.418591	1.02489	0.518509	PUP2	1.53099	Alpha5 subunit of the 20S proteasome; macrophage/pseudohyphal-repressed; regulated by Gcn2p and Gcn4p; protein detected by mass spec in exponential and stationary phase cultures	GO:0006511 ubiquitin-dependent protein catabolic process | GO:0006950 response to stress |	GO:0004175 endopeptidase activity |	GO:0019773 proteasome core complex, alpha-subunit complex | GO:0005839 proteasome core complex | GO:0034515 proteasome storage granule |
orf19.778	0.778239	0.741201	1.1913	0.637922	PIL1	1.53077	Echinocandin-binding protein; localizes to cell surface of hyphae, but not yeast-form cells; biofilm induced; fungal-specific (no human or murine homolog)
orf19.5826	1.02626	0.619321	1.57061	0.0108813		1.53042	Predicted ORF in Assemblies 19, 20 and 21	GO:0006810 transport |	GO:0015185 L-gamma-aminobutyric acid transmembrane transporter activity |	GO:0016020 membrane |
orf19.3456	0.557526	0.377577	0.852792	0.822223		1.5296	Predicted ORF in Assemblies 19, 20 and 21	GO:0006468 protein amino acid phosphorylation |	GO:0004674 protein serine/threonine kinase activity |
orf19.4403	0.800313	0.580281	1.22366	0.0120264	VPS11	1.52897	Protein involved in protein trafficking; putative role in vesicle-target membrane fusion; mutant lacks vacuole; role in hyphal growth, possibly via vacuole expansion into hypha; role in killing of and survival within macrophage	GO:0007034 vacuolar transport | GO:0007033 vacuole organization | GO:0009306 protein secretion | GO:0030448 hyphal growth | GO:0020012 evasion or tolerance of host immune response | GO:0001410 chlamydospore formation | GO:0009405 pathogenesis | GO:0030447 filamentous growth | GO:0044114 development of symbiont in host | GO:0045324 late endosome to vacuole transport | GO:0006904 vesicle docking du…	GO:0035091 phosphoinositide binding |	GO:0005737 cytoplasm | GO:0033263 CORVET complex | GO:0030897 HOPS complex | GO:0000329 fungal-type vacuole membrane |
orf19.4754	0.735568	0.577698	1.12437	0.438523	ZWF1	1.52857	Putative glucose-6-phosphate dehydrogenase; antigenic in murine infection; activity induced by O2 or oxidizing agents H2O2 or menadione; caspofungin repressed; macrophage induced; induced in core stress response; regulated by Gcn2p, Gcn4p	GO:0009051 pentose-phosphate shunt, oxidative branch | GO:0042542 response to hydrogen peroxide |	GO:0004345 glucose-6-phosphate dehydrogenase activity |	GO:0005625 soluble fraction | GO:0005737 cytoplasm |
orf19.6534.2	0.813219	0.4013	1.24222	0.531141		1.52753	Predicted ORF in Assemblies 19, 20 and 21	GO:0051666 actin cortical patch localization | GO:0034316 negative regulation of Arp2/3 complex-mediated actin nucleation | GO:0007017 microtubule-based process | GO:0007015 actin filament organization |	GO:0008017 microtubule binding | GO:0051015 actin filament binding | GO:0030674 protein binding, bridging |	GO:0005885 Arp2/3 protein complex | GO:0030479 actin cortical patch |
orf19.2249	0.808591	0.525452	1.23494	0.299227		1.52728	Predicted ORF in Assemblies 19, 20 and 21; decreased expression observed in an ssr1 homozygous null mutant	GO:0006461 protein complex assembly | GO:0016485 protein processing |		GO:0005743 mitochondrial inner membrane | GO:0005758 mitochondrial intermembrane space |
orf19.7417	0.646786	0.641062	0.98779	0.769041	TSA1	1.52723	Protein of TSA/alkyl hydroperoxide peroxidase C (AhPC) family; similar to thiol-dependent peroxidases of oxidative stress signaling; antigenic; hyphal surface, nucleus; yeast-form nucleus, cytoplasm; biofilm, phagocytosis, peroxide induced	GO:0051701 interaction with host | GO:0006979 response to oxidative stress | GO:0031505 fungal-type cell wall organization | GO:0030448 hyphal growth | GO:0006950 response to stress | GO:0042744 hydrogen peroxide catabolic process | GO:0042542 response to hydrogen peroxide |	GO:0005515 protein binding | GO:0008379 thioredoxin peroxidase activity |	GO:0009277 fungal-type cell wall | GO:0005634 nucleus | GO:0030446 hyphal cell wall | GO:0009986 cell surface | GO:0005737 cytoplasm |
orf19.6729	0.787673	0.539007	1.2027	0.725308	TIP120	1.52691	Protein similar to human and rat TBP-binding transcription regulatory protein; not essential for viability	GO:0006350 transcription |		GO:0005634 nucleus |
orf19.5833	0.781547	0.335357	1.19308	0.0844327		1.52656	Predicted ORF in Assemblies 19, 20 and 21	GO:0015031 protein transport |		GO:0034098 Cdc48p-Npl4p-Ufd1p AAA ATPase complex |
orf19.4166	1.09032	0.250005	1.66374	0.504008		1.52592	Predicted zinc-finger protein of unknown function
orf19.757	0.630479	0.540171	0.961474	0.947796		1.52499	Predicted ORF in Assemblies 19, 20 and 21
orf19.6838	0.826026	0.0907213	1.25857	0.380907		1.52364	Putative protein of unknown function, transcription is upregulated in clinical isolates from HIV+ patients with oral candidiasis; predicted ORF in Assemblies 19, 20 and 21	GO:0009062 fatty acid catabolic process |	GO:0008670 2,4-dienoyl-CoA reductase (NADPH) activity |	GO:0005782 peroxisomal matrix |
orf19.4607	0.963865	0.888653	1.46753	0.0170976		1.52255	Predicted ORF in Assemblies 19, 20 and 21; hyphal induced
orf19.5692	0.978861	0.749373	1.48944	0.0827069		1.5216	Predicted ORF in Assemblies 19, 20 and 21
orf19.4735	0.284293	0.477086	0.432296	0.648818		1.5206	Predicted ORF in Assemblies 19, 20 and 21
orf19.6811	0.843531	0.515588	1.28138	0.542103		1.51907	Predicted ORF in Assemblies 19, 20 and 21	GO:0009102 biotin biosynthetic process | GO:0042493 response to drug | GO:0006826 iron ion transport |		GO:0005758 mitochondrial intermembrane space |
orf19.4664	0.877968	0.119132	1.33309	0.688872		1.51838	Predicted ORF in Assemblies 19, 20 and 21	GO:0016573 histone acetylation | GO:0048869 cellular developmental process |	GO:0043166 H4/H2 histone acetyltransferase activity |	GO:0005634 nucleus | GO:0005737 cytoplasm |
orf19.1861	0.979789	0.919063	1.48756	0.0995814		1.51825	Predicted ORF in Assemblies 19, 20 and 21
orf19.5159	0.884681	0.281017	1.34233	0.445885		1.51731	Predicted ORF in Assemblies 19, 20 and 21; similarity to S. cerevisiae Ynl191p; similar to amidophosphoribosyl transferases	GO:0006751 glutathione catabolic process |	GO:0004044 amidophosphoribosyltransferase activity | GO:0008242 omega peptidase activity |	GO:0005737 cytoplasm |
orf19.7403	0.992833	0.979642	1.50633	0.627164		1.5172	Predicted ORF in Assemblies 19, 20 and 21
orf19.3999	0.331975	0.470345	0.503193	0.359879		1.51576	Predicted ORF in Assemblies 19, 20 and 21
orf19.117	0.899262	0.859696	1.36272	0.612201		1.51538	Predicted ORF in Assemblies 19, 20 and 21	GO:0006906 vesicle fusion | GO:0006893 Golgi to plasma membrane transport |	GO:0005484 SNAP receptor activity |	GO:0019897 extrinsic to plasma membrane | GO:0031201 SNARE complex |
orf19.7586	2.58568	0.316827	3.91827	0.442094	CHT3	1.51537	Chitinase, major; functional homolog of S. cerevisiae Cts1p; 4 N-glycosylation motifs; possible O-mannosylated region; putative signal peptide; hyphal-repressed; farnesol upregulated in biofilm; regulated by Efg1p, Cyr1p, Ras1p	GO:0000282 cellular bud site selection | GO:0007109 cytokinesis, completion of separation |	GO:0004568 chitinase activity | GO:0008843 endochitinase activity |	GO:0009986 cell surface | GO:0009277 fungal-type cell wall | GO:0005576 extracellular region | GO:0005635 nuclear envelope | GO:0005783 endoplasmic reticulum |
orf19.5823	0.653929	0.335309	0.990901	0.91063	SGT2	1.5153	Protein abundance is affected by URA3 expression in the CAI-4 strain background; transcription is regulated by Mig1p	GO:0009408 response to heat |		GO:0005737 cytoplasm |
orf19.5873	0.790728	0.239735	1.19808	0.633258	POL1	1.51516	Protein described as DNA directed DNA polymerase alpha; RNA abundance regulated by cell cycle, tyrosol and cell density	GO:0006273 lagging strand elongation | GO:0006270 DNA replication initiation | GO:0006279 premeiotic DNA synthesis | GO:0006278 RNA-dependent DNA replication | GO:0000731 DNA synthesis during DNA repair |	GO:0003887 DNA-directed DNA polymerase activity |	GO:0005739 mitochondrion | GO:0005658 alpha DNA polymerase |
orf19.1365	0.678129	0.060573	1.02716	0.817506		1.5147	Predicted ORF in Assemblies 19, 20 and 21; mutation confers hypersensitivity to toxic ergosterol analog; constitutive expression independent of MTL or white-opaque status	GO:0042493 response to drug |
orf19.3433	0.995142	0.912808	1.50654	0.688042	OYE23	1.51389	Putative NAPDH dehydrogenase; induced by nitric oxide, benomyl; oxidative stress-induced via Cap1p; fungal-specific (no human or murine homolog)		GO:0003959 NADPH dehydrogenase activity |
orf19.2280	0.909716	0.399218	1.37691	0.42288		1.51356	Putative transcription factor with zinc cluster DNA-binding motif	GO:0006355 regulation of transcription, DNA-dependent |	GO:0003700 transcription factor activity |
orf19.3169	0.955408	0.674786	1.44542	0.439364		1.51289	Predicted ORF in Assemblies 19, 20 and 21	GO:0034087 establishment of mitotic sister chromatid cohesion |		GO:0005737 cytoplasm |
orf19.3084	0.97158	0.779881	1.46934	0.276347		1.51232	Predicted ORF in Assemblies 19, 20 and 21	GO:0006348 chromatin silencing at telomere |	GO:0016407 acetyltransferase activity |	GO:0000781 chromosome, telomeric region | GO:0000785 chromatin |
orf19.3239	0.89677	0.258024	1.35607	0.190518	CTF18	1.51217	Predicted ORF in Assemblies 19, 20 and 21; cell-cycle regulated periodic mRNA expression	GO:0000724 double-strand break repair via homologous recombination | GO:0007064 mitotic sister chromatid cohesion |		GO:0005663 DNA replication factor C complex | GO:0005739 mitochondrion | GO:0043596 nuclear replication fork | GO:0031390 Ctf18 RFC-like complex |
orf19.5491.1	0.819845	0.0922468	1.23911	0.188203	ATP14	1.5114	ORF Predicted by Annotation Working Group; macrophage/pseudohyphal-induced	GO:0015986 ATP synthesis coupled proton transport |	GO:0046961 proton-transporting ATPase activity, rotational mechanism | GO:0046933 hydrogen ion transporting ATP synthase activity, rotational mechanism | GO:0016887 ATPase activity |	GO:0000276 mitochondrial proton-transporting ATP synthase complex, coupling factor F(o) |
orf19.899	0.671939	0.0757109	1.01528	0.961849		1.51097	Predicted ORF in Assemblies 19, 20 and 21
orf19.3612	0.948978	0.832375	1.43368	0.409821	PST2	1.51076	Putative NADH:quinone oxidoreductase; similar to 1,4-benzoquinone reductase; immunogenic in mice; benomyl treatment induces transcription; oxidative stress-induced via Cap1p; fungal-specific (no human/murine homolog), farnesol-downregulated		GO:0050625 2-hydroxy-1,4-benzoquinone reductase activity |	GO:0030446 hyphal cell wall |
orf19.5633	1.34417	0.624696	2.03024	0.616353		1.51041	Predicted ORF in Assemblies 19, 20 and 21
orf19.6854	0.912265	0.258999	1.37784	0.046707	ATP1	1.51035	Protein similar to alpha subunit of ATP synthase; antigenic in human, mouse; at surface of hyphae, not yeast-form; soluble protein in hyphae; induced by ciclopirox olamine, ketoconazole, or flucytosine; downregulated by Efg1p, caspofungin	GO:0006754 ATP biosynthetic process | GO:0015986 ATP synthesis coupled proton transport |	GO:0046961 proton-transporting ATPase activity, rotational mechanism | GO:0046933 hydrogen ion transporting ATP synthase activity, rotational mechanism | GO:0016887 ATPase activity |	GO:0030446 hyphal cell wall | GO:0009986 cell surface | GO:0005625 soluble fraction | GO:0005754 mitochondrial proton-transporting ATP synthase, catalytic core | GO:0042645 mitochondrial nucleoid | GO:0005886 plasma membrane |
orf19.2978	1.13401	0.554176	1.71244	0.0034732		1.51007	Predicted ORF in Assemblies 19, 20 and 21; possibly spurious ORF (Annotation Working Group prediction)
orf19.5816	0.714463	0.486283	1.07827	0.26594	EBP7	1.50921	Predicted ORF in Assemblies 19, 20 and 21; mutation confers hypersensitivity to toxic ergosterol analog; oxidative stress-induced via Cap1p	GO:0042493 response to drug |	GO:0003959 NADPH dehydrogenase activity |
orf19.2089	0.78296	0.68077	1.18141	0.0890219		1.50891	Predicted ORF in Assemblies 19, 20 and 21	GO:0006906 vesicle fusion |		GO:0005774 vacuolar membrane |
orf19.5776	0.714845	0.146352	1.07815	0.613934	TOM1	1.50823	Predicted ORF in Assemblies 19, 20 and 21; transcription is regulated by Nrg1p and Mig1p	GO:0000209 protein polyubiquitination | GO:0006513 protein monoubiquitination | GO:0006913 nucleocytoplasmic transport | GO:0007067 mitosis | GO:0008361 regulation of cell size | GO:0006997 nucleus organization |	GO:0004842 ubiquitin-protein ligase activity |	GO:0005730 nucleolus |
orf19.5762	1.00654	0.971006	1.51743	0.00789491	PGA61	1.50757	Putative GPI-anchored protein of unknown function; possibly spurious ORF (Annotation Working Group prediction)			GO:0009986 cell surface |
orf19.5260	0.811573	0.704873	1.22252	0.125874	RPN2	1.50636	Transcription is regulated by Mig1p; caspofungin repressed; regulated by Gcn2p and Gcn4p; gene used for strain identification by multilocus sequence typing	GO:0043248 proteasome assembly | GO:0006511 ubiquitin-dependent protein catabolic process |	GO:0004175 endopeptidase activity | GO:0030674 protein binding, bridging |	GO:0005634 nucleus | GO:0008540 proteasome regulatory particle, base subcomplex | GO:0034515 proteasome storage granule |
orf19.6440	0.956781	0.663562	1.44063	0.412267		1.5057	Predicted ORF in Assemblies 19, 20 and 21	GO:0006511 ubiquitin-dependent protein catabolic process |	GO:0004842 ubiquitin-protein ligase activity |	GO:0005637 nuclear inner membrane | GO:0005789 endoplasmic reticulum membrane |
orf19.3150	0.812147	0.681521	1.22254	0.222796	GRE2	1.50532	Protein described as a reductase; transcription is regulated by Nrg1p and Tup1p; benomyl-induced; hyphal-induced; macrophage/pseudohyphal-repressed; expression greater in low iron; reported to be involved in osmotic stress response	GO:0006970 response to osmotic stress |	GO:0016491 oxidoreductase activity |
orf19.1321	0.792003	0.80722	1.19215	0.89825	HWP1	1.50523	Hyphal cell wall protein; covalently crosslinked to epithelial cells by host transglutaminase; opaque- and a-specific, alpha-factor induced; at MTLa side of conjugation tube; assessment of virulence role complicated by URA3 effects	GO:0009405 pathogenesis | GO:0030448 hyphal growth | GO:0044406 adhesion to host | GO:0007124 pseudohyphal growth | GO:0001403 invasive growth in response to glucose limitation | GO:0030447 filamentous growth | GO:0044011 single-species biofilm formation on inanimate substrate | GO:0031505 fungal-type cell wall organization |		GO:0009986 cell surface | GO:0009277 fungal-type cell wall | GO:0005937 mating projection | GO:0030446 hyphal cell wall | GO:0005886 plasma membrane |
orf19.2066.1	0.912768	0.636684	1.37331	0.265047		1.50455	Predicted ORF in Assembly 20 and 21; gene has intron	GO:0015986 ATP synthesis coupled proton transport |	GO:0046933 hydrogen ion transporting ATP synthase activity, rotational mechanism |	GO:0000276 mitochondrial proton-transporting ATP synthase complex, coupling factor F(o) | GO:0005886 plasma membrane |
orf19.4674.1	1.34407	0.411706	2.02145	0.0146188	CRD2	1.50397	Metallothionein; role in adaptation to growth with high concentration of copper ions; basal transcription is cadmium-repressed; regulated by Ssn6p; complements copper sensitivity of an S. cerevisiae cup1 null mutant	GO:0006878 cellular copper ion homeostasis |	GO:0005507 copper ion binding |
orf19.1946	0.724533	0.511039	1.08919	0.19104		1.50331	Similar to an aldose 1-epimerase-related protein; antigenic during murine systemic infection; protein detected by mass spec in exponential and stationary phase cultures		GO:0047938 glucose-6-phosphate 1-epimerase activity |	GO:0005634 nucleus | GO:0005737 cytoplasm |
orf19.847	0.327709	0.00665121	0.491934	0.420985	YIM1	1.50113	Protein similar to protease of mitochondrial inner membrane; increased transcription is observed upon benomyl treatment; macrophage-downregulated gene	GO:0006627 mitochondrial protein processing during import | GO:0006974 response to DNA damage stimulus |	GO:0004175 endopeptidase activity |	GO:0005743 mitochondrial inner membrane | GO:0005811 lipid particle |
orf19.7261	0.6552	0.372422	0.983207	0.960459		1.50062	Predicted ORF in Assemblies 19, 20 and 21	GO:0016192 vesicle-mediated transport |	GO:0005093 Rab GDP-dissociation inhibitor activity |	GO:0005625 soluble fraction | GO:0005624 membrane fraction |
orf19.2023	0.731971	0.604986	1.09831	0.628681	HGT7	1.50048	Putative glucose transporter, major facilitator superfamily; glucose-, fluconazole-, Snf3p-induced, expressed at high glucose; upregulated in biofilm; C. albicans glucose transporter family comprises 20 members; 12 TM regions predicted	GO:0015758 glucose transport | GO:0042493 response to drug | GO:0008643 carbohydrate transport |	GO:0005355 glucose transmembrane transporter activity | GO:0015578 mannose transmembrane transporter activity | GO:0005353 fructose transmembrane transporter activity | GO:0051119 sugar transmembrane transporter activity |	GO:0005887 integral to plasma membrane | GO:0016020 membrane | GO:0005886 plasma membrane |
orf19.4456	1.17561	0.754868	1.76397	0.0575807	GAP4	1.50047	Putative amino acid permease; hyphal induced; regulated by Gcn2p and Gcn4p; shows colony morphology-related gene regulation by Ssn6p; detected at plasma membrane of yeast-form and germ tube by mass spectrometry	GO:0006865 amino acid transport |		GO:0005887 integral to plasma membrane | GO:0005886 plasma membrane |
orf19.4247	0.82692	0.856079	1.24057	0.726791		1.50024	Predicted ORF in Assemblies 19, 20 and 21
orf19.4346	0.731327	0.593625	1.09702	0.840241		1.50003	Predicted ORF in Assemblies 19, 20 and 21	GO:0006914 autophagy | GO:0006901 vesicle coating |	GO:0005198 structural molecule activity |	GO:0030127 COPII vesicle coat | GO:0005789 endoplasmic reticulum membrane |
orf19.6136	1.06184	0.82988	1.59265	0.330114		1.4999	Predicted ORF in Assemblies 19, 20 and 21; repressed by nitric oxide	GO:0006412 translation |	GO:0003735 structural constituent of ribosome |	GO:0005762 mitochondrial large ribosomal subunit | GO:0005739 mitochondrion |
orf19.6990	0.970741	0.750075	1.45525	0.0806879		1.49912	Predicted ORF in Assemblies 19, 20 and 21	GO:0006950 response to stress |	GO:0003755 peptidyl-prolyl cis-trans isomerase activity |	GO:0005783 endoplasmic reticulum |
orf19.4984	0.96783	0.765905	1.4492	0.181506		1.49737	Predicted ORF in Assemblies 19, 20 and 21
orf19.2474	0.986814	0.981098	1.47704	0.396518	PRC3	1.49678	Transcription is regulated by Nrg1p and Mig1p; regulated by Gcn2p and Gcn4p
orf19.2641	0.930789	0.596978	1.39242	0.236549	ARP1	1.49596	Protein described as centractin; induced upon adherence to polystyrene	GO:0000092 mitotic anaphase B |	GO:0005200 structural constituent of cytoskeleton |	GO:0005869 dynactin complex |
orf19.4597	0.790931	0.623795	1.18168	0.746106		1.49403	Predicted ORF in Assemblies 19, 20 and 21	GO:0006970 response to osmotic stress | GO:0006897 endocytosis | GO:0007047 cell wall organization | GO:0007015 actin filament organization | GO:0051016 barbed-end actin filament capping | GO:0030447 filamentous growth |	GO:0051015 actin filament binding |	GO:0043332 mating projection tip | GO:0008290 F-actin capping protein complex | GO:0005884 actin filament | GO:0030479 actin cortical patch |
orf19.1121	0.855798	0.27883	1.27856	0.443693		1.49399	Predicted ORF in Assemblies 19, 20 and 21
orf19.7592	0.707593	0.457112	1.05712	0.865459	FAA4	1.49397	Predicted acyl CoA synthase	GO:0006629 lipid metabolic process | GO:0006499 N-terminal protein myristoylation | GO:0006869 lipid transport |	GO:0004467 long-chain-fatty-acid-CoA ligase activity |	GO:0005811 lipid particle |
orf19.7179	0.935055	0.791687	1.39602	0.168738		1.49299	Predicted ORF in Assemblies 19, 20 and 21	GO:0006626 protein targeting to mitochondrion | GO:0042026 protein refolding |		GO:0005743 mitochondrial inner membrane |
orf19.4369	0.883469	0.630147	1.31853	0.64615		1.49245	Protein not essential for viability	GO:0000122 negative regulation of transcription from RNA polymerase II promoter |
orf19.4862.2	0.963573	0.90536	1.43795	0.548299		1.49231	ORF Predicted by Annotation Working Group	GO:0009060 aerobic respiration | GO:0033617 mitochondrial respiratory chain complex IV assembly |	GO:0051082 unfolded protein binding |	GO:0031305 integral to mitochondrial inner membrane | GO:0005886 plasma membrane |
orf19.7012	1.05947	0.542871	1.57981	0.23896		1.49114	Predicted ORF in Assemblies 19, 20 and 21		GO:0003735 structural constituent of ribosome |	GO:0005763 mitochondrial small ribosomal subunit |
orf19.1193	0.804622	0.22291	1.19952	0.359575	GNP1	1.49078	Protein described as similar to asparagine and glutamine permease; fluconazole or caspofungin induced; transcription is regulated by Nrg1p, Mig1p, Tup1p, Gcn2p, Gcn4p, and alkaline regulated by Rim101p; fungal-specific	GO:0006865 amino acid transport | GO:0055085 transmembrane transport |	GO:0015193 L-proline transmembrane transporter activity |	GO:0005886 plasma membrane |
orf19.7612	0.97392	0.834982	1.45145	0.287314	CTM1	1.49032	Predicted ORF in Assemblies 19, 20 and 21; regulated by Gcn2p and Gcn4p; transcriptionally activated by Mnl1p under weak acid stress	GO:0006464 protein modification process |	GO:0000277 [cytochrome c]-lysine N-methyltransferase activity |	GO:0005829 cytosol |
orf19.2242	0.95185	0.913977	1.41747	0.590688	PRB1	1.48917	Putative endoprotease B; regulated by heat, carbon source (GlcNAc-induced), nitrogen, macrophage response, human neutrophils; putative D200-H232-S389 catalytic triad; similar to (but does not replace) S. cerevisiae vacuolar B protease Prb1p	GO:0007039 vacuolar protein catabolic process | GO:0006508 proteolysis | GO:0042594 response to starvation |	GO:0004252 serine-type endopeptidase activity |	GO:0000324 fungal-type vacuole |
orf19.3573	0.702782	0.275551	1.0461	0.887659		1.48851	Predicted ORF in Assemblies 19, 20 and 21	GO:0001302 replicative cell aging | GO:0016562 protein import into peroxisome matrix, receptor recycling |	GO:0046982 protein heterodimerization activity | GO:0016887 ATPase activity |	GO:0005829 cytosol | GO:0005625 soluble fraction | GO:0005777 peroxisome | GO:0005624 membrane fraction |
orf19.5552	0.84715	0.600417	1.26064	0.116878		1.48809	Predicted ORF in Assemblies 19, 20 and 21	GO:0006358 regulation of transcription from RNA polymerase II promoter, global |
orf19.1267	0.569431	0.0240643	0.84722	0.161793		1.48783	Predicted ORF in Assemblies 19, 20 and 21
orf19.558	0.682718	0.206713	1.0156	0.98203	GUT1	1.48758	Protein described as glycerol kinase; downregulated upon adherence to polystyrene; greater mRNA abundance observed in a cyr1 homozygous null mutant than in wild type	GO:0006071 glycerol metabolic process |	GO:0004370 glycerol kinase activity |	GO:0005737 cytoplasm |
orf19.980	0.758767	0.213149	1.12851	0.629486		1.48729	Predicted ORF in Assemblies 19, 20 and 21	GO:0030036 actin cytoskeleton organization | GO:0032958 inositol phosphate biosynthetic process |	GO:0070190 inositol hexakisphosphate 1-kinase or 3-kinase activity | GO:0033187 inositol hexakisphosphate 4-kinase or 6-kinase activity | GO:0000829 inositol heptakisphosphate kinase activity |	GO:0005737 cytoplasm |
orf19.7574	0.664614	0.435766	0.986328	0.626425		1.48406	Predicted ORF in Assemblies 19, 20 and 21	GO:0000054 ribosome export from nucleus | GO:0006407 rRNA export from nucleus |	GO:0004871 signal transducer activity |	GO:0005634 nucleus |
orf19.6376	0.962835	0.903642	1.42867	0.465644	PTC5	1.48381	Putative protein phosphatase of the Type 2C-related family (serine/threonine-specific), similar to S. cerevisiae Ptc5p; mutant shows virulence defect	GO:0043085 positive regulation of catalytic activity | GO:0006470 protein amino acid dephosphorylation |	GO:0004722 protein serine/threonine phosphatase activity |	GO:0005739 mitochondrion |
orf19.6257	0.941592	0.832336	1.39667	0.60455	GLT1	1.48331	Putative glutamate synthase; alkaline downregulated; transcription is downregulated in both intermediate and mature biofilms	GO:0006537 glutamate biosynthetic process |	GO:0016040 glutamate synthase (NADH) activity |	GO:0005739 mitochondrion |
orf19.3149	0.717897	0.404871	1.06481	0.864735	LSP1	1.48323	Predicted ORF in Assemblies 19, 20 and 21; caspofungin repressed; biofilm induced; fungal-specific (no human or murine homolog); protein detected by mass spec in exponential and stationary phase cultures	GO:0006897 endocytosis | GO:0009408 response to heat | GO:0008104 protein localization |	GO:0004860 protein kinase inhibitor activity |	GO:0032126 eisosome | GO:0001950 plasma membrane enriched fraction | GO:0005741 mitochondrial outer membrane |
orf19.2157	0.722636	0.519617	1.07152	0.142506	DAC1	1.48279	N-acetylglucosamine-6-phosphate (GlcNAcP) deacetylase; enzyme of N-acetylglucosamine utilization; required for wild-type hyphal growth and virulence in mouse systemic infection; gene is GlcNAc-induced	GO:0006046 N-acetylglucosamine catabolic process | GO:0030448 hyphal growth | GO:0006043 glucosamine catabolic process | GO:0009405 pathogenesis |	GO:0008448 N-acetylglucosamine-6-phosphate deacetylase activity |
orf19.132	0.934656	0.189098	1.38563	0.122888		1.48251	Putative ortholog of S. cerevisiae SIF2; has a LisH motif; predicted ORF in Assemblies 19, 20 and 21	GO:0016575 histone deacetylation | GO:0045835 negative regulation of meiosis | GO:0032874 positive regulation of stress-activated MAPK cascade | GO:0006348 chromatin silencing at telomere |	GO:0017136 NAD-dependent histone deacetylase activity |	GO:0034967 Set3 complex | GO:0070210 Rpd3L-Expanded complex |
orf19.6782	1.46927	0.418039	2.17723	0.609455	BMT1	1.48184	Putative beta-mannosyltransferase, required for addition of the first beta-mannose residue to the acid-stable fraction of cell wall phosphopeptidomannan; member of a 9-gene family; predicted ORF in Assemblies 19, 20 and 21	GO:0070135 beta-1,2-oligomannoside metabolic process |
orf19.3822	1.2869	0.671794	1.90689	0.744092	SCS7	1.48176	Protein described as ceramide hydroxylase; transcription is regulated by Nrg1p; transcriptionally regulated by iron; expression greater in high iron; fluconazole-induced	GO:0000038 very-long-chain fatty acid metabolic process | GO:0006665 sphingolipid metabolic process |	GO:0000170 sphingosine hydroxylase activity |	GO:0005624 membrane fraction | GO:0005783 endoplasmic reticulum |
orf19.3422	0.879238	0.638882	1.30102	0.321146	FMP27	1.47972	Predicted ORF in Assemblies 19, 20 and 21; fungal-specific (no human or murine homolog)			GO:0005739 mitochondrion |
orf19.4197	0.786753	0.486507	1.16369	0.683788	YHM2	1.4791	Alkaline upregulated	GO:0006842 tricarboxylic acid transport | GO:0000002 mitochondrial genome maintenance |	GO:0005371 tricarboxylate secondary active transmembrane transporter activity | GO:0003677 DNA binding |	GO:0005743 mitochondrial inner membrane | GO:0042645 mitochondrial nucleoid | GO:0005886 plasma membrane |
orf19.4395	0.766582	0.117909	1.1336	0.0390204		1.47878	Predicted ORF in Assemblies 19, 20 and 21; protein detected by mass spec in exponential and stationary phase cultures	GO:0006970 response to osmotic stress | GO:0051014 actin filament severing | GO:0030042 actin filament depolymerization |	GO:0003779 actin binding |	GO:0030479 actin cortical patch | GO:0043332 mating projection tip | GO:0005634 nucleus | GO:0005737 cytoplasm |
orf19.6092	0.737022	0.205097	1.08956	0.605016	KEL1	1.47833	Protein containing a Kelch repeat domain, similar to S. cerevisiae Kel1p; not required for adherence to buccal epithelial cells or virulence in mouse systemic infection; null mutant colonies exhibit slightly decreased filamentation ratio	GO:0030448 hyphal growth | GO:0001100 negative regulation of exit from mitosis | GO:0008360 regulation of cell shape | GO:0000755 cytogamy |		GO:0043332 mating projection tip | GO:0005934 cellular bud tip | GO:0005737 cytoplasm | GO:0005935 cellular bud neck |
orf19.5718	0.735911	0.62119	1.08787	0.75195		1.47827	Predicted ORF in Assemblies 19, 20 and 21; merged with orf19.1019 in Assembly 21
orf19.3720	0.910447	0.451238	1.34583	0.396907		1.47821	Predicted ORF in Assemblies 19, 20 and 21
orf19.7304	1.09139	0.909095	1.61314	0.318612		1.47805	Predicted ORF in Assemblies 19, 20 and 21		GO:0003843 1,3-beta-glucan synthase activity |
orf19.3727	1.11986	0.414838	1.65482	0.2934	PHO112	1.4777	Protein described as a constitutive acid phosphatase; transcription is negatively regulated by Rim101p; DTT-extractable; N-glycosylated	GO:0015888 thiamin transport |	GO:0003993 acid phosphatase activity |	GO:0030287 cell wall-bounded periplasmic space | GO:0009986 cell surface |
orf19.2274	0.893589	0.835591	1.32026	0.0558086		1.47748	Predicted ORF in Assemblies 19, 20 and 21; possibly spurious ORF (Annotation Working Group prediction)
orf19.5463	0.876985	0.34775	1.29566	0.204641		1.4774	Predicted ORF in Assemblies 19, 20 and 21	GO:0007121 bipolar cellular bud site selection | GO:0006906 vesicle fusion | GO:0048278 vesicle docking | GO:0006893 Golgi to plasma membrane transport |	GO:0005515 protein binding |	GO:0030478 actin cap | GO:0043332 mating projection tip | GO:0005934 cellular bud tip | GO:0000145 exocyst |
orf19.933	0.625073	0.530651	0.922037	0.52504		1.47509	Predicted ORF in Assemblies 19, 20 and 21; merged with orf19.2225 in Assembly 21	GO:0006513 protein monoubiquitination | GO:0000209 protein polyubiquitination | GO:0006301 postreplication repair |	GO:0004842 ubiquitin-protein ligase activity |	GO:0005634 nucleus | GO:0005737 cytoplasm | GO:0031371 ubiquitin conjugating enzyme complex |
orf19.6197	1.54106	0.502219	2.27312	0.534282		1.47504	Predicted ORF in Assemblies 19, 20 and 21	GO:0000184 nuclear-transcribed mRNA catabolic process, nonsense-mediated decay | GO:0000290 deadenylation-dependent decapping of nuclear-transcribed mRNA | GO:0034063 stress granule assembly | GO:0033962 cytoplasmic mRNA processing body assembly | GO:0000753 cellular morphogenesis during conjugation with cellular fusion |	GO:0003724 RNA helicase activity | GO:0005515 protein binding |	GO:0000932 cytoplasmic mRNA processing body |
orf19.3030	0.818231	0.0581221	1.20657	0.316424		1.47461	Predicted ORF in Assemblies 19, 20 and 21	GO:0006623 protein targeting to vacuole | GO:0006914 autophagy |		GO:0005829 cytosol |
orf19.5782	0.871756	0.662985	1.28444	0.283651		1.47339	Predicted ORF in Assemblies 19, 20 and 21			GO:0005739 mitochondrion |
orf19.2921	0.948222	0.756858	1.39474	0.208826		1.47091	Predicted ORF in Assemblies 19, 20 and 21	GO:0007023 post-chaperonin tubulin folding pathway |	GO:0051087 chaperone binding | GO:0043014 alpha-tubulin binding |	GO:0005737 cytoplasm |
orf19.6508	1.07077	0.568907	1.57473	0.0042224		1.47065	Predicted ORF in Assemblies 19, 20 and 21	GO:0006886 intracellular protein transport | GO:0006893 Golgi to plasma membrane transport |	GO:0008565 protein transporter activity |	GO:0030120 vesicle coat |
orf19.4766	0.831426	0.646784	1.22181	0.761869		1.46954	Putative transcription factor with zinc cluster DNA-binding motif; has similarity to S. cerevisiae Arg81p, which is a transcription factor involved in the regulation of arginine-responsive genes	GO:0006525 arginine metabolic process | GO:0006355 regulation of transcription, DNA-dependent | GO:0045955 negative regulation of calcium ion-dependent exocytosis |	GO:0003700 transcription factor activity | GO:0003712 transcription cofactor activity |	GO:0005634 nucleus |
orf19.5615	0.78248	0.540335	1.14923	0.751608	AYR2	1.4687	Predicted ORF in Assemblies 19, 20 and 21; shows colony morphology-related gene regulation by Ssn6p	GO:0006654 phosphatidic acid biosynthetic process |	GO:0000140 acylglycerone-phosphate reductase activity |	GO:0005811 lipid particle | GO:0005783 endoplasmic reticulum |
orf19.3567	0.952473	0.67361	1.39881	0.4724	BIO32	1.46861	Predicted ORF in Assemblies 19, 20 and 21; induced during planktonic growth	GO:0009102 biotin biosynthetic process |	GO:0004015 adenosylmethionine-8-amino-7-oxononanoate transaminase activity |	GO:0005737 cytoplasm |
orf19.3959	0.774154	0.0163954	1.13686	0.179903	SSD1	1.46852	Protein with role in resistance to host antimicrobial peptides; virulence role in murine infection; functional homolog of S. cerevisiae Ssd1p, which suppresses various mutant phenotypes; constitutively expressed and not cell-cycle regulated	GO:0007049 cell cycle | GO:0009405 pathogenesis | GO:0020012 evasion or tolerance of host immune response | GO:0001302 replicative cell aging | GO:0042493 response to drug | GO:0007047 cell wall organization |	GO:0003723 RNA binding |	GO:0005737 cytoplasm |
orf19.2433	0.763764	0.264701	1.12108	0.518725		1.46783	Predicted ORF in Assemblies 19, 20 and 21
orf19.1682	1.07843	0.177569	1.58294	0.23808		1.46782	Predicted ORF in Assemblies 19, 20 and 21; repressed by nitric oxide			GO:0005624 membrane fraction |
orf19.3937	0.854764	0.00228577	1.25353	0.332823		1.46652	Predicted ORF in Assemblies 19, 20 and 21	GO:0007165 signal transduction |		GO:0005634 nucleus | GO:0005737 cytoplasm |
orf19.1356	0.765163	0.537994	1.12129	0.640951		1.46542	Predicted ORF in Assemblies 19, 20 and 21	GO:0002098 tRNA wobble uridine modification |	GO:0004792 thiosulfate sulfurtransferase activity |	GO:0005739 mitochondrion |
orf19.816	0.655879	0.546822	0.960881	0.868295	DCK2	1.46503	Predicted ORF in Assemblies 19, 20 and 21; similar to S. cerevisiae Ylr422wp; transposon mutation affects filamentous growth; transcriptionally activated by Mnl1p under weak acid stress	GO:0030447 filamentous growth |
orf19.4656	0.899686	0.621824	1.31744	0.421184		1.46433	Predicted ORF in Assemblies 19, 20 and 21
orf19.5647	0.917997	0.625462	1.3438	0.307933	SUB2	1.46384	Transcription is regulated by Mig1p	GO:0006348 chromatin silencing at telomere | GO:0006283 transcription-coupled nucleotide-excision repair | GO:0031124 mRNA 3'-end processing | GO:0006368 RNA elongation from RNA polymerase II promoter | GO:0000398 nuclear mRNA splicing, via spliceosome | GO:0006406 mRNA export from nucleus |	GO:0031202 RNA splicing factor activity, transesterification mechanism | GO:0004004 ATP-dependent RNA helicase activity | GO:0003723 RNA binding | GO:0005515 protein binding |	GO:0005681 spliceosomal complex | GO:0000346 transcription export complex | GO:0000781 chromosome, telomeric region |
orf19.1680	0.83555	0.513729	1.223	0.575074		1.46371	Predicted ORF in Assemblies 19, 20 and 21; protein detected by mass spec in stationary phase cultures	GO:0006314 intron homing |	GO:0046961 proton-transporting ATPase activity, rotational mechanism | GO:0004520 endodeoxyribonuclease activity |	GO:0000221 vacuolar proton-transporting V-type ATPase, V1 domain |
orf19.5158	0.903267	0.637038	1.32133	0.443134		1.46284	Protein with slight similarity to a human gene associated with colon cancer and to orf19.5158; regulated by Gcn4p, Cyr1p; induced in response to amino acid starvation (3-aminotriazole treatment); macrophage-induced protein, macrophage-downregulated gene
orf19.4763	0.974345	0.717095	1.42497	0.0220652		1.46249	Protein not essential for viability
orf19.7561	1.26881	0.0200983	1.8552	0.529182	DEF1	1.46216	Protein required for filamentous growth and for escape from epithelial cells and dissemination in an RHE model; transcription induced in oral candidiasis clinical isolates; induced by fluconazole, high cell density; hyphally regulated	GO:0030447 filamentous growth | GO:0044114 development of symbiont in host | GO:0006283 transcription-coupled nucleotide-excision repair | GO:0000723 telomere maintenance | GO:0006511 ubiquitin-dependent protein catabolic process |		GO:0005634 nucleus |
orf19.71	0.846881	0.627497	1.23779	0.482351		1.46158	Predicted ORF in Assembly 19 and 21; deleted from/reinstated in Assembly 20 (see Locus History)	GO:0006888 ER to Golgi vesicle-mediated transport | GO:0007094 mitotic cell cycle spindle assembly checkpoint |		GO:0030127 COPII vesicle coat | GO:0005801 cis-Golgi network |
orf19.2919	1.05677	0.497644	1.54441	0.478266	MPH1	1.46144	Protein similar to S. cerevisiae Mph1p, which is a DNA helicase involved in DNA repair; induced under hydroxyurea treatment	GO:0060543 negative regulation of strand invasion | GO:0006281 DNA repair | GO:0033567 DNA replication, Okazaki fragment processing |	GO:0043138 3'-5' DNA helicase activity | GO:0003724 RNA helicase activity | GO:0070336 flap-structured DNA binding |	GO:0005634 nucleus |
orf19.7464	0.360253	0.445542	0.525959	0.545351		1.45997	Predicted ORF in Assemblies 19, 20 and 21; mutation confers hypersensitivity to toxic ergosterol analog	GO:0042493 response to drug |
orf19.6083	1.0086	0.889973	1.47251	0.12268		1.45995	Predicted ORF in Assemblies 19, 20 and 21
orf19.4287	0.973947	0.826904	1.42177	0.442381		1.4598	Predicted ORF in Assemblies 19, 20 and 21; clade-associated gene expression	GO:0019650 glucose catabolic process to butanediol |	GO:0000721 (R,R)-butanediol dehydrogenase activity |	GO:0005737 cytoplasm |
orf19.1468	0.752356	0.488448	1.09798	0.845827		1.45939	Predicted ORF in Assemblies 19, 20 and 21	GO:0007117 budding cell bud growth | GO:0007015 actin filament organization | GO:0006412 translation | GO:0007124 pseudohyphal growth | GO:0001100 negative regulation of exit from mitosis | GO:0007094 mitotic cell cycle spindle assembly checkpoint |		GO:0000159 protein phosphatase type 2A complex | GO:0005934 cellular bud tip | GO:0005634 nucleus | GO:0005935 cellular bud neck |
orf19.7022	1.03467	0.87576	1.50866	0.0162851		1.4581	Predicted ORF in Assemblies 19, 20 and 21
orf19.2828	0.976419	0.940689	1.42344	0.514124		1.45782	Predicted ORF in Assemblies 19, 20 and 21	GO:0007023 post-chaperonin tubulin folding pathway |	GO:0051087 chaperone binding | GO:0008017 microtubule binding | GO:0043014 alpha-tubulin binding |	GO:0005874 microtubule | GO:0005634 nucleus | GO:0005737 cytoplasm |
orf19.4676	0.876183	0.785622	1.277	0.823635		1.45746	Predicted ORF in Assemblies 19, 20 and 21
orf19.4056	0.973207	0.716117	1.41708	0.5771	GAT2	1.45609	Putative DNA-binding transcription factor; similar to S. cerevisiae Gat2p; transposon mutation affects filamentous growth	GO:0030447 filamentous growth | GO:0006350 transcription |	GO:0003700 transcription factor activity |	GO:0005634 nucleus |
orf19.6941	0.977231	0.753708	1.42246	0.125887		1.45561	Predicted ORF in Assemblies 19, 20 and 21	GO:0019432 triglyceride biosynthetic process | GO:0019915 lipid storage |	GO:0004144 diacylglycerol O-acyltransferase activity |	GO:0005811 lipid particle |
orf19.3496	0.766097	0.23073	1.11502	0.770243		1.45545	Predicted ORF in Assemblies 19, 20 and 21	GO:0006897 endocytosis |	GO:0005198 structural molecule activity |	GO:0030125 clathrin vesicle coat |
orf19.2938	1.1509	0.308771	1.67505	0.0551622		1.45543	Protein not essential for viability			GO:0005739 mitochondrion |
orf19.3710	1.05334	0.52087	1.53259	0.0766157	YHB5	1.45498	Protein related to flavohemoglobins; not required for wild-type nitric oxide resistance; has predicted globin, FAD-binding, and NAD(P)-binding domains but lacks some conserved residues of flavohemoglobins; mRNA detected; filament induced	GO:0006950 response to stress |	GO:0008941 nitric oxide dioxygenase activity |
orf19.5295	0.697761	0.414224	1.01509	0.969773		1.45478	Predicted ORF in Assemblies 19, 20 and 21; transcription is induced in response to alpha pheromone in SpiderM medium
orf19.7598	0.597824	0.56994	0.869518	0.544839		1.45447	Predicted ORF in Assemblies 19, 20 and 21	GO:0006337 nucleosome disassembly |		GO:0005671 Ada2/Gcn5/Ada3 transcription activator complex |
orf19.4773	1.13583	0.274213	1.65194	0.527511	AOX2	1.45439	Alternative oxidase; induced by antimycin A, some oxidants; growth- and carbon-source-regulated; one of two isoforms (Aox1p and Aox2p); involved in cyanide-resistant respiratory pathway that is absent from S. cerevisiae	GO:0045333 cellular respiration | GO:0009060 aerobic respiration |	GO:0009916 alternative oxidase activity |	GO:0005739 mitochondrion | GO:0005886 plasma membrane |
orf19.3001	0.961218	0.786804	1.39669	0.375091	TEM1	1.45304	Protein similar to S. cerevisiae Tem1p, which is a GTPase involved in termination of the M phase of the cell cycle; induced under Cdc5p depletion	GO:0007165 signal transduction | GO:0000087 M phase of mitotic cell cycle |	GO:0003924 GTPase activity | GO:0005515 protein binding |	GO:0005816 spindle pole body |
orf19.6043	0.855041	0.217785	1.24203	0.153733		1.4526	Predicted ORF in Assemblies 19, 20 and 21	GO:0005975 carbohydrate metabolic process | GO:0009060 aerobic respiration |	GO:0004458 D-lactate dehydrogenase (cytochrome) activity |	GO:0005743 mitochondrial inner membrane |
orf19.2786	0.72404	0.249573	1.05172	0.510683		1.45258	Predicted ORF in Assemblies 19, 20 and 21	GO:0016192 vesicle-mediated transport |		GO:0030122 AP-2 adaptor complex |
orf19.211	0.696136	0.184596	1.01076	0.962673		1.45196	Predicted ORF in Assemblies 19, 20 and 21
orf19.2972	1.00481	0.951393	1.45883	0.309103	PDE2	1.45185	Cyclic nucleotide phosphodiesterase, high affinity; role in moderating signaling via cAMP; required for wild-type virulence, hyphal growth, switching, and cell wall, but not for pseudohyphal growth; expressed shortly after hyphal induction	GO:0009405 pathogenesis | GO:0030447 filamentous growth | GO:0030448 hyphal growth | GO:0019933 cAMP-mediated signaling | GO:0042493 response to drug | GO:0007009 plasma membrane organization | GO:0007047 cell wall organization | GO:0044406 adhesion to host |	GO:0004112 cyclic-nucleotide phosphodiesterase activity | GO:0004115 3',5'-cyclic-AMP phosphodiesterase activity |	GO:0005634 nucleus | GO:0005737 cytoplasm |
orf19.4919	0.893583	0.411632	1.2973	0.446284		1.4518	Predicted ORF in Assemblies 19, 20 and 21
orf19.3690.2	0.933888	0.597495	1.35522	0.125257		1.45116	ORF Predicted by Annotation Working Group	GO:0006412 translation |	GO:0003723 RNA binding | GO:0003735 structural constituent of ribosome |	GO:0022625 cytosolic large ribosomal subunit |
orf19.4106	1.01676	0.806068	1.47539	0.142277		1.45107	Predicted ORF in Assemblies 19, 20 and 21
orf19.441	0.720652	0.394273	1.0449	0.881659	RPT1	1.44994	Predicted ORF in Assemblies 19, 20 and 21; regulated by Gcn2p and Gcn4p	GO:0006511 ubiquitin-dependent protein catabolic process |	GO:0004175 endopeptidase activity | GO:0016887 ATPase activity |	GO:0008540 proteasome regulatory particle, base subcomplex |
orf19.4362	0.878019	0.232837	1.27305	0.577165		1.44991	Predicted ORF in Assemblies 19, 20 and 21	GO:0006626 protein targeting to mitochondrion |	GO:0016887 ATPase activity |	GO:0005741 mitochondrial outer membrane |
orf19.804.1	1.09888	0.847142	1.59286	0.538031		1.44953	ORF added to Assembly 21 based on comparative genome analysis
orf19.2095	0.975762	0.674541	1.41321	0.0377324		1.44832	Predicted ORF in Assemblies 19, 20 and 21	GO:0034396 negative regulation of transcription from RNA polymerase II promoter in response to iron |		GO:0005829 cytosol |
orf19.2131	0.829252	0.635432	1.20072	0.434302		1.44795	Predicted ORF in Assemblies 19, 20 and 21	GO:0043162 ubiquitin-dependent protein catabolic process via the multivesicular body sorting pathway | GO:0016567 protein ubiquitination |	GO:0004842 ubiquitin-protein ligase activity |	GO:0005794 Golgi apparatus |
orf19.4406	0.668582	0.503848	0.967954	0.961566		1.44777	Predicted ORF in Assemblies 19, 20 and 21			GO:0005739 mitochondrion |
orf19.4208	1.05943	0.86431	1.53323	0.562165	RAD52	1.44722	Required for homologous DNA recombination, repair of UV- or MMS-damaged DNA, telomere length, UV-induced LOH; constitutive expression, MMS-induced; weakly complements S. cerevisiae rad52 mutant; slow growth, increased white-to-opaque switch	GO:0000723 telomere maintenance | GO:0010212 response to ionizing radiation | GO:0000724 double-strand break repair via homologous recombination | GO:0009411 response to UV | GO:0000707 meiotic DNA recombinase assembly | GO:0000727 double-strand break repair via break-induced replication | GO:0009405 pathogenesis | GO:0006312 mitotic recombination | GO:0042493 response to drug | GO:0006979 respon…	GO:0003677 DNA binding | GO:0000150 recombinase activity | GO:0000739 DNA strand annealing activity |	GO:0000228 nuclear chromosome |
orf19.7204	0.749094	0.613005	1.0839	0.817611		1.44695	Predicted ORF in Assemblies 19, 20 and 21			GO:0005737 cytoplasm |
orf19.418	0.893613	0.729345	1.29284	0.577128	KOG1	1.44675	Protein likely to be essential for growth, based on an insertional mutagenesis strategy; heterozygous null mutant displays sensitivity to rapamycin	GO:0009267 cellular response to starvation | GO:0001558 regulation of cell growth |		GO:0005739 mitochondrion | GO:0005624 membrane fraction | GO:0000329 fungal-type vacuole membrane | GO:0031931 TORC1 complex | GO:0005886 plasma membrane |
orf19.4595	0.785261	0.145318	1.13528	0.786981		1.44573	Predicted ORF in Assemblies 19, 20 and 21; possibly spurious ORF (Annotation Working Group prediction)
orf19.3022	1.11191	0.734816	1.60643	0.0781239		1.44475	Predicted ORF in Assemblies 19, 20 and 21		GO:0003735 structural constituent of ribosome |	GO:0005763 mitochondrial small ribosomal subunit |
orf19.5806	0.999115	0.99906	1.44334	0.536028	ALD5	1.44462	Protein described as an aldehyde dehydrogenase; decreased expression in fluconazole-resistant isolate, or in hyphae; biofilm induced;fluconazole-downregulated; protein abundance is affected by URA3 expression in the CAI-4 strain background	GO:0019413 acetate biosynthetic process |	GO:0004028 3-chloroallyl aldehyde dehydrogenase activity | GO:0004030 aldehyde dehydrogenase [NAD(P)+] activity |	GO:0005625 soluble fraction | GO:0005739 mitochondrion |
orf19.7029	1.00079	0.997901	1.44434	0.198815		1.44321	Predicted ORF in Assemblies 19, 20 and 21; mutation confers hypersensitivity to toxic ergosterol analog	GO:0042493 response to drug |	GO:0008892 guanine deaminase activity |	GO:0005737 cytoplasm |
orf19.4850	0.789219	0.61186	1.13842	0.705698		1.44247	Predicted ORF in Assemblies 19, 20 and 21			GO:0005634 nucleus | GO:0005737 cytoplasm |
orf19.6634	0.777052	0.617903	1.12049	0.770587	VMA2	1.44198	Predicted ORF in Assemblies 19, 20 and 21; amphotericin B repressed, caspofungin repressed; protein detected by mass spec in exponential and stationary phase cultures	GO:0007035 vacuolar acidification | GO:0055085 transmembrane transport | GO:0006874 cellular calcium ion homeostasis |	GO:0046961 proton-transporting ATPase activity, rotational mechanism |	GO:0000329 fungal-type vacuole membrane | GO:0000221 vacuolar proton-transporting V-type ATPase, V1 domain | GO:0005886 plasma membrane |
orf19.5757	0.861213	0.446671	1.24089	0.259272		1.44087	Predicted ORF in Assemblies 19, 20 and 21			GO:0005634 nucleus | GO:0005737 cytoplasm |
orf19.4913	0.726117	0.699853	1.04591	0.90109		1.44042	Predicted ORF in Assemblies 19, 20 and 21			GO:0005737 cytoplasm |
orf19.4295	0.900676	0.513886	1.29711	0.628158		1.44015	Predicted ORF in Assemblies 19, 20 and 21
orf19.4520	0.724538	0.529109	1.04256	0.854384		1.43893	Predicted ORF in Assemblies 19, 20 and 21			GO:0005737 cytoplasm |
orf19.1212	0.672339	0.0534485	0.967345	0.91334		1.43878	Predicted ORF in Assemblies 19, 20 and 21	GO:0006020 inositol metabolic process |		GO:0016021 integral to membrane | GO:0005783 endoplasmic reticulum |
orf19.799	1.02978	0.476698	1.4809	0.338403	STE4	1.43808	Beta subunit of heterotrimeric G protein of mating signal transduction pathway; required for mating; transcription is specific to cells homozygous at MTL and is induced by alpha pheromone; similar to S. cerevisiae Ste4p	GO:0000753 cellular morphogenesis during conjugation with cellular fusion | GO:0000750 pheromone-dependent signal transduction involved in conjugation with cellular fusion | GO:0031684 heterotrimeric G-protein complex cycle | GO:0001403 invasive growth in response to glucose limitation |	GO:0003924 GTPase activity | GO:0004871 signal transducer activity |	GO:0005834 heterotrimeric G-protein complex | GO:0005937 mating projection |
orf19.410.3	0.770474	0.570914	1.10729	0.842659		1.43715	Lumazine synthase (6,7-dimethyl-8-ribityllumazine synthase, DMRL synthase); catalyzes the penultimate step in the synthesis of riboflavin	GO:0009231 riboflavin biosynthetic process |	GO:0004746 riboflavin synthase activity | GO:0000906 6,7-dimethyl-8-ribityllumazine synthase activity |	GO:0005634 nucleus | GO:0005737 cytoplasm |
orf19.92	0.884792	0.791482	1.27149	0.604735		1.43705	Predicted ORF in Assemblies 19, 20 and 21; increased expression in response to prostaglandins
orf19.446.2	0.972728	0.884149	1.39646	0.349751		1.43561	Predicted ORF in Assembly 20 and 21; gene has intron
orf19.4381	1.20209	0.34937	1.72446	0.0326948	VTC3	1.43455	Putative polyphosphate synthetase; downregulated in core caspofungin response; Hog1p-induced; transcription is opaque-specific; fungal-specific (no human or murine homolog)	GO:0016237 microautophagy | GO:0008104 protein localization | GO:0007034 vacuolar transport | GO:0042144 vacuole fusion, non-autophagic |		GO:0033254 vacuolar transporter chaperone complex | GO:0005783 endoplasmic reticulum | GO:0005774 vacuolar membrane |
orf19.3870	0.708877	0.357023	1.01645	0.942755	ADE13	1.43389	Enzyme of adenine biosynthesis; soluble protein in hyphae; not induced during GCN response, in contrast to the S. cerevisiae ortholog; repressed by nitric oxide	GO:0006144 purine base metabolic process | GO:0006189 'de novo' IMP biosynthetic process |	GO:0004018 N6-(1,2-dicarboxyethyl)AMP AMP-lyase (fumarate-forming) activity |	GO:0005625 soluble fraction |
orf19.4090	0.864751	0.674611	1.23984	0.807013		1.43375	Predicted membrane transporter, member of the fucose:proton symporter (FHS) family, major facilitator superfamily (MFS)	GO:0015756 fucose transport |	GO:0015535 fucose |	GO:0016020 membrane |
orf19.2068	0.979314	0.903452	1.4034	0.030083		1.43305	Predicted ORF in Assemblies 19, 20 and 21
orf19.651	0.945746	0.117918	1.35479	0.280448	LYP1	1.43251	Predicted ORF in Assemblies 19, 20 and 21; amphotericin B induced; flucytosine repressed	GO:0015802 basic amino acid transport |	GO:0015174 basic amino acid transmembrane transporter activity |	GO:0005886 plasma membrane |
orf19.4236	0.979214	0.885354	1.40239	0.403712	RET2	1.43215	Protein that interacts with Crk1p in the two-hybrid system; potential ortholog of S. cerevisiae Ret2p	GO:0006888 ER to Golgi vesicle-mediated transport | GO:0051645 Golgi localization | GO:0048313 Golgi inheritance | GO:0006890 retrograde vesicle-mediated transport, Golgi to ER |	GO:0005515 protein binding |	GO:0030126 COPI vesicle coat |
orf19.4478	1.09215	0.779422	1.56321	0.664538		1.43131	Predicted ORF in Assemblies 19, 20 and 21	GO:0070146 mitochondrial aspartyl-tRNA aminoacylation |	GO:0004815 aspartate-tRNA ligase activity |	GO:0005739 mitochondrion |
orf19.1180	0.870577	0.687316	1.24592	0.53596		1.43114	Predicted ORF in Assemblies 19, 20 and 21		GO:0047536 2-aminoadipate transaminase activity |	GO:0005634 nucleus | GO:0005737 cytoplasm |
orf19.4251	1.02057	0.936267	1.45994	0.146957		1.43051	Predicted zinc-finger protein of unknown function	GO:0045836 positive regulation of meiosis | GO:0007068 negative regulation of transcription, mitotic |	GO:0030528 transcription regulator activity | GO:0003677 DNA binding |	GO:0005634 nucleus |
orf19.3593	0.831933	0.57691	1.19008	0.245676	RPT6	1.43051	Predicted ORF in Assemblies 19, 20 and 21; transcription is regulated by Mig1p; regulated by Gcn2p and Gcn4p	GO:0006511 ubiquitin-dependent protein catabolic process |	GO:0004175 endopeptidase activity | GO:0016887 ATPase activity |	GO:0005634 nucleus | GO:0008540 proteasome regulatory particle, base subcomplex | GO:0034515 proteasome storage granule |
orf19.4524	0.938355	0.762781	1.34209	0.339613		1.43026	Predicted zinc-finger protein of unknown function; caspofungin induced	GO:0006350 transcription |
orf19.6171	0.837029	0.473466	1.19632	0.744392		1.42924	Predicted ORF in Assemblies 19, 20 and 21	GO:0000054 ribosome export from nucleus | GO:0006407 rRNA export from nucleus | GO:0006999 nuclear pore organization | GO:0006406 mRNA export from nucleus |	GO:0005198 structural molecule activity |	GO:0005643 nuclear pore |
orf19.6991	0.694562	0.420778	0.991544	0.93698	PRE3	1.42758	Protein described as beta-1 subunit of proteasome; macrophage-induced protein; regulated by Gcn2p and Gcn4p	GO:0006511 ubiquitin-dependent protein catabolic process | GO:0006950 response to stress |	GO:0004175 endopeptidase activity |	GO:0019774 proteasome core complex, beta-subunit complex | GO:0034515 proteasome storage granule |
orf19.7434	0.952263	0.771714	1.35756	0.219981	GLG2	1.42561	Protein described as self-glucosylating initiator of glycogen synthesis; expression is regulated upon white-opaque switching; hyphal-induced	GO:0005978 glycogen biosynthetic process |	GO:0008466 glycogenin glucosyltransferase activity |	GO:0005737 cytoplasm |
orf19.4426	0.931755	0.777921	1.32794	0.555061	PEX3	1.42521	Putative peroxisomal protein involved in targeting proteins into peroxisomes	GO:0032581 ER-dependent peroxisome biogenesis | GO:0045046 protein import into peroxisome membrane |	GO:0005515 protein binding |	GO:0005778 peroxisomal membrane | GO:0005783 endoplasmic reticulum |
orf19.2182	0.678414	0.231439	0.96682	0.868617	BLM3	1.42512	Predicted ORF in Assemblies 19, 20 and 21; similar to S. cerevisiae Blm10p; transcription is regulated by Nrg1p and Mig1p	GO:0030163 protein catabolic process | GO:0043248 proteasome assembly |	GO:0008538 proteasome activator activity |	GO:0005634 nucleus | GO:0005839 proteasome core complex |
orf19.7109	0.70023	0.110807	0.997909	0.996314		1.42512	Predicted ORF in Assemblies 19, 20 and 21
orf19.5970	0.918276	0.698713	1.30861	0.352089		1.42508	Protein described as a DNA repair helicase; transcriptionally induced by interaction with macrophage; fungal-specific (no human or murine homolog)	GO:0032508 DNA duplex unwinding | GO:0006303 double-strand break repair via nonhomologous end joining |	GO:0003678 DNA helicase activity |	GO:0005634 nucleus |
orf19.5861.1	0.556095	0.496382	0.79227	0.298748		1.4247	ORF added to Assembly 21 based on comparative genome analysis
orf19.3128	0.799784	0.38226	1.139	0.485884		1.42413	Predicted ORF in Assemblies 19, 20 and 21	GO:0006888 ER to Golgi vesicle-mediated transport | GO:0045053 protein retention in Golgi apparatus | GO:0006890 retrograde vesicle-mediated transport, Golgi to ER |	GO:0000149 SNARE binding |	GO:0030134 ER to Golgi transport vesicle | GO:0005783 endoplasmic reticulum |
orf19.6821	0.934481	0.7881	1.3305	0.144794		1.42379	Predicted ORF in Assemblies 19, 20 and 21	GO:0000022 mitotic spindle elongation | GO:0007091 mitotic metaphase/anaphase transition | GO:0000070 mitotic sister chromatid segregation | GO:0008054 cyclin catabolic process | GO:0016567 protein ubiquitination | GO:0031145 anaphase-promoting complex-dependent proteasomal ubiquitin-dependent protein catabolic process |	GO:0004842 ubiquitin-protein ligase activity | GO:0005515 protein binding |	GO:0005680 anaphase-promoting complex |
orf19.3986	0.993346	0.939667	1.41396	0.411278		1.42343	Putative transcription factor with zinc cluster DNA-binding motif; has similarity to S. cerevisiae Ppr1p, which is a transcription factor involved in the regulation of uracil biosynthesis genes	GO:0046107 uracil biosynthetic process | GO:0006355 regulation of transcription, DNA-dependent |	GO:0003700 transcription factor activity |	GO:0005634 nucleus |
orf19.5191	1.17824	0.623046	1.67676	0.548771	FGR6-1	1.4231	Protein lacking an ortholog in S. cerevisiae; member of a family encoded by FGR6-related genes in the RB2 repeat sequence; transposon mutation affects filamentous growth	GO:0030447 filamentous growth |
orf19.4440	0.87555	0.303729	1.24583	0.679345	SEC34	1.42291	Protein not essential for viability; similar to S. cerevisiae Cog3p, which is a component of the conserved oligomeric Golgi complex involved in intracellular protein trafficking	GO:0006888 ER to Golgi vesicle-mediated transport | GO:0000301 retrograde transport, vesicle recycling within Golgi |	GO:0008565 protein transporter activity |	GO:0000300 peripheral to membrane of membrane fraction | GO:0017119 Golgi transport complex | GO:0005625 soluble fraction |
orf19.7235	0.916352	0.671884	1.30354	0.375541		1.42253	Predicted ORF in Assemblies 19, 20 and 21; mutation confers hypersensitivity to amphotericin B	GO:0042493 response to drug |
orf19.6063	0.70622	0.0354808	1.00402	0.993474	UBP6	1.42168	Predicted ORF in Assemblies 19, 20 and 21; oxidative stress-induced via Cap1p	GO:0016579 protein deubiquitination |	GO:0004843 ubiquitin-specific protease activity |	GO:0005838 proteasome regulatory particle |
orf19.4703	1.04384	0.234723	1.48394	0.180779		1.42161	Predicted ORF in Assemblies 19, 20 and 21; has similarity to mutator-like element (MULE) transposase
orf19.3815	0.839532	0.692104	1.1931	0.256899		1.42114	Predicted ORF in Assemblies 19, 20 and 21		GO:0004843 ubiquitin-specific protease activity |
orf19.7518	0.768929	0.598428	1.09251	0.64721		1.42083	Putative transcription factor with zinc cluster DNA-binding motif	GO:0006367 transcription initiation from RNA polymerase II promoter | GO:0009651 response to salt stress | GO:0006355 regulation of transcription, DNA-dependent |	GO:0003704 specific RNA polymerase II transcription factor activity | GO:0003700 transcription factor activity |	GO:0005634 nucleus |
orf19.3448	1.57881	0.0696948	2.24286	0.263566		1.4206	Predicted ORF in Assemblies 19, 20 and 21; ketoconazole-repressed; possibly spurious ORF (Annotation Working Group prediction)
orf19.1037	1.25868	0.107988	1.78777	0.556397		1.42036	Predicted ORF in Assemblies 19, 20 and 21
orf19.6506	0.815164	0.0412388	1.15753	0.200911		1.42	Predicted ORF in Assemblies 19, 20 and 21	GO:0016575 histone deacetylation |	GO:0004407 histone deacetylase activity |	GO:0032221 Rpd3S complex |
orf19.4744	0.920667	0.670389	1.30644	0.566026		1.41901	Predicted ORF in Assemblies 19, 20 and 21; transcription is repressed in response to alpha pheromone in SpiderM medium	GO:0046856 phosphoinositide dephosphorylation |	GO:0004438 phosphatidylinositol-3-phosphatase activity |	GO:0005737 cytoplasm |
orf19.1105.2	0.730918	0.0636292	1.03712	0.729479	PGA56	1.41893	Regulator of sorbose utilization; putative GPI-anchor; predicted helix-loop helix domain; hyphal induced; induced during cell wall regeneration; shows colony morphology-related gene regulation by Ssn6p; transcription activated by Tbf1p	GO:0042850 L-sorbose catabolic process |		GO:0009986 cell surface | GO:0005634 nucleus |
orf19.4872	0.384735	0.464225	0.545804	0.522891		1.41865	Protein not essential for viability; possibly spurious ORF (Annotation Working Group prediction); transcriptionally activated by Mnl1p under weak acid stress
orf19.3490	1.25174	0.655873	1.77463	0.599489	FGR6-4	1.41773	Protein lacking an ortholog in S. cerevisiae; member of a family encoded by FGR6-related genes in the RB2 repeat sequence; transposon mutation affects filamentous growth	GO:0030447 filamentous growth |
orf19.2263	0.528991	0.163394	0.749961	0.693674		1.41772	Predicted ORF in Assemblies 19, 20 and 21
orf19.5394.1	0.901917	0.806615	1.27778	0.529044		1.41674	ORF Predicted by Annotation Working Group	GO:0033617 mitochondrial respiratory chain complex IV assembly |		GO:0031305 integral to mitochondrial inner membrane |
orf19.5054	0.797931	0.554977	1.13021	0.797669		1.41643	Putative quinolinate phosphoribosyl transferase, involved in NAD biosynthesis	GO:0034354 de novo NAD biosynthetic process from tryptophan |	GO:0004514 nicotinate-nucleotide diphosphorylase (carboxylating) activity |	GO:0005634 nucleus | GO:0005737 cytoplasm |
orf19.4523	0.97472	0.753502	1.38048	0.427882		1.41629	Predicted ORF in Assemblies 19, 20 and 21	GO:0009396 folic acid and derivative biosynthetic process |	GO:0030272 5-formyltetrahydrofolate cyclo-ligase activity |	GO:0005739 mitochondrion |
orf19.5536	0.831418	0.419118	1.17725	0.347056		1.41596	Predicted ORF in Assemblies 19, 20 and 21		GO:0004040 amidase activity |
orf19.2671	0.903168	0.840748	1.2784	0.578485		1.41546	Predicted ORF in Assemblies 19, 20 and 21; Plc1p-regulated	GO:0000304 response to singlet oxygen |		GO:0005886 plasma membrane |
orf19.1089	0.907108	0.709225	1.28365	0.493467	PEX11	1.4151	Putative protein involved in fatty acid oxidation; expression is Tac1p-dependent	GO:0019395 fatty acid oxidation | GO:0016559 peroxisome fission |		GO:0005778 peroxisomal membrane |
orf19.2073	0.948382	0.893088	1.34187	0.0772779		1.4149	Predicted ORF in Assemblies 19, 20 and 21; transcriptionally activated by Mnl1p under weak acid stress
orf19.7038	0.849663	0.706324	1.20102	0.0788146		1.41352	Predicted ORF in Assemblies 19, 20 and 21	GO:0006623 protein targeting to vacuole |	GO:0032266 phosphatidylinositol 3-phosphate binding |	GO:0005737 cytoplasm |
orf19.6861	0.953836	0.835285	1.3481	0.303396		1.41335	Predicted ORF in Assemblies 19, 20 and 21	GO:0000022 mitotic spindle elongation | GO:0007091 mitotic metaphase/anaphase transition | GO:0000070 mitotic sister chromatid segregation | GO:0008054 cyclin catabolic process |	GO:0004842 ubiquitin-protein ligase activity | GO:0005515 protein binding |	GO:0005680 anaphase-promoting complex |
orf19.5112	0.598906	0.0113274	0.846006	0.221599	TKL1	1.41259	Putative transketolase; localizes to surface of yeast-form cells, but not hyphae; soluble protein in hyphae; transcription is regulated by Nrg1p, Mig1p, and Tup1p; antigenic in human or murine infection	GO:0006098 pentose-phosphate shunt |	GO:0004802 transketolase activity |	GO:0030445 yeast-form cell wall | GO:0009986 cell surface | GO:0005625 soluble fraction | GO:0005737 cytoplasm | GO:0005886 plasma membrane |
orf19.1766	0.91608	0.114476	1.29339	0.26764		1.41188	Predicted ORF in Assemblies 19, 20 and 21
orf19.2370	0.911878	0.859922	1.2873	0.462245	DSL1	1.4117	Protein similar to S. cerevisiae Dsl1p, which is a member of the t-SNARE complex of the endoplasmic reticulum			GO:0005783 endoplasmic reticulum |
orf19.5076	0.8059	0.530711	1.1363	0.323402	PFY1	1.40997	Profilin, functional homolog of S. cerevisiae Pfy1p; hyphal-induced; macrophage/pseudohyphal-induced; regulated by Nrg1p, Tup1p; gene lacks intron (unlike S. cerevisiae PFY1); complements growth of S. cerevisiae srv2 mutant; nonessential	GO:0008154 actin polymerization or depolymerization | GO:0006970 response to osmotic stress | GO:0007121 bipolar cellular bud site selection | GO:0046907 intracellular transport | GO:0007120 axial cellular bud site selection |	GO:0003779 actin binding | GO:0003785 actin monomer binding |	GO:0005886 plasma membrane | GO:0005737 cytoplasm | GO:0000142 cellular bud neck contractile ring | GO:0030478 actin cap |
orf19.1352	0.97478	0.970582	1.37361	0.61641		1.40915	Predicted ORF in Assemblies 19, 20 and 21	GO:0045039 protein import into mitochondrial inner membrane |	GO:0008565 protein transporter activity |	GO:0005744 mitochondrial inner membrane presequence translocase complex | GO:0042721 mitochondrial inner membrane protein insertion complex | GO:0005886 plasma membrane |
orf19.7463	0.641837	0.201312	0.904229	0.532548		1.40881	Predicted ORF in Assemblies 19, 20 and 21
orf19.7356	1.05692	0.215936	1.48813	0.00729477		1.40799	Predicted ORF in Assemblies 19, 20 and 21; possibly spurious ORF (Annotation Working Group prediction)
orf19.164	0.799185	0.178566	1.12524	0.73883		1.40798	Predicted ORF in Assemblies 19, 20 and 21		GO:0016298 lipase activity |	GO:0005782 peroxisomal matrix |
orf19.5129	1.07261	0.777798	1.50956	0.232259		1.40737	Predicted ORF in Assemblies 19, 20 and 21
orf19.4869	0.871624	0.739747	1.22661	0.711372	SFU1	1.40727	Transcriptional regulator of iron-responsive genes; represses some iron utilization genes when iron is present; not required for wild-type hyphal growth; has two GATA1-like zinc fingers separated by Cys-rich iron-sensing region	GO:0006879 cellular iron ion homeostasis | GO:0010039 response to iron ion | GO:0045944 positive regulation of transcription from RNA polymerase II promoter | GO:0000122 negative regulation of transcription from RNA polymerase II promoter | GO:0006807 nitrogen compound metabolic process | GO:0033217 regulation of transcription from RNA polymerase II promoter in response to iron ion starvation |	GO:0003700 transcription factor activity | GO:0003677 DNA binding |	GO:0005634 nucleus |
orf19.4657	1.16322	0.691032	1.63658	0.27644		1.40694	Predicted ORF in Assemblies 19, 20 and 21	GO:0030437 ascospore formation | GO:0046890 regulation of lipid biosynthetic process | GO:0006998 nuclear envelope organization |	GO:0004721 phosphoprotein phosphatase activity |	GO:0005739 mitochondrion | GO:0042175 nuclear envelope-endoplasmic reticulum network | GO:0016021 integral to membrane |
orf19.482	0.782071	0.518967	1.10024	0.668602	RPT4	1.40682	Predicted ORF in Assemblies 19, 20 and 21; regulated by Gcn2p and Gcn4p; protein level decreased in stationary phase cultures	GO:0006511 ubiquitin-dependent protein catabolic process |	GO:0004175 endopeptidase activity | GO:0016887 ATPase activity |	GO:0005634 nucleus | GO:0008540 proteasome regulatory particle, base subcomplex |
orf19.4824	1.23242	0.509386	1.73314	0.487277		1.40629	Predicted ORF in Assemblies 19, 20 and 21
orf19.5597.1	0.888693	0.642525	1.24962	0.191622		1.40614	ORF added to Assembly 21 based on comparative genome analysis
orf19.6918	1.09519	0.752274	1.53993	0.37487		1.40608	Predicted ORF in Assemblies 19, 20 and 21
orf19.4721	1.07845	0.718424	1.51601	0.520182		1.40573	Predicted ORF in Assemblies 19, 20 and 21; possibly spurious ORF (Annotation Working Group prediction)
orf19.6217	0.857052	0.749584	1.20443	0.71031	PGA63	1.40532	Putative protein of unknown function	GO:0006888 ER to Golgi vesicle-mediated transport |	GO:0005198 structural molecule activity |	GO:0030127 COPII vesicle coat | GO:0043332 mating projection tip |
orf19.4023	1.0431	0.850247	1.46567	0.306351	MRP2	1.40511	Protein similar to S. cerevisiae Mrp2p, which is a component of the small subunit of the mitochondrial ribosome; transposon mutation affects filamentous growth	GO:0030447 filamentous growth |	GO:0003735 structural constituent of ribosome |	GO:0005763 mitochondrial small ribosomal subunit |
orf19.2057	0.760869	0.112826	1.06723	0.82511		1.40265	Predicted ORF in Assemblies 19, 20 and 21	GO:0006461 protein complex assembly | GO:0006508 proteolysis | GO:0006465 signal peptide processing |	GO:0016887 ATPase activity | GO:0008237 metallopeptidase activity |	GO:0005745 m-AAA complex |
orf19.3623	0.934741	0.409841	1.31091	0.270424	SMC2	1.40243	Protein similar to S. cerevisiae Smc2p, which is a component of the condensin complex involved in mitotic chromosome condensation; induced under hydroxyurea treatment	GO:0007076 mitotic chromosome condensation | GO:0070058 tRNA gene clustering |	GO:0003690 double-stranded DNA binding | GO:0000217 DNA secondary structure binding | GO:0003680 AT DNA binding | GO:0016887 ATPase activity |	GO:0005739 mitochondrion | GO:0000799 nuclear condensin complex |
orf19.6151	0.632521	0.371368	0.886798	0.826614	ARC15	1.40201	Predicted ORF in Assemblies 19, 20 and 21; mutation confers hypersensitivity to cytochalasin D	GO:0042493 response to drug | GO:0000001 mitochondrion inheritance | GO:0000147 actin cortical patch assembly |	GO:0005198 structural molecule activity |	GO:0005885 Arp2/3 protein complex | GO:0031315 extrinsic to mitochondrial outer membrane |
orf19.6422	0.930528	0.875574	1.30445	0.359435	SSY5	1.40184	Protein similar to S. cerevisiae Ssy5p, which is a component of a complex that senses external amino acids	GO:0007606 sensory perception of chemical stimulus | GO:0043200 response to amino acid stimulus | GO:0016485 protein processing |	GO:0016597 amino acid binding | GO:0004252 serine-type endopeptidase activity |	GO:0019897 extrinsic to plasma membrane |
orf19.1977	0.819481	0.119398	1.14876	0.341604	URA4	1.40182	Predicted ORF in Assemblies 19, 20 and 21; protein detected by mass spec in exponential and stationary phase cultures	GO:0006207 'de novo' pyrimidine base biosynthetic process | GO:0006221 pyrimidine nucleotide biosynthetic process |	GO:0004151 dihydroorotase activity |	GO:0005634 nucleus | GO:0005737 cytoplasm |
orf19.1653	1.2554	0.667081	1.75963	0.756923		1.40165	Predicted ORF in Assemblies 19, 20 and 21; possibly spurious ORF (Annotation Working Group prediction)
orf19.2067	0.879189	0.648436	1.23224	0.276052		1.40156	Predicted ORF in Assemblies 19, 20 and 21	GO:0006880 intracellular sequestering of iron ion | GO:0016226 iron-sulfur cluster assembly |		GO:0005759 mitochondrial matrix |
orf19.5768	0.88414	0.826197	1.23844	0.762588	SNF4	1.40073	Protein similar to S. cerevisiae Snf4p transcriptional regulator; caspofungin repressed; transposon mutation affects filamentous growth	GO:0030447 filamentous growth | GO:0006468 protein amino acid phosphorylation | GO:0001302 replicative cell aging | GO:0045722 positive regulation of gluconeogenesis | GO:0007031 peroxisome organization | GO:0006357 regulation of transcription from RNA polymerase II promoter |	GO:0004679 AMP-activated protein kinase activity | GO:0043539 protein serine/threonine kinase activator activity |	GO:0005641 nuclear envelope lumen | GO:0005737 cytoplasm | GO:0031588 AMP-activated protein kinase complex | GO:0005886 plasma membrane |
orf19.4416	0.972507	0.764448	1.36202	0.0353486	VPS13	1.40052	Predicted ORF in Assemblies 19, 20 and 21; gene used for multilocus sequence typing	GO:0045324 late endosome to vacuole transport | GO:0030437 ascospore formation | GO:0045053 protein retention in Golgi apparatus | GO:0007039 vacuolar protein catabolic process |		GO:0005739 mitochondrion | GO:0005768 endosome | GO:0019898 extrinsic to membrane |
orf19.4967	0.795411	0.677247	1.11376	0.783725	COX19	1.40023	Predicted ORF in Assemblies 19, 20 and 21; Plc1p-regulated	GO:0030001 metal ion transport | GO:0033617 mitochondrial respiratory chain complex IV assembly |	GO:0046873 metal ion transmembrane transporter activity | GO:0005507 copper ion binding |	GO:0005829 cytosol | GO:0005758 mitochondrial intermembrane space |
orf19.5734	0.849184	0.274627	1.189	0.308076		1.40017	Putative protein of unknown function; heterozygous null mutant exhibits resistance to parnafungin and cordycepin in the C. albicans fitness test; predicted ORF in Assemblies 19, 20 and 21	GO:0000289 nuclear-transcribed mRNA poly(A) tail shortening | GO:0006368 RNA elongation from RNA polymerase II promoter | GO:0006357 regulation of transcription from RNA polymerase II promoter | GO:0042493 response to drug |	GO:0000175 3'-5'-exoribonuclease activity |	GO:0043332 mating projection tip | GO:0030015 CCR4-NOT core complex | GO:0000932 cytoplasmic mRNA processing body |
orf19.3618	5.62627	0.292849	7.87604	0.401406	YWP1	1.39987	Protein with suggested role in dispersal in host; mutation causes increased adhesion and biofilm formation; putative GPI-anchor; cell wall and secreted; has stable propeptide; regulated by growth phase, phosphate, Ssk1p, Ssn6p, Efg1p, Efh1p	GO:0016337 cell-cell adhesion | GO:0044010 single-species biofilm formation | GO:0044406 adhesion to host | GO:0000128 flocculation |	GO:0030246 carbohydrate binding |	GO:0009986 cell surface | GO:0009277 fungal-type cell wall | GO:0030445 yeast-form cell wall | GO:0005576 extracellular region | GO:0030446 hyphal cell wall |
orf19.639.1	1.13446	0.399794	1.58738	0.180771		1.39924	ORF Predicted by Annotation Working Group	GO:0006412 translation |	GO:0003735 structural constituent of ribosome |	GO:0005762 mitochondrial large ribosomal subunit |
orf19.3954.1	1.007	0.864542	1.40888	0.626878		1.39909	ORF added to Assembly 21 based on comparative genome analysis
orf19.4747	1.01077	0.910644	1.41335	0.159844	HEM14	1.39829	Putative protoporphyrinogen oxidase involved in heme biosynthesis; predicted Kex2p substrate; transcription is regulated by iron; mRNA levels are decreased in a yfh1 null mutant	GO:0006783 heme biosynthetic process |	GO:0004729 oxygen-dependent protoporphyrinogen oxidase activity |	GO:0005743 mitochondrial inner membrane |
orf19.5281	0.905205	0.490915	1.26556	0.0981795		1.39809	Predicted ORF in Assemblies 19, 20 and 21	GO:0006348 chromatin silencing at telomere | GO:0008298 intracellular mRNA localization | GO:0007059 chromosome segregation | GO:0000750 pheromone-dependent signal transduction involved in conjugation with cellular fusion | GO:0042493 response to drug | GO:0030466 chromatin silencing at silent mating-type cassette | GO:0045141 meiotic telomere clustering |	GO:0003723 RNA binding | GO:0001965 G-protein alpha-subunit binding |	GO:0005844 polysome | GO:0005789 endoplasmic reticulum membrane |
orf19.6739	0.843231	0.686022	1.17847	0.703087		1.39756	Predicted ORF in Assemblies 19, 20 and 21		GO:0004614 phosphoglucomutase activity |	GO:0005634 nucleus | GO:0005737 cytoplasm |
orf19.6638	1.0052	0.986383	1.4048	0.031209	PTC4	1.39753	Protein described as a serine/threonine phosphatase, type PP2C; decreased expression in hyphae compared to yeast-form cells		GO:0004722 protein serine/threonine phosphatase activity |	GO:0005737 cytoplasm |
orf19.4246	1.03183	0.939288	1.4418	0.633899		1.39732	Predicted ORF in Assemblies 19, 20 and 21; similar to S. cerevisiae Ykr070wp; transposon mutation affects filamentous growth; Hog1p-downregulated; shows colony morphology-related gene regulation by Ssn6p; induced during cell wall regeneration	GO:0030447 filamentous growth |
orf19.6640	1.0589	0.953395	1.47959	0.552519	TPS1	1.3973	Trehalose-6-phosphate synthase; role in hyphal growth and virulence in mouse systemic infection; upregulated in presence of human neutrophils; macrophage/pseudohyphal-repressed after 16h; detected by mass spec in stationary phase cultures	GO:0005992 trehalose biosynthetic process | GO:0009405 pathogenesis | GO:0030448 hyphal growth | GO:0006950 response to stress | GO:0042493 response to drug |	GO:0003825 alpha,alpha-trehalose-phosphate synthase (UDP-forming) activity |	GO:0005946 alpha,alpha-trehalose-phosphate synthase complex (UDP-forming) |
orf19.3391	0.920387	0.362295	1.28589	0.214881	ADK1	1.39712	Protein described as adenylate kinase; decreased expression in hyphae compared to yeast-form cells; macrophage-induced protein; adenylate kinase release can be used as a marker for cell lysis	GO:0006172 ADP biosynthetic process |	GO:0004017 adenylate kinase activity |	GO:0005758 mitochondrial intermembrane space |
orf19.5515	0.913219	0.347507	1.27563	0.00245544		1.39685	Predicted ORF in Assemblies 19, 20 and 21	GO:0034551 mitochondrial respiratory chain complex III assembly |		GO:0005740 mitochondrial envelope | GO:0005739 mitochondrion | GO:0032592 integral to mitochondrial membrane |
orf19.6358	0.76451	0.57698	1.06788	0.833229		1.39681	Predicted ORF in Assemblies 19, 20 and 21	GO:0006511 ubiquitin-dependent protein catabolic process | GO:0000209 protein polyubiquitination | GO:0006301 postreplication repair |	GO:0004842 ubiquitin-protein ligase activity |	GO:0005634 nucleus | GO:0005737 cytoplasm | GO:0031371 ubiquitin conjugating enzyme complex |
orf19.3064	0.970728	0.885565	1.3559	0.0709948	MRPL27	1.39679	Putative ribosomal protein	GO:0006412 translation |	GO:0003735 structural constituent of ribosome |	GO:0005762 mitochondrial large ribosomal subunit |
orf19.4192.1	0.775169	0.468467	1.08272	0.813439		1.39676	Predicted ORF in Assembly 20 and 21; gene has intron
orf19.806	1.0026	0.997255	1.40026	0.591903	VMA7	1.39663	Putative subunit of the V-ATPase complex, which is involved in control of vacuolar pH; highly similar to S. cerevisiae Vma7p; interacts with phosphatidylinositol 3-kinase Vps34p	GO:0007035 vacuolar acidification | GO:0006875 cellular metal ion homeostasis | GO:0009405 pathogenesis | GO:0030448 hyphal growth |	GO:0046961 proton-transporting ATPase activity, rotational mechanism |	GO:0000329 fungal-type vacuole membrane | GO:0000221 vacuolar proton-transporting V-type ATPase, V1 domain |
orf19.2678	1.27183	0.139823	1.77597	0.0975008	BUB1	1.39639	Predicted ORF in Assemblies 19, 20 and 21; mutation confers increased sensitivity to nocodazole	GO:0007094 mitotic cell cycle spindle assembly checkpoint | GO:0042493 response to drug | GO:0031134 sister chromatid biorientation | GO:0006468 protein amino acid phosphorylation |	GO:0005515 protein binding | GO:0004672 protein kinase activity |	GO:0000778 condensed nuclear chromosome kinetochore |
orf19.7158	0.873	0.262513	1.21828	0.0280893		1.39551	Protein of allantoate permease family; fungal-specific (no human or murine homolog)	GO:0006820 anion transport |	GO:0015296 anion |	GO:0016020 membrane |
orf19.3208	0.770944	0.636343	1.07568	0.915806	DAL52	1.39527	Putative allantoate permease; fungal-specific (no human or murine homolog); not essential for viability; similar to S. cerevisiae Dal5p	GO:0015719 allantoate transport | GO:0006820 anion transport |	GO:0015124 allantoate transmembrane transporter activity | GO:0015296 anion |	GO:0005886 plasma membrane | GO:0016020 membrane |
orf19.7504	1.24465	0.116791	1.73634	0.139887		1.39503	Predicted ORF in Assemblies 19, 20 and 21; Plc1p-regulated; induced in core caspofungin response
orf19.335	0.900773	0.660205	1.25654	0.663743		1.39495	Predicted ORF in Assemblies 19, 20 and 21	GO:0006605 protein targeting | GO:0007059 chromosome segregation |	GO:0030234 enzyme regulator activity |	GO:0005634 nucleus | GO:0005737 cytoplasm |
orf19.1618.1	0.892351	0.57162	1.24468	0.33004		1.39484	ORF added to Assembly 21 based on comparative genome analysis
orf19.295	0.823216	0.625964	1.14746	0.683449		1.39387	Predicted ORF in Assemblies 19, 20 and 21
orf19.775	0.81969	0.521951	1.14201	0.612648		1.39322	Predicted ORF in Assemblies 19, 20 and 21	GO:0006623 protein targeting to vacuole |
orf19.5681	1.04584	0.800368	1.45639	0.164131		1.39256	Predicted ORF in Assemblies 19, 20 and 21
orf19.5069	1.09353	0.664448	1.52279	0.592748		1.39254	Predicted ORF in Assemblies 19, 20 and 21
orf19.6720	1.04345	0.863095	1.45285	0.72782		1.39236	Predicted ORF in Assemblies 19, 20 and 21; similar to S. cerevisiae Ydr090cp; transposon mutation affects filamentous growth	GO:0030447 filamentous growth |
orf19.3342	0.831143	0.533967	1.15696	0.515267		1.39201	Predicted ORF in Assemblies 19, 20 and 21			GO:0005737 cytoplasm |
orf19.4830	0.888897	0.303791	1.23727	0.63201		1.39192	Predicted ORF in Assemblies 19, 20 and 21
orf19.3325	1.27488	0.494553	1.77304	0.308072		1.39075	Protein described as glycogen synthesis initiator; regulated by Efg1p and Efh1p; Hog1p-downregulated; shows colony morphology-related gene regulation by Ssn6p; increased expression in response to prostaglandins
orf19.2670	0.840629	0.434503	1.16885	0.124279		1.39044	Predicted ORF in Assemblies 19, 20 and 21	GO:0006633 fatty acid biosynthetic process |	GO:0019171 3-hydroxyacyl-[acyl-carrier-protein] dehydratase activity |	GO:0005739 mitochondrion |
orf19.281	0.897701	0.202646	1.24791	0.671668		1.39011	Predicted ORF in Assemblies 19, 20 and 21
orf19.6898	1.03716	0.818918	1.44175	0.102019		1.39009	Predicted ORF in Assemblies 19, 20 and 21; increased transcription is observed upon benomyl treatment or in an azole-resistant strain that overexpresses MDR1
orf19.4150	0.847871	0.543359	1.17816	0.653071		1.38955	Predicted ORF in Assemblies 19, 20 and 21; induced by nitric oxide	GO:0034599 cellular response to oxidative stress |	GO:0042803 protein homodimerization activity | GO:0004362 glutathione-disulfide reductase activity |	GO:0005796 Golgi lumen | GO:0000324 fungal-type vacuole | GO:0005801 cis-Golgi network | GO:0016021 integral to membrane |
orf19.6788	0.872407	0.446632	1.212	0.176543		1.38927	Predicted ORF in Assemblies 19, 20 and 21
orf19.4199	1.02113	0.926865	1.41834	0.0824425		1.38899	Predicted ORF in Assemblies 19, 20 and 21	GO:0006888 ER to Golgi vesicle-mediated transport |		GO:0005783 endoplasmic reticulum |
orf19.2233	0.851151	0.754839	1.18179	0.257993	PRE2	1.38846	Protein described as beta-5 subunit of proteasome; macrophage-induced protein	GO:0006511 ubiquitin-dependent protein catabolic process |	GO:0004175 endopeptidase activity |	GO:0019774 proteasome core complex, beta-subunit complex |
orf19.4624	1.11798	0.484403	1.55224	0.491907	HRT2	1.38843	Protein described as having a role in Ty3 transposition; decreased expression in hyphae compared to yeast-form cells; protein detected by mass spec in stationary phase cultures			GO:0005634 nucleus | GO:0005737 cytoplasm |
orf19.5265	0.985311	0.75369	1.36767	0.0235125	KIP4	1.38806	Transposon mutation affects filamentous growth; filament induced; shows Mob2p-dependent hyphal regulation; regulated by Nrg1p, Tup1p	GO:0030447 filamentous growth | GO:0000092 mitotic anaphase B | GO:0007020 microtubule nucleation |	GO:0005200 structural constituent of cytoskeleton | GO:0003777 microtubule motor activity |	GO:0005816 spindle pole body | GO:0005876 spindle microtubule |
orf19.3167	1.35486	0.197071	1.87914	0.410183		1.38696	Predicted ORF in Assemblies 19, 20 and 21	GO:0006784 heme a biosynthetic process |	GO:0008495 protoheme IX farnesyltransferase activity |	GO:0005743 mitochondrial inner membrane | GO:0005739 mitochondrion |
orf19.1567	0.958412	0.877296	1.32908	0.494128		1.38676	Predicted ORF in Assemblies 19, 20 and 21	GO:0042144 vacuole fusion, non-autophagic |		GO:0000324 fungal-type vacuole | GO:0005774 vacuolar membrane |
orf19.3879	0.922987	0.537256	1.27951	0.492036		1.38627	Predicted ORF in Assemblies 19, 20 and 21; possibly spurious ORF (Annotation Working Group prediction); overlaps orf19.3879.1, which is a region annotated as blocked reading frame
orf19.1792	0.945788	0.828504	1.31042	0.00461505		1.38554	Predicted ORF in Assemblies 19, 20 and 21	GO:0000022 mitotic spindle elongation | GO:0007091 mitotic metaphase/anaphase transition | GO:0000070 mitotic sister chromatid segregation | GO:0008054 cyclin catabolic process | GO:0016567 protein ubiquitination | GO:0032297 negative regulation of DNA replication initiation | GO:0000278 mitotic cell cycle | GO:0031145 anaphase-promoting complex-dependent proteasomal ubiquitin-dependent protein c…	GO:0004842 ubiquitin-protein ligase activity | GO:0005515 protein binding |	GO:0005680 anaphase-promoting complex |
orf19.4715	0.969698	0.887404	1.34278	0.44239		1.38475	Predicted ORF in Assemblies 19, 20 and 21	GO:0000001 mitochondrion inheritance | GO:0000266 mitochondrial fission | GO:0000226 microtubule cytoskeleton organization | GO:0030473 nuclear migration along microtubule |	GO:0015631 tubulin binding |	GO:0005934 cellular bud tip | GO:0005739 mitochondrion | GO:0005938 cell cortex |
orf19.48	1.60991	0.595304	2.22881	0.603495		1.38443	Predicted ORF in Assemblies 19, 20 and 21; likely to be essential for growth, based on an insertional mutagenesis strategy; virulence-group-correlated expression	GO:0045324 late endosome to vacuole transport | GO:0001682 tRNA 5'-leader removal | GO:0006412 translation | GO:0007005 mitochondrion organization |	GO:0004526 ribonuclease P activity |	GO:0005624 membrane fraction | GO:0005739 mitochondrion |
orf19.4003	0.865987	0.66153	1.19888	0.569005	TIP20	1.38441	Protein interacting with Sec20p, possibly involved in retrograde transport between the Golgi and the endoplasmic reticulum; similar to S. cerevisiae Tip20p	GO:0006890 retrograde vesicle-mediated transport, Golgi to ER |	GO:0005515 protein binding | GO:0042803 protein homodimerization activity |	GO:0005783 endoplasmic reticulum |
orf19.4102	0.783668	0.599233	1.08459	0.730352	RPN10	1.38399	Predicted ORF in Assemblies 19, 20 and 21; macrophage/pseudohyphal-repressed; regulated by Gcn2p and Gcn4p	GO:0006511 ubiquitin-dependent protein catabolic process |	GO:0004175 endopeptidase activity | GO:0031593 polyubiquitin binding |	GO:0008540 proteasome regulatory particle, base subcomplex |
orf19.6317	0.774197	0.639871	1.06906	0.936591	ADE6	1.38086	Enzyme of adenine biosynthesis; not induced during GCN response, in contrast to the S. cerevisiae ortholog; protein detected by mass spec in stationary phase cultures	GO:0006164 purine nucleotide biosynthetic process |	GO:0004642 phosphoribosylformylglycinamidine synthase activity |	GO:0005737 cytoplasm |
orf19.3973	0.726382	0.755043	1.00291	0.997862		1.3807	Predicted ORF in Assemblies 19, 20 and 21			GO:0005737 cytoplasm |
orf19.3678	1.11016	0.590162	1.53204	0.189727		1.38002	Protein not essential for viability
orf19.5227	1.05775	0.713281	1.45931	0.0176476		1.37964	Predicted ORF in Assemblies 19, 20 and 21	GO:0070481 nuclear-transcribed mRNA catabolic process, non-stop decay | GO:0051131 chaperone-mediated protein complex assembly | GO:0043248 proteasome assembly |		GO:0005622 intracellular |
orf19.6353	0.954648	0.810718	1.31689	0.254975		1.37945	Predicted ORF in Assemblies 19, 20 and 21
orf19.6143	0.940619	0.117418	1.2973	0.316576		1.3792	Predicted ORF in Assemblies 19, 20 and 21
orf19.139	0.891669	0.704666	1.22959	0.0689962	TRA1	1.37898	Subunit of the NuA4 histone acetyltransferase complex	GO:0016573 histone acetylation | GO:0006281 DNA repair | GO:0006357 regulation of transcription from RNA polymerase II promoter |	GO:0004402 histone acetyltransferase activity | GO:0043166 H4/H2 histone acetyltransferase activity |	GO:0035267 NuA4 histone acetyltransferase complex | GO:0046695 SLIK (SAGA-like) complex | GO:0000124 SAGA complex | GO:0070209 ASTRA complex |
orf19.3406	0.963402	0.508303	1.32782	0.181488		1.37826	Predicted ORF in Assemblies 19, 20 and 21; member of conserved Mcm1p regulon	GO:0006821 chloride transport |		GO:0000324 fungal-type vacuole |
orf19.675.1	0.625369	0.000171739	0.86167	0.722361		1.37786	ORF added to Assembly 21 based on comparative genome analysis
orf19.6534	0.981974	0.933446	1.35292	0.521011		1.37775	Predicted ORF in Assemblies 19, 20 and 21
orf19.7181	0.975287	0.933255	1.34327	0.0646823		1.3773	Predicted ORF in Assemblies 19, 20 and 21	GO:0006623 protein targeting to vacuole |		GO:0005737 cytoplasm |
orf19.7438	0.732776	0.397349	1.00887	0.942747	UBA1	1.37678	Protein similar to S. cerevisiae Uba1p, which is a ubiquitin-activating enzyme that is essential for growth; protein level decreased in stationary phase cultures	GO:0016567 protein ubiquitination |	GO:0004839 ubiquitin activating enzyme activity |	GO:0005634 nucleus | GO:0005737 cytoplasm |
orf19.399	0.747196	0.330607	1.02869	0.726434		1.37673	Predicted ORF in Assemblies 19, 20 and 21	GO:0006897 endocytosis | GO:0006468 protein amino acid phosphorylation | GO:0006665 sphingolipid metabolic process |	GO:0004674 protein serine/threonine kinase activity |	GO:0005634 nucleus | GO:0005829 cytosol | GO:0005935 cellular bud neck | GO:0005886 plasma membrane |
orf19.5793	0.702597	0.306502	0.967245	0.892635	PR26	1.37667	Protein with similarity to proteasomal 26S regulatory subunit of S. cerevisiae, H. sapiens, Methanobacterium thermoautotrophicum (Archaebacterium)	GO:0006511 ubiquitin-dependent protein catabolic process |	GO:0004175 endopeptidase activity | GO:0016887 ATPase activity |	GO:0005838 proteasome regulatory particle | GO:0008540 proteasome regulatory particle, base subcomplex |
orf19.7096	0.861647	0.260296	1.18595	0.540497		1.37638	Predicted ORF in Assemblies 19, 20 and 21			GO:0005739 mitochondrion | GO:0000329 fungal-type vacuole membrane |
orf19.458	1.03614	0.962237	1.42591	0.692852		1.37618	Predicted ORF in Assemblies 19, 20 and 21	GO:0007005 mitochondrion organization | GO:0009060 aerobic respiration | GO:0051131 chaperone-mediated protein complex assembly |	GO:0016887 ATPase activity |	GO:0005743 mitochondrial inner membrane |
orf19.5004	0.832184	0.884374	1.14484	0.881335	RAD54	1.37571	Protein similar to S. cerevisiae Rad54p, which is a DNA-dependent ATPase involved in DNA repair; induced under hydroxyurea treatment	GO:0045002 double-strand break repair via single-strand annealing | GO:0000727 double-strand break repair via break-induced replication | GO:0006338 chromatin remodeling | GO:0032079 positive regulation of endodeoxyribonuclease activity | GO:0030491 heteroduplex formation | GO:0032392 DNA geometric change | GO:0000722 telomere maintenance via recombination |	GO:0003916 DNA topoisomerase activity | GO:0015616 DNA translocase activity |	GO:0005634 nucleus |
orf19.5008.1	0.911122	0.177576	1.25203	0.426278		1.37416	ORF Predicted by Annotation Working Group	GO:0031110 regulation of microtubule polymerization or depolymerization | GO:0030472 mitotic spindle organization in nucleus |	GO:0005200 structural constituent of cytoskeleton |	GO:0005819 spindle | GO:0042729 DASH complex |
orf19.7124	0.836459	0.716844	1.14936	0.799142	RVS161	1.37408	Protein required for endocytosis; contains a BAR domain, which is found in proteins involved in membrane curvature; null mutant exhibits defects in hyphal growth, virulence, cell wall integrity, and actin patch localization	GO:0006970 response to osmotic stress | GO:0007121 bipolar cellular bud site selection | GO:0042594 response to starvation | GO:0000747 conjugation with cellular fusion | GO:0031532 actin cytoskeleton reorganization | GO:0009405 pathogenesis | GO:0031505 fungal-type cell wall organization | GO:0030448 hyphal growth | GO:0051666 actin cortical patch localization | GO:0006897 endocytosis |	GO:0008092 cytoskeletal protein binding |	GO:0030479 actin cortical patch | GO:0043332 mating projection tip | GO:0045121 membrane raft |
orf19.1062	0.587426	0.521689	0.807137	0.00391971		1.37402	Predicted ORF in Assemblies 19, 20 and 21
orf19.2791	0.676458	0.581154	0.929159	0.922794		1.37356	Predicted ORF in Assemblies 19, 20 and 21	GO:0030036 actin cytoskeleton organization |	GO:0017024 myosin I binding |	GO:0030479 actin cortical patch |
orf19.4698	0.899653	0.221433	1.23572	0.816667	PTC8	1.37355	Predicted type 2C protein phosphatase, serine/threonine-specific; required for hyphal growth; induced under stress	GO:0030448 hyphal growth | GO:0006470 protein amino acid dephosphorylation |	GO:0004722 protein serine/threonine phosphatase activity |
orf19.5239	0.849172	0.211438	1.16611	0.360393		1.37323	Predicted ORF in Assemblies 19, 20 and 21; oxidative stress-induced via Cap1p			GO:0005737 cytoplasm |
orf19.4088	0.798158	0.190524	1.09456	0.826854		1.37136	Predicted ORF in Assemblies 19, 20 and 21	GO:0019243 methylglyoxal catabolic process to D-lactate | GO:0005975 carbohydrate metabolic process |	GO:0004416 hydroxyacylglutathione hydrolase activity |	GO:0005737 cytoplasm |
orf19.5783	0.882312	0.0618408	1.20986	0.167987		1.37123	Predicted ORF in Assemblies 19, 20 and 21
orf19.3132	0.786928	0.093712	1.07886	0.0932573		1.37097	Predicted ORF in Assemblies 19, 20 and 21; induced by nitric oxide	GO:0006882 cellular zinc ion homeostasis |	GO:0015491 cation |	GO:0005634 nucleus | GO:0016020 membrane | GO:0005783 endoplasmic reticulum |
orf19.5289	1.07918	0.888755	1.47904	0.0283594		1.37053	Predicted ORF in Assemblies 19, 20 and 21
orf19.1363	0.94993	0.206075	1.30093	0.797061		1.3695	Predicted ORF in Assemblies 19, 20 and 21; Plc1p-regulated; transcriptionally activated by Mnl1p under weak acid stress	GO:0030437 ascospore formation | GO:0045944 positive regulation of transcription from RNA polymerase II promoter |
orf19.1462	0.945655	0.815097	1.2948	0.454232	SMP2	1.36921	Transcription is regulated by Nrg1p	GO:0009060 aerobic respiration | GO:0008610 lipid biosynthetic process | GO:0006276 plasmid maintenance |	GO:0008195 phosphatidate phosphatase activity |	GO:0005737 cytoplasm | GO:0005624 membrane fraction |
orf19.4534	0.898138	0.763034	1.22916	0.594097		1.36856	Predicted ORF in Assemblies 19, 20 and 21; macrophage-downregulated gene	GO:0030435 sporulation resulting in formation of a cellular spore | GO:0006511 ubiquitin-dependent protein catabolic process |		GO:0005635 nuclear envelope | GO:0005783 endoplasmic reticulum |
orf19.6670	0.903815	0.524358	1.23642	0.676007	CAC2	1.368	Predicted ORF in Assemblies 19, 20 and 21; macrophage-induced gene	GO:0006281 DNA repair | GO:0006342 chromatin silencing | GO:0006334 nucleosome assembly |	GO:0030528 transcription regulator activity |	GO:0000775 chromosome, centromeric region | GO:0033186 CAF-1 complex |
orf19.2267	0.908787	0.197725	1.24317	0.516675	RFA2	1.36795	Protein described as DNA replication factor A; RNA abundance regulated by cell cycle, tyrosol and cell density	GO:0006301 postreplication repair | GO:0006271 DNA strand elongation during DNA replication | GO:0006289 nucleotide-excision repair | GO:0007131 reciprocal meiotic recombination | GO:0006268 DNA unwinding during replication | GO:0007004 telomere maintenance via telomerase | GO:0016567 protein ubiquitination | GO:0045184 establishment of protein localization | GO:0030491 heteroduplex formation | G…	GO:0043565 sequence-specific DNA binding | GO:0003690 double-stranded DNA binding | GO:0003697 single-stranded DNA binding |	GO:0000781 chromosome, telomeric region | GO:0005662 DNA replication factor A complex | GO:0000794 condensed nuclear chromosome |
orf19.1096	0.971967	0.788541	1.32958	0.304054		1.36793	Predicted ORF in Assemblies 19, 20 and 21	GO:0030003 cellular cation homeostasis |	GO:0005247 voltage-gated chloride channel activity |	GO:0005798 Golgi-associated vesicle |
orf19.3980	0.728028	0.413389	0.995657	0.968957		1.36761	Predicted ORF in Assemblies 19, 20 and 21	GO:0006417 regulation of translation |	GO:0003724 RNA helicase activity |	GO:0005737 cytoplasm |
orf19.3373	0.998612	0.979636	1.36544	0.365853		1.36734	Putative protein of unknown function, transcription is upregulated in clinical isolates from HIV+ patients with oral candidiasis; predicted ORF in Assemblies 19, 20 and 21
orf19.6084	1.0291	0.825	1.40686	0.0386773		1.36707	Predicted ORF in Assemblies 19, 20 and 21
orf19.2959	0.674629	0.626996	0.921756	0.74776		1.36632	Predicted ORF from Assembly 19; removed from Assembly 20; subsequently reinstated in Assembly 21 based on comparative genome analysis
orf19.5572	1.17293	0.669882	1.60236	0.0675251		1.36612	Predicted ORF in Assemblies 19, 20 and 21	GO:0006487 protein amino acid N-linked glycosylation |	GO:0000030 mannosyltransferase activity |	GO:0000136 alpha-1,6-mannosyltransferase complex |
orf19.827	0.872104	0.366882	1.1912	0.243495		1.36589	Predicted ORF in Assemblies 19, 20 and 21; possibly spurious ORF (Annotation Working Group prediction)
orf19.372	0.973195	0.833742	1.32886	0.473477		1.36546	Predicted ORF in Assemblies 19, 20 and 21			GO:0005634 nucleus | GO:0005737 cytoplasm |
orf19.1069	0.749633	0.695161	1.02343	0.984698	RPN4	1.36523	DNA binding protein with Cys2-His2 zinc-finger; putative regulator of proteasome genes; DNA recognition sequence (GAAGGCAAAA) enriched in regions upstream of proteasome genes; induced in core stress response	GO:0006357 regulation of transcription from RNA polymerase II promoter | GO:0043161 proteasomal ubiquitin-dependent protein catabolic process | GO:0000086 G2/M transition of mitotic cell cycle | GO:0045732 positive regulation of protein catabolic process | GO:0045941 positive regulation of transcription | GO:0045739 positive regulation of DNA repair | GO:0046685 response to arsenic |	GO:0003700 transcription factor activity | GO:0043565 sequence-specific DNA binding | GO:0004175 endopeptidase activity | GO:0016563 transcription activator activity |	GO:0005838 proteasome regulatory particle |
orf19.1779	0.735591	0.738254	1.00425	0.971619	MP65	1.36523	Cell surface mannoprotein; mycelial antigen; possible role in cell-wall glucan metabolism; has adhesin motif; O-glycosylation but no predicted N-glycosylation; induced by heat, upon germ tube formation, wall regeneration; diagnostic marker	GO:0006073 cellular glucan metabolic process | GO:0016337 cell-cell adhesion | GO:0044416 induction by symbiont of host defense response | GO:0009405 pathogenesis | GO:0030448 hyphal growth | GO:0007155 cell adhesion | GO:0000747 conjugation with cellular fusion |	GO:0015926 glucosidase activity |	GO:0009986 cell surface | GO:0009277 fungal-type cell wall | GO:0005576 extracellular region | GO:0030445 yeast-form cell wall | GO:0005783 endoplasmic reticulum | GO:0030446 hyphal cell wall |
orf19.4248	0.930765	0.196787	1.27023	0.0128823		1.36472	Predicted ORF in Assemblies 19, 20 and 21; regulated by Gcn4p; repressed in response to amino acid starvation (3-aminotriazole treatment)		GO:0008474 palmitoyl-(protein) hydrolase activity |	GO:0005634 nucleus | GO:0005737 cytoplasm |
orf19.529	0.927053	0.261904	1.26505	0.623114		1.36459	Predicted ORF in Assemblies 19, 20 and 21	GO:0007124 pseudohyphal growth | GO:0001403 invasive growth in response to glucose limitation |		GO:0005886 plasma membrane |
orf19.6411	0.626031	0.478373	0.854214	0.640415		1.36449	Predicted ORF in Assemblies 19, 20 and 21; similar to S. cerevisiae Ylr386wp; transposon mutation affects filamentous growth	GO:0030447 filamentous growth | GO:0006644 phospholipid metabolic process | GO:0000011 vacuole inheritance |	GO:0008047 enzyme activator activity |	GO:0000306 extrinsic to vacuolar membrane | GO:0000329 fungal-type vacuole membrane |
orf19.5079.1	1.00284	0.993421	1.36768	0.339546		1.36381	ORF added to Assembly 21 based on comparative genome analysis
orf19.285	0.571735	0.450605	0.779496	0.469138		1.36339	Predicted ORF in Assemblies 19, 20 and 21			GO:0005634 nucleus | GO:0005737 cytoplasm |
orf19.664	0.573268	0.498878	0.780962	0.435717		1.3623	Predicted ORF in Assemblies 19, 20 and 21
orf19.431	0.931617	0.608908	1.26822	0.032722		1.36131	Putative transcription factor with zinc cluster DNA-binding motif	GO:0006355 regulation of transcription, DNA-dependent |	GO:0003700 transcription factor activity |
orf19.3758	0.984805	0.853378	1.34038	0.671964		1.36106	Predicted ORF in Assemblies 19, 20 and 21			GO:0005774 vacuolar membrane |
orf19.7475	0.757682	0.712706	1.03123	0.948564	PHO81	1.36103	Predicted ORF in Assemblies 19, 20 and 21; possibly adherence-induced	GO:0006796 phosphate metabolic process |	GO:0004861 cyclin-dependent protein kinase inhibitor activity |	GO:0005634 nucleus | GO:0005737 cytoplasm |
orf19.3721	0.910942	0.0866143	1.23958	0.0475795		1.36076	Predicted ORF in Assemblies 19, 20 and 21
orf19.844	0.866232	0.715353	1.17834	0.686001	STE11	1.3603	Predicted ORF in Assemblies 19, 20 and 21; similar to S. cerevisiae Ste11p	GO:0000161 MAPKKK cascade involved in osmosensory signaling pathway | GO:0000750 pheromone-dependent signal transduction involved in conjugation with cellular fusion | GO:0007232 osmosensory signaling pathway via Sho1 osmosensor | GO:0000186 activation of MAPKK activity | GO:0007124 pseudohyphal growth | GO:0001403 invasive growth in response to glucose limitation | GO:0001402 signal transduction…	GO:0004709 MAP kinase kinase kinase activity | GO:0032093 SAM domain binding |	GO:0005737 cytoplasm |
orf19.6515	0.641044	0.0538433	0.871992	0.220147	HSP90	1.36027	Essential chaperone of Hsp90 family, activated by heat shock and stress; regulates several signal transduction pathways; localizes to surface of hyphae, but not yeast-form cells; mediates echinocandin resistance	GO:0009408 response to heat | GO:0019236 response to pheromone | GO:0030518 steroid hormone receptor signaling pathway | GO:0006457 protein folding | GO:0042026 protein refolding | GO:0042493 response to drug | GO:0043248 proteasome assembly | GO:0000723 telomere maintenance | GO:0009405 pathogenesis | GO:0030447 filamentous growth |	GO:0051082 unfolded protein binding | GO:0042623 ATPase activity, coupled | GO:0019829 cation-transporting ATPase activity |	GO:0009986 cell surface | GO:0009277 fungal-type cell wall | GO:0005737 cytoplasm | GO:0030446 hyphal cell wall | GO:0005624 membrane fraction | GO:0001950 plasma membrane enriched fraction | GO:0005739 mitochondrion | GO:0005886 plasma membrane |
orf19.2940	0.938134	0.734646	1.27567	0.0755401		1.35979	Predicted ORF in Assemblies 19, 20 and 21	GO:0006888 ER to Golgi vesicle-mediated transport |		GO:0005789 endoplasmic reticulum membrane |
orf19.6465	0.761525	0.388697	1.03534	0.631947		1.35957	Predicted ORF in Assemblies 19, 20 and 21	GO:0007124 pseudohyphal growth | GO:0001403 invasive growth in response to glucose limitation |		GO:0005886 plasma membrane |
orf19.5182	0.846647	0.541573	1.15106	0.845246	POL3	1.35955	Large subunit of DNA polymerase III; partially complements defects of an S. cerevisiae cdc2 mutant; differing reports about periodic (G1/S) or non-periodic mRNA expression through cell cycle	GO:0006298 mismatch repair | GO:0006272 leading strand elongation | GO:0006284 base-excision repair | GO:0043137 DNA replication, removal of RNA primer | GO:0045005 maintenance of fidelity during DNA-dependent DNA replication | GO:0006278 RNA-dependent DNA replication |	GO:0003887 DNA-directed DNA polymerase activity |	GO:0043625 delta DNA polymerase complex | GO:0005657 replication fork |
orf19.7512	0.882715	0.545062	1.19993	0.0204332		1.35937	Predicted ORF in Assemblies 19, 20 and 21	GO:0030476 ascospore wall assembly |	GO:0003824 catalytic activity | GO:0019825 oxygen binding |
orf19.485	1.16415	0.304513	1.58215	0.622057		1.35906	Predicted ORF in Assemblies 19, 20 and 21	GO:0043161 proteasomal ubiquitin-dependent protein catabolic process | GO:0007020 microtubule nucleation | GO:0007103 spindle pole body duplication in nuclear envelope |	GO:0005200 structural constituent of cytoskeleton |	GO:0005643 nuclear pore | GO:0070390 transcription export complex 2 | GO:0000111 nucleotide-excision repair factor 2 complex | GO:0005825 half bridge of spindle pole body |
orf19.3054	0.671551	0.419073	0.912358	0.491215	RPN3	1.35858	Predicted ORF in Assemblies 19, 20 and 21; amphotericin B repressed; oxidative stress-induced via Cap1p	GO:0006511 ubiquitin-dependent protein catabolic process |	GO:0004175 endopeptidase activity |	GO:0008541 proteasome regulatory particle, lid subcomplex |
orf19.5701	1.03718	0.56105	1.40865	0.200776		1.35815	Predicted ORF in Assemblies 19, 20 and 21	GO:0007059 chromosome segregation | GO:0045324 late endosome to vacuole transport |	GO:0005515 protein binding |	GO:0000776 kinetochore | GO:0005624 membrane fraction |
orf19.866	1.2099	0.0512163	1.64299	0.126601	RAD32	1.35795	Protein similar to S. cerevisiae protein with role in nucleotide excision repair; down-regulation associated with azole resistance	GO:0019985 bypass DNA synthesis | GO:0006260 DNA replication |	GO:0003887 DNA-directed DNA polymerase activity |	GO:0005657 replication fork |
orf19.2734	0.990384	0.928086	1.34448	0.228043		1.35753	Protein not essential for viability
orf19.3123	0.777403	0.563853	1.05525	0.533558	RPT5	1.3574	Predicted ORF in Assemblies 19, 20 and 21; transcription is regulated by Nrg1p and Mig1p; regulated by Gcn2p and Gcn4p; protein level decreased in stationary phase cultures	GO:0006511 ubiquitin-dependent protein catabolic process |	GO:0004175 endopeptidase activity | GO:0016887 ATPase activity |	GO:0008540 proteasome regulatory particle, base subcomplex |
orf19.6327	0.855136	0.671409	1.16059	0.711436	HET1	1.3572	Putative sphingomyelin transfer protein
orf19.5671	1.07826	0.495185	1.46324	0.431237		1.35703	Predicted ORF in Assemblies 19, 20 and 21	GO:0032185 septin cytoskeleton organization |		GO:0043332 mating projection tip | GO:0005934 cellular bud tip | GO:0001400 mating projection base | GO:0005935 cellular bud neck |
orf19.149	0.749512	0.851039	1.01707	0.98988		1.35697	Predicted ORF in Assemblies 19, 20 and 21
orf19.491	1.07865	0.861241	1.46316	0.145892		1.35647	Predicted ORF in Assemblies 19, 20 and 21	GO:0006616 SRP-dependent cotranslational protein targeting to membrane, translocation | GO:0006615 SRP-dependent cotranslational protein targeting to membrane, docking | GO:0006614 SRP-dependent cotranslational protein targeting to membrane | GO:0031204 posttranslational protein targeting to membrane, translocation | GO:0046967 cytosol to ER transport |	GO:0005047 signal recognition particle binding | GO:0008565 protein transporter activity |	GO:0005785 signal recognition particle receptor complex | GO:0031207 Sec62/Sec63 complex | GO:0005739 mitochondrion | GO:0005886 plasma membrane |
orf19.3329	0.802297	0.366558	1.08826	0.669205		1.35643	Predicted ORF in Assemblies 19, 20 and 21	GO:0030148 sphingolipid biosynthetic process | GO:0019722 calcium-mediated signaling |	GO:0042392 sphingosine-1-phosphate phosphatase activity |	GO:0005783 endoplasmic reticulum |
orf19.2663	0.806165	0.617263	1.09322	0.800957		1.35607	Predicted ORF in Assemblies 19, 20 and 21
orf19.1589	0.965105	0.620019	1.30832	0.0194398		1.35562	Putative DNA-binding transcription factor	GO:0006360 transcription from RNA polymerase I promoter | GO:0006355 regulation of transcription, DNA-dependent |	GO:0003701 RNA polymerase I transcription factor activity | GO:0003700 transcription factor activity |	GO:0000120 RNA polymerase I transcription factor complex |
orf19.1185	0.774593	0.483136	1.04996	0.908792		1.3555	Predicted ORF in Assemblies 19, 20 and 21	GO:0000921 septin ring assembly | GO:0051865 protein autoubiquitination | GO:0000132 establishment of mitotic spindle orientation | GO:0007094 mitotic cell cycle spindle assembly checkpoint |	GO:0004842 ubiquitin-protein ligase activity |	GO:0005737 cytoplasm |
orf19.3797	1.31023	0.18988	1.7755	0.0164341		1.3551	Predicted ORF in Assemblies 19, 20 and 21		GO:0003735 structural constituent of ribosome |	GO:0005762 mitochondrial large ribosomal subunit |
orf19.2644	0.993881	0.947356	1.34641	0.304321	QCR2	1.3547	Protein described as ubiquinol-cytochrome-c reductase; antigenic in human; transcriptionally induced by interaction with macrophage; repressed by nitric oxide; in detergent-resistant membrane fraction (possible lipid raft component)	GO:0006122 mitochondrial electron transport, ubiquinol to cytochrome c | GO:0009060 aerobic respiration |	GO:0008121 ubiquinol-cytochrome-c reductase activity |	GO:0005624 membrane fraction | GO:0005750 mitochondrial respiratory chain complex III | GO:0005886 plasma membrane |
orf19.3401	0.784756	0.63853	1.06232	0.856575	CTA1	1.35369	Protein similar to S. cerevisiae Mos10p, which affects S. cerevisiae filamentous growth; activates transcription in 1-hybrid assay in S. cerevisiae; protein levels increase under weak acid stress; nonessential	GO:0042493 response to drug | GO:0045324 late endosome to vacuole transport | GO:0030447 filamentous growth |	GO:0016563 transcription activator activity |	GO:0000329 fungal-type vacuole membrane |
orf19.6021	0.641817	0.449886	0.868708	0.855186	IHD2	1.35351	Transcriptionally regulated by iron and by yeast-hyphal switching; expression greater in low iron
orf19.3367	1.03525	0.727619	1.4008	0.0451652		1.3531	Predicted ORF in Assemblies 19, 20 and 21		GO:0003735 structural constituent of ribosome |	GO:0005762 mitochondrial large ribosomal subunit |
orf19.5015	0.820197	0.820486	1.10948	0.771715	MYO2	1.3527	Class V myosin; nonessential; required for wild-type actin cytoskeletal polarity, nuclear organization and migration, and hyphal growth; sole class V myosin in C. albicans; conserved myosin ATPase and tail domains	GO:0040023 establishment of nucleus localization | GO:0006997 nucleus organization | GO:0030448 hyphal growth | GO:0007163 establishment or maintenance of cell polarity | GO:0030036 actin cytoskeleton organization | GO:0006897 endocytosis | GO:0030050 vesicle transport along actin filament | GO:0007118 budding cell apical bud growth | GO:0000001 mitochondrion inheritance | GO:0045033 peroxisome i…	GO:0003774 motor activity | GO:0000146 microfilament motor activity | GO:0051015 actin filament binding | GO:0005516 calmodulin binding |	GO:0016461 unconventional myosin complex | GO:0030478 actin cap | GO:0043332 mating projection tip | GO:0005934 cellular bud tip | GO:0031982 vesicle | GO:0031941 filamentous actin | GO:0000329 fungal-type vacuole membrane | GO:0032432 actin filament bundle | GO:0005935 cellular bud neck | GO:0000131 incipient cellular bud site |
orf19.5124	0.76794	0.258336	1.03839	0.652993	RBR3	1.35217	Cell wall protein; expression is repressed by Rim101p
orf19.1622	0.941766	0.560825	1.27283	0.173921	YCG1	1.35153	Predicted ORF in Assemblies 19, 20 and 21
orf19.4299	1.01118	0.931292	1.36637	0.171508	MSW1	1.35126	Protein likely to be essential for growth, based on an insertional mutagenesis strategy; similar to S. cerevisiae Msw1p, which is mitochondrial tryptophanyl-tRNA synthetase	GO:0070183 mitochondrial tryptophanyl-tRNA aminoacylation |	GO:0004830 tryptophan-tRNA ligase activity |	GO:0005739 mitochondrion |
orf19.1190	0.926324	0.871081	1.25169	0.345624		1.35125	Predicted ORF in Assemblies 19, 20 and 21	GO:0007035 vacuolar acidification | GO:0006797 polyphosphate metabolic process |	GO:0046961 proton-transporting ATPase activity, rotational mechanism |	GO:0000220 vacuolar proton-transporting V-type ATPase, V0 domain |
orf19.7222	0.829284	0.664246	1.12028	0.543012	PAM16	1.3509	Protein described as similar to maltase; regulated by Gcn4p; repressed in response to amino acid starvation (3-aminotriazole treatment); transcription is upregulated in both intermediate and mature biofilms	GO:0030150 protein import into mitochondrial matrix |	GO:0004857 enzyme inhibitor activity | GO:0008565 protein transporter activity | GO:0005515 protein binding |	GO:0005739 mitochondrion | GO:0001405 presequence translocase-associated import motor |
orf19.5729	1.07786	0.647916	1.45486	0.201187	FGR17	1.34977	Putative DNA-binding transcription factor; has zinc cluster DNA-binding motif; lacks an ortholog in S. cerevisiae; transposon mutation affects filamentous growth	GO:0030447 filamentous growth | GO:0009063 cellular amino acid catabolic process | GO:0006355 regulation of transcription, DNA-dependent |	GO:0003700 transcription factor activity |	GO:0005634 nucleus |
orf19.349	0.798432	0.0996633	1.07766	0.16626		1.34973	Predicted ORF in Assemblies 19, 20 and 21	GO:0016071 mRNA metabolic process | GO:0009060 aerobic respiration |
orf19.7494	0.964051	0.205897	1.30089	0.313606		1.3494	Predicted ORF in Assemblies 19, 20 and 21; cell-cycle regulated periodic mRNA expression	GO:0006302 double-strand break repair |
orf19.2958	0.880447	0.38357	1.18807	0.344618		1.34939	Predicted ORF in Assemblies 19, 20 and 21
orf19.904	0.969854	0.460055	1.30857	0.48513		1.34925	Predicted ORF in Assemblies 19, 20 and 21; possibly spurious ORF (Annotation Working Group prediction)
orf19.5667	0.704145	0.62095	0.950011	0.955569	MNR2	1.34917	Putative ion transporter; fungal-specific (no human or murine homolog)	GO:0015693 magnesium ion transport |	GO:0015095 magnesium ion transmembrane transporter activity |	GO:0016020 membrane |
orf19.3659	0.963544	0.469751	1.29948	0.600409		1.34865	Predicted ORF in Assemblies 19, 20 and 21	GO:0006366 transcription from RNA polymerase II promoter |		GO:0005634 nucleus | GO:0005737 cytoplasm |
orf19.7436	0.996899	0.994754	1.34393	0.706983	AAF1	1.34811	Possible regulatory protein; Glu-rich domain; production in S. cerevisiae increases endothelial cell adherence and flocculence; expressed under diverse conditions, detected in yeast-form and hyphal cells; alkaline or caspofungin upregulated	GO:0044406 adhesion to host | GO:0016337 cell-cell adhesion | GO:0006355 regulation of transcription, DNA-dependent | GO:0007155 cell adhesion |		GO:0005634 nucleus | GO:0005737 cytoplasm |
orf19.5030	0.868567	0.476636	1.16983	0.793343		1.34685	Predicted ORF in Assemblies 19, 20 and 21; induced during planktonic growth			GO:0005737 cytoplasm |
orf19.4577.3	0.771363	0.0248783	1.03854	0.921756		1.34637	ORF Predicted by Annotation Working Group	GO:0045039 protein import into mitochondrial inner membrane |	GO:0008565 protein transporter activity | GO:0051082 unfolded protein binding |	GO:0042719 mitochondrial intermembrane space protein transporter complex |
orf19.3421.1	0.796673	0.483557	1.07242	0.863395		1.34612	ORF Predicted by Annotation Working Group	GO:0006366 transcription from RNA polymerase II promoter |	GO:0016455 RNA polymerase II transcription mediator activity |
orf19.1421	0.724729	0.591139	0.97506	0.9423		1.34541	Predicted ORF in Assemblies 19, 20 and 21	GO:0000256 allantoin catabolic process |	GO:0004848 ureidoglycolate hydrolase activity |	GO:0016020 membrane |
orf19.7632	0.990153	0.961043	1.33198	0.494216		1.34523	Predicted ORF in Assemblies 19, 20 and 21
orf19.504	0.632617	0.0360324	0.850962	0.522888		1.34515	Predicted ORF in Assemblies 19, 20 and 21	GO:0006623 protein targeting to vacuole | GO:0006338 chromatin remodeling |	GO:0043140 ATP-dependent 3'-5' DNA helicase activity |	GO:0031011 Ino80 complex |
orf19.6047	1.25865	0.650788	1.69251	0.584788	TUF1	1.3447	Putative translation elongation factor; macrophage/pseudohyphal-induced; genes encoding ribosomal subunits, translation factors, and tRNA synthetases are downregulated upon phagocytosis by murine macrophage	GO:0032543 mitochondrial translation |	GO:0003924 GTPase activity | GO:0003746 translation elongation factor activity |	GO:0005761 mitochondrial ribosome | GO:0005739 mitochondrion |
orf19.3479	0.939218	0.767806	1.26279	0.633342		1.34451	Predicted ORF in Assemblies 19, 20 and 21
orf19.2949	1.25401	0.0398911	1.68567	0.128262		1.34422	Predicted ORF in Assemblies 19, 20 and 21			GO:0000329 fungal-type vacuole membrane |
orf19.5342	0.492297	0.394081	0.661698	0.121921		1.3441	Predicted ORF in Assemblies 19, 20 and 21; fungal-specific (no human or murine homolog)			GO:0000324 fungal-type vacuole | GO:0005625 soluble fraction |
orf19.4136	0.940684	0.121549	1.26415	0.29681	YBL053	1.34387	Predicted ORF in Assemblies 19, 20 and 21; not essential for viability	GO:0048478 replication fork protection | GO:0043111 replication fork arrest | GO:0007064 mitotic sister chromatid cohesion | GO:0000076 DNA replication checkpoint |		GO:0000228 nuclear chromosome |
orf19.7323	0.883999	0.530775	1.18794	0.0414479	CBP1	1.34383	Corticosteroid binding protein; transcription induced at late log-phase or upon adherence to polystyrene; not induced by corticosterone; contains a possible NAD/FAD binding region; regulated by Nrg1p, Tup1p	GO:0015940 pantothenate biosynthetic process |	GO:0005496 steroid binding |	GO:0005737 cytoplasm |
orf19.5006.1	0.736649	0.645012	0.989335	0.946075		1.34302	ORF Predicted by Annotation Working Group	GO:0006906 vesicle fusion | GO:0006897 endocytosis | GO:0006893 Golgi to plasma membrane transport |	GO:0005484 SNAP receptor activity |	GO:0030133 transport vesicle | GO:0005802 trans-Golgi network | GO:0005768 endosome |
orf19.6435	0.653947	0.389631	0.878264	0.678787		1.34302	Predicted ORF in Assemblies 19, 20 and 21			GO:0005739 mitochondrion | GO:0005886 plasma membrane |
orf19.5209	0.785929	0.553449	1.05508	0.901064		1.34246	Predicted ORF in Assemblies 19, 20 and 21	GO:0006891 intra-Golgi vesicle-mediated transport |		GO:0017119 Golgi transport complex |
orf19.4413	0.842738	0.56011	1.13088	0.612917	CMD1	1.34191	Calmodulin; calmodulin inhibitors cause a defect in hyphal growth; not transcriptionally regulated by yeast-hyphal transition; mutation confers hypersensitivity to cytochalasin D and high concentrations of tunicamycin; gene has intron	GO:0007242 intracellular signaling cascade | GO:0005513 detection of calcium ion | GO:0006644 phospholipid metabolic process | GO:0030448 hyphal growth | GO:0007067 mitosis | GO:0042493 response to drug | GO:0006607 NLS-bearing substrate import into nucleus | GO:0016237 microautophagy | GO:0000742 karyogamy during conjugation with cellular fusion | GO:0042144 vacuole fusion, non-autophagic | GO:0…	GO:0005509 calcium ion binding | GO:0048306 calcium-dependent protein binding |	GO:0043332 mating projection tip | GO:0005934 cellular bud tip | GO:0005823 central plaque of spindle pole body | GO:0005935 cellular bud neck | GO:0000131 incipient cellular bud site |
orf19.5589	0.909631	0.859204	1.22016	0.736199		1.34138	Predicted ORF in Assemblies 19, 20 and 21
orf19.1390	1.159	0.524144	1.55405	0.354354	PMI1	1.34086	Phosphomannose isomerase; cell wall biosynthesis enzyme; drug target; functional homolog of S. cerevisiae and E. coli phosphomannose isomerase; Gcn4p-regulated; repressed by 3-AT; induced on adherence to polystyrene, phagocytosis	GO:0031505 fungal-type cell wall organization | GO:0009272 fungal-type cell wall biogenesis | GO:0006486 protein amino acid glycosylation | GO:0000032 cell wall mannoprotein biosynthetic process | GO:0009298 GDP-mannose biosynthetic process |	GO:0004476 mannose-6-phosphate isomerase activity |	GO:0005634 nucleus | GO:0005737 cytoplasm |
orf19.2214	1.0553	0.868089	1.41465	0.456822		1.34052	Predicted ORF in Assemblies 19, 20 and 21		GO:0003735 structural constituent of ribosome |	GO:0005762 mitochondrial large ribosomal subunit |
orf19.5775	0.905052	0.371594	1.21289	0.659983		1.34013	Predicted ORF in Assemblies 19, 20 and 21; member of a family encoded by FGR6-related genes in the RB2 repeat sequence
orf19.6114	0.970542	0.962629	1.30062	0.554429		1.3401	Predicted ORF in Assemblies 19, 20 and 21
orf19.6731	0.992866	0.926257	1.33049	0.0491557		1.34005	Predicted ORF in Assemblies 19, 20 and 21; transcription is repressed in response to alpha pheromone in SpiderM medium
orf19.1770	1.1502	0.88655	1.54112	0.767579	CYC1	1.33987	Cytochrome c; complements defects of an S. cerevisiae cyc1 cyc7 double mutant; transcriptionally regulated by iron; expression greater in high iron; alkaline downregulated; repressed by nitric oxide	GO:0006122 mitochondrial electron transport, ubiquinol to cytochrome c | GO:0006123 mitochondrial electron transport, cytochrome c to oxygen |	GO:0009055 electron carrier activity |	GO:0005739 mitochondrion | GO:0005758 mitochondrial intermembrane space |
orf19.1011	0.939464	0.8201	1.25783	0.664827		1.33888	Predicted ORF in Assemblies 19, 20 and 21	GO:0006486 protein amino acid glycosylation |	GO:0000026 alpha-1,2-mannosyltransferase activity |	GO:0005794 Golgi apparatus |
orf19.3154	0.961631	0.521771	1.28703	0.0525009		1.33838	Predicted ORF in Assemblies 19, 20 and 21			GO:0005739 mitochondrion |
orf19.6595	0.958556	0.768426	1.28286	0.239336	RTA4	1.33833	Predicted ORF in Assemblies 19, 20 and 21; similar to S. cerevisiae Yor049cp, which is involved in fatty acid transport; transposon mutation affects filamentous growth; alkaline downregulated; caspofungin induced	GO:0030447 filamentous growth | GO:0015908 fatty acid transport |	GO:0004012 phospholipid-translocating ATPase activity |	GO:0005886 plasma membrane | GO:0016021 integral to membrane | GO:0005783 endoplasmic reticulum |
orf19.6790	0.822188	0.587253	1.09969	0.612716		1.33751	Predicted ORF in Assemblies 19, 20 and 21	GO:0040009 regulation of growth rate | GO:0048026 positive regulation of nuclear mRNA splicing, via spliceosome | GO:0006376 mRNA splice site selection |	GO:0003729 mRNA binding |	GO:0000243 commitment complex | GO:0005685 U1 snRNP |
orf19.7064	1.01	0.992762	1.35077	0.662267	GLN4	1.3374	Putative tRNA-Gln synthetase; genes encoding ribosomal subunits, translation factors, and tRNA synthetases are downregulated upon phagocytosis by murine macrophage	GO:0006425 glutaminyl-tRNA aminoacylation |	GO:0004819 glutamine-tRNA ligase activity |
orf19.5007	0.749961	0.178307	1.00282	0.959833	ACT1	1.33716	Actin; gene has intron; transcriptionally regulated by growth phase and by starvation; localizes to polarized growth site in budding and hyphal cells; required for wild-type Cdc42p localization; unprocessed N terminus	GO:0001766 membrane raft polarization | GO:0016573 histone acetylation | GO:0030476 ascospore wall assembly | GO:0006281 DNA repair | GO:0001300 chronological cell aging | GO:0006979 response to oxidative stress | GO:0006897 endocytosis | GO:0000916 contractile ring contraction involved in cytokinesis during cell cycle | GO:0000011 vacuole inheritance | GO:0006357 regulation of transcription from…	GO:0005200 structural constituent of cytoskeleton | GO:0004402 histone acetyltransferase activity | GO:0043166 H4/H2 histone acetyltransferase activity |	GO:0015629 actin cytoskeleton | GO:0001411 hyphal tip | GO:0030864 cortical actin cytoskeleton | GO:0005933 cellular bud | GO:0000142 cellular bud neck contractile ring | GO:0005884 actin filament | GO:0030479 actin cortical patch | GO:0035267 NuA4 histone acetyltransferase complex | GO:0031011 Ino80 complex | GO:0000812 Swr1 complex |
orf19.727	1.04973	0.298296	1.40349	0.671944		1.337	Predicted ORF in Assemblies 19, 20 and 21; member of a family encoded by FGR6-related genes in the RB2 repeat sequence; possibly spurious ORF (Annotation Working Group prediction)
orf19.1944	0.924192	0.915584	1.23551	0.553567	GPR1	1.33686	Putative G-protein-coupled receptor of plasma membrane; required for wild-type hyphal growth; acts in cAMP-PKA pathway; reports differ on role in cAMP-mediated glucose signaling; Gpr1p C terminus binds Gpa2p; regulates HWP1 and ECE1	GO:0009749 response to glucose stimulus | GO:0030448 hyphal growth | GO:0007186 G-protein coupled receptor protein signaling pathway | GO:0001402 signal transduction during filamentous growth | GO:0030447 filamentous growth |	GO:0004930 G-protein coupled receptor activity |	GO:0016021 integral to membrane | GO:0005886 plasma membrane |
orf19.6406	1.11277	0.721458	1.48761	0.12274		1.33685	Predicted ORF in Assemblies 19, 20 and 21	GO:0042173 regulation of sporulation resulting in formation of a cellular spore |		GO:0005737 cytoplasm |
orf19.1272	0.862958	0.464427	1.15341	0.281147		1.33658	Predicted ORF in Assemblies 19, 20 and 21	GO:0008361 regulation of cell size |		GO:0005634 nucleus | GO:0005737 cytoplasm |
orf19.4147	0.773299	0.0767958	1.03335	0.839891	GLR1	1.33628	Glutathione reductase; transcriptionally regulated by Cap1p; upregulated in the presence of human neutrophils; oxidative stress-induced via Cap1p; overexpression correlates with multidrug resistance in a cap1 mutant, farnesol induced	GO:0006979 response to oxidative stress |	GO:0004362 glutathione-disulfide reductase activity |	GO:0005739 mitochondrion | GO:0005634 nucleus |
orf19.2417	0.970178	0.910065	1.29585	0.692202	SMC5	1.33568	Predicted ORF in Assemblies 19, 20 and 21; similar to S. cerevisiae Yol034wp, which is involved in DNA repair; transposon mutation affects filamentous growth	GO:0030447 filamentous growth | GO:0008283 cell proliferation | GO:0006281 DNA repair |		GO:0030915 Smc5-Smc6 complex | GO:0005634 nucleus |
orf19.7379	0.85069	0.575965	1.13603	0.544534	FAA2	1.33542	Predicted acyl CoA synthetase; expression is regulated upon white-opaque switching; transcription is upregulated in both intermediate and mature biofilms	GO:0006629 lipid metabolic process | GO:0006499 N-terminal protein myristoylation |	GO:0004467 long-chain-fatty-acid-CoA ligase activity |	GO:0005777 peroxisome |
orf19.6140	0.581909	0.548333	0.776895	0.749454	FRE30	1.33508	Protein with similarity to ferric reductases; downregulated in response to amphotericin B, estradiol, or ciclopirox olamine, and upregulated by interaction with macrophage; un-merged from orf19.6139 in a revision of Assembly 21
orf19.4230	0.764042	0.651396	1.01988	0.895767		1.33485	Predicted ORF in Assemblies 19, 20 and 21; protein detected by mass spec in exponential and stationary phase cultures	GO:0006511 ubiquitin-dependent protein catabolic process | GO:0043248 proteasome assembly |	GO:0004175 endopeptidase activity |	GO:0019774 proteasome core complex, beta-subunit complex | GO:0034515 proteasome storage granule |
orf19.649	0.90657	0.570737	1.21009	0.0658963		1.3348	Predicted ORF in Assemblies 19, 20 and 21
orf19.6527	0.758083	0.455265	1.01188	0.833139		1.33479	Predicted ORF in Assemblies 19, 20 and 21; shows colony morphology-related gene regulation by Ssn6p; transcriptionally activated by Mnl1p under weak acid stress	GO:0000747 conjugation with cellular fusion |		GO:0016021 integral to membrane |
orf19.5133	0.955111	0.663407	1.27445	0.847504		1.33434	Predicted zinc-finger protein of unknown function	GO:0006357 regulation of transcription from RNA polymerase II promoter |	GO:0003704 specific RNA polymerase II transcription factor activity |	GO:0005634 nucleus |
orf19.1883	1.06904	0.721145	1.42598	0.55928	YCS4	1.33389	Predicted ORF in Assemblies 19, 20 and 21; cell-cycle regulated periodic mRNA expression	GO:0007076 mitotic chromosome condensation | GO:0043007 maintenance of rDNA | GO:0070058 tRNA gene clustering | GO:0030466 chromatin silencing at silent mating-type cassette | GO:0010032 meiotic chromosome condensation |		GO:0000799 nuclear condensin complex | GO:0005730 nucleolus |
orf19.4084	0.831696	0.451965	1.10914	0.836517	KIS1	1.33358	Scaffold protein of Snf1p complex; similar to S. cerevisiae Gal83p and Sip2p, with regions of similarity to Sip1p (ASC and KIS domain); interacts with Snf4p	GO:0007165 signal transduction | GO:0006109 regulation of carbohydrate metabolic process | GO:0006468 protein amino acid phosphorylation | GO:0007155 cell adhesion | GO:0043254 regulation of protein complex assembly | GO:0001403 invasive growth in response to glucose limitation |	GO:0004679 AMP-activated protein kinase activity | GO:0030159 receptor signaling complex scaffold activity |	GO:0005641 nuclear envelope lumen | GO:0005737 cytoplasm | GO:0031588 AMP-activated protein kinase complex |
orf19.707	0.702564	0.511884	0.936925	0.572047	APG7	1.33358	Protein not essential for viability; similar to S. cerevisiae Atg7p, which is an E1 protein conjugation enzyme involved in protein-vacuolar targeting and autophagy	GO:0032446 protein modification by small protein conjugation | GO:0006501 C-terminal protein lipidation | GO:0034727 piecemeal microautophagy of nucleus | GO:0032258 CVT pathway | GO:0016236 macroautophagy |	GO:0019779 APG8 activating enzyme activity | GO:0019778 APG12 activating enzyme activity |	GO:0016020 membrane | GO:0005829 cytosol | GO:0005739 mitochondrion | GO:0000407 pre-autophagosomal structure |
orf19.3590	0.796048	0.457637	1.0612	0.677942	IPP1	1.33308	Protein described as inorganic pyrophosphatase; antigenic in human, mouse; soluble protein in hyphae; macrophage-induced protein; protein detected by mass spec in exponential and stationary phase cultures		GO:0042803 protein homodimerization activity | GO:0004427 inorganic diphosphatase activity |	GO:0030446 hyphal cell wall | GO:0005625 soluble fraction |
orf19.1632	0.729671	0.0559344	0.972646	0.518812		1.33299	Predicted ORF in Assemblies 19, 20 and 21
orf19.1238	0.972333	0.741306	1.29573	0.408563	TUB4	1.33259	Putative gamma-tubulin; induced upon adherence to polystyrene; transcription is regulated by Nrg1p and Mig1p; periodic mRNA expression, peak at cell-cycle S/G2 phase	GO:0007020 microtubule nucleation | GO:0030472 mitotic spindle organization in nucleus |	GO:0005200 structural constituent of cytoskeleton |	GO:0000928 gamma-tubulin small complex, spindle pole body | GO:0005824 outer plaque of spindle pole body | GO:0005822 inner plaque of spindle pole body |
orf19.5642	0.818549	0.868352	1.09072	0.943874		1.3325	Predicted ORF in Assemblies 19, 20 and 21; shows colony morphology-related gene regulation by Ssn6p; greater mRNA abundance observed in a cyr1 homozygous null mutant than in wild type			GO:0005737 cytoplasm |
orf19.837	0.964547	0.867048	1.28484	0.698534	GNA1	1.33207	Glucosamine-6-phosphate acetyltransferase; enzyme of UDP-GlcNAc biosynthesis; required for viability in absence of GlcNAc supplementation; required for persistent infection and wild-type virulence in mouse systemic infection	GO:0006048 UDP-N-acetylglucosamine biosynthetic process | GO:0009405 pathogenesis |	GO:0004343 glucosamine 6-phosphate N-acetyltransferase activity |	GO:0005634 nucleus | GO:0005737 cytoplasm |
orf19.5442	0.851971	0.36319	1.13457	0.729784		1.3317	Predicted ORF in Assemblies 19, 20 and 21
orf19.2520	1.14122	0.047569	1.51966	0.04893		1.3316	Predicted ORF in Assemblies 19, 20 and 21	GO:0000028 ribosomal small subunit assembly |	GO:0003723 RNA binding | GO:0003735 structural constituent of ribosome |	GO:0005763 mitochondrial small ribosomal subunit |
orf19.5095	0.810593	0.311177	1.07934	0.0889222		1.33155	Predicted ORF in Assemblies 19, 20 and 21; caspofungin induced	GO:0006694 steroid biosynthetic process | GO:0006897 endocytosis | GO:0006887 exocytosis | GO:0015918 sterol transport | GO:0030011 maintenance of cell polarity |	GO:0008142 oxysterol binding | GO:0005498 sterol carrier activity |	GO:0005783 endoplasmic reticulum | GO:0005935 cellular bud neck | GO:0005886 plasma membrane |
orf19.1831	0.761658	0.0277553	1.01402	0.972549		1.33133	Predicted ORF in Assemblies 19, 20 and 21
orf19.7277	0.611209	0.173722	0.813638	0.448004		1.3312	Predicted ORF in retrotransposon Zorro2 with similarity to zinc finger-containing retroviral nucleocapsid proteins; un-merged from orf19.7275 in a revision of Assembly 21 based on comparative genome analysis and new sequence data
orf19.133	0.844595	0.589468	1.12395	0.604123		1.33076	Predicted ORF in Assemblies 19, 20 and 21; induced by nitric oxide in yhb1 mutant
orf19.4743	0.739479	0.454449	0.984052	0.902533	AFG1	1.33074	Protein not essential for viability; similar to S. cerevisiae Afg1p, which is a putative mitochondrial ATPase of the AAA family		GO:0016887 ATPase activity |
orf19.1956	1.00823	0.967975	1.3415	0.275003		1.33056	Predicted ORF in Assemblies 19, 20 and 21	GO:0007131 reciprocal meiotic recombination |
orf19.5320	1.09985	0.0145458	1.46214	0.380835	NCE4	1.3294	Predicted ORF in Assemblies 19, 20 and 21; periodic mRNA expression, peak at cell-cycle G2/M phase
orf19.1210	1.26256	0.0476106	1.67812	0.0389827		1.32914	Predicted ORF in Assemblies 19, 20 and 21
orf19.7092	0.738333	0.290923	0.981115	0.942343		1.32882	Predicted ORF in Assemblies 19, 20 and 21			GO:0005739 mitochondrion |
orf19.7365	0.949461	0.85025	1.26114	0.0138558		1.32827	Predicted ORF in Assemblies 19, 20 and 21	GO:0043161 proteasomal ubiquitin-dependent protein catabolic process | GO:0006916 anti-apoptosis | GO:0045721 negative regulation of gluconeogenesis |		GO:0005634 nucleus | GO:0005737 cytoplasm | GO:0034657 GID complex |
orf19.4580	0.925833	0.328219	1.22971	0.203403		1.32822	Predicted ORF in Assemblies 19, 20 and 21
orf19.2821	0.968705	0.911378	1.28613	0.72642		1.32768	Predicted ORF in Assemblies 19, 20 and 21; repressed by nitric oxide
orf19.7178	0.695094	0.317495	0.922595	0.210053	PRE5	1.32729	Alpha6 subunit of the 20S proteasome; regulated by Gcn4p; induced in response to amino acid starvation (3-aminotriazole treatment)	GO:0006511 ubiquitin-dependent protein catabolic process |	GO:0004175 endopeptidase activity |	GO:0019773 proteasome core complex, alpha-subunit complex | GO:0005839 proteasome core complex | GO:0034515 proteasome storage granule |
orf19.7110	0.93928	0.224474	1.24668	0.0417748		1.32727	Predicted ORF in Assemblies 19, 20 and 21	GO:0006400 tRNA modification |	GO:0043829 tRNA-specific adenosine-37 deaminase activity |	GO:0005634 nucleus |
orf19.3664	1.05638	0.768652	1.40145	0.235418	HSP31	1.32666	Protein repressed during the mating process	GO:0042026 protein refolding | GO:0006950 response to stress |		GO:0005886 plasma membrane |
orf19.2695	0.807988	0.473815	1.07136	0.907108	UBR1	1.32596	Protein similar to S. cerevisiae Ubr1p ubiquitin-protein ligase; transposon mutation affects filamentous growth	GO:0030447 filamentous growth | GO:0000209 protein polyubiquitination | GO:0006513 protein monoubiquitination | GO:0016567 protein ubiquitination | GO:0006515 misfolded or incompletely synthesized protein catabolic process |	GO:0004842 ubiquitin-protein ligase activity |	GO:0005737 cytoplasm | GO:0000502 proteasome complex |
orf19.5290	0.891224	0.0584377	1.18173	0.602018		1.32596	Transcription is negatively regulated by Sfu1p
orf19.4914	0.899463	0.443495	1.19254	0.347354		1.32583	Predicted ORF in Assemblies 19, 20 and 21
orf19.6011	0.780791	0.477586	1.03464	0.946633	SIN3	1.32512	Protein similar to S. cerevisiae Sin3p (transcriptional corepressor involved in histone deacetylase recruitment); has paired amphipathic helix PAH1 domain; interacts with ScOpi1p, not CaOpi1p; transposon mutation affects filamentous growth	GO:0000122 negative regulation of transcription from RNA polymerase II promoter | GO:0030447 filamentous growth | GO:0006348 chromatin silencing at telomere | GO:0010552 positive regulation of gene-specific transcription from RNA polymerase II promoter | GO:0016575 histone deacetylation | GO:0010526 negative regulation of transposition, RNA-mediated | GO:0030466 chromatin silencing at silent mati…	GO:0003677 DNA binding | GO:0016564 transcription repressor activity | GO:0004407 histone deacetylase activity | GO:0003714 transcription corepressor activity | GO:0003713 transcription coactivator activity |	GO:0033698 Rpd3L complex | GO:0016580 Sin3 complex | GO:0070210 Rpd3L-Expanded complex | GO:0032221 Rpd3S complex |
orf19.2009	0.798956	0.446204	1.05856	0.88722		1.32493	Predicted ORF in Assemblies 19, 20 and 21	GO:0016558 protein import into peroxisome matrix |	GO:0005515 protein binding |	GO:0005779 integral to peroxisomal membrane |
orf19.1730	1.00368	0.992996	1.32908	0.389233		1.3242	Predicted ORF in Assemblies 19, 20 and 21	GO:0006338 chromatin remodeling |		GO:0031011 Ino80 complex |
orf19.4609	0.594948	0.157122	0.787827	0.00110967		1.32419	Protein abundance is affected by URA3 expression in the CAI-4 strain background; protein detected by mass spec in exponential and stationary phase cultures			GO:0005737 cytoplasm |
orf19.6030	0.727684	0.59052	0.963541	0.956802		1.32412	Predicted ORF in Assemblies 19, 20 and 21
orf19.1343	0.864706	0.243731	1.14483	0.23502		1.32395	Predicted ORF in Assemblies 19, 20 and 21; induced by nitric oxide
orf19.6908	1.04304	0.459497	1.3808	0.215806		1.32383	Predicted ORF in Assemblies 19, 20 and 21	GO:0009396 folic acid and derivative biosynthetic process |	GO:0008841 dihydrofolate synthase activity |	GO:0005737 cytoplasm |
orf19.6904	0.617202	0.440428	0.816921	0.475536	GCN3	1.32359	Protein described as a translation initiator; downregulated in the presence of human whole blood or polymorphonuclear (PMN) cells	GO:0006413 translational initiation | GO:0006446 regulation of translational initiation |	GO:0005085 guanyl-nucleotide exchange factor activity | GO:0030234 enzyme regulator activity | GO:0003743 translation initiation factor activity |	GO:0005851 eukaryotic translation initiation factor 2B complex | GO:0032045 guanyl-nucleotide exchange factor complex |
orf19.861	0.935127	0.815014	1.23761	0.0403499		1.32347	Predicted transcriptional regulator with bZip domain	GO:0006350 transcription | GO:0006355 regulation of transcription, DNA-dependent |	GO:0003700 transcription factor activity |	GO:0005634 nucleus |
orf19.2064	0.927473	0.6266	1.22743	0.522823		1.32341	Putative transcription factor with zinc finger DNA-binding motif	GO:0006355 regulation of transcription, DNA-dependent |	GO:0003700 transcription factor activity |
orf19.6797	0.899199	0.720278	1.18985	0.455186		1.32323	Predicted ORF in Assemblies 19, 20 and 21
orf19.130	0.920478	0.878915	1.21783	0.553097		1.32304	Predicted ORF in Assemblies 19, 20 and 21	GO:0045324 late endosome to vacuole transport | GO:0006623 protein targeting to vacuole | GO:0006468 protein amino acid phosphorylation | GO:0016236 macroautophagy | GO:0048017 inositol lipid-mediated signaling | GO:0045053 protein retention in Golgi apparatus |	GO:0004674 protein serine/threonine kinase activity |	GO:0000139 Golgi membrane | GO:0005739 mitochondrion | GO:0034272 phosphatidylinositol 3-kinase complex II | GO:0034271 phosphatidylinositol 3-kinase complex I |
orf19.1617	1.01278	0.894293	1.33974	0.460095		1.32283	Protein similar to S. cerevisiae Ydr282cp; transposon mutation affects filamentous growth	GO:0030447 filamentous growth |
orf19.248	0.875546	0.792159	1.15754	0.807896	APL5	1.32208	Phosphorylated protein, not essential for viability; similar to S. cerevisiae Apl5p, which is a subunit of the AP-3 adaptor complex involved in Golgi-to-vacuole transport	GO:0006896 Golgi to vacuole transport |	GO:0005515 protein binding |	GO:0030123 AP-3 adaptor complex |
orf19.4191.1	0.796292	0.662986	1.05267	0.911461		1.32196	ORF Predicted by Annotation Working Group	GO:0006513 protein monoubiquitination | GO:0000209 protein polyubiquitination | GO:0030433 ER-associated protein catabolic process |	GO:0034450 ubiquitin-ubiquitin ligase activity |	GO:0000502 proteasome complex | GO:0005634 nucleus | GO:0005737 cytoplasm |
orf19.6100	1.07597	0.933104	1.42192	0.751264		1.32152	Protein not essential for viability; similar to S. cerevisiae Crd1p, which is cardiolipin synthase; transcription is upregulated in clinical isolates from HIV+ patients with oral candidiasis	GO:0006873 cellular ion homeostasis | GO:0008610 lipid biosynthetic process | GO:0007006 mitochondrial membrane organization |	GO:0043337 CDP-diacylglycerol-phosphatidylglycerol phosphatidyltransferase activity | GO:0008808 cardiolipin synthase activity |	GO:0005740 mitochondrial envelope |
orf19.6080	0.919558	0.835195	1.21502	0.374311		1.3213	Predicted ORF in Assemblies 19, 20 and 21	GO:0031578 mitotic cell cycle spindle orientation checkpoint |		GO:0005816 spindle pole body |
orf19.3199	0.839988	0.138777	1.10976	0.557632	PIKA	1.32116	Putative phosphatidylinositol kinase; gene is located within the MTLa mating-type-like locus	GO:0007165 signal transduction | GO:0006893 Golgi to plasma membrane transport | GO:0046854 phosphoinositide phosphorylation |	GO:0004428 inositol or phosphatidylinositol kinase activity | GO:0004430 1-phosphatidylinositol 4-kinase activity |	GO:0005634 nucleus | GO:0005802 trans-Golgi network |
orf19.6753	0.698897	0.54218	0.923317	0.255514		1.32111	Predicted ORF in Assemblies 19, 20 and 21
orf19.7035	0.907225	0.707005	1.1982	0.710754	RFC2	1.32073	Predicted ORF in Assemblies 19, 20 and 21; periodic mRNA expression, peak at cell-cycle G1/S phase	GO:0006298 mismatch repair | GO:0006272 leading strand elongation | GO:0000075 cell cycle checkpoint | GO:0007062 sister chromatid cohesion |	GO:0003689 DNA clamp loader activity |	GO:0031391 Elg1 RFC-like complex | GO:0031390 Ctf18 RFC-like complex | GO:0031389 Rad17 RFC-like complex | GO:0005663 DNA replication factor C complex |
orf19.1524	1.02978	0.827123	1.35979	0.29154	SPR3	1.32047	Septin; mutant has no obvious phenotype	GO:0000902 cell morphogenesis | GO:0007047 cell wall organization |	GO:0005200 structural constituent of cytoskeleton |	GO:0000144 cellular bud neck septin ring | GO:0005628 prospore membrane |
orf19.2108	0.955119	0.0311857	1.26098	0.565271	SOD6	1.32023	Copper- and zinc-containing superoxide dismutase; expression regulated during planktonic growth; member of a gene family that includes SOD1, SOD4, SOD5, and SOD6; gene may contain an intron		GO:0004784 superoxide dismutase activity |	GO:0009986 cell surface |
orf19.6008.4	1.22969	0.392052	1.623	0.199888		1.31985	Predicted ORF in Assembly 20 and 21
orf19.2439.1	1.23578	0.347253	1.63014	0.132468		1.31911	ORF Predicted by Annotation Working Group	GO:0006122 mitochondrial electron transport, ubiquinol to cytochrome c | GO:0009060 aerobic respiration |	GO:0008121 ubiquinol-cytochrome-c reductase activity |	GO:0005750 mitochondrial respiratory chain complex III |
orf19.1204	0.900688	0.766739	1.18775	0.681569		1.31872	Phosphorylated protein of unknown function, transcription is upregulated clinical isolates from HIV positive patients with oral candidiasis; predicted ORF in Assemblies 19, 20 and 21	GO:0006896 Golgi to vacuole transport |		GO:0030123 AP-3 adaptor complex |
orf19.4809	1.05345	0.550893	1.38891	0.223615	ERG12	1.31843	Predicted ORF in Assemblies 19, 20 and 21	GO:0006696 ergosterol biosynthetic process |	GO:0004496 mevalonate kinase activity |	GO:0005829 cytosol |
orf19.590	0.673305	0.103767	0.887483	0.468635		1.3181	Predicted ORF in Assemblies 19, 20 and 21; decreased expression observed in an ssr1 homozygous null mutant; protein detected by mass spec in exponential and stationary phase cultures
orf19.4269	0.892659	0.523388	1.17661	0.664321		1.3181	Predicted ORF in Assemblies 19, 20 and 21
orf19.1827	0.941561	0.182097	1.24091	0.0288069		1.31793	Predicted ORF in Assemblies 19, 20 and 21; transcription is induced in response to alpha pheromone in SpiderM medium
orf19.3181.1	0.720678	0.514366	0.949798	0.873364		1.31792	ORF Predicted by Annotation Working Group	GO:0009306 protein secretion |
orf19.2137	0.981315	0.958726	1.29288	0.734462		1.3175	Predicted ORF in Assemblies 19, 20 and 21
orf19.6461	0.998359	0.993318	1.31408	0.0512525		1.31624	Predicted ORF in Assemblies 19, 20 and 21	GO:0009060 aerobic respiration | GO:0033617 mitochondrial respiratory chain complex IV assembly | GO:0016485 protein processing |	GO:0051082 unfolded protein binding |	GO:0005743 mitochondrial inner membrane |
orf19.1220	0.744183	0.589242	0.97929	0.972449	RVS167	1.31593	Protein involved in endocytosis; contains a BAR domain; null mutant exhibits defects in hyphal growth, virulence, cell wall integrity, and actin patch localization; cosediments with phosphorylated Myo5p	GO:0006970 response to osmotic stress | GO:0007121 bipolar cellular bud site selection | GO:0009405 pathogenesis | GO:0031505 fungal-type cell wall organization | GO:0030448 hyphal growth | GO:0051666 actin cortical patch localization | GO:0006897 endocytosis |	GO:0008092 cytoskeletal protein binding |	GO:0030479 actin cortical patch | GO:0043332 mating projection tip |
orf19.1336	0.748446	0.408152	0.98465	0.86556	PUP3	1.31559	Predicted ORF in Assemblies 19, 20 and 21; macrophage/pseudohyphal-repressed	GO:0006511 ubiquitin-dependent protein catabolic process |	GO:0004175 endopeptidase activity |	GO:0019774 proteasome core complex, beta-subunit complex |
orf19.1736	0.976095	0.885255	1.28289	0.394902		1.31431	Predicted ORF in Assemblies 19, 20 and 21
orf19.3309	0.70878	0.497016	0.931504	0.700866		1.31424	Predicted ORF in Assemblies 19, 20 and 21
orf19.397	0.96654	0.957348	1.26967	0.72248		1.31363	Predicted ORF in Assemblies 19, 20 and 21		GO:0003735 structural constituent of ribosome |	GO:0005762 mitochondrial large ribosomal subunit |
orf19.1560	0.856414	0.712999	1.12472	0.781783	POB3	1.31329	Protein similar to S. cerevisiae Pob3p, which is involved in chromatin assembly and disassembly; transposon mutation affects filamentous growth	GO:0030447 filamentous growth | GO:0006338 chromatin remodeling | GO:0006368 RNA elongation from RNA polymerase II promoter | GO:0006367 transcription initiation from RNA polymerase II promoter | GO:0006334 nucleosome assembly | GO:0006261 DNA-dependent DNA replication |	GO:0003682 chromatin binding |	GO:0005658 alpha DNA polymerase | GO:0035101 FACT complex | GO:0000790 nuclear chromatin |
orf19.4543	1.00315	0.962153	1.31715	0.473639	UGA2	1.31302	Protein not essential for viability; similar to S. cerevisiae Uga2p, which is succinate semialdehyde dehydrogenase with a role in glutamate catabolism; transcription regulated by Mig1p, Tup1p, Gcn4p	GO:0006979 response to oxidative stress | GO:0006538 glutamate catabolic process |	GO:0009013 succinate-semialdehyde dehydrogenase [NAD(P)+] activity |
orf19.3820	1.14777	0.788154	1.50701	0.399966		1.31299	Predicted ORF in Assemblies 19, 20 and 21; clade-associated gene expression
orf19.1161	0.781913	0.162764	1.02657	0.697921	PLD1	1.3129	Phospholipase D1; required for phosphatidic acid and for most diacylglycerol production; required for wild-type mouse virulence, but not rat oral virulence; mutant defect in hyphal growth on solid substrates; similar to S. cerevisiae Spo14p	GO:0030448 hyphal growth | GO:0009405 pathogenesis | GO:0007126 meiosis | GO:0031321 ascospore-type prospore formation | GO:0006887 exocytosis | GO:0006644 phospholipid metabolic process | GO:0000753 cellular morphogenesis during conjugation with cellular fusion |	GO:0004630 phospholipase D activity | GO:0032266 phosphatidylinositol 3-phosphate binding |	GO:0005768 endosome | GO:0005628 prospore membrane |
orf19.6058	0.765435	0.489675	1.00486	0.950445	GLO1	1.31279	Predicted ORF in Assemblies 19, 20 and 21; oxidative stress-induced via Cap1p	GO:0006749 glutathione metabolic process | GO:0019243 methylglyoxal catabolic process to D-lactate |	GO:0004462 lactoylglutathione lyase activity |	GO:0005634 nucleus | GO:0005737 cytoplasm |
orf19.5710	0.888561	0.314386	1.16592	0.277818		1.31215	Predicted ORF in Assemblies 19, 20 and 21	GO:0006609 mRNA-binding (hnRNP) protein import into nucleus | GO:0006607 NLS-bearing substrate import into nucleus | GO:0006606 protein import into nucleus | GO:0006998 nuclear envelope organization | GO:0006406 mRNA export from nucleus |	GO:0005198 structural molecule activity | GO:0005515 protein binding |	GO:0005643 nuclear pore |
orf19.427	0.765835	0.750115	1.00456	0.991797		1.31172	Predicted ORF in Assemblies 19, 20 and 21
orf19.3483	0.895667	0.484944	1.17445	0.735051		1.31126	Predicted ORF in Assemblies 19, 20 and 21; Plc1p-regulated	GO:0034478 phosphatidylglycerol catabolic process |	GO:0034479 phosphatidylglycerol phospholipase C activity |	GO:0005739 mitochondrion | GO:0005783 endoplasmic reticulum |
orf19.2397.3	0.945795	0.822169	1.24017	0.422294		1.31125	ORF Predicted by Annotation Working Group
orf19.3012	0.797079	0.420773	1.04475	0.867935	ARO80	1.31072	Regulator of aromatic alcohol biosynthesis via the Ehrlich pathway; not essential for viability; similar to S. cerevisiae Aro80p, which is a transcriptional activator required for aromatic amino acid catabolism	GO:0006350 transcription | GO:0045944 positive regulation of transcription from RNA polymerase II promoter | GO:0009074 aromatic amino acid family catabolic process |	GO:0003700 transcription factor activity | GO:0043565 sequence-specific DNA binding | GO:0003704 specific RNA polymerase II transcription factor activity |
orf19.5130	0.749132	0.290659	0.981775	0.750844	PDI1	1.31055	Protein described as protein disulfide-isomerase; antigenic in human; soluble protein in hyphae; transcription is induced upon filamentous growth	GO:0006457 protein folding |	GO:0003756 protein disulfide isomerase activity | GO:0015035 protein disulfide oxidoreductase activity |	GO:0009986 cell surface | GO:0005625 soluble fraction | GO:0005788 endoplasmic reticulum lumen |
orf19.7159	0.91467	0.729533	1.19825	0.130128		1.31003	Predicted ORF in Assemblies 19, 20 and 21
orf19.581	0.791226	0.73038	1.03626	0.952093		1.30969	Putative protein of unknown function, transcription is upregulated in an RHE model of oral candidiasis; predicted ORF in Assemblies 19, 20 and 21	GO:0030847 termination of RNA polymerase II transcription, poly(A)-independent |	GO:0003723 RNA binding |	GO:0005634 nucleus | GO:0000176 nuclear exosome (RNase complex) |
orf19.7330	0.926645	0.804427	1.21339	0.0291633		1.30944	Predicted ORF in Assemblies 19, 20 and 21	GO:0006772 thiamin metabolic process | GO:0007005 mitochondrion organization |		GO:0005829 cytosol |
orf19.3574	1.12528	0.493285	1.47302	0.671399		1.30903	Predicted ORF in Assemblies 19, 20 and 21	GO:0006457 protein folding | GO:0030150 protein import into mitochondrial matrix |	GO:0008565 protein transporter activity | GO:0001671 ATPase activator activity |	GO:0001405 presequence translocase-associated import motor |
orf19.5093	0.990696	0.970769	1.29631	0.113521		1.30849	Predicted ORF in Assemblies 19, 20 and 21	GO:0007059 chromosome segregation | GO:0033262 regulation of DNA replication during S phase | GO:0000086 G2/M transition of mitotic cell cycle | GO:0006337 nucleosome disassembly | GO:0006368 RNA elongation from RNA polymerase II promoter | GO:0043044 ATP-dependent chromatin remodeling | GO:0006302 double-strand break repair | GO:0031055 chromatin remodeling at centromere |	GO:0008094 DNA-dependent ATPase activity |	GO:0016586 RSC complex |
orf19.4928	1.0278	0.901138	1.34453	0.472578		1.30817	Predicted ORF in Assemblies 19, 20 and 21	GO:0006887 exocytosis |	GO:0005085 guanyl-nucleotide exchange factor activity |	GO:0043332 mating projection tip | GO:0005829 cytosol | GO:0030133 transport vesicle |
orf19.3308	0.716691	0.460312	0.937397	0.785995		1.30795	Putative transcription factor with zinc cluster DNA-binding motif; has similarity to S. cerevisiae Stb5p	GO:0006355 regulation of transcription, DNA-dependent | GO:0043619 regulation of transcription from RNA polymerase II promoter in response to oxidative stress | GO:0042493 response to drug | GO:0006350 transcription | GO:0009410 response to xenobiotic stimulus |	GO:0003700 transcription factor activity | GO:0043565 sequence-specific DNA binding |	GO:0005634 nucleus |
orf19.2753	0.914935	0.484027	1.19621	0.543158		1.30742	Predicted zinc-finger protein of unknown function
orf19.5140	0.732329	0.587716	0.957363	0.867713		1.30728	Predicted ORF in Assemblies 19, 20 and 21
orf19.3402	0.795545	0.72629	1.03991	0.939601	FPG1	1.30717	Formamidopyrimidine DNA glycosylase, involved in repair of gamma-irradiated DNA	GO:0006285 base-excision repair, AP site formation |	GO:0008534 oxidized purine base lesion DNA N-glycosylase activity |
orf19.841	0.580795	0.291386	0.759092	0.389403		1.30699	Predicted ORF in Assemblies 19, 20 and 21	GO:0048193 Golgi vesicle transport |		GO:0000139 Golgi membrane |
orf19.1490	0.968174	0.627946	1.26485	0.394339	MSB2	1.30643	Mucin family member, possible sensor of cell wall damage; required for Cek1p phosphorylation in response to cell wall stress; transcription is negatively regulated by Rim101p	GO:0007232 osmosensory signaling pathway via Sho1 osmosensor | GO:0001402 signal transduction during filamentous growth | GO:0030010 establishment of cell polarity | GO:0006972 hyperosmotic response | GO:0090033 positive regulation of filamentous growth | GO:0007047 cell wall organization |	GO:0005034 osmosensor activity |	GO:0030427 site of polarized growth | GO:0005887 integral to plasma membrane | GO:0005576 extracellular region |
orf19.5544	0.85732	0.438368	1.1197	0.767937	SAC6	1.30605	Transcription is regulated by Nrg1p and Mig1p; protein level decreased in stationary phase cultures	GO:0006970 response to osmotic stress | GO:0007121 bipolar cellular bud site selection | GO:0006897 endocytosis | GO:0030046 parallel actin filament bundle formation | GO:0007015 actin filament organization |	GO:0051015 actin filament binding | GO:0030674 protein binding, bridging |	GO:0030479 actin cortical patch | GO:0043332 mating projection tip |
orf19.5234	1.08717	0.362729	1.41975	0.489058	RBD1	1.30591	Rhomboid-like protein; similar to putative intramembrane serine proteases; involved in filamentous growth; Gcn4p-regulated; caspofungin repressed	GO:0030447 filamentous growth |
orf19.2190	0.976914	0.423624	1.27524	0.745623	VRP1	1.30538	Protein described as verprolin; downregulated upon adherence to polystyrene	GO:0006970 response to osmotic stress | GO:0051666 actin cortical patch localization | GO:0006897 endocytosis | GO:0007121 bipolar cellular bud site selection | GO:0007015 actin filament organization |	GO:0003779 actin binding |	GO:0043332 mating projection tip | GO:0030479 actin cortical patch | GO:0005935 cellular bud neck | GO:0000131 incipient cellular bud site |
orf19.176	1.07506	0.177174	1.40318	0.00855724	OPT4	1.30522	Oligopeptide transporter; detected at germ tube plasma membrane by mass spectrometry; transcriptionally induced upon phagocytosis by macrophage; fungal-specific (no human or murine homolog); merged with orf19.2292 in Assembly 20	GO:0006857 oligopeptide transport | GO:0019740 nitrogen utilization |	GO:0015198 oligopeptide transporter activity |	GO:0005886 plasma membrane |
orf19.2049	0.833741	0.220897	1.0881	0.509207		1.30509	Predicted ORF in Assemblies 19, 20 and 21; heterozygous null mutant displays sensitivity to virgineone			GO:0005886 plasma membrane |
orf19.3371	0.851636	0.699219	1.11129	0.842676		1.30489	Predicted ORF in Assemblies 19, 20 and 21
orf19.4589	0.759374	0.374527	0.990502	0.929666		1.30437	Predicted ORF in Assemblies 19, 20 and 21	GO:0006598 polyamine catabolic process | GO:0015940 pantothenate biosynthetic process |	GO:0008131 amine oxidase activity |	GO:0005737 cytoplasm |
orf19.7444	1.02392	0.92201	1.33553	0.637332		1.30434	Predicted ORF in Assemblies 19, 20 and 21			GO:0005634 nucleus | GO:0005737 cytoplasm |
orf19.5104	0.823521	0.579382	1.07369	0.688854	LTP1	1.30378	Putative protein phosphatase of the PTP family (tyrosine-specific), similar to S. cerevisiae Ltp1p	GO:0006470 protein amino acid dephosphorylation |	GO:0004725 protein tyrosine phosphatase activity |	GO:0005634 nucleus | GO:0005737 cytoplasm |
orf19.5041	1.01415	0.909064	1.32208	0.29715		1.30363	Predicted ORF in Assemblies 19, 20 and 21
orf19.3579	0.967136	0.86576	1.26065	0.203069	ATP4	1.30348	Predicted ORF in Assemblies 19, 20 and 21; macrophage/pseudohyphal-induced	GO:0015986 ATP synthesis coupled proton transport |	GO:0046961 proton-transporting ATPase activity, rotational mechanism | GO:0046933 hydrogen ion transporting ATP synthase activity, rotational mechanism | GO:0016887 ATPase activity |	GO:0000274 mitochondrial proton-transporting ATP synthase, stator stalk | GO:0005753 mitochondrial proton-transporting ATP synthase complex | GO:0005886 plasma membrane |
orf19.4430	0.955982	0.684366	1.24607	0.628306		1.30344	Predicted ORF in Assemblies 19, 20 and 21			GO:0005634 nucleus | GO:0005737 cytoplasm |
orf19.4016	1.17891	0.140547	1.53662	0.101029		1.30343	Predicted ORF in Assemblies 19, 20 and 21; amphotericin B induced; repressed by nitric oxide; protein level decreased in stationary phase cultures	GO:0009060 aerobic respiration |	GO:0008121 ubiquinol-cytochrome-c reductase activity |	GO:0005750 mitochondrial respiratory chain complex III |
orf19.1872	1.1874	0.0374508	1.5473	0.22492		1.3031	Predicted ORF in Assemblies 19, 20 and 21; repressed by nitric oxide			GO:0005886 plasma membrane |
orf19.2099	0.980218	0.946861	1.27688	0.197625		1.30265	Predicted ORF in Assemblies 19, 20 and 21	GO:0006368 RNA elongation from RNA polymerase II promoter | GO:0006336 DNA replication-independent nucleosome assembly | GO:0006357 regulation of transcription from RNA polymerase II promoter |	GO:0003714 transcription corepressor activity | GO:0003677 DNA binding | GO:0031491 nucleosome binding |	GO:0000775 chromosome, centromeric region | GO:0000417 HIR complex |
orf19.5504	0.764009	0.719341	0.99516	0.994566		1.30255	Predicted ORF in Assemblies 19, 20 and 21
orf19.5735.3	1.17202	0.369841	1.52582	0.418749		1.30187	ORF Predicted by Annotation Working Group
orf19.4807	0.941529	0.214602	1.22491	0.101798		1.30098	Predicted ORF in Assemblies 19, 20 and 21	GO:0007585 respiratory gaseous exchange | GO:0009060 aerobic respiration |	GO:0004427 inorganic diphosphatase activity |	GO:0005739 mitochondrion |
orf19.2325	0.960213	0.760856	1.24922	0.283227		1.30098	Predicted ORF in Assemblies 19, 20 and 21	GO:0006384 transcription initiation from RNA polymerase III promoter |	GO:0003709 RNA polymerase III transcription factor activity |	GO:0000127 transcription factor TFIIIC complex |
orf19.779	0.88149	0.713815	1.14677	0.822031		1.30094	Predicted ORF in Assemblies 19, 20 and 21	GO:0006348 chromatin silencing at telomere | GO:0016573 histone acetylation |	GO:0042393 histone binding | GO:0004406 H3/H4 histone acetyltransferase activity |	GO:0005737 cytoplasm | GO:0000123 histone acetyltransferase complex |
orf19.4590	0.942825	0.714483	1.22577	0.265412	RFX2	1.3001	Transcriptional repressor; regulator of filamentation, response to DNA damage, adhesion, virulence in murine mucosal, systemic infections; RFX domain; regulated by Nrg1p, UV-induced; partially complements S. cerevisiae rfx1 mutant defects	GO:0009405 pathogenesis | GO:0044406 adhesion to host | GO:0060258 negative regulation of filamentous growth | GO:0034599 cellular response to oxidative stress | GO:0034605 cellular response to heat | GO:0009411 response to UV | GO:0010768 negative regulation of transcription from RNA polymerase II promoter in response to UV-induced DNA damage | GO:0010553 negative regulation of gene-specific tra…	GO:0003700 transcription factor activity | GO:0016566 specific transcriptional repressor activity |	GO:0005634 nucleus | GO:0005737 cytoplasm |
orf19.1888	0.769754	0.214225	1.00014	0.998891		1.29929	Predicted ORF in Assemblies 19, 20 and 21	GO:0008655 pyrimidine salvage | GO:0034356 NAD biosynthesis via nicotinamide riboside salvage pathway | GO:0030433 ER-associated protein catabolic process | GO:0019358 nicotinate nucleotide salvage | GO:0046135 pyrimidine nucleoside catabolic process |	GO:0070636 nicotinic acid riboside hydrolase activity | GO:0045437 uridine nucleosidase activity | GO:0070635 nicotinamide riboside hydrolase activity | GO:0050263 ribosylpyrimidine nucleosidase activity |	GO:0005634 nucleus | GO:0005737 cytoplasm |
orf19.5068	0.938676	0.615436	1.21958	0.0585309		1.29925	Predicted ORF in Assemblies 19, 20 and 21	GO:0006987 activation of signaling protein activity involved in unfolded protein response | GO:0006468 protein amino acid phosphorylation | GO:0031505 fungal-type cell wall organization | GO:0030968 endoplasmic reticulum unfolded protein response | GO:0006020 inositol metabolic process |	GO:0051082 unfolded protein binding | GO:0042803 protein homodimerization activity | GO:0004674 protein serine/threonine kinase activity | GO:0004521 endoribonuclease activity |	GO:0005635 nuclear envelope | GO:0005789 endoplasmic reticulum membrane | GO:0005634 nucleus |
orf19.5137	0.852656	0.580129	1.1078	0.727545		1.29924	Predicted ORF in Assemblies 19, 20 and 21; possibly spurious ORF (Annotation Working Group prediction)
orf19.2570	0.991464	0.937885	1.28811	0.355904		1.2992	Predicted ORF in Assemblies 19, 20 and 21
orf19.1873	0.995113	0.99551	1.29271	0.732359		1.29906	Predicted ORF in Assemblies 19, 20 and 21; repressed by nitric oxide; possibly spurious ORF (Annotation Working Group prediction)
orf19.863	0.984193	0.86191	1.27825	0.23767		1.29878	Predicted ORF in Assemblies 19, 20 and 21		GO:0003735 structural constituent of ribosome |	GO:0005762 mitochondrial large ribosomal subunit |
orf19.5368	1.06239	0.329565	1.3798	0.395509		1.29877	Predicted ORF in Assemblies 19, 20 and 21			GO:0005739 mitochondrion |
orf19.1564	1.17633	0.718187	1.52763	0.134565		1.29864	Predicted ORF in Assemblies 19, 20 and 21			GO:0005783 endoplasmic reticulum | GO:0005886 plasma membrane |
orf19.7678	0.844306	0.225434	1.0964	0.595998		1.29858	Predicted ORF in Assemblies 19, 20 and 21	GO:0015986 ATP synthesis coupled proton transport |	GO:0046933 hydrogen ion transporting ATP synthase activity, rotational mechanism | GO:0016887 ATPase activity |	GO:0005756 mitochondrial proton-transporting ATP synthase, central stalk |
orf19.1327	0.98939	0.838876	1.28458	0.370975	RBT1	1.29835	Putative cell wall protein with similarity to Hwp1p, required for virulence; predicted to be cell-wall attached and glycosylated; Tup1p repressed; serum, hyphal and alkaline induced; farnesol, alpha factor induced; Rfg1p-, Rim101p-regulated	GO:0009405 pathogenesis | GO:0031505 fungal-type cell wall organization |		GO:0009986 cell surface | GO:0009277 fungal-type cell wall | GO:0030446 hyphal cell wall |
orf19.1762	0.887973	0.615222	1.15265	0.871555	OCA1	1.29806	Putative protein phosphatase of the PTP family (tyrosine-specific), similar to S. cerevisiae Oca1p; mutant shows virulence defect; not essential for viability	GO:0006470 protein amino acid dephosphorylation |	GO:0004725 protein tyrosine phosphatase activity |
orf19.6628	0.922432	0.300028	1.19735	0.117869		1.29804	Predicted ORF in Assemblies 19, 20 and 21	GO:0007020 microtubule nucleation | GO:0007059 chromosome segregation |	GO:0005200 structural constituent of cytoskeleton |	GO:0005816 spindle pole body | GO:0000775 chromosome, centromeric region |
orf19.2356	0.817373	0.677267	1.06083	0.936985	CRZ2	1.29785	Putative transcription factor; zinc finger; similar to S. cerevisiae Crz1p; homozygous crz1, not crz2, null mutation suppresses fluconazole resistance of homozygous cka2 null (defective in CK2 kinase ); Rim101p-downregulated at pH 8	GO:0006355 regulation of transcription, DNA-dependent | GO:0010447 response to acidity |	GO:0003700 transcription factor activity |
orf19.6005	0.806648	0.418132	1.04687	0.859666	HGT5	1.2978	Putative glucose transporter of the major facilitator superfamily; the C. albicans glucose transporter family comprises 20 members; 12 probable membrane-spanning segments, extended N terminus; expressed in rich medium with 2% glucose	GO:0015758 glucose transport | GO:0008643 carbohydrate transport |	GO:0005355 glucose transmembrane transporter activity | GO:0051119 sugar transmembrane transporter activity |	GO:0005887 integral to plasma membrane | GO:0016020 membrane |
orf19.828	1.35177	0.533645	1.75396	0.321693		1.29753	Predicted ORF in Assemblies 19, 20 and 21; decreased expression in response to prostaglandins		GO:0003735 structural constituent of ribosome |	GO:0005762 mitochondrial large ribosomal subunit |
orf19.3136	0.666243	0.530328	0.863957	0.820723		1.29676	Predicted ORF in Assemblies 19, 20 and 21
orf19.6528	0.8697	0.403438	1.12754	0.443951		1.29647	Predicted ORF in Assemblies 19, 20 and 21
orf19.4151	0.494989	0.460038	0.64111	0.407589	SPO1	1.2952	Protein similar to phospholipase B; fungal-specific (no human or murine homolog)	GO:0007126 meiosis | GO:0070583 spore membrane bending pathway |	GO:0004620 phospholipase activity |	GO:0005634 nucleus | GO:0005783 endoplasmic reticulum | GO:0005628 prospore membrane |
orf19.6393	1.13618	0.495498	1.47158	0.578411		1.2952	Predicted ORF in Assemblies 19, 20 and 21	GO:0001302 replicative cell aging | GO:0006855 multidrug transport | GO:0001300 chronological cell aging | GO:0000902 cell morphogenesis | GO:0051726 regulation of cell cycle | GO:0006897 endocytosis | GO:0030437 ascospore formation | GO:0007624 ultradian rhythm | GO:0045449 regulation of transcription |	GO:0003704 specific RNA polymerase II transcription factor activity | GO:0008060 ARF GTPase activator activity | GO:0030528 transcription regulator activity |	GO:0005634 nucleus | GO:0030479 actin cortical patch |
orf19.7239	1.01366	0.94285	1.31261	0.568231		1.29492	Predicted ORF in Assemblies 19, 20 and 21		GO:0003677 DNA binding |
orf19.4779	1.03567	0.951265	1.34083	0.744386		1.29465	Putative transporter; slightly similar to the Sit1p siderophore transporter; Gcn4p-regulated; fungal-specific (no human or murine homolog); transcriptionally activated by Mnl1p under weak acid stress	GO:0015893 drug transport |	GO:0015239 multidrug transporter activity | GO:0015238 drug transporter activity |	GO:0016020 membrane |
orf19.729	0.879778	0.810876	1.13899	0.751968	SHE3	1.29464	Protein similar to S. cerevisiae She3p; transposon mutation affects filamentous growth	GO:0030447 filamentous growth |
orf19.1649	0.746239	0.0274512	0.966082	0.868713	RNA1	1.2946	Predicted ORF in Assemblies 19, 20 and 21; protein level decreased in stationary phase cultures	GO:0006348 chromatin silencing at telomere | GO:0006606 protein import into nucleus | GO:0006404 RNA import into nucleus | GO:0000054 ribosome export from nucleus | GO:0016072 rRNA metabolic process | GO:0006399 tRNA metabolic process | GO:0006407 rRNA export from nucleus |	GO:0005098 Ran GTPase activator activity |	GO:0005829 cytosol | GO:0005634 nucleus |
orf19.3151	1.02983	0.81417	1.33318	0.352866		1.29457	Predicted ORF in Assemblies 19, 20 and 21		GO:0016491 oxidoreductase activity |
orf19.2062	0.863162	0.116749	1.11717	0.619615	SOD4	1.29427	Copper- and zinc-containing superoxide dismutase; role in response to host innate immune ROS; regulated on white-opaque switching; ciclopirox olamine induced; caspofungin repressed; member of family that includes SOD1, SOD4, SOD5, and SOD6	GO:0000303 response to superoxide | GO:0052059 evasion or tolerance by symbiont of host-produced reactive oxygen species |	GO:0004784 superoxide dismutase activity |	GO:0009986 cell surface | GO:0030445 yeast-form cell wall | GO:0009277 fungal-type cell wall | GO:0030446 hyphal cell wall |
orf19.2646	0.763803	0.617261	0.98816	0.954175		1.29374	Predicted zinc-finger protein of unknown function, not essential for viability	GO:0045944 positive regulation of transcription from RNA polymerase II promoter | GO:0009060 aerobic respiration |	GO:0003704 specific RNA polymerase II transcription factor activity |	GO:0005634 nucleus |
orf19.7106	0.728768	0.489365	0.942767	0.82404		1.29364	Predicted ORF in Assemblies 19, 20 and 21	GO:0006623 protein targeting to vacuole |
orf19.6351	0.851033	0.621682	1.10086	0.903117		1.29356	Predicted ORF in Assemblies 19, 20 and 21
orf19.5906	0.689411	0.291698	0.891765	0.581872	ADE2	1.29352	Phosphoribosylaminoimadazole carboxylase; enzyme of adenine biosynthesis; required for wild-type growth and virulence in immunosuppressed mouse systemic infection; not induced during GCN response, in contrast to S. cerevisiae ortholog	GO:0046084 adenine biosynthetic process | GO:0006164 purine nucleotide biosynthetic process | GO:0009405 pathogenesis |	GO:0004638 phosphoribosylaminoimidazole carboxylase activity |	GO:0005737 cytoplasm |
orf19.3954	0.929907	0.74208	1.20244	0.359433		1.29308	Predicted ORF in Assemblies 19, 20 and 21	GO:0006656 phosphatidylcholine biosynthetic process |	GO:0004609 phosphatidylserine decarboxylase activity |	GO:0000329 fungal-type vacuole membrane | GO:0000139 Golgi membrane |
orf19.2647	0.82908	0.413021	1.07206	0.847952		1.29307	Putative transcription factor with zinc cluster DNA-binding motif; caspofungin induced	GO:0045944 positive regulation of transcription from RNA polymerase II promoter | GO:0009060 aerobic respiration | GO:0006355 regulation of transcription, DNA-dependent |	GO:0003704 specific RNA polymerase II transcription factor activity | GO:0003700 transcription factor activity |	GO:0005634 nucleus |
orf19.2046	1.06437	0.562925	1.37586	0.219841	POT1-2	1.29266	Putative peroxisomal 3-ketoacyl CoA thiolase	GO:0006635 fatty acid beta-oxidation |	GO:0003988 acetyl-CoA C-acyltransferase activity |	GO:0005782 peroxisomal matrix |
orf19.3969	1.31106	0.618389	1.69457	0.448722		1.29252	Predicted ORF in Assemblies 19, 20 and 21	GO:0000122 negative regulation of transcription from RNA polymerase II promoter |	GO:0016566 specific transcriptional repressor activity |	GO:0000228 nuclear chromosome |
orf19.270	0.91096	0.410968	1.1771	0.794584		1.29215	Predicted ORF in Assemblies 19, 20 and 21
orf19.5416	1.03196	0.949491	1.33266	0.439668	ESA1	1.29139	Subunit of the NuA4 histone acetyltransferase complex	GO:0016573 histone acetylation | GO:0006354 RNA elongation | GO:0006281 DNA repair | GO:0000183 chromatin silencing at rDNA | GO:0051726 regulation of cell cycle | GO:0034401 chromatin organization during transcription | GO:0006357 regulation of transcription from RNA polymerase II promoter |	GO:0043166 H4/H2 histone acetyltransferase activity |	GO:0035267 NuA4 histone acetyltransferase complex | GO:0032777 Piccolo NuA4 histone acetyltransferase complex |
orf19.1725	1.04573	0.911674	1.35016	0.623675		1.29112	Predicted ORF in Assemblies 19, 20 and 21
orf19.2937	1.16842	0.559129	1.50842	0.374376	PMM1	1.291	Phosphomannomutase; enzyme of O- and N-linked mannosylation; interconverts mannose-6-phosphate and mannose-l-phosphate; functional homolog of S. cerevisiae Sec53p; antigenic during murine systemic infection	GO:0045047 protein targeting to ER |	GO:0004615 phosphomannomutase activity |	GO:0005625 soluble fraction | GO:0005829 cytosol |
orf19.7185	0.840584	0.526887	1.08518	0.797715		1.29099	Predicted ORF in Assemblies 19, 20 and 21	GO:0006348 chromatin silencing at telomere |	GO:0004406 H3/H4 histone acetyltransferase activity |	GO:0005634 nucleus | GO:0005737 cytoplasm |
orf19.3845	0.729675	0.57718	0.941953	0.888485	FGR3	1.29092	Protein lacking an ortholog in S. cerevisiae; transposon mutation affects filamentous growth	GO:0030447 filamentous growth |
orf19.6239	0.804801	0.493732	1.03887	0.888712		1.29084	Predicted ORF in Assemblies 19, 20 and 21	GO:0006367 transcription initiation from RNA polymerase II promoter | GO:0007070 negative regulation of transcription from RNA polymerase II promoter, mitotic | GO:0006468 protein amino acid phosphorylation | GO:0045944 positive regulation of transcription from RNA polymerase II promoter |	GO:0016251 general RNA polymerase II transcription factor activity | GO:0004693 cyclin-dependent protein kinase activity | GO:0008353 RNA polymerase II carboxy-terminal domain kinase activity |	GO:0005675 holo TFIIH complex |
orf19.5443	1.00676	0.983955	1.29886	0.544278		1.29013	Putative kynurenine 3-monooxygenase, involved in NAD biosynthesis; transposon mutation affects filamentous growth	GO:0030447 filamentous growth | GO:0034354 de novo NAD biosynthetic process from tryptophan |	GO:0004502 kynurenine 3-monooxygenase activity |	GO:0005741 mitochondrial outer membrane | GO:0005886 plasma membrane |
orf19.277	0.86734	0.0719046	1.11865	0.521916	THI6	1.28975	Putative thiamin-phosphate pyrophosphorylase, hydroxyethylthiazole kinase; fungal-specific (no human or murine homolog)	GO:0009228 thiamin biosynthetic process |	GO:0004789 thiamin-phosphate diphosphorylase activity | GO:0004417 hydroxyethylthiazole kinase activity |	GO:0005829 cytosol |
orf19.2487	1.0198	0.785511	1.31525	0.0968488		1.28971	Predicted ORF in Assemblies 19, 20 and 21			GO:0005634 nucleus | GO:0005737 cytoplasm |
orf19.434	1.1051	0.683183	1.42505	0.0420631	PRD1	1.28952	Transcription is regulated by Nrg1p, Mig1p, and Tup1p; Hog1p-induced	GO:0006508 proteolysis |	GO:0004222 metalloendopeptidase activity |	GO:0005758 mitochondrial intermembrane space |
orf19.6924	1.35804	0.43481	1.75112	0.0282379	HTA1	1.28945	Putative histone H2A; reduced mRNA abundance detected in homozygous fkh2 null mutant; amphotericin B repressed; farnesol regulated; RNA abundance regulated by tyrosol and cell density	GO:0006333 chromatin assembly or disassembly | GO:0045816 negative regulation of transcription from RNA polymerase II promoter, global | GO:0006281 DNA repair |	GO:0003677 DNA binding |	GO:0000786 nucleosome |
orf19.1149	0.656885	0.456626	0.846878	0.78953	MRF1	1.28923	Protein similar to mitochondrial respiratory proteins; increased transcription observed upon benomyl treatment; induced by farnesol, nitric oxide, core stress response; oxidative stress-induced via Cap1p	GO:0009060 aerobic respiration | GO:0007585 respiratory gaseous exchange |	GO:0003677 DNA binding |	GO:0005739 mitochondrion | GO:0005634 nucleus |
orf19.3237	0.882997	0.790048	1.13815	0.483008		1.28896	Predicted ORF in Assemblies 19, 20 and 21	GO:0000209 protein polyubiquitination | GO:0006513 protein monoubiquitination |	GO:0004842 ubiquitin-protein ligase activity |	GO:0005739 mitochondrion |
orf19.5580	0.888743	0.608734	1.14512	0.489882		1.28847	Predicted ORF in Assemblies 19, 20 and 21	GO:0007004 telomere maintenance via telomerase | GO:0006975 DNA damage induced protein phosphorylation | GO:0016572 histone phosphorylation | GO:0000729 DNA double-strand break processing |	GO:0004428 inositol or phosphatidylinositol kinase activity | GO:0042162 telomeric DNA binding | GO:0004672 protein kinase activity |	GO:0005739 mitochondrion |
orf19.7395	0.781661	0.471107	1.00711	0.738323		1.28843	Predicted ORF in Assemblies 19, 20 and 21
orf19.548	0.847323	0.323159	1.09109	0.688137	CDC10	1.28769	Septin, required for wild-type cell, hyphal, or chlamydospore morphology; role in virulence and kidney tissue invasion in a mouse model of systemic infection; forms ring at sites of cell division and filaments in mature chlamydospore	GO:0000910 cytokinesis | GO:0000921 septin ring assembly | GO:0030448 hyphal growth | GO:0006033 chitin localization | GO:0009405 pathogenesis | GO:0007120 axial cellular bud site selection | GO:0040023 establishment of nucleus localization | GO:0001410 chlamydospore formation | GO:0044406 adhesion to host | GO:0008105 asymmetric protein localization | GO:0031505 fungal-type cell wall organizatio…	GO:0000166 nucleotide binding | GO:0005200 structural constituent of cytoskeleton | GO:0005545 phosphatidylinositol binding | GO:0003924 GTPase activity |	GO:0000144 cellular bud neck septin ring | GO:0005940 septin ring | GO:0000131 incipient cellular bud site | GO:0005935 cellular bud neck | GO:0001411 hyphal tip | GO:0030428 cell septum | GO:0005938 cell cortex | GO:0043332 mating projection tip | GO:0001400 mating projection base | GO:0031105 septin complex |
orf19.7237	0.672551	0.3999	0.865999	0.593087		1.28763	Predicted ORF in Assemblies 19, 20 and 21	GO:0009435 NAD biosynthetic process |	GO:0004061 arylformamidase activity |
orf19.4893	0.856472	0.79756	1.10245	0.717935		1.2872	Protein not essential for viability
orf19.1449	0.912084	0.545039	1.17397	0.655107		1.28713	Increased transcription is observed in an azole-resistant strain that overexpresses MDR1; protein detected by mass spec in exponential and stationary phase cultures
orf19.7577	1.09481	0.516839	1.40884	0.540949	MSS51	1.28684	Putative mRNA maturation factor; fungal-specific (no human or murine homolog)	GO:0006412 translation | GO:0006397 mRNA processing | GO:0045727 positive regulation of translation |		GO:0019898 extrinsic to membrane | GO:0005759 mitochondrial matrix | GO:0005743 mitochondrial inner membrane |
orf19.4270	1.06992	0.659857	1.37664	0.0578915		1.28667	Predicted ORF in Assemblies 19, 20 and 21	GO:0006493 protein amino acid O-linked glycosylation |	GO:0000033 alpha-1,3-mannosyltransferase activity |
orf19.6078	0.951444	0.456778	1.22409	0.681355	POL93	1.28656	Predicted ORF in retrotransposon Tca8 with similarity to the Pol region of retrotransposons encoding reverse transcriptase, protease and integrase; downregulated in response to ciclopirox olamine; induced upon biofilm formation
orf19.4969	0.836846	0.76757	1.07661	0.926436	KEM1	1.2865	5'-->3' exoribonuclease; required for wild-type filamentous growth; not essential for viability; functionally complements S. cerevisiae kem1 mutant slow growth & mating and partially complements invasive growth & pseudohyphal growth	GO:0030448 hyphal growth | GO:0006402 mRNA catabolic process | GO:0042493 response to drug | GO:0042710 biofilm formation | GO:0000742 karyogamy during conjugation with cellular fusion | GO:0007089 traversing start control point of mitotic cell cycle |	GO:0000150 recombinase activity | GO:0008017 microtubule binding | GO:0004534 5'-3' exoribonuclease activity |	GO:0000932 cytoplasmic mRNA processing body |
orf19.4105	1.13577	0.0372635	1.46109	0.142657		1.28644	Predicted ORF in Assemblies 19, 20 and 21	GO:0045132 meiotic chromosome segregation |
orf19.7274	0.849749	0.0451127	1.09306	0.11416		1.28633	Predicted ORF in retrotransposon Zorro2 with similarity to retroviral reverse transcriptase proteins
orf19.3806	0.963689	0.754727	1.23962	0.587216		1.28633	Predicted ORF in Assemblies 19, 20 and 21
orf19.5956	0.831543	0.625976	1.06959	0.868055		1.28628	Predicted ORF in Assemblies 19, 20 and 21	GO:0030036 actin cytoskeleton organization |		GO:0005634 nucleus | GO:0005737 cytoplasm |
orf19.6813	0.349767	0.4951	0.449819	0.413584		1.28605	Predicted ORF in Assemblies 19, 20 and 21; possibly spurious ORF (Annotation Working Group prediction)
orf19.6225	0.987956	0.961676	1.27021	0.407422	PCL7	1.2857	Protein described as cyclin-like, possible Pho85p cyclin; hyphal downregulated; transcriptionally activated by Mnl1p under weak acid stress	GO:0005981 regulation of glycogen catabolic process | GO:0000079 regulation of cyclin-dependent protein kinase activity | GO:0005979 regulation of glycogen biosynthetic process | GO:0031647 regulation of protein stability |	GO:0016538 cyclin-dependent protein kinase regulator activity |	GO:0005634 nucleus | GO:0000307 cyclin-dependent protein kinase holoenzyme complex |
orf19.3211	0.804714	0.666617	1.03461	0.95608	RCF3	1.28569	Transcription is induced upon filamentous growth	GO:0006298 mismatch repair | GO:0006272 leading strand elongation | GO:0007062 sister chromatid cohesion |	GO:0003689 DNA clamp loader activity | GO:0016887 ATPase activity |	GO:0005634 nucleus | GO:0031391 Elg1 RFC-like complex | GO:0031390 Ctf18 RFC-like complex | GO:0031389 Rad17 RFC-like complex | GO:0005663 DNA replication factor C complex |
orf19.4727	0.911692	0.822453	1.17182	0.600456		1.28532	Predicted ORF in Assemblies 19, 20 and 21	GO:0030437 ascospore formation | GO:0045944 positive regulation of transcription from RNA polymerase II promoter |		GO:0005739 mitochondrion |
orf19.6986	0.856986	0.627146	1.1015	0.744455		1.28532	Predicted ORF in Assemblies 19, 20 and 21
orf19.6199	0.839673	0.661773	1.07904	0.860782		1.28507	Predicted ORF in Assemblies 19, 20 and 21; intron in 5'-UTR	GO:0006273 lagging strand elongation |	GO:0043141 ATP-dependent 5'-3' DNA helicase activity |	GO:0005658 alpha DNA polymerase | GO:0033203 DNA helicase A complex |
orf19.3363	1.60604	0.0356032	2.06338	0.380177	VTC4	1.28476	Protein described as polyphosphate synthetase; decreased expression in hyphae compared to yeast-form cells; fungal-specific (no human or murine homolog); virulence-group-correlated expression	GO:0016237 microautophagy | GO:0007034 vacuolar transport | GO:0042144 vacuole fusion, non-autophagic |		GO:0033254 vacuolar transporter chaperone complex | GO:0031310 intrinsic to vacuolar membrane | GO:0005783 endoplasmic reticulum |
orf19.7455	0.874281	0.681856	1.12238	0.485985		1.28377	Predicted ORF in Assemblies 19, 20 and 21
orf19.2229	0.78115	0.0263114	1.00279	0.973663		1.28374	Predicted ORF in Assemblies 19, 20 and 21
orf19.173	0.889292	0.670488	1.14154	0.219783		1.28366	Putative transcription factor with zinc finger DNA-binding motif; transcriptionally activated by Mnl1p under weak acid stress	GO:0009743 response to carbohydrate stimulus | GO:0006355 regulation of transcription, DNA-dependent |	GO:0016563 transcription activator activity | GO:0003700 transcription factor activity |	GO:0005634 nucleus |
orf19.426	1.0238	0.943661	1.31388	0.394116		1.28333	Predicted ORF in Assemblies 19, 20 and 21
orf19.4728	0.871975	0.650256	1.11876	0.90153		1.28301	Predicted ORF in Assemblies 19, 20 and 21	GO:0016575 histone deacetylation | GO:0045835 negative regulation of meiosis |	GO:0045129 NAD-independent histone deacetylase activity | GO:0017136 NAD-dependent histone deacetylase activity |	GO:0034967 Set3 complex |
orf19.192	0.948732	0.943568	1.2165	0.529694		1.28223	Predicted ORF in Assemblies 19, 20 and 21
orf19.7108	0.69444	0.379097	0.890381	0.566058	RPE1	1.28216	Predicted ORF in Assemblies 19, 20 and 21; protein detected by mass spec in stationary phase cultures	GO:0006098 pentose-phosphate shunt |	GO:0004750 ribulose-phosphate 3-epimerase activity |
orf19.5296	1.02211	0.786011	1.31008	0.560866		1.28174	Predicted ORF in Assemblies 19, 20 and 21	GO:0045727 positive regulation of translation | GO:0033617 mitochondrial respiratory chain complex IV assembly |		GO:0031305 integral to mitochondrial inner membrane |
orf19.5063	1.6713	0.560217	2.1417	0.553394		1.28146	Predicted ORF in Assemblies 19, 20 and 21; ciclopirox olamine induced; regulated by Ssn6p; induced by nitric oxide in yhb1 mutant
orf19.2905	0.90692	0.80298	1.1619	0.422828		1.28115	Predicted ORF in Assemblies 19, 20 and 21
orf19.7216	0.784815	0.546509	1.00516	0.991175		1.28076	Predicted ORF in Assemblies 19, 20 and 21	GO:0006897 endocytosis | GO:0006623 protein targeting to vacuole |	GO:0003924 GTPase activity |	GO:0005770 late endosome |
orf19.4266	0.91266	0.615188	1.16888	0.326018	SPR28	1.28074	Septin; similar to S. cerevisiae meiotic/sporulation septin; mutant has no obvious phenotype; two introns with noncanonical branch site and 5' splice site, respectively; splicing inhibited upon exposure to alpha-factor	GO:0000910 cytokinesis |	GO:0005200 structural constituent of cytoskeleton |	GO:0005940 septin ring |
orf19.771	0.769852	0.521028	0.985518	0.936416	LPG20	1.28014	Protein of aldo-keto reductase family; nonessential; similar to aryl alcohol dehydrogenases, S. cerevisiae Ypl088wp, A. tumefaciens MocA; osmotic stress-induced, correlates with overexpression of MDR1 in fluconazole-resistant isolate	GO:0006081 cellular aldehyde metabolic process |	GO:0018456 aryl-alcohol dehydrogenase activity |
orf19.2038	0.863189	0.182973	1.10484	0.697716		1.27995	Predicted ORF in Assemblies 19, 20 and 21
orf19.4628	1.0245	0.83524	1.31109	0.522976		1.27973	Putative protein of unknown function; heterozygous null mutant exhibits hypersensitivity to parnafungin and cordycepin in the C. albicans fitness test; predicted ORF in Assemblies 19, 20 and 21	GO:0006379 mRNA cleavage | GO:0006378 mRNA polyadenylation | GO:0042493 response to drug |		GO:0005847 mRNA cleavage and polyadenylation specificity factor complex |
orf19.3292	0.735864	0.00245076	0.941641	0.959113		1.27964	Predicted ORF in Assemblies 19, 20 and 21	GO:0006979 response to oxidative stress |	GO:0000318 protein-methionine-R-oxide reductase activity | GO:0033743 peptide-methionine (R)-S-oxide reductase activity |
orf19.2675	0.977367	0.896769	1.2503	0.394064		1.27925	Predicted ORF in Assemblies 19, 20 and 21	GO:0000245 spliceosome assembly |	GO:0003729 mRNA binding | GO:0031202 RNA splicing factor activity, transesterification mechanism |	GO:0005686 U2 snRNP |
orf19.5673	0.974927	0.907889	1.24676	0.604029	OPT7	1.27882	Putative oligopeptide transporter; possibly transports GSH and related compounds; induced upon biofilm formation; Hog1p-induced; expression of OPT6, -7, or -8 does not suppress defect of mutant lacking Opt1p, -2p, or -3p; fungal-specific	GO:0006857 oligopeptide transport |	GO:0015198 oligopeptide transporter activity |
orf19.1745	0.882123	0.47045	1.12777	0.648302		1.27847	Predicted ORF in Assemblies 19, 20 and 21; possibly spurious ORF (Annotation Working Group prediction)
orf19.6802	1.03051	0.700918	1.31705	0.574286		1.27805	Predicted ORF in Assemblies 19, 20 and 21	GO:0018318 protein amino acid palmitoylation | GO:0042144 vacuole fusion, non-autophagic |	GO:0019706 protein-cysteine S-palmitoleyltransferase activity |	GO:0000329 fungal-type vacuole membrane |
orf19.450	0.944701	0.322	1.20699	0.551424		1.27765	Predicted ORF in Assemblies 19, 20 and 21
orf19.7279	0.810686	0.679521	1.03568	0.9381		1.27753	Predicted ORF in Assemblies 19, 20 and 21
orf19.880	0.900958	0.318991	1.15053	0.796755		1.277	Predicted ORF in Assemblies 19, 20 and 21	GO:0006888 ER to Golgi vesicle-mediated transport |		GO:0043332 mating projection tip | GO:0000300 peripheral to membrane of membrane fraction | GO:0030127 COPII vesicle coat | GO:0005783 endoplasmic reticulum |
orf19.2831	0.773681	0.0534852	0.987793	0.810845	RPC31	1.27675	Predicted ORF in Assemblies 19, 20 and 21; repressed by nitric oxide; induced during infection of murine kidney, compared to growth in vitro; has murine homolog	GO:0006383 transcription from RNA polymerase III promoter |	GO:0003899 DNA-directed RNA polymerase activity |	GO:0005666 DNA-directed RNA polymerase III complex |
orf19.3607	0.765703	0.551808	0.97738	0.95656		1.27645	Predicted ORF in Assemblies 19, 20 and 21
orf19.3459	0.973504	0.871543	1.24216	0.513557		1.27597	Predicted ORF in Assemblies 19, 20 and 21	GO:0007126 meiosis | GO:0030437 ascospore formation | GO:0006468 protein amino acid phosphorylation | GO:0000070 mitotic sister chromatid segregation | GO:0006303 double-strand break repair via nonhomologous end joining |	GO:0004712 protein serine/threonine/tyrosine kinase activity |	GO:0005625 soluble fraction |
orf19.332.1	1.05651	0.667174	1.34771	0.456286		1.27563	ORF added to Assembly 21 based on comparative genome analysis
orf19.4530.1	0.985414	0.824219	1.25699	0.100539		1.27559	ORF Predicted by Annotation Working Group; regulated by Nrg1p, Tup1p
orf19.444	1.04163	0.882184	1.32706	0.517856		1.27402	Predicted ORF in Assemblies 19, 20 and 21	GO:0006397 mRNA processing |	GO:0003676 nucleic acid binding |	GO:0030530 heterogeneous nuclear ribonucleoprotein complex | GO:0005737 cytoplasm |
orf19.5219	0.906599	0.423365	1.15501	0.711025	IRA2	1.274	Predicted ORF in Assemblies 19, 20 and 21	GO:0007265 Ras protein signal transduction | GO:0030818 negative regulation of cAMP biosynthetic process | GO:0006950 response to stress | GO:0032320 positive regulation of Ras GTPase activity | GO:0046580 negative regulation of Ras protein signal transduction |	GO:0005099 Ras GTPase activator activity |	GO:0005739 mitochondrion |
orf19.4424	0.838544	0.599667	1.06771	0.897635	PHO100	1.27329	Putative inducible acid phosphatase; DTT-extractable and observed in culture supernatant under low-phosphate conditions; slight effect on murine virulence; induced on biofilm formation; virulence-group-correlated expression; N-glycosylated	GO:0009405 pathogenesis |	GO:0003993 acid phosphatase activity |	GO:0030287 cell wall-bounded periplasmic space | GO:0009986 cell surface | GO:0005576 extracellular region |
orf19.1179	0.924414	0.41558	1.17688	0.422688		1.27311	Transcriptionally regulated by iron; expression greater in high iron; possibly subject to Kex2p processing
orf19.2476	0.824839	0.396664	1.05001	0.877207		1.27299	Predicted ORF in Assemblies 19, 20 and 21	GO:0007047 cell wall organization |		GO:0070211 Snt2C complex |
orf19.6016	0.992322	0.949787	1.26321	0.230787		1.27298	Predicted ORF in Assemblies 19, 20 and 21	GO:0000001 mitochondrion inheritance | GO:0016192 vesicle-mediated transport |	GO:0003924 GTPase activity |	GO:0016021 integral to membrane | GO:0005741 mitochondrial outer membrane |
orf19.5893	1.11797	0.787232	1.42273	0.124884	RIP1	1.2726	Protein described as subunit of ubiquinol cytochrome c-reductase; transcriptionally regulated by iron; expression greater in high iron; alkaline downregulated; repressed by nitric oxide	GO:0006122 mitochondrial electron transport, ubiquinol to cytochrome c | GO:0009060 aerobic respiration |	GO:0008121 ubiquinol-cytochrome-c reductase activity |	GO:0005750 mitochondrial respiratory chain complex III | GO:0005886 plasma membrane |
orf19.3368	0.95026	0.367213	1.20927	0.562274		1.27257	Predicted ORF in Assemblies 19, 20 and 21
orf19.2117	1.04919	0.564681	1.33475	0.510415	LEU5	1.27217	Predicted ORF in Assemblies 19, 20 and 21; transcription is upregulated in both intermediate and mature biofilms	GO:0015880 coenzyme A transport |	GO:0015228 coenzyme A transmembrane transporter activity |	GO:0005743 mitochondrial inner membrane |
orf19.6824	0.962087	0.821362	1.22381	0.0735667		1.27203	Predicted ORF in Assemblies 19, 20 and 21; appears to be C. albicans-specific; induced upon biofilm formation; transcription is repressed in response to alpha pheromone in SpiderM medium
orf19.352	0.869434	0.740758	1.10593	0.858081		1.27201	Predicted ORF in Assemblies 19, 20 and 21
orf19.6887	1.026	0.643322	1.30499	0.550515		1.27192	Predicted ORF from Assembly 19; repressed by nitric oxide; removed from Assembly 20; subsequently reinstated in Assembly 21 based on comparative genome analysis
orf19.704	0.736765	0.111757	0.937041	0.529078	SOL3	1.27183	Predicted ORF in Assemblies 19, 20 and 21; macrophage-downregulated protein abundance; protein detected by mass spec in exponential and stationary phase cultures	GO:0008033 tRNA processing |	GO:0017057 6-phosphogluconolactonase activity |	GO:0005634 nucleus | GO:0005737 cytoplasm |
orf19.1990	0.903138	0.100869	1.14827	0.0538706	SNX4	1.27142	Protein induced during the mating process	GO:0034727 piecemeal microautophagy of nucleus | GO:0032258 CVT pathway | GO:0034498 early endosome to Golgi transport |	GO:0032266 phosphatidylinositol 3-phosphate binding |	GO:0016020 membrane | GO:0005829 cytosol | GO:0000300 peripheral to membrane of membrane fraction | GO:0005769 early endosome | GO:0000407 pre-autophagosomal structure |
orf19.382	0.845523	0.191021	1.07482	0.629611	TEF2	1.27119	Translation elongation factor 1-alpha; genes encoding ribosomal subunits, translation factors, and tRNA synthetases are downregulated upon phagocytosis by murine macrophage	GO:0006414 translational elongation |	GO:0003746 translation elongation factor activity |	GO:0005840 ribosome |
orf19.7473	0.991979	0.985022	1.2608	0.460155		1.271	Predicted ORF in Assemblies 19, 20 and 21
orf19.592	1.0188	0.926558	1.29467	0.532051		1.27078	Predicted ORF in Assemblies 19, 20 and 21
orf19.4482	0.831931	0.208835	1.05707	0.471394	IFI3	1.27063	Predicted ORF in Assemblies 19, 20 and 21; constitutive expression independent of MTL or white-opaque status
orf19.1313	1.05565	0.474734	1.34133	0.168041	CDR3	1.27062	Transporter of the Pdrp/Cdrp family of the ATP-binding cassette (ABC) superfamily; transports phospholipids in an out-to-in direction; expressed in opaque-phase cells; induced by macrophage interaction; fluconazole-downregulated	GO:0046618 drug export | GO:0045332 phospholipid translocation | GO:0006810 transport |	GO:0005215 transporter activity | GO:0042626 ATPase activity, coupled to transmembrane movement of substances | GO:0005548 phospholipid transporter activity | GO:0008559 xenobiotic-transporting ATPase activity | GO:0005524 ATP binding |	GO:0016021 integral to membrane | GO:0005886 plasma membrane |
orf19.91	1.00585	0.963994	1.2778	0.216981		1.27037	Predicted ORF in Assemblies 19, 20 and 21
orf19.4107	0.949086	0.865493	1.2056	0.612708		1.27028	Predicted ORF in Assemblies 19, 20 and 21	GO:0006798 polyphosphate catabolic process |	GO:0004309 exopolyphosphatase activity |	GO:0005737 cytoplasm |
orf19.135	0.863639	0.567287	1.09695	0.626152		1.27014	Predicted ORF in Assemblies 19, 20 and 21	GO:0007121 bipolar cellular bud site selection | GO:0006906 vesicle fusion | GO:0048278 vesicle docking | GO:0006893 Golgi to plasma membrane transport | GO:0006887 exocytosis | GO:0000245 spliceosome assembly |	GO:0005515 protein binding |	GO:0030478 actin cap | GO:0043332 mating projection tip | GO:0005934 cellular bud tip | GO:0000145 exocyst | GO:0005935 cellular bud neck | GO:0000131 incipient cellular bud site |
orf19.1479	0.991633	0.976447	1.25907	0.19651		1.2697	Predicted ORF in Assemblies 19, 20 and 21			GO:0005739 mitochondrion |
orf19.7483	0.93205	0.174157	1.18312	0.146023	CRM1	1.26938	Functional homolog of S. cerevisiae Crm1p, which acts in protein nuclear export; predicted to be resistant to antifungal drug leptomycin B; partially suppresses signal transduction defects of S. cerevisiae ste20 mutant	GO:0006611 protein export from nucleus | GO:0034501 protein localization to kinetochore | GO:0000055 ribosomal large subunit export from nucleus | GO:0006406 mRNA export from nucleus |	GO:0005049 nuclear export signal receptor activity | GO:0008320 protein transmembrane transporter activity |	GO:0000776 kinetochore | GO:0005634 nucleus | GO:0005816 spindle pole body |
orf19.5968	0.885356	0.678574	1.1238	0.716376	RDI1	1.26932	Protein similar to S. cerevisiae Rdi1p, an inhibitor of Rho-GDP dissociation; transposon mutation affects filamentous growth; farnesol-, filament-induced; regulated by Nrg1p, Tup1p	GO:0030447 filamentous growth | GO:0030448 hyphal growth | GO:0007015 actin filament organization | GO:0007264 small GTPase mediated signal transduction |	GO:0004871 signal transducer activity | GO:0005094 Rho GDP-dissociation inhibitor activity |	GO:0005737 cytoplasm | GO:0005934 cellular bud tip | GO:0005829 cytosol | GO:0001950 plasma membrane enriched fraction | GO:0005935 cellular bud neck |
[truncated: 4,907 more rows]
