# Supplementary material for: A novel genetic circuitry governing hypoxic metabolic flexibility, commensalism and virulence in the fungal pathogen Candida albicans
Source: PLoS Pathog. 2019 Dec 6;15(12):e1007823. doi: 10.1371/journal.ppat.1007823 (PMC6919631; doi:10.1371/journal.ppat.1007823)
Supplement: S4 Table — (XLSX) [file ppat.1007823.s007.xlsx]

## Sheet: Legend
Table S4
Description
Gene Stet Enrichment Analysis (GSEA) of the snf5 transcriptome.
SIZE: Number of genes in gene set
NES: Normalized Enrichment Score
NOM p-val: Normalized p-value
FDR q-val: False Discovery Rate q-value

## Sheet: GSEA negative correlation
	NAME	SIZE	ES	NES	NOM p-val	FDR q-val	FWER p-val	RANK AT MAX	LEADING EDGE
	SWI4SWI6_UP	427	-0.402942	-9.35642	0	0	0	1412	tags=59%, list=22%, signal=71%
	RHE90_UP	216	-0.552101	-9.14277	0	0	0	830	tags=66%, list=13%, signal=73%
	BMDM PHAGOCYTOSIS_UP	468	-0.360966	-8.62947	0	0	0	902	tags=47%, list=14%, signal=51%
	SKO1_UP	447	-0.358614	-8.42576	0	0	0	1919	tags=63%, list=30%, signal=84%
	HYPHAE_UP	198	-0.455805	-7.37225	0	0	0	1583	tags=69%, list=25%, signal=88%
	CLA37_UP	155	-0.494329	-7.0463	0	0	0	1218	tags=67%, list=19%, signal=81%
	RHE30_UP	176	-0.458302	-7.02965	0	0	0	1488	tags=68%, list=23%, signal=85%
	GI COLONIZATION-UP	408	-0.27876	-6.27098	0	0	0	1100	tags=43%, list=17%, signal=49%
	HYPHAE_SPIDER_UP	198	-0.388802	-6.2499	0	0	0	1448	tags=60%, list=22%, signal=75%
	OS(2006)_UP	203	-0.360805	-6.02594	0	0	0	1116	tags=52%, list=17%, signal=61%
	XS(2006)_UP	458	-0.225181	-5.40081	0	0	0	1385	tags=42%, list=21%, signal=50%
	KETOCONAZOLE_UP	198	-0.3181	-5.26053	0	0	0	521	tags=39%, list=8%, signal=41%
	YAK1_Y_DN	202	-0.317954	-5.25122	0	0	0	1656	tags=56%, list=26%, signal=74%
	GLD_UP	264	-0.275664	-5.12459	0	0	0	1571	tags=51%, list=24%, signal=64%
	CAP2_DN	311	-0.251968	-5.12013	0	0	0	1608	tags=49%, list=25%, signal=62%
	CLA30_UP	88	-0.451191	-4.95741	0	0	0	796	tags=57%, list=12%, signal=64%
	CDC53_DN	232	-0.284167	-4.93317	0	0	0	709	tags=38%, list=11%, signal=42%
	RTG1-RTG3-BOUND- PEREZ	265	-0.247816	-4.58883	0	0	0	903	tags=38%, list=14%, signal=42%
	GAL4_UP	254	-0.252367	-4.57939	0	0	0	2223	tags=59%, list=34%, signal=86%
	XS(HOG1)_UP	485	-0.185867	-4.54361	0	0	0	1021	tags=33%, list=16%, signal=36%
	MICROBODY_CEL	48	-0.538936	-4.48448	0	0	0	1255	tags=73%, list=19%, signal=90%
	MED31_DN	123	-0.340323	-4.43249	0	0	0	995	tags=49%, list=15%, signal=57%
	PEROXISOME_CEL	48	-0.538936	-4.43056	0	0	0	1255	tags=73%, list=19%, signal=90%
	CCR4_DN	124	-0.337197	-4.30301	0	0	0	1198	tags=52%, list=19%, signal=62%
	HYPOXIA_SYNNOTT_UP	243	-0.235583	-4.21402	0	0	0	955	tags=37%, list=15%, signal=42%
	OS_UP	174	-0.270356	-4.21256	0	0	0	1308	tags=47%, list=20%, signal=57%
	CARBOHYDRATE METABOLIC PROCESS_BIO	160	-0.291487	-4.14815	0	0	0	1878	tags=58%, list=29%, signal=79%
	ZAP1_DN	270	-0.219614	-4.11624	0	0	0	1727	tags=48%, list=27%, signal=62%
	CYR1_HYPHAE_UP	357	-0.186354	-4.00062	0	0	0	709	tags=29%, list=11%, signal=30%
	RAS1_YEAST_UP	68	-0.401967	-3.93212	0	0	0	1041	tags=56%, list=16%, signal=66%
	LATE BIOFILM_UP	61	-0.424356	-3.90813	0	0	0	674	tags=52%, list=10%, signal=58%
	BIOFILMBATCH_UP	207	-0.236138	-3.90159	0	0	0	615	tags=32%, list=10%, signal=35%
	CDC5_7H_UP	397	-0.172448	-3.8692	0	0	0	810	tags=29%, list=13%, signal=31%
	SCH9-DO_HPX	81	-0.376227	-3.86813	0	0	0	711	tags=48%, list=11%, signal=53%
	OS(HOG1)_UP	84	-0.360864	-3.85573	0	0	0	1237	tags=55%, list=19%, signal=67%
	HU_6H_UP	251	-0.208606	-3.82871	0	0	0	2359	tags=57%, list=37%, signal=86%
	ENERGY DERIVATION BY OXIDATION OF ORGANIC COMPOUNDS_BIO	109	-0.3062	-3.79839	0	0	0	1789	tags=58%, list=28%, signal=79%
	GENERATION OF PRECURSOR METABOLITES AND ENERGY_BIO	128	-0.291324	-3.79693	0	0	0	1789	tags=56%, list=28%, signal=76%
	UPC2_UP	262	-0.201761	-3.79542	0	0	0	969	tags=34%, list=15%, signal=39%
	AMINO ACID CATABOLIC PROCESS_BIO	26	-0.603505	-3.73324	0	0	0	590	tags=69%, list=9%, signal=76%
	MICROBODY PART_CEL	33	-0.522795	-3.68098	0	0	0	1534	tags=76%, list=24%, signal=99%
	PEROXISOMAL PART_CEL	33	-0.522795	-3.676	0	0	0	1534	tags=76%, list=24%, signal=99%
	CELLULAR CARBOHYDRATE METABOLIC PROCESS_BIO	142	-0.271574	-3.67334	0	0	0	1878	tags=56%, list=29%, signal=77%
	TYE7-DOWN	157	-0.248633	-3.66026	0	0	0	861	tags=38%, list=13%, signal=42%
	CUP2P_TFMOTIF	85	-0.335759	-3.6556	0	0	0	900	tags=47%, list=14%, signal=54%
	CELLULAR CATABOLIC PROCESS_BIO	234	-0.205318	-3.62835	0	0	0	1179	tags=38%, list=18%, signal=45%
	OXIDOREDUCTASE ACTIVITY_MOL	246	-0.200365	-3.60087	0	0	0	830	tags=32%, list=13%, signal=35%
	AMINE CATABOLIC PROCESS_BIO	27	-0.57785	-3.55637	0	0	0	590	tags=67%, list=9%, signal=73%
	TYE7-UP-HPX	246	-0.197659	-3.5283	0	0	0	1083	tags=36%, list=17%, signal=41%
	PEROXISOMAL MATRIX_CEL	24	-0.575715	-3.47265	0	0	0	333	tags=63%, list=5%, signal=66%
	NITROGEN COMPOUND CATABOLIC PROCESS_BIO	31	-0.524187	-3.46922	0	0	0	590	tags=61%, list=9%, signal=67%
	HYPHAE FBS37 (NANTEL)_DN	74	-0.332421	-3.38422	0	0	0	933	tags=47%, list=14%, signal=55%
	PMN PHAGOCYTOSIS_UP	189	-0.213927	-3.37995	0	0	0	744	tags=32%, list=12%, signal=35%
	SCH9-UP_NORMOX	58	-0.374551	-3.36998	0	0	0	610	tags=47%, list=9%, signal=51%
	MITOCHONDRIAL PART_CEL	267	-0.174309	-3.3268	0	0	0	3468	tags=70%, list=54%, signal=146%
	VESICLE-MEDIATED TRANSPORT_BIO	203	-0.203927	-3.32401	0	1.60432e-05	0.001	2574	tags=60%, list=40%, signal=96%
	PROTEASOME REGULATORY PARTICLE (SENSU EUKARYOTA)_CEL	21	-0.60293	-3.32149	0	1.57618e-05	0.001	1040	tags=76%, list=16%, signal=91%
	PRE6_BIND	41	-0.438043	-3.32041	0	1.549e-05	0.001	1285	tags=63%, list=20%, signal=79%
	HS_UP	162	-0.222746	-3.31926	0	1.52275e-05	0.001	1030	tags=38%, list=16%, signal=44%
	HMS1-BOUND-PEREZ	92	-0.293574	-3.28541	0	1.49737e-05	0.001	1080	tags=46%, list=17%, signal=54%
	HYPOXIA_SYNNOTT_DN	163	-0.225196	-3.27815	0	1.47282e-05	0.001	1594	tags=47%, list=25%, signal=60%
	MITOCHONDRION_CEL	379	-0.147729	-3.25151	0	1.44906e-05	0.001	3447	tags=67%, list=53%, signal=136%
	CATABOLIC PROCESS_BIO	254	-0.179763	-3.19593	0	1.42606e-05	0.001	1072	tags=34%, list=17%, signal=39%
	PUP2_BIND	38	-0.42608	-3.18474	0	1.40378e-05	0.001	1174	tags=61%, list=18%, signal=74%
	PRE8_BIND	32	-0.476922	-3.16297	0	1.38218e-05	0.001	1174	tags=66%, list=18%, signal=80%
	PUP1_BIND	32	-0.476922	-3.14787	0	1.36124e-05	0.001	1174	tags=66%, list=18%, signal=80%
	TAC1_DN	55	-0.358333	-3.14015	0	1.34093e-05	0.001	994	tags=51%, list=15%, signal=60%
	HAP1P_TFMOTIF	111	-0.25897	-3.13731	0	1.32121e-05	0.001	568	tags=34%, list=9%, signal=37%
	WHITE_UP	105	-0.258128	-3.10142	0	1.30206e-05	0.001	1067	tags=42%, list=17%, signal=49%
	PRE10_BIND	39	-0.410532	-3.09016	0	1.28346e-05	0.001	1174	tags=59%, list=18%, signal=72%
	AEROBIC RESPIRATION_BIO	68	-0.323539	-3.07904	0	1.26538e-05	0.001	3156	tags=81%, list=49%, signal=157%
	PROTEASOME COMPLEX (SENSU EUKARYOTA)_CEL	43	-0.402384	-3.06816	0	1.24781e-05	0.001	1174	tags=58%, list=18%, signal=71%
	PRE5_BIND	39	-0.410532	-3.06802	0	1.23071e-05	0.001	1174	tags=59%, list=18%, signal=72%
	CDC5_2H_DN	65	-0.323891	-3.05695	0	1.21408e-05	0.001	1308	tags=52%, list=20%, signal=65%
	SCL1_BIND	38	-0.42608	-3.05309	0	1.19789e-05	0.001	1174	tags=61%, list=18%, signal=74%
	IME1P_TFMOTIF	413	-0.131612	-3.03568	0	2.38004e-05	0.002	1910	tags=42%, list=30%, signal=56%
	CELLULAR RESPIRATION_BIO	69	-0.311741	-3.02116	0	3.51415e-05	0.003	3156	tags=80%, list=49%, signal=154%
	PRE2_BIND	33	-0.451658	-3.01637	0	3.4691e-05	0.003	1404	tags=67%, list=22%, signal=85%
	HU_2H_UP	153	-0.203647	-3.00437	0	4.565e-05	0.004	996	tags=35%, list=15%, signal=41%
	SAK1-UP	357	-0.137958	-2.98831	0	6.7878e-05	0.006	968	tags=28%, list=15%, signal=31%
	POST-GOLGI VESICLE-MEDIATED TRANSPORT_BIO	44	-0.378778	-2.97866	0	6.704e-05	0.006	2561	tags=77%, list=40%, signal=127%

## Sheet: GSEA positive correlation
	NAME	SIZE	ES	NES	NOM p-val	FDR q-val	FWER p-val	RANK AT MAX	LEADING EDGE
	SWI4SWI6_DN	407	0.411692	9.39667	0	0	0	1506	tags=62%, list=23%, signal=76%
	UPC2_DN	263	0.491747	8.8527	0	0	0	1544	tags=71%, list=24%, signal=90%
	SKO1_DN	496	0.347245	8.74993	0	0	0	2433	tags=70%, list=38%, signal=103%
	XS(2006)_DN	456	0.332465	8.1373	0	0	0	2110	tags=64%, list=33%, signal=88%
	HS_DN	227	0.444663	7.67047	0	0	0	1865	tags=72%, list=29%, signal=97%
	OS(2006)_DN	209	0.431664	7.30224	0	0	0	1905	tags=71%, list=30%, signal=98%
	HYPHAE_SPIDER_DN	322	0.34822	7.05402	0	0	0	2294	tags=69%, list=36%, signal=101%
	NUCLEOLUS_CEL	111	0.571623	7.0278	0	0	0	1374	tags=77%, list=21%, signal=97%
	RIBOSOME BIOGENESIS AND ASSEMBLY_BIO	154	0.465902	6.72324	0	0	0	1842	tags=74%, list=29%, signal=101%
	CAP2_UP	411	0.293909	6.53252	0	0	0	1898	tags=57%, list=29%, signal=76%
	RIBONUCLEOPROTEIN COMPLEX BIOGENESIS AND ASSEMBLY_BIO	196	0.404013	6.51328	0	0	0	2246	tags=74%, list=35%, signal=110%
	RPL3_BIND	134	0.446595	6.01203	0	0	0	1849	tags=72%, list=29%, signal=99%
	RPL5_BIND	93	0.538405	5.94207	0	0	0	1849	tags=82%, list=29%, signal=113%
	CDC5_7H_DN	362	0.27571	5.87994	0	0	0	1743	tags=53%, list=27%, signal=69%
	RRNA METABOLIC PROCESS_BIO	99	0.500188	5.70838	0	0	0	1645	tags=75%, list=25%, signal=99%
	RRNA PROCESSING_BIO	96	0.503263	5.7071	0	0	0	1842	tags=78%, list=29%, signal=108%
	OS_DN	220	0.340585	5.70591	0	0	0	2453	tags=71%, list=38%, signal=110%
	HYPHAE_DN	230	0.323208	5.6651	0	0	0	2141	tags=64%, list=33%, signal=93%
	RHE30_DN	267	0.304845	5.65097	0	0	0	1836	tags=58%, list=28%, signal=77%
	SIT4_HYPHAE_DN	99	0.484639	5.53758	0	0	0	1483	tags=71%, list=23%, signal=90%
	XS_DN	240	0.302574	5.33604	0	0	0	1669	tags=55%, list=26%, signal=71%
	NUCLEOLAR PART_CEL	48	0.63647	5.27651	0	0	0	1166	tags=81%, list=18%, signal=98%
	CYR1_YEAST_DN	296	0.270121	5.23523	0	0	0	2261	tags=61%, list=35%, signal=89%
	RPL7B_BIND	78	0.494537	5.15135	0	0	0	1811	tags=77%, list=28%, signal=106%
	RNA PROCESSING_BIO	228	0.297637	5.10286	0	0	0	2421	tags=66%, list=38%, signal=102%
	HYPHAE FBS37 (NANTEL)_UP	129	0.386652	5.0716	0	0	0	1156	tags=56%, list=18%, signal=67%
	CLA37_DN	141	0.364714	5.00104	0	0	0	672	tags=46%, list=10%, signal=50%
	BRX1_BIND	69	0.523176	4.96165	0	0	0	1710	tags=78%, list=26%, signal=105%
	RPL20A_BIND	96	0.428145	4.95433	0	0	0	1849	tags=71%, list=29%, signal=98%
	RLP7_BIND	62	0.524938	4.94675	0	0	0	1849	tags=81%, list=29%, signal=112%
	RPS7A_BIND	100	0.42207	4.9102	0	0	0	2352	tags=78%, list=36%, signal=121%
	KETOCONAZOLE_DN	151	0.344603	4.87409	0	0	0	1888	tags=63%, list=29%, signal=87%
	HAS1_BIND	99	0.420887	4.87006	0	0	0	1497	tags=65%, list=23%, signal=83%
	RPL25_BIND	98	0.429939	4.86632	0	0	0	1811	tags=70%, list=28%, signal=96%
	NOC4_BIND	42	0.63818	4.85587	0	0	0	1132	tags=81%, list=18%, signal=98%
	KRE33_BIND	77	0.466863	4.839	0	0	0	1800	tags=74%, list=28%, signal=101%
	NOG1_BIND	88	0.439085	4.83486	0	0	0	2265	tags=78%, list=35%, signal=119%
	TIF6_BIND	68	0.498103	4.73091	0	0	0	1849	tags=78%, list=29%, signal=108%
	HU_6H_DN	126	0.353457	4.67589	0	0	0	1502	tags=58%, list=23%, signal=74%
	NRG1_TF	162	0.312332	4.67525	0	0	0	1580	tags=55%, list=24%, signal=71%
	RPL17A_BIND	70	0.466158	4.65297	0	0	0	1818	tags=74%, list=28%, signal=102%
	SAK1-DOWN	186	0.299311	4.63233	0	0	0	1628	tags=54%, list=25%, signal=71%
	NOC2_BIND	65	0.500733	4.61502	0	0	0	1467	tags=72%, list=23%, signal=93%
	SMALL NUCLEOLAR RIBONUCLEOPROTEIN COMPLEX_CEL	28	0.71753	4.60835	0	0	0	1151	tags=89%, list=18%, signal=108%
	CD_DN	81	0.431146	4.58226	0	0	0	2750	tags=85%, list=43%, signal=147%
	CYTOSOLIC PART_CEL	99	0.397872	4.57192	0	0	0	2165	tags=73%, list=34%, signal=108%
	RPS4A_BIND	87	0.416143	4.5446	0	0	0	1801	tags=69%, list=28%, signal=94%
	NUCLEAR LUMEN_CEL	311	0.22619	4.5421	0	0	0	2574	tags=61%, list=40%, signal=97%
	CYTOSOLIC RIBOSOME (SENSU EUKARYOTA)_CEL	95	0.396651	4.52066	0	0	0	2165	tags=73%, list=34%, signal=108%
	RPL36B_BIND	67	0.475402	4.51665	0	0	0	2165	tags=81%, list=34%, signal=120%
	PROCESSING OF 20S PRE-RRNA_BIO	28	0.71753	4.45075	0	0	0	1151	tags=89%, list=18%, signal=108%
	RIBOSOMAL LARGE SUBUNIT BIOGENESIS AND ASSEMBLY_BIO	44	0.564084	4.4441	0	0	0	1811	tags=84%, list=28%, signal=116%
	RRP12_BIND	64	0.469356	4.41418	0	0	0	1740	tags=73%, list=27%, signal=100%
	RIBONUCLEOPROTEIN COMPLEX_CEL	298	0.219167	4.40632	0	0	0	2224	tags=55%, list=34%, signal=81%
	RPL1A_BIND	66	0.468246	4.40232	0	0	0	1800	tags=74%, list=28%, signal=102%
	RPL10_BIND	76	0.430737	4.36902	0	0	0	1923	tags=72%, list=30%, signal=102%
	NOP2_BIND	58	0.482284	4.36419	0	0	0	1811	tags=76%, list=28%, signal=104%
	BMS1_BIND	50	0.507974	4.28229	0	0	0	1135	tags=68%, list=18%, signal=82%
	CDC5_4H_DN	143	0.317312	4.28189	0	0	0	1743	tags=58%, list=27%, signal=78%
	RPL8B_BIND	112	0.349824	4.27416	0	0	0	1930	tags=64%, list=30%, signal=90%
	CIC1_BIND	58	0.464321	4.24049	0	0	0	1592	tags=71%, list=25%, signal=93%
	RPL20B_BIND	62	0.459231	4.23106	0	0	0	2165	tags=79%, list=34%, signal=118%
	SNORNA BINDING_MOL	29	0.656567	4.20119	0	0	0	1790	tags=93%, list=28%, signal=128%
	NIP7_BIND	52	0.499183	4.14627	0	0	0	2265	tags=85%, list=35%, signal=129%
	NOP56_BIND	76	0.419477	4.14504	0	0	0	1740	tags=68%, list=27%, signal=93%
	NAN1_BIND	45	0.536411	4.13007	0	0	0	1151	tags=71%, list=18%, signal=86%
	35S PRIMARY TRANSCRIPT PROCESSING_BIO	45	0.526491	4.11787	0	0	0	1645	tags=78%, list=25%, signal=104%
	CCR4_UP	168	0.271015	4.11059	0	0	0	1177	tags=45%, list=18%, signal=53%
	MPP10_BIND	51	0.476236	4.07074	0	0	0	2392	tags=84%, list=37%, signal=133%
	NOP1_BIND	134	0.306827	4.04292	0	0	0	2299	tags=66%, list=36%, signal=100%
	RRP5_BIND	95	0.368406	4.04272	0	0	0	1801	tags=64%, list=28%, signal=88%
	EMG1_BIND	28	0.639657	4.03657	0	0	0	1421	tags=86%, list=22%, signal=109%
	AMINE BIOSYNTHETIC PROCESS_BIO	101	0.336869	4.02832	0	0	0	1246	tags=52%, list=19%, signal=64%
	RRP9_BIND	31	0.603921	4.01818	0	0	0	1117	tags=77%, list=17%, signal=93%
	NOP7_BIND	60	0.441901	4.01426	0	0	0	1907	tags=73%, list=30%, signal=103%
	DIM1_BIND	26	0.652686	4.00738	0	0	0	1265	tags=85%, list=20%, signal=105%
	ERB1_BIND	64	0.427448	3.99523	0	0	0	1907	tags=72%, list=30%, signal=101%
	RPL27A_BIND	55	0.462842	3.97283	0	0	0	1849	tags=75%, list=29%, signal=104%
	NITROGEN COMPOUND BIOSYNTHETIC PROCESS_BIO	101	0.336869	3.96852	0	0	0	1246	tags=52%, list=19%, signal=64%
	OS(HOG1)_DN	68	0.412087	3.9614	0	0	0	1544	tags=65%, list=24%, signal=84%
	AMINO ACID BIOSYNTHETIC PROCESS_BIO	96	0.3432	3.92464	0	0	0	1246	tags=53%, list=19%, signal=65%
	RPL6A_BIND	74	0.385129	3.90941	0	0	0	2165	tags=72%, list=34%, signal=107%
	RPS22A_BIND	58	0.426955	3.88033	0	0	0	2165	tags=76%, list=34%, signal=113%
	SPB4_BIND	22	0.692274	3.86272	0	0	0	1414	tags=91%, list=22%, signal=116%
	SULFUR AMINO ACID METABOLIC PROCESS_BIO	27	0.621472	3.84616	0	0	0	1264	tags=81%, list=20%, signal=101%
	RPS3_BIND	92	0.356393	3.83078	0	0	0	1801	tags=63%, list=28%, signal=86%
	UTP10_BIND	44	0.488303	3.82116	0	0	0	1710	tags=75%, list=26%, signal=101%
	MRT4_BIND	108	0.311244	3.81765	0	0	0	1849	tags=59%, list=29%, signal=82%
	NSA1_BIND	39	0.514667	3.81155	0	0	0	1497	tags=74%, list=23%, signal=96%
	RPL15A_BIND	58	0.423791	3.78989	0	0	0	1740	tags=69%, list=27%, signal=94%
	PSEUDOMONAS_UP	89	0.348281	3.78803	0	0	0	1481	tags=57%, list=23%, signal=73%
	SULFUR METABOLIC PROCESS_BIO	48	0.457865	3.75445	0	0	0	562	tags=54%, list=9%, signal=59%
	YTM1_BIND	48	0.461064	3.74927	0	0	0	2021	tags=77%, list=31%, signal=111%
	NOP58_BIND	39	0.50727	3.73686	0	0	0	1710	tags=77%, list=26%, signal=104%
	UTP15_BIND	42	0.491425	3.72236	0	0	0	1151	tags=67%, list=18%, signal=81%
	CSR_DN	38	0.510644	3.70421	0	0	0	2668	tags=92%, list=41%, signal=156%
	RIBOSOME ASSEMBLY_BIO	41	0.472376	3.6994	0	0	0	2165	tags=80%, list=34%, signal=120%
	RPL13B_BIND	50	0.438932	3.69683	0	0	0	2352	tags=80%, list=36%, signal=125%
	EBP2_BIND	45	0.466864	3.68945	0	0	0	1023	tags=62%, list=16%, signal=73%
	RPS8A_BIND	138	0.265845	3.68145	0	0	0	2062	tags=58%, list=32%, signal=83%
	CYTOSOLIC LARGE RIBOSOMAL SUBUNIT (SENSU EUKARYOTA)_CEL	49	0.444622	3.67863	0	0	0	2157	tags=78%, list=33%, signal=116%
	RPS5_BIND	79	0.352354	3.67735	0	0	0	2165	tags=68%, list=34%, signal=102%
	PUF6_BIND	82	0.342378	3.67585	0	0	0	1832	tags=62%, list=28%, signal=86%
	NOP15_BIND	66	0.388178	3.67407	0	0	0	2116	tags=71%, list=33%, signal=105%
	NUG1_BIND	56	0.417589	3.66098	0	0	0	1592	tags=66%, list=25%, signal=87%
	ECM16_BIND	39	0.494156	3.65995	0	0	0	1132	tags=67%, list=18%, signal=80%
	CDC5_9H_DN	110	0.303776	3.65814	0	0	0	1534	tags=54%, list=24%, signal=69%
	DNA-DIRECTED RNA POLYMERASE ACTIVITY_MOL	32	0.538878	3.65427	0	0	0	1581	tags=78%, list=24%, signal=103%
	UTP20_BIND	36	0.513707	3.65334	0	0	0	1543	tags=75%, list=24%, signal=98%
	RPF2_BIND	54	0.423357	3.64759	0	0	0	1234	tags=61%, list=19%, signal=75%
	RNA BINDING_MOL	116	0.29603	3.64238	0	0	0	2185	tags=63%, list=34%, signal=93%
	RPL30_BIND	64	0.377601	3.63152	0	0	0	1923	tags=67%, list=30%, signal=95%
	PROTEIN-RNA COMPLEX ASSEMBLY_BIO	83	0.337809	3.62415	0	0	0	2202	tags=67%, list=34%, signal=101%
	CAD1P_TFMOTIF	382	0.164848	3.61011	0	0	0	1837	tags=44%, list=28%, signal=58%
	PNO1_BIND	27	0.573823	3.575	0	0	0	853	tags=70%, list=13%, signal=81%
	GAR1_BIND	22	0.641606	3.57059	0	0	0	1740	tags=91%, list=27%, signal=124%
	NUCLEAR DNA-DIRECTED RNA POLYMERASE COMPLEX_CEL	30	0.541955	3.56912	0	0	0	1466	tags=77%, list=23%, signal=99%
	RPS13_BIND	47	0.435627	3.56653	0	0	0	1740	tags=70%, list=27%, signal=95%
	DIP2_BIND	28	0.567917	3.55988	0	0	0	1421	tags=79%, list=22%, signal=100%
	FHL1_TF	107	0.294935	3.54531	0	0	0	2169	tags=63%, list=34%, signal=93%
	RPL16B_BIND	70	0.368494	3.5446	0	0	0	2165	tags=70%, list=34%, signal=104%
	METHIONINE METABOLIC PROCESS_BIO	22	0.624368	3.5416	0	0	0	1264	tags=82%, list=20%, signal=101%
	RPL12A_BIND	32	0.517863	3.53449	0	0	0	2523	tags=91%, list=39%, signal=148%
	RRNA MODIFICATION_BIO	16	0.712966	3.52966	0	0	0	1460	tags=94%, list=23%, signal=121%
	TBF1_TF	114	0.282909	3.52693	0	0	0	2169	tags=61%, list=34%, signal=91%
	NOP4_BIND	46	0.429411	3.52621	0	0	0	2299	tags=78%, list=36%, signal=121%
	DNA-DIRECTED RNA POLYMERASE COMPLEX_CEL	30	0.541955	3.52477	0	0	0	1466	tags=77%, list=23%, signal=99%
	GSM1P_TFMOTIF	435	0.148716	3.48775	0	0	0	2339	tags=50%, list=36%, signal=73%
	RPS7B_BIND	57	0.392454	3.48111	0	0	0	2358	tags=75%, list=37%, signal=118%
	UTP22_BIND	63	0.366696	3.47316	0	0	0	2881	tags=81%, list=45%, signal=145%
	NOP12_BIND	117	0.279394	3.46917	0	0	0	2863	tags=72%, list=44%, signal=127%
	CDC5_2H_UP	63	0.367828	3.46783	0	0	0	1849	tags=65%, list=29%, signal=90%
	RNA POLYMERASE COMPLEX_CEL	30	0.541955	3.45088	0	0	0	1466	tags=77%, list=23%, signal=99%
	RPS1B_BIND	85	0.322493	3.44136	0	0	0	1818	tags=60%, list=28%, signal=82%
	RIX1_BIND	28	0.546315	3.43444	0	0	0	2021	tags=86%, list=31%, signal=124%
	NSA2_BIND	25	0.574841	3.41501	0	0	0	1467	tags=80%, list=23%, signal=103%
	AMINE METABOLIC PROCESS_BIO	198	0.209472	3.41457	0	0	0	1264	tags=40%, list=20%, signal=48%
	RIBOSOMAL SUBUNIT ASSEMBLY_BIO	39	0.462162	3.41172	0	0	0	2165	tags=79%, list=34%, signal=119%
	RPP0_BIND	79	0.325025	3.39689	0	0	0	2421	tags=70%, list=38%, signal=110%
	AMINO ACID AND DERIVATIVE METABOLIC PROCESS_BIO	180	0.221341	3.39521	0	0	0	1264	tags=41%, list=20%, signal=50%
	ENP2_BIND	26	0.569111	3.38695	0	0	0	2299	tags=92%, list=36%, signal=143%
	RPF1_BIND	32	0.502063	3.37247	0	0	0	1414	tags=72%, list=22%, signal=92%
	RIX7_BIND	22	0.584961	3.35902	0	0	0	1811	tags=86%, list=28%, signal=120%
	RPL4B_BIND	49	0.410438	3.35901	0	0	0	1849	tags=69%, list=29%, signal=96%
	AMINO ACID METABOLIC PROCESS_BIO	174	0.219417	3.35182	0	0	0	1626	tags=47%, list=25%, signal=61%
	RPL4A_BIND	61	0.360248	3.35169	0	0	0	2352	tags=72%, list=36%, signal=112%
	NOC3_BIND	41	0.438956	3.34937	0	0	0	1907	tags=73%, list=30%, signal=103%
	RPS24B_BIND	51	0.400156	3.34635	0	0	0	1740	tags=67%, list=27%, signal=91%
	RPS11A_BIND	51	0.394242	3.34094	0	0	0	2664	tags=80%, list=41%, signal=136%
	ASPARTATE FAMILY AMINO ACID METABOLIC PROCESS_BIO	43	0.434862	3.32399	0	0	0	1264	tags=63%, list=20%, signal=78%
	RPL7A_BIND	55	0.37793	3.31407	0	0	0	1923	tags=67%, list=30%, signal=95%
	MACROMOLECULE BIOSYNTHETIC PROCESS_BIO	387	0.148875	3.29434	0	0	0	2165	tags=48%, list=34%, signal=67%
	DBP10_BIND	26	0.540041	3.28189	0	0	0	1741	tags=81%, list=27%, signal=110%
	UTP6_BIND	24	0.55426	3.28062	0	0	0	2621	tags=96%, list=41%, signal=161%
	RPL36A_BIND	66	0.341841	3.28048	0	0	0	1923	tags=64%, list=30%, signal=90%
	UTP13_BIND	32	0.482682	3.25647	0	0	0	1135	tags=66%, list=18%, signal=79%
	SOF1_BIND	27	0.524135	3.25286	0	0	0	2368	tags=89%, list=37%, signal=140%
	TRANSCRIPTION FROM RNA POLYMERASE I PROMOTER_BIO	30	0.481419	3.24057	0	0	0	1855	tags=77%, list=29%, signal=107%
	RPS1A_BIND	73	0.324814	3.23367	0	0	0	1817	tags=60%, list=28%, signal=83%
	RPL12B_BIND	26	0.530709	3.23071	0	6.9706e-06	0.001	1801	tags=81%, list=28%, signal=112%
	TRANSCRIPTION FROM RNA POLYMERASE III PROMOTER_BIO	32	0.480308	3.22565	0	6.9273e-06	0.001	2159	tags=81%, list=33%, signal=121%
	RSA4_BIND	21	0.593495	3.22491	0	6.88454e-06	0.001	2021	tags=90%, list=31%, signal=131%
	CWT1_STATPHASE_UP	75	0.322821	3.2128	0	6.84231e-06	0.001	2157	tags=65%, list=33%, signal=97%
	EUKARYOTIC 43S PREINITIATION COMPLEX_CEL	43	0.422474	3.21197	0	6.80058e-06	0.001	1944	tags=72%, list=30%, signal=102%
	IPI3_BIND	17	0.629637	3.20693	0	6.75937e-06	0.001	2021	tags=94%, list=31%, signal=137%
	RPL11A_BIND	27	0.51603	3.19866	0	1.33032e-05	0.002	2181	tags=85%, list=34%, signal=128%
	RPL16A_BIND	80	0.309959	3.19759	0	1.32235e-05	0.002	2784	tags=74%, list=43%, signal=128%
	IMP3_BIND	22	0.573855	3.18842	0	1.31448e-05	0.002	1589	tags=82%, list=25%, signal=108%
	KRI1_BIND	31	0.474542	3.16664	0	1.3067e-05	0.002	1740	tags=74%, list=27%, signal=101%
	RPS17B_BIND	53	0.374916	3.16067	0	1.29902e-05	0.002	1740	tags=64%, list=27%, signal=87%
	RPS22B_BIND	43	0.402337	3.13814	0	1.92277e-05	0.003	1923	tags=70%, list=30%, signal=99%
	DRS1_BIND	45	0.400489	3.13546	0	1.91159e-05	0.003	1592	tags=64%, list=25%, signal=85%
	GENES REPRESSED BY RAPAMYCIN	327	0.154088	3.13438	0	1.90054e-05	0.003	1483	tags=38%, list=23%, signal=46%
	IFH1_TF	103	0.260264	3.11982	0	2.51334e-05	0.004	2169	tags=59%, list=34%, signal=88%
	NITROGEN COMPOUND METABOLIC PROCESS_BIO	228	0.178794	3.10843	0	3.1358e-05	0.005	1264	tags=37%, list=20%, signal=44%
	ZAP1_UP	228	0.182833	3.10746	0	3.11798e-05	0.005	1522	tags=41%, list=24%, signal=52%
	CLA30_DN	83	0.291183	3.10316	0	3.10036e-05	0.005	399	tags=35%, list=6%, signal=37%
	RNA SPLICING_BIO	84	0.283719	3.09447	0	3.08295e-05	0.005	3648	tags=85%, list=57%, signal=192%
	RIBOSOMAL LARGE SUBUNIT ASSEMBLY AND MAINTENANCE_BIO	30	0.488266	3.0812	0	3.06572e-05	0.005	1811	tags=77%, list=28%, signal=106%
	RPL2B_BIND	38	0.430188	3.0754	0	3.04869e-05	0.005	2165	tags=76%, list=34%, signal=114%
	RNA MODIFICATION_BIO	32	0.465637	3.05988	0	3.03185e-05	0.005	2455	tags=84%, list=38%, signal=135%
	MAK21_BIND	26	0.506245	3.05145	0	3.01519e-05	0.005	1710	tags=77%, list=26%, signal=104%
	RPS8B_BIND	29	0.465209	3.02798	0	4.19941e-05	0.007	2352	tags=83%, list=36%, signal=130%
	DNA-DIRECTED RNA POLYMERASE III COMPLEX_CEL	17	0.615112	3.01102	0	5.35758e-05	0.009	1355	tags=82%, list=21%, signal=104%
	SMALL NUCLEAR RIBONUCLEOPROTEIN COMPLEX_CEL	51	0.361317	3.007	0	5.91025e-05	0.01	3761	tags=94%, list=58%, signal=224%
	CYTOSOLIC SMALL RIBOSOMAL SUBUNIT (SENSU EUKARYOTA)_CEL	38	0.411679	3.00528	0	5.87848e-05	0.01	1944	tags=71%, list=30%, signal=101%
	UTP21_BIND	32	0.466415	2.98633	0	6.43465e-05	0.011	836	tags=59%, list=13%, signal=68%
	SDA1_BIND	19	0.571981	2.9841	0	6.40042e-05	0.011	1414	tags=79%, list=22%, signal=101%
	RPL2A_BIND	55	0.336723	2.96035	0	6.93064e-05	0.012	1952	tags=64%, list=30%, signal=90%
	UTP30_BIND	35	0.428362	2.95655	0	6.89417e-05	0.012	1491	tags=66%, list=23%, signal=85%
	RIBOSOME_CEL	184	0.194758	2.95072	0	7.42905e-05	0.013	2216	tags=53%, list=34%, signal=79%
	EUKARYOTIC 48S INITIATION COMPLEX_CEL	38	0.411679	2.94832	0	7.97348e-05	0.014	1944	tags=71%, list=30%, signal=101%
	RPL1B_BIND	28	0.452174	2.94618	0	7.93217e-05	0.014	2165	tags=79%, list=34%, signal=118%
	RPS15_BIND	37	0.413018	2.94411	0	7.89128e-05	0.014	1710	tags=68%, list=26%, signal=91%
	RPL28_BIND	43	0.385518	2.94292	0	7.85081e-05	0.014	2181	tags=72%, list=34%, signal=108%
	POL5_BIND	17	0.587815	2.94058	0	7.81076e-05	0.014	1151	tags=76%, list=18%, signal=93%
	RLP24_BIND	19	0.55719	2.9377	0	7.77111e-05	0.014	1849	tags=84%, list=29%, signal=118%
	CYTOSOL_CEL	207	0.177434	2.93658	0	7.73186e-05	0.014	2165	tags=51%, list=34%, signal=74%
	GAL4_DN	153	0.203386	2.93279	0	7.69301e-05	0.014	1502	tags=43%, list=23%, signal=55%
	RPL18B_BIND	44	0.371576	2.92465	0	8.19738e-05	0.015	2165	tags=70%, list=34%, signal=105%
	NUCLEAR MRNA SPLICING, VIA SPLICEOSOME_BIO	66	0.301508	2.90162	0	8.69673e-05	0.016	3648	tags=86%, list=57%, signal=197%
