# Supplementary material for: A novel genetic circuitry governing hypoxic metabolic flexibility, commensalism and virulence in the fungal pathogen Candida albicans
Source: PLoS Pathog. 2019 Dec 6;15(12):e1007823. doi: 10.1371/journal.ppat.1007823 (PMC6919631; doi:10.1371/journal.ppat.1007823)
Supplement: S5 Table — (XLSX) [file ppat.1007823.s008.xlsx]

## Sheet: Legend
Table S5
Lists of statistically altered metabolites in snf5 under both normoxia and hypoxia as compared to the WT from the total of 522, 398 and 391 detected biochemicals in samples exposed to hypoxia at 0 (normoxia), 10 and 60 min, respectively.
	List	Title	Number of metabolites
	List 1	Metabolites enriched in snf5 mutant under both hypoxia and normoxia	52
	List 2	Metabolites enriched in snf5 mutant specifically under normoxia	56
	List 3	Metabolites enriched in snf5 mutant specifically under hypoxia	14
	List 4	Metabolites depleted in snf5 mutant specifically under normoxia	4
	List 5	Metabolites depleted in snf5 mutant in both hypoxia and normoxia	146
	List 6	Metabolites depleted in snf5 mutant specifically under hypoxia	117

## Sheet: List 1
	Super Pathway	Sub Pathway	Biochemical Name
	Amino Acid	Tryptophan Metabolism	indolelactate
		Glutathione Metabolism	cysteine-glutathione disulfide
		Glycine, Serine and Threonine Metabolism	threonine
		Methionine, Cysteine, SAM and Taurine Metabolism	hypotaurine
		Polyamine Metabolism	putrescine
		Tryptophan Metabolism	N-acetyltryptophan
		Urea cycle; Arginine and Proline Metabolism	N-acetylarginine
	Carbohydrate	Disaccharides and Oligosaccharides	sucrose
		Fructose, Mannose and Galactose Metabolism	fructose
		Glycolysis, Gluconeogenesis, and Pyruvate Metabolism	glucose
			phosphoenolpyruvate (PEP)
			3-phosphoglycerate
		Pentose Metabolism	ribulose/xylulose
	Cofactors and Vitamins	Biotin Metabolism	biotin
		Hemoglobin and Porphyrin Metabolism	biliverdin
	Lipid	Fatty Acid Metabolism (Acyl Choline)	oleoylcholine
		Fatty Acid, Monohydroxy	13-HODE + 9-HODE
		Glycerolipid Metabolism	glycerophosphoglycerol
		Long Chain Monounsaturated Fatty Acid	myristoleate (14:1n5)
			palmitoleate (16:1n7)
		Lysophospholipid	1-stearoyl-GPS (18:0)*
			1-palmitoyl-GPS (16:0)*
			1-oleoyl-GPS (18:1)
			1-palmitoyl-GPI (16:0)
			1-linoleoyl-GPS (18:2)*
			1-linoleoyl-GPI (18:2)*
			1-oleoyl-GPI (18:1)
			1-palmitoyl-GPA (16:0)
			1,2-dioleoyl-GPI (18:1/18:1)
		Phosphatidylinositol (PI)	1-stearoyl-2-oleoyl-GPI (18:0/18:1)*
		Phosphatidylserine (PS)	1,2-dioleoyl-GPS (18:1/18:1)
		Phospholipid Metabolism	glycerophosphoserine*
		Secondary Bile Acid Metabolism	6-beta-hydroxylithocholate
			taurolithocholate
			ursodeoxycholate
			lithocholate
		Sphingolipid Synthesis	sphinganine
			phytosphingosine
			sphingosine
			3-ketosphinganine
			sphinganine-1-phosphate
	Nucleotide	Dinucleotide	(3'-5')-adenylylguanosine*
			(3'-5')-adenylyluridine
			(3'-5')-adenylylcytidine
			(3'-5')-adenylyladenosine*
		Purine Metabolism, Adenine containing	adenosine 2'-monophosphate (2'-AMP)
		Pyrimidine Metabolism, Cytidine containing	cytosine
		Pyrimidine Metabolism, Orotate containing	orotidine
	Partially Characterized Molecules	Partially Characterized Molecules	branched-chain, straight-chain, or cyclopropyl 12:1 fatty acid*
	Peptide	Dipeptide	alanylleucine
			glutaminylleucine
	Other chemicals	Chemical	homocitrate

## Sheet: list 2
56
	Super Pathway	Sub Pathway	Biochemical Name
	Amino Acid	Glutamate Metabolism	butyrylglutamine/isobutyrylglutamine
		Leucine, Isoleucine and Valine Metabolism	butyrylglycine
			butyrylcarnitine (C4)
			2,3-dihydroxy-3-methylvalerate
		Lysine Metabolism	cadaverine
		Methionine, Cysteine, SAM and Taurine Metabolism	N-acetyltaurine
			2-hydroxy-4-(methylthio)butanoic acid
		Phenylalanine Metabolism	phenylpyruvate
			phenyllactate (PLA)
			phenylacetate
			N-butyryl-phenylalanine
			2,3-dihydroxyisovalerate
		Tryptophan Metabolism	kynurenine
			indolepropionate
			indoleacetate
	Lipid	Dihydroceramides	N-palmitoyl-sphinganine (d18:0/16:0)
		Fatty Acid, Dicarboxylate	2-hydroxyadipate
		Fatty Acid, Monohydroxy	2-hydroxyoleate
		Long Chain Monounsaturated Fatty Acid	oleate/vaccenate (18:1)
			eicosenoate (20:1)
			10-nonadecenoate (19:1n9)
			10-heptadecenoate (17:1n7)
		Long Chain Polyunsaturated Fatty Acid (n3 and n6)	tetradecadienoate (14:2)*
			linoleate (18:2n6)
			dihomo-linoleate (20:2n6)
		Long Chain Saturated Fatty Acid	pentadecanoate (15:0)
		Lysophospholipid	1-stearoyl-GPI (18:0)
			1-palmitoyl-GPG (16:0)*
			1-palmitoyl-GPE (16:0)
			1-palmitoleoyl-GPA (16:1)*
			1-oleoyl-GPE (18:1)
			1-linoleoyl-GPE (18:2)*
		Medium Chain Fatty Acid	5-dodecenoate (12:1n7)
		Mevalonate Metabolism	mevalonolactone
		Neurotransmitter	acetylcholine
		Phosphatidylglycerol (PG)	glycerol
		Primary Bile Acid Metabolism	deoxycholate
			chenodeoxycholate
		Secondary Bile Acid Metabolism	glycoursodeoxycholate
			glycolithocholate
			7-ketolithocholate
			6-oxolithocholate
			12-ketolithocholate
	Nucleotide	Dinucleotide	(3'-5')-guanylyluridine
			(3'-5')-cytidylyluridine*
			(3'-5')-cytidylylguanosine
			(3'-5')-cytidylyladenosine
		Purine Metabolism, (Hypo)Xanthine/Inosine containing	2'-deoxyinosine
		Purine Metabolism, Adenine containing	adenosine 3',5'-cyclic monophosphate (cAMP)
		Purine Metabolism, Guanine containing	guanosine 2'-monophosphate (2'-GMP)*
		Pyrimidine Metabolism, Thymine containing	thymidine 3'-monophosphate
		Pyrimidine Metabolism, Uracil containing	uridine 2'-monophosphate (2'-UMP)*
	Other chemicals	Chemical	4-quinolinecarboxylic acid
	Peptide	Dipeptide	valylleucine
			threonylphenylalanine
		Gamma-glutamyl Amino Acid	gamma-glutamylthreonine

## Sheet: list 3
	Super Pathway	Sub Pathway	Biochemical Name
	Amino Acid	Methionine, Cysteine, SAM and Taurine Metabolism	S-methylcysteine
		Alanine and Aspartate Metabolism	N-methylalanine
		Histidine Metabolism	formiminoglutamate
	Carbohydrate	Disaccharides and Oligosaccharides	trehalose
		Glycolysis, Gluconeogenesis, and Pyruvate Metabolism	fructose-6-phosphate
	Lipid	Long Chain Polyunsaturated Fatty Acid (n3 and n6)	stearidonate (18:4n3)
		Fatty Acid Metabolism (Acyl Choline)	palmitoloelycholine
		Endocannabinoid	oleoyl ethanolamide
		Fatty Acid Metabolism (Acyl Choline)	linoleoylcholine*
	Nucleotide	Pyrimidine Metabolism, Cytidine containing	2'-deoxycytidine
	Other chemicals	Other chemicals	ferulic acid 4-sulfate
	Peptide	Dipeptide	histidylalanine
			valylglycine
			lysylleucine

## Sheet: List 4
	Super Pathway	Sub Pathway	Biochemical Name
	Amino Acid	Alanine and Aspartate Metabolism	N-acetylaspartate (NAA)
	Lipid	Long Chain Polyunsaturated Fatty Acid (n3 and n6)	eicosapentaenoate (EPA; 20:5n3)
		Fatty Acid, Dicarboxylate	maleate
		Phosphatidic acid (PA)	1-palmitoyl-2-oleoyl-GPA (16:0/18:1)

## Sheet: List 5
	Super Pathway	Sub Pathway	Biochemical Name
	Amino Acid	Glutamate Metabolism	pyroglutamine*
		Glutamate Metabolism	4-hydroxyglutamate
		Glutathione Metabolism	CoA-glutathione*
			cysteinylglycine
			3'-dephospho-CoA-glutathione*
			glutathione, reduced (GSH)
			gamma-glutamylcysteine
			glutathione, oxidized (GSSG)
			S-methylglutathione
		Glycine, Serine and Threonine Metabolism	betaine
			phosphothreonine
			sarcosine
			homoserine
			N-acetylserine
			dimethylglycine
			2-methylserine
		Histidine Metabolism	histidine methyl ester
			1-methylhistidine
			imidazole lactate
		Lysine Metabolism	pipecolate
			5-(galactosylhydroxy)-L-lysine
			N,N,N-trimethyl-5-aminovalerate
			N,N-dimethyl-5-aminovalerate
			saccharopine
			N-acetyl-cadaverine
			hydroxy-N6,N6,N6-trimethyllysine*
		Methionine, Cysteine, SAM and Taurine Metabolism	S-adenosylhomocysteine (SAH)
		Polyamine Metabolism	N-acetylputrescine
		Urea cycle; Arginine and Proline Metabolism	N-methylproline
			argininate*
			pro-hydroxy-pro
			urea
			citrulline
		Aminosugar Metabolism	N-acetylglucosamine 6-phosphate
	Carbohydrate		N-acetylglucosamine/N-acetylgalactosamine
			N-acetyl-glucosamine 1-phosphate
		Glycolysis, Gluconeogenesis, and Pyruvate Metabolism	glucose 1-phosphate
		Nucleotide Sugar	UDP-N-acetylglucosamine/galactosamine
		Pentose Phosphate Pathway	5-phosphoribosyl diphosphate (PRPP)
		Hemoglobin and Porphyrin Metabolism	bilirubin (Z,Z)
	Cofactors and Vitamins	Nicotinate and Nicotinamide Metabolism	nicotinamide adenine dinucleotide reduced (NADH)
			quinolinate
			nicotinamide ribonucleotide (NMN)
			nicotinamide riboside
		Vitamin B6 Metabolism	pyridoxal
		Pantothenate and CoA Metabolism	3'-dephospho-acetyl-CoA
			pantetheine
			3'-dephosphocoenzyme A
			coenzyme A
			phosphopantetheine
		Thiamine Metabolism	thiamin monophosphate
		TCA Cycle	isocitrate
	Energy		citrate
			aconitate [cis or trans]
		Creatine Metabolism	creatine
	Lipid	Diacylglycerol	oleoyl-oleoyl-glycerol (18:1/18:1) [2]*
			palmitoleoyl-palmitoleoyl-glycerol (16:1/16:1) [1]*
			oleoyl-linoleoyl-glycerol (18:1/18:2) [2]
			diacylglycerol (14:0/18:1, 16:0/16:1) [1]*
			palmitoyl-linoleoyl-glycerol (16:0/18:2) [2]*
			diacylglycerol (12:0/18:1, 14:0/16:1, 16:0/14:1) [1]*
			palmitoyl-oleoyl-glycerol (16:0/18:1) [2]*
			palmitoyl-palmitoyl-glycerol (16:0/16:0) [1]*
			stearoyl-linoleoyl-glycerol (18:0/18:2) [2]*
			palmitoleoyl-oleoyl-glycerol (16:1/18:1) [2]*
			diacylglycerol (16:1/18:2 [2], 16:0/18:3 [1])*
			linoleoyl-linoleoyl-glycerol (18:2/18:2) [2]*
			myristoyl-linoleoyl-glycerol (14:0/18:2) [2]*
			diacylglycerol (14:0/18:1, 16:0/16:1) [2]*
			palmitoleoyl-palmitoleoyl-glycerol (16:1/16:1) [2]*
			palmitoyl-palmitoyl-glycerol (16:0/16:0) [2]*
			palmitoyl-myristoyl-glycerol (16:0/14:0) [2]
			diacylglycerol (12:0/18:1, 14:0/16:1, 16:0/14:1) [2]*
			linoleoyl-linolenoyl-glycerol (18:2/18:3) [2]*
			linoleoyl-linolenoyl-glycerol (18:2/18:3) [1]*
		Endocannabinoid	N-palmitoyltaurine
		Fatty Acid Metabolism	acetyl CoA
		Fatty Acid Metabolism (Acyl Carnitine, Hydroxy)	(S)-3-hydroxybutyrylcarnitine
		Fatty Acid Metabolism (Acyl Glycine)	N-palmitoylglycine
		Fatty Acid, Monohydroxy	3-hydroxylaurate
			3-hydroxydecanoate
			3-hydroxystearate
		Long Chain Monounsaturated Fatty Acid	erucate (22:1n9)
		Long Chain Polyunsaturated Fatty Acid (n3 and n6)	arachidonate (20:4n6)
			dihomo-linolenate (20:3n3 or n6)
		Lysophospholipid	1-linoleoyl-GPC (18:2)
			1-palmitoleoyl-GPC (16:1)*
			1-stearoyl-GPC (18:0)
			2-stearoyl-GPE (18:0)*
			2-palmitoyl-GPC (16:0)*
			1-palmitoyl-GPC (16:0)
			2-palmitoleoyl-GPC (16:1)*
		Phosphatidylcholine (PC)	1-palmitoleoyl-2-oleoyl-GPC (16:1/18:1)*
			1-stearoyl-2-oleoyl-GPC (18:0/18:1)
			1-palmitoleoyl-2-linoleoyl-GPC (16:1/18:2)*
			1-palmitoyl-2-arachidonoyl-GPC (16:0/20:4n6)
			1,2-dilinoleoyl-GPC (18:2/18:2)
			1-myristoyl-2-arachidonoyl-GPC (14:0/20:4)*
			1-palmitoyl-2-oleoyl-GPC (16:0/18:1)
			1,2-dipalmitoleoyl-GPC (16:1/16:1)*
			1-palmitoyl-2-palmitoleoyl-GPC (16:0/16:1)*
			1-myristoyl-2-palmitoyl-GPC (14:0/16:0)
			1-palmitoleoyl-2-linolenoyl-GPC (16:1/18:3)*
			1-linoleoyl-2-linolenoyl-GPC (18:2/18:3)*
		Phosphatidylethanolamine (PE)	1-palmitoyl-2-oleoyl-GPE (16:0/18:1)
			1,2-dipalmitoyl-GPE (16:0/16:0)*
			1-stearoyl-2-oleoyl-GPE (18:0/18:1)
			1-palmitoyl-2-linoleoyl-GPE (16:0/18:2)
			1,2-dipalmitoleoyl-GPE (16:1/16:1)*
		Phospholipid Metabolism	phosphoethanolamine
			choline phosphate
			trimethylamine N-oxide
		Purine and Pyrimidine Metabolism	methylphosphate
		Purine Metabolism, (Hypo)Xanthine/Inosine containing	allantoin
			adenosine
	Nucleotide	Purine Metabolism, Adenine containing	inosine 5'-monophosphate (IMP)
			2'-deoxyadenosine 5'-diphosphate
			adenosine 3',5'-diphosphate
			adenosine 5'-diphosphate (ADP)
			adenosine 5'-monophosphate (AMP)
			N6-succinyladenosine
			adenylosuccinate
			2'-deoxyadenosine 5'-monophosphate
		Purine Metabolism, Guanine containing	guanosine 3'-monophosphate (3'-GMP)
			guanosine 5'- monophosphate (5'-GMP)
		Pyrimidine Metabolism, Cytidine containing	cytidine triphosphate
			2'-deoxycytidine 3'-monophosphate
			cytidine diphosphate
			2'-deoxycytidine 5'-monophosphate
			cytidine 5'-monophosphate (5'-CMP)
			cytidine
		Pyrimidine Metabolism, Orotate containing	orotate
			dihydroorotate
		Pyrimidine Metabolism, Thymine containing	3-aminoisobutyrate
			thymidine 5'-monophosphate
		Pyrimidine Metabolism, Uracil containing	uridine 3'-monophosphate (3'-UMP)
			5,6-dihydrouridine
			beta-alanine
			uridine 5'-triphosphate (UTP)
		Other chemicals	ethyl alpha-glucopyranoside
			gluconate
			stachydrine
	Other chemicals	Gamma-glutamyl Amino Acid	gamma-glutamylhistidine
			gamma-glutamylleucine
			gamma-glutamyltryptophan
	Peptide		gamma-glutamylglutamine
			gamma-glutamylvaline

## Sheet: List 6
	Super Pathway	Sub Pathway	Biochemical Name
	Amino Acid	Glutamate Metabolism	N-methyl-GABA
			glutamate, gamma-methyl ester
			N-acetylglutamate
		Glycine, Serine and Threonine Metabolism	O-acetylhomoserine
			N-acetylglycine
		Histidine Metabolism	3-methylhistidine
		Leucine, Isoleucine and Valine Metabolism	carnitine
			3-methyl-2-oxovalerate
			2-methylbutyrylcarnitine (C5)
			isovalerylcarnitine (C5)
		Lysine Metabolism	N6,N6-dimethyllysine
			5-hydroxylysine
			N6-methyllysine
		Methionine, Cysteine, SAM and Taurine Metabolism	cysteine
		Polyamine Metabolism	5-methylthioadenosine (MTA)
		Tryptophan Metabolism	3-hydroxyanthranilate
		Tyrosine Metabolism	3-(4-hydroxyphenyl)lactate
			O-methyltyrosine
			tyrosol
		Urea cycle; Arginine and Proline Metabolism	trans-4-hydroxyproline
			dimethylarginine (SDMA + ADMA)
			N-monomethylarginine
	Carbohydrate	Aminosugar Metabolism	N-acetylmuramate
			glucosamine-6-phosphate
		Disaccharides and Oligosaccharides	trehalose 6-phosphate
		Fructose, Mannose and Galactose Metabolism	mannose-6-phosphate
			galactose 1-phosphate
			glucose 6-phosphate
		Nucleotide Sugar	UDP-galactose
			UDP-glucose
		Pentose Phosphate Pathway	6-phosphogluconate
			sedoheptulose-7-phosphate
	Cofactors and Vitamins	Nicotinate and Nicotinamide Metabolism	nicotinamide
		Riboflavin Metabolism	flavin mononucleotide (FMN)
		Vitamin B6 Metabolism	pyridoxal phosphate
		Hemoglobin and Porphyrin Metabolism	5-aminolevulinate
	Energy	Oxidative Phosphorylation	acetylphosphate
		TCA Cycle	2-methylcitrate
			alpha-ketoglutarate
	Lipid	Carnitine Metabolism	deoxycarnitine
		Diacylglycerol	palmitoyl-linoleoyl-glycerol (16:0/18:2) [1]*
			palmitoleoyl-oleoyl-glycerol (16:1/18:1) [1]*
			linoleoyl-linoleoyl-glycerol (18:2/18:2) [1]*
			oleoyl-arachidonoyl-glycerol (18:1/20:4) [1]*
			palmitoleoyl-linoleoyl-glycerol (16:1/18:2) [1]*
			palmitoyl-oleoyl-glycerol (16:0/18:1) [1]*
			oleoyl-arachidonoyl-glycerol (18:1/20:4) [2]*
			palmitoyl-myristoyl-glycerol (16:0/14:0) [1]*
		Endocannabinoid	N-oleoyltaurine
			N-stearoyltaurine
		Fatty Acid Metabolism (Acyl Carnitine, Short Chain)	acetylcarnitine (C2)
		Fatty Acid Metabolism (Acyl Glycine)	N-oleoylglycine
		Fatty Acid Metabolism (also BCAA Metabolism)	propionylcarnitine (C3)
		Fatty Acid Synthesis	malonate
		Fatty Acid, Dicarboxylate	3-hydroxyadipate*
			3-hydroxyoctanoate
			2-hydroxypalmitate
			3-hydroxyoleate*
			2-hydroxystearate
		Lipid	1-stearoyl-2-oleoyl-GPG (18:0/18:1)
		Lipid	1,2-dipalmitoyl-GPG (16:0/16:0)
		Long Chain Polyunsaturated Fatty Acid (n3 and n6)	docosapentaenoate (n3 DPA; 22:5n3)
			docosahexaenoate (DHA; 22:6n3)
		Long Chain Saturated Fatty Acid	margarate (17:0)
			nonadecanoate (19:0)
			palmitate (16:0)
			stearate (18:0)
			behenate (22:0)*
			arachidate (20:0)
		Lysophospholipid	1-stearoyl-GPG (18:0)
			1-linolenoyl-GPC (18:3)*
			1-linoleoyl-GPG (18:2)*
			1-oleoyl-GPG (18:1)*
		Medium Chain Fatty Acid	heptanoate (7:0)
			5-dodecenoate (12:1n7)
			caproate (6:0)
			caprylate (8:0)
		Mevalonate Metabolism	3-hydroxy-3-methylglutarate
			3-hydroxy-3-methylglutaryl CoA
		Monoacylglycerol	1-linoleoylglycerol (18:2)
			1-oleoylglycerol (18:1)
		Phosphatidylcholine (PC)	1-oleoyl-2-linoleoyl-GPC (18:1/18:2)*
			1,2-dipalmitoyl-GPC (16:0/16:0)
			1-stearoyl-2-linoleoyl-GPC (18:0/18:2)*
			1-palmitoyl-2-stearoyl-GPC (16:0/18:0)
			1-linoleoyl-2-arachidonoyl-GPC (18:2/20:4n6)*
		Phosphatidylethanolamine (PE)	1-stearoyl-2-linoleoyl-GPE (18:0/18:2)*
		Phospholipid Metabolism	cytidine-5'-diphosphoethanolamine
			cytidine 5'-diphosphocholine
			glycerophosphoinositol*
			choline
		Short Chain Fatty Acid	valerate (5:0)
	Nucleotide	Purine Metabolism, (Hypo)Xanthine/Inosine containing	inosine
			2'-deoxyinosine
			N1-methylinosine
		Purine Metabolism, Adenine containing	adenine
			2'-deoxyadenosine
			1-methyladenine
			2'-O-methyladenosine
			adenosine 3'-monophosphate (3'-AMP)
		Purine Metabolism, Guanine containing	guanosine
			2'-deoxyguanosine
		Pyrimidine Metabolism, Orotate containing	N-carbamoylaspartate
			2'-deoxyuridine
	Other chemicals	Bacterial/Fungal	3-deoxyoctulosonate
		Other chemicals	2,3-dihydroxyisovalerate
			thioproline
			succinimide
			2-isopropylmalate
	Partially Characterized Molecules	branched-chain, straight-chain, or cyclopropyl 10:1 fatty acid (1)*	branched-chain, straight-chain, or cyclopropyl 10:1 fatty acid (1)*
	Peptide	Gamma-glutamyl Amino Acid	gamma-glutamylglycine
			gamma-glutamylserine
			gamma-glutamylmethionine
			gamma-glutamyl-alpha-lysine
			gamma-glutamylisoleucine*
			gamma-glutamyltyrosine
			gamma-glutamyl-epsilon-lysine
