# Supplementary material for: A novel genetic circuitry governing hypoxic metabolic flexibility, commensalism and virulence in the fungal pathogen Candida albicans
Source: PLoS Pathog. 2019 Dec 6;15(12):e1007823. doi: 10.1371/journal.ppat.1007823 (PMC6919631; doi:10.1371/journal.ppat.1007823)
Supplement: S6 Table — (XLSX) [file ppat.1007823.s009.xlsx]

## Sheet: Legend
Table S6
Full metabolomic analysis of snf5 mutant under both normoxia and hypoxia as compared to the WT strain.
Legend
Pathway Heat Map		This is the heat map associated with the statistical analysis of the data.
		Indicates ratios, p- and q-values for each comparison.
		0.55	Green: indicates significant difference (p≤0.05) between the groups shown, metabolite ratio of < 1.00
		0.76	Light Green: narrowly missed statistical cutoff for significance 0.05<p<0.10, metabolite ratio of < 1.00
		1.71	Red: indicates significant difference (p≤0.05) between the groups shown; metabolite ratio of ≥ 1.00
		1.32	Light Red: narrowly missed statistical cutoff for significance 0.05<p<0.10, metabolite ratio of ≥ 1.00
		1.2	Non-colored text and cell: mean values are not significantly different for that comparison

## Sheet: Table S6
Heat map of statistically significant biochemicals profiled in this study.						Data Normalization: Bradford Protein Concentration
									Δsnf5 WT
Pathway Sort Order	Super Pathway	Sub Pathway	Biochemical Name	Platform	Comp ID	KEGG	HMDB	PubChem
									Normoxia T0	Hypoxia T10	Hypoxia T60
1	Amino Acid	Glycine, Serine and Threonine Metabolism	glycine	LC/MS pos early	58	C00037	HMDB00123	750	1.03	0.88	0.85
2			N-acetylglycine	LC/MS pos early	27710		HMDB00532	10972	0.53	0.31	0.37
4			sarcosine	LC/MS pos early	1516	C00213	HMDB00271	1088	0.23	0.17	0.43
5			dimethylglycine	LC/MS pos early	5086	C01026	HMDB00092	673	0.14	0.11	0.1
6			betaine	LC/MS pos early	3141	C00719	HMDB00043	247	0.38	0.28	0.25
9			serine	LC/MS pos early	1648	C00065	HMDB00187	5951	1.01	0.95	0.72
10			N-acetylserine	LC/MS pos early	37076		HMDB02931	65249	0.15	0.17	0.21
11			N-carbamoylserine	LC/MS polar	54727			3687740	0.91	0.64	0.56
15			2-methylserine	LC/MS pos early	53229	C02115		94309	0.14	0.12	0.11
16			threonine	LC/MS pos early	1284	C00188	HMDB00167	6288	2.57	2.16	1.76
17			N-acetylthreonine	LC/MS neg	33939		HMDB62557	152204	1.28	1.07	1.05
18			allo-threonine	LC/MS polar	15142	C05519	HMDB04041	99289	1.47	1.35	1.81
19			phosphothreonine	LC/MS pos early	37453	C12147		1016	0.31	0.43	0.44
21			homoserine	LC/MS polar	18351	C00263	HMDB00719	12647	0.22	0.23	0.22
22			O-acetylhomoserine	LC/MS neg	31539	C01077		439389	0.74	0.48	0.54
28		Alanine and Aspartate Metabolism	alanine	LC/MS pos early	1126	C00041	HMDB00161	5950	1.06	0.88	0.85
30			N-acetylalanine	LC/MS neg	1585	C02847	HMDB00766	88064	1.32	0.93	0.86
31			N-methylalanine	LC/MS pos early	37069	C02721	HMDB01906	5288725	1.89	1.68	2.08
34			N-carbamoylalanine	LC/MS pos early	52340			426409	1.26	0.86	0.85
35			aspartate	LC/MS pos early	443	C00049	HMDB00191	5960	1.01	1.18	0.98
36			N-acetylaspartate (NAA)	LC/MS polar	22185	C01042	HMDB00812	65065	0.44	0.68	0.68
39			asparagine	LC/MS pos early	512	C00152	HMDB00168	6267	0.87	1.01	0.85
40			N-acetylasparagine	LC/MS pos early	33942		HMDB06028	99715	0.76	0.63	0.57
42		Glutamate Metabolism	glutamate	LC/MS pos early	57	C00025	HMDB00148	611	0.68	0.6	0.58
43			glutamine	LC/MS pos early	53	C00064	HMDB00641	5961	0.86	0.72	0.68
44			alpha-ketoglutaramate*	LC/MS polar	62101				1.09	0.87	0.79
45			N-acetylglutamate	LC/MS pos early	15720	C00624	HMDB01138	70914	1.08	0.37	0.46
46			N-acetylglutamine	LC/MS polar	33943	C02716	HMDB06029	182230	1.1	0.82	0.91
48			4-hydroxyglutamate	LC/MS pos early	40499	C03079	HMDB01344	439902	0.14	0.11	0.13
51			glutamate, gamma-methyl ester	LC/MS pos early	33487		HMDB61715	68662	0.8	0.62	0.48
52			pyroglutamine*	LC/MS pos early	46225			134508	0.41	0.3	0.39
56			carboxyethyl-GABA	LC/MS pos early	40007		HMDB02201	2572	1.59	1.89	1.31
57			N-methyl-GABA	LC/MS pos early	39577	C15987		70703	0.89	0.45	0.51
58			2-pyrrolidinone	LC/MS pos early	31675		HMDB02039	12025	1.26	1.05	0.82
61			citramalate	LC/MS polar	22158	C00815	HMDB00426	1081	1.55	1	0.93
63			butyrylglutamine/isobutyrylglutamine	LC/MS neg	54934				2.55	1.5	1.35
66		Histidine Metabolism	histidine	LC/MS neg	59	C00135	HMDB00177	6274	0.78	0.55	0.61
67			1-methylhistidine	LC/MS pos early	30460	C01152	HMDB00001	92105	0.31	0.18	0.32
68			3-methylhistidine	LC/MS pos early	15677	C01152	HMDB00479	64969	0.61	0.47	0.49
69			N-acetylhistidine	LC/MS pos early	33946	C02997	HMDB32055	75619	1.75	1.58	1.75
72			hydantoin-5-propionate	LC/MS polar	40473	C05565	HMDB01212	782	1.44	1.03	0.99
75			imidazole propionate	LC/MS pos early	40730		HMDB02271	70630	0.84	1.03	0.89
76			formiminoglutamate	LC/MS pos early	43493	C00439	HMDB00854	439233	1.18	2.64	0.85
77			imidazole lactate	LC/MS pos early	15716	C05568	HMDB02320	440129	0.27	0.13	0.26
81			anserine	LC/MS pos early	15747	C01262	HMDB00194	112072	0.96	0.74	0.69
82			histamine	LC/MS pos early	1574	C00388	HMDB00870	774	0.85	0.67	0.67
89			4-imidazoleacetate	LC/MS pos early	32349	C02835	HMDB02024	96215	1.15	1.01	1.45
94			histidine methyl ester	LC/MS pos early	32493			92893	0.5	0.44	0.36
97		Lysine Metabolism	lysine	LC/MS pos early	1301	C00047	HMDB00182	5962	1.02	0.7	0.85
99			N6-acetyllysine	LC/MS neg	36752	C02727	HMDB00206	92832	0.65	0.62	0.91
104			N6-formyllysine	LC/MS pos early	17895			70923	1.03	0.77	0.81
105			N6-carboxyethyllysine	LC/MS pos early	37458				1.47	1.21	1.63
106			N6-methyllysine	LC/MS pos early	62860	C02728	HMDB02038	164795	0.54	0.41	0.42
107			N6,N6-dimethyllysine	LC/MS pos early	62862	C05545	HMDB13287	193344	0.65	0.5	0.52
108			N6,N6,N6-trimethyllysine	LC/MS pos early	1498	C03793	HMDB01325	440120	1.07	0.72	0.58
109			hydroxy-N6,N6,N6-trimethyllysine*	LC/MS pos early	62959				0.06	0.1	0.05
110			5-hydroxylysine	LC/MS pos early	15685	C16741	HMDB00450	1029	0.72	0.45	0.48
111			5-(galactosylhydroxy)-L-lysine	LC/MS pos early	43582				0.43	0.3	0.3
112			fructosyllysine	LC/MS pos early	46227			123708	1.01	0.75	0.62
113			saccharopine	LC/MS pos early	1495	C00449	HMDB00279	160556	0.33	0.28	0.41
114			2-aminoadipate	LC/MS polar	6146	C00956	HMDB00510	469	1.14	0.84	0.64
122			pipecolate	LC/MS pos early	1444	C00408	HMDB00070	849	0.44	0.36	0.34
123			6-oxopiperidine-2-carboxylate	LC/MS neg	43231		HMDB61705	3014237	1.22	0.94	0.95
124			cadaverine	LC/MS pos early	15308	C01672	HMDB02322	273	2.03	1.55	1.42
125			N-acetyl-cadaverine	LC/MS pos early	43530		HMDB02284	189087	0.16	0.13	0.13
126			5-aminovalerate	LC/MS pos early	18319	C00431	HMDB03355	138	0.7	0.6	0.53
127			N,N-dimethyl-5-aminovalerate	LC/MS pos early	62819				0.34	0.27	0.26
128			N,N,N-trimethyl-5-aminovalerate	LC/MS pos early	57687				0.4	0.32	0.29
129		Phenylalanine Metabolism	phenylalanine	LC/MS pos early	64	C00079	HMDB00159	6140	1.24	0.95	0.93
130			N-acetylphenylalanine	LC/MS neg	33950	C03519	HMDB00512	74839	1.84	1.35	1.18
133			N-butyryl-phenylalanine	LC/MS neg	63406				4.74	1.31	1.56
135			1-carboxyethylphenylalanine	LC/MS neg	62566				1.67	1.18	1.04
139			phenylpyruvate	LC/MS neg	566	C00166	HMDB00205	997	2.18	1.82	0.92
140			phenyllactate (PLA)	LC/MS neg	22130	C05607	HMDB00779	3848	4.08	1.11	1.14
143			phenethylamine	LC/MS pos early	12142	C05332	HMDB02017	1001	1.94	1.22	1.17
144			phenylacetate	LC/MS neg	57745	C07086	HMDB00209	999	2.22	0.92	0.92
145			2-hydroxyphenylacetate	LC/MS neg	1432	C05852	HMDB00669	11970	1.63	1.23	0.94
151		Tyrosine Metabolism	tyrosine	LC/MS pos early	1299	C00082	HMDB00158	6057	1.66	1.1	0.93
152			N-acetyltyrosine	LC/MS neg	32390		HMDB00866	68310	1.94	1.52	1.58
153			1-carboxyethyltyrosine	LC/MS neg	62564				1.57	1.16	1.01
157			tyramine	LC/MS pos early	1603	C00483	HMDB00306	5610	1.8	1.03	0.93
162			4-hydroxyphenylpyruvate	LC/MS neg	1669	C01179	HMDB00707	979	1.56	1.05	0.65
163			tyrosol	LC/MS neg	41515	C06044	HMDB04284	10393	1.42	0.25	0.34
167			3-(4-hydroxyphenyl)lactate	LC/MS neg	32197	C03672	HMDB00755	9378	1.77	0.49	0.57
186			3-methoxytyramine	LC/MS pos early	38630	C05587	HMDB00022	1669	1.86	1.22	1.11
197			o-Tyrosine	LC/MS pos early	43392		HMDB06050	91482	1.34	1.24	1.2
198			O-methyltyrosine	LC/MS pos early	37451			76957	0.77	0.59	0.43
201			5-hydroxymethyl-2-furoic acid	LC/MS neg	42040	C20448	HMDB02432	80642	1.52	1.05	1.02
206			p-cresol glucuronide*	LC/MS neg	48841		HMDB11686	154035	1.85	1.51	1.42
208			N-formylphenylalanine	LC/MS neg	48433			759256	1.46	1.1	0.98
228		Tryptophan Metabolism	tryptophan	LC/MS pos early	54	C00078	HMDB00929	6305	1.32	1.1	1.02
229			N-acetyltryptophan	LC/MS neg	33959	C03137	HMDB13713	700653	2.39	2.14	1.65
239			kynurenine	LC/MS pos early	15140	C00328	HMDB00684	161166	2.11	1.16	0.95
243			kynurenate	LC/MS neg	1417	C01717	HMDB00715	3845	1.21	0.74	0.77
245			N-formylanthranilic acid	LC/MS neg	43549	C05653	HMDB04089	101399	1.57	0.92	1.06
251			indole-3-acetaldehyde	LC/MS polar	63054	C00637	HMDB01190	800	1.33	1.08	1.01
252			3-hydroxyanthranilate	LC/MS pos early	32353	C00632	HMDB01476	86	0.55	0.61	0.35
253			picolinate	LC/MS pos early	1512	C10164	HMDB02243	1018	1.59	0.95	0.99
263			tryptamine	LC/MS pos early	6104	C00398	HMDB00303	1150	1.49	1	1.65
265			indolelactate	LC/MS neg	18349	C02043	HMDB00671	92904	17.69	2.26	3.24
266			indoleacetate	LC/MS neg	27513	C00954	HMDB00197	802	2.14	0.99	0.77
269			indolepropionate	LC/MS neg	32405		HMDB02302	3744	2.5	1.3	1.01
274			indole-3-carboxylate	LC/MS neg	38116	C19837	HMDB03320	69867	1.88	1	1
288		Leucine, Isoleucine and Valine Metabolism	leucine	LC/MS pos early	60	C00123	HMDB00687	6106	1	0.79	0.73
289			N-acetylleucine	LC/MS neg	1587	C02710	HMDB11756	70912	1.26	1.01	0.91
290			N-butyryl-leucine	LC/MS neg	63415				1.8	0.92	0.82
291			N-isobutyryl-leucine	LC/MS neg	63594				1.47	1.06	0.9
293			1-carboxyethylleucine	LC/MS neg	62559				1.63	1.17	1.05
295			4-methyl-2-oxopentanoate	LC/MS neg	22116	C00233	HMDB00695	70	1.65	1.26	0.55
299			alpha-hydroxyisocaproate	LC/MS neg	22132	C03264	HMDB00746	83697	1.52	1.15	0.95
303			isovalerate (i5:0)	LC/MS neg	44656	C08262	HMDB00718	10430	1.29	0.67	0.65
304			isovalerylglycine	LC/MS neg	35107		HMDB00678	546304	1.34	1.04	0.94
305			isovalerylcarnitine (C5)	LC/MS pos early	34407		HMDB00688	6426851	0.81	0.4	0.36
328			isoleucine	LC/MS pos early	1125	C00407	HMDB00172	6306	0.76	0.66	0.63
330			N-acetylisoleucine	LC/MS neg	33967		HMDB61684	306109	1	1.2	0.96
331			N-butyryl-isoleucine	LC/MS neg	63416				1.62	1.18	0.88
332			N-isobutyryl-isoleucine	LC/MS neg	63596				1.57	1.1	0.77
334			1-carboxyethylisoleucine	LC/MS neg	62558				1.57	1.1	0.97
335			3-methyl-2-oxovalerate	LC/MS neg	15676	C00671	HMDB03736	47	1.07	1.04	0.41
336			2-hydroxy-3-methylvalerate	LC/MS neg	36746		HMDB00317	164623	1.81	0.98	0.99
338			2-methylbutyrylcarnitine (C5)	LC/MS pos early	45095		HMDB00378	6426901	0.78	0.48	0.38
345			butyryl/isobutyryl CoA	LC/MS neg	57383				0.93	0.56	0.72
347			methylsuccinate	LC/MS polar	15745		HMDB01844	10349	1.1	1.07	0.97
353			valine	LC/MS pos early	1649	C00183	HMDB00883	6287	0.97	0.82	0.85
354			N-acetylvaline	LC/MS neg	1591		HMDB11757	66789	0.92	0.8	0.86
356			N-carbamoylvaline	LC/MS neg	62852			5151292	0.93	0.64	0.59
357			1-carboxyethylvaline	LC/MS neg	62562				1.47	1.03	0.98
360			alpha-hydroxyisovalerate	LC/MS polar	46537		HMDB00407	99823	1.59	1.16	1.09
362			isobutyrylcarnitine (C4)	LC/MS pos early	33441		HMDB00736	168379	1.75	1.33	1.04
363			isobutyrylglycine	LC/MS neg	35437		HMDB00730	10855600	1.39	1.04	0.98
368			2,3-dihydroxy-3-methylvalerate	LC/MS neg	63069	C04104		8	2.52	1.21	1.92
370		Methionine, Cysteine, SAM and Taurine Metabolism	methionine	LC/MS pos early	1302	C00073	HMDB00696	6137	1.16	0.8	0.73
371			N-acetylmethionine	LC/MS neg	1589	C02712	HMDB11745	448580	0.92	0.77	0.66
372			N-formylmethionine	LC/MS neg	2829	C03145	HMDB01015	439750	1.13	0.79	0.57
374			methionine sulfone	LC/MS pos early	44878			69961	1.21	0.76	0.82
375			methionine sulfoxide	LC/MS pos early	18374	C02989	HMDB02005	158980	1.5	1.13	0.82
376			N-acetylmethionine sulfoxide	LC/MS pos early	45428			193368	1.23	0.74	0.54
380			S-adenosylmethionine (SAM)	LC/MS pos early	15915	C00019	HMDB01185	34756	1.18	0.71	0.61
381			S-adenosylhomocysteine (SAH)	LC/MS neg	42382	C00021	HMDB00939	439155	0.29	0.27	0.21
384			2-hydroxy-4-(methylthio)butanoic acid	LC/MS neg	63739				2.97	0.68	0.71
385			homocysteine	LC/MS pos early	15128	C00155	HMDB00742	778	1.38	0.82	1.04
388			cystathionine	LC/MS pos early	15705	C02291	HMDB00099	439258	0.85	0.7	0.75
390			cysteine	LC/MS pos early	1868	C00097	HMDB00574	5862	0.84	0.45	0.7
391			N-acetylcysteine	LC/MS neg	1586	C06809	HMDB01890	12035	0.97	0.79	1.04
392			S-methylcysteine	LC/MS neg	39592		HMDB02108	24417	0.93	1.39	2.46
402			cysteine sulfinic acid	LC/MS pos early	37443	C00606	HMDB00996	109	1.66	1.27	1.13
404			hypotaurine	LC/MS pos early	590	C00519	HMDB00965	107812	3.16	2.57	2.39
405			taurine	LC/MS polar	2125	C00245	HMDB00251	1123	1.21	0.96	0.96
407			N-acetyltaurine	LC/MS neg	48187			159864	3.19	1.84	1.78
411			3-sulfo-L-alanine	LC/MS pos early	47089	C00506	HMDB02757	72886	1.93	1.44	1.33
413		Urea cycle; Arginine and Proline Metabolism	arginine	LC/MS pos early	1638	C00062	HMDB00517	232	1.62	1.1	1.1
414			argininosuccinate	LC/MS neg	15497	C03406	HMDB00052	16950	1.32	0.96	0.89
415			urea	LC/MS pos early	1670	C00086	HMDB00294	1176	0.05	0.04	0.27
417			ornithine	LC/MS pos early	1493	C00077	HMDB03374	6262	0.8	0.62	0.77
419			3-amino-2-piperidone	LC/MS pos early	62853		HMDB00323	5200225	1.69	1.24	1.05
421			2-oxoarginine*	LC/MS pos early	55072	C03771	HMDB04225	558	0.96	0.75	0.51
422			citrulline	LC/MS pos early	2132	C00327	HMDB00904	9750	0.41	0.27	0.25
423			homoarginine	LC/MS pos early	22137	C01924	HMDB00670	9085	0.77	0.57	0.64
424			homocitrulline	LC/MS polar	22138	C02427	HMDB00679	65072	0.94	0.68	0.77
425			proline	LC/MS pos early	1898	C00148	HMDB00162	145742	1.3	1	0.77
428			dimethylarginine (SDMA + ADMA)	LC/MS pos early	36808	C03626	HMDB01539	123831	0.58	0.45	0.48
429			N-acetylarginine	LC/MS pos early	33953	C02562	HMDB04620	67427	2.09	1.69	2.03
433			N-acetylcitrulline	LC/MS pos early	48434	C15532	HMDB00856	656979	1.79	0.83	0.74
434			N-acetylproline	LC/MS neg	34387			322640	1.05	1.1	0.93
435			N-delta-acetylornithine	LC/MS neg	43249			9920500	0.74	0.56	0.6
436			N-alpha-acetylornithine	LC/MS pos early	32984	C00437	HMDB03357	439232	0.82	0.51	0.58
440			trans-4-hydroxyproline	LC/MS pos early	32306	C01157	HMDB00725	5810	0.52	0.47	1.06
442			pro-hydroxy-pro	LC/MS pos early	35127		HMDB06695	11673055	0.08	0.11	0.11
445			N-methylproline	LC/MS pos early	37431			557	0.29	0.22	0.25
446			N,N,N-trimethyl-alanylproline betaine (TMAP)	LC/MS pos early	62947				0.81	0.67	0.64
448			N-monomethylarginine	LC/MS pos early	43586	C03884	HMDB29416	132862	0.62	0.42	0.42
449			argininate*	LC/MS pos early	57461		HMDB03148	160437	0.28	0.23	0.24
454		Creatine Metabolism	guanidinoacetate	LC/MS pos early	43802	C00581	HMDB00128	763	0.64	0.69	0.79
455			creatine	LC/MS pos early	27718	C00300	HMDB00064	586	0.11	0.09	0.18
456			creatinine	LC/MS pos early	513	C00791	HMDB00562	588	1.78	1.03	0.63
458			N-methylhydantoin	LC/MS neg	40006	C02565	HMDB03646	69217	1.15	1.01	0.75
461		Polyamine Metabolism	agmatine	LC/MS pos early	15496	C00179	HMDB01432	199	1.58	1.12	1.05
463			putrescine	LC/MS pos early	1408	C00134	HMDB01414	1045	4.37	2.62	1.61
464			N-acetylputrescine	LC/MS pos early	37496	C02714	HMDB02064	122356	0.18	0.13	0.13
469			spermidine	LC/MS pos early	485	C00315	HMDB01257	1102	1.31	0.86	0.7
474			(N(1) + N(8))-acetylspermidine	LC/MS pos early	57814				1.59	0.97	0.72
479			5-methylthioadenosine (MTA)	LC/MS pos early	1419	C00170	HMDB01173	439176	0.88	0.54	0.48
480			gamma-glutamyl-GABA	LC/MS pos early	54906			355553	0.69	0.54	0.53
483			4-acetamidobutanoate	LC/MS pos early	1558	C02946	HMDB03681	18189	1.29	1.17	0.8
485		Guanidino and Acetamido Metabolism	4-guanidinobutanoate	LC/MS pos early	15681	C01035	HMDB03464	500	1.71	1.44	1.48
488		Glutathione Metabolism	glutathione, reduced (GSH)	LC/MS pos early	2127	C00051	HMDB00125	124886	0.4	0.28	0.34
489			glutathione, oxidized (GSSG)	LC/MS pos early	27727	C00127	HMDB03337	65359	0.25	0.17	0.22
492			cysteine-glutathione disulfide	LC/MS pos early	35159		HMDB00656	4247235	4.01	2.97	1.63
493			S-methylglutathione	LC/MS pos early	33944	C11347		3605667	0.12	0.1	0.1
494			S-lactoylglutathione	LC/MS pos early	15731	C03451	HMDB01066	440018	0.75	0.72	0.64
495			cysteinylglycine	LC/MS pos early	35637	C01419	HMDB00078	439498	0.46	0.29	0.39
498			5-oxoproline	LC/MS neg	1494	C01879	HMDB00267	7405	1.29	0.87	0.82
501			2-hydroxybutyrate/2-hydroxyisobutyrate	LC/MS polar	52281				1.43	0.97	0.94
503			ophthalmate	LC/MS pos early	34592		HMDB05765	7018721	1.08	0.52	0.63
508			3'-dephospho-CoA-glutathione*	LC/MS neg	62807				0.42	0.21	0.24
509			CoA-glutathione*	LC/MS neg	62804	C00920		11953788	0.02	0.02	0.04
548	Peptide	Gamma-glutamyl Amino Acid	gamma-glutamylcysteine	LC/MS pos early	1778	C00669	HMDB01049	842	0.26	0.21	0.27
550			gamma-glutamylglutamine	LC/MS pos early	2730	C05283	HMDB11738	150914	0.36	0.3	0.32
551			gamma-glutamylglycine	LC/MS pos early	33949		HMDB11667	165527	0.56	0.48	0.52
552			gamma-glutamylhistidine	LC/MS pos early	18245			7017195	0.06	0.07	0.04
553			gamma-glutamylisoleucine*	LC/MS pos early	34456		HMDB11170	14253342	0.55	0.48	0.49
554			gamma-glutamylleucine	LC/MS pos early	18369		HMDB11171	151023	0.5	0.37	0.41
555			gamma-glutamyl-alpha-lysine	LC/MS pos early	55015			65254	0.72	0.48	0.49
556			gamma-glutamyl-epsilon-lysine	LC/MS pos early	33934		HMDB03869	7015685	0.79	0.34	0.34
557			gamma-glutamylmethionine	LC/MS pos early	44872		HMDB29155	7009567	0.91	0.66	0.38
558			gamma-glutamylphenylalanine	LC/MS pos early	33422		HMDB00594	111299	0.73	0.54	0.53
559			gamma-glutamylthreonine	LC/MS pos early	33364		HMDB29159	76078708	2.05	1.95	1.45
560			gamma-glutamyltryptophan	LC/MS neg	33947		HMDB29160	3989307	0.47	0.21	0.31
561			gamma-glutamyltyrosine	LC/MS neg	2734		HMDB11741	94340	0.61	0.46	0.45
562			gamma-glutamylvaline	LC/MS pos early	43829		HMDB11172	7015683	0.28	0.25	0.27
563			gamma-glutamylserine	LC/MS pos early	54914				0.8	0.57	0.43
567		Dipeptide Derivative	isoleucylhydroxyproline*	LC/MS pos early	63051		HMDB28908		1.03	0.77	0.87
568			leucylhydroxyproline*	LC/MS pos early	63052		HMDB28930		0.81	0.56	0.59
578		Dipeptide	alanylleucine	LC/MS pos early	37093		HMDB28691	259583	3.38	2.05	1.52
654			cyclo(gly-phe)	LC/MS pos early	37102			7076549	1.5	1.1	0.91
655			cyclo(gly-pro)	LC/MS pos early	37077			126154	1.24	1	0.86
659			cyclo(his-phe)	LC/MS pos early	52361			7408279	1.18	0.97	0.91
679			cyclo(phe-pro)	LC/MS pos early	44875	C11847		9837725;443440	1.2	0.78	0.71
680			cyclo(phe-pro) (L,D)*	LC/MS pos early	43787			6992198	1.2	0.78	0.76
690			cyclo(pro-tyr)	LC/MS neg	43522				1.53	1.1	0.92
691			cyclo(pro-tyr) (D,L)*	LC/MS neg	62872				1.42	1.05	1.02
704			glutaminylleucine	LC/MS pos early	42994				2.48	1.9	2.27
727			glycylisoleucine	LC/MS pos early	36659		HMDB28844	88079	1.27	1.41	0.77
728			glycylleucine	LC/MS pos early	34398	C02155	HMDB00759	92843	1.43	1.41	0.9
738			glycylvaline	LC/MS pos early	18357		HMDB28854	97417	1.64	1.42	0.99
743			histidylalanine	LC/MS pos early	42027		HMDB28878	351667	1.66	2.15	1.44
762			isoleucylglycine	LC/MS neg	40008		HMDB28907	342532	1.21	1	0.87
776			leucylalanine	LC/MS pos early	40010		HMDB28922	259321	1.08	0.64	0.64
781			leucylglycine	LC/MS pos early	40045		HMDB28929	79070	1.5	0.88	0.89
801			lysylleucine	LC/MS pos early	40020		HMDB28955	4682588	1.52	2.04	1.63
830			phenylalanylalanine	LC/MS neg	41374			5488196	1.2	0.61	0.78
835			phenylalanylglycine	LC/MS pos early	41370		HMDB28995	98207	0.9	0.7	0.67
855			prolylglycine	LC/MS pos early	40703		HMDB11178	6426709	0.86	0.75	0.6
893			threonylphenylalanine	LC/MS neg	31530		HMDB29068	4099799	3.09	1.74	1.65
904			tryptophylglycine	LC/MS pos early	43028		HMDB29083	263471	1.3	1.05	1.17
920			tyrosylglycine	LC/MS neg	41375		HMDB29105	259323	1.25	1.06	0.94
937			valylglutamine	LC/MS pos early	42079		HMDB29125	5253209	1.48	1.17	1.05
938			valylglycine	LC/MS pos early	40475		HMDB29127	136487	1.91	2.09	1.04
941			valylleucine	LC/MS pos early	39994		HMDB29131	352039	2.99	1.68	1.73
951			leucylglutamine*	LC/MS pos early	48189		HMDB28927	4305457	1.31	1.27	1.04
1035		Acetylated Peptides	phenylacetylglutamine	LC/MS neg	35126	C04148	HMDB06344	92258	1.76	1.02	0.95
1043			phenylacetylphenylalanine	LC/MS neg	40699			47583	1.95	1.57	1.15
1071	Carbohydrate	Glycolysis, Gluconeogenesis, and Pyruvate Metabolism	glucose	LC/MS polar	48152	C00031	HMDB00122	5793	5	30.92	0.81
1072			glucose 6-phosphate	LC/MS polar	31260	C00668	HMDB01401	5958	0.74	0.92	0.27
1073			glucose 1-phosphate	LC/MS polar	15561	C00103	HMDB01586	65533	0.44	0.14	0.11
1075			fructose-6-phosphate	LC/MS polar	12021	C05345	HMDB00124	69507	1	2.56	1
1077			fructose 1,6-bisphosphate	LC/MS neg	15926	C05378	HMDB01058	172313	1.64	1.27	0.58
1080			dihydroxyacetone phosphate (DHAP)	LC/MS pos early	15522	C00111	HMDB01473	668	1.02	1.15	0.87
1084			2-phosphoglycerate	LC/MS polar	35629	C00631	HMDB03391	59	1.88	0.88	0.79
1085			3-phosphoglycerate	LC/MS neg	1414	C00597	HMDB00807	724	2.85	2.21	1.13
1086			phosphoenolpyruvate (PEP)	LC/MS neg	597	C00074	HMDB00263	1005	3.39	2.35	1.38
1087			pyruvate	LC/MS neg	42582	C00022	HMDB00243	1060	1.41	1.88	0.92
1088			lactate	LC/MS polar	527	C00186	HMDB00190	612	0.86	0.82	0.82
1091			glycerate	LC/MS polar	1572	C00258	HMDB00139	752	1.33	0.91	0.78
1094		Pentose Phosphate Pathway	6-phosphogluconate	LC/MS neg	15442	C00345	HMDB01316	91493	1.86	0.81	0.45
1102			5-phosphoribosyl diphosphate (PRPP)	LC/MS neg	36840	C00119	HMDB00280	7339	0.24	0.1	0.25
1105			sedoheptulose-7-phosphate	LC/MS neg	35649	C05382	HMDB01068	616	0.75	0.81	0.37
1110		Pentose Metabolism	ribitol	LC/MS polar	15772	C00474	HMDB00508	6912	0.87	0.76	0.67
1111			ribonate	LC/MS polar	27731	C01685	HMDB00867	5460677	0.96	0.78	0.86
1112			ribulose/xylulose	LC/MS polar	54671			5289590	2.45	2.94	1.46
1125			arabitol/xylitol	LC/MS polar	48885	C01904		6912	1.12	0.8	0.8
1131			arabonate/xylonate	LC/MS polar	48255				0.9	0.75	0.91
1134			sedoheptulose	LC/MS polar	53237		HMDB03219	5459879	1.41	1.41	1.15
1135			ribulonate/xylulonate/lyxonate*	LC/MS polar	61858				1.62	1.99	0.95
1170		Disaccharides and Oligosaccharides	sucrose	LC/MS polar	1519	C00089	HMDB00258	5988	8.58	8.06	3.98
1172			trehalose	LC/MS polar	15573	C01083	HMDB00975	7427	1.6	3.38	2.08
1173			trehalose 6-phosphate	LC/MS polar	36828	C00689	HMDB01124	122336	1.04	1.59	0.07
1189		Fructose, Mannose and Galactose Metabolism	fructose	LC/MS polar	48195	C00095	HMDB00660	5984	6.45	6.46	1.25
1194			mannitol/sorbitol	LC/MS polar	46142	C00794	HMDB00247	5780	1.22	1.57	0.88
1196			mannose-6-phosphate	LC/MS polar	1469	C00275	HMDB01078	439198	0.65	0.65	0.26
1206			galactose 1-phosphate	LC/MS polar	15706	C00446	HMDB00645	123912	0.52	0.16	0.14
1215			galactonate	LC/MS polar	27719	C00880	HMDB00565	128869	0.61	0.77	0.77
1222		Nucleotide Sugar	UDP-glucose	LC/MS polar	32344	C00029	HMDB00286	8629	0.57	0.28	0.23
1226			UDP-galactose	LC/MS polar	15860	C00052	HMDB00302	18068	0.54	0.33	0.39
1234			UDP-N-acetylglucosamine/galactosamine	LC/MS polar	46148				0.44	0.31	0.28
1243		Aminosugar Metabolism	glucosamine-6-phosphate	LC/MS polar	580	C00352	HMDB01254	439217	0.82	0.91	0.29
1252			N-acetylglucosamine 6-phosphate	LC/MS polar	15107	C00357	HMDB02817	439219	0.34	0.21	0.26
1253			N-acetyl-glucosamine 1-phosphate	LC/MS polar	15741	C04256	HMDB01367	440364	0.08	0.04	0.23
1259			N-acetylneuraminate	LC/MS pos early	32377	C00270	HMDB00230	439197	1.49	1.34	0.8
1262			N-acetylmuramate	LC/MS pos early	33421	C02713	HMDB60493	5462244	0.79	0.29	0.67
1271			erythronate*	LC/MS polar	42420		HMDB00613	2781043	1.06	0.78	0.81
1273			N-acetylglucosamine/N-acetylgalactosamine	LC/MS pos early	46539		HMDB00215	24139	0.19	0.33	0.17
1275		Advanced Glycation End-product	N6-carboxymethyllysine	LC/MS pos early	36713			123800	0.91	0.64	0.63
1279	Energy	TCA Cycle	citrate	LC/MS neg	1564	C00158	HMDB00094	311	0.35	0.33	0.36
1281			aconitate [cis or trans]	LC/MS neg	46173				0.34	0.3	0.26
1283			isocitrate	LC/MS polar	12110	C00311	HMDB00193	1198	0.2	0.12	0.21
1285			alpha-ketoglutarate	LC/MS polar	528	C00026	HMDB00208	51	0.59	0.39	0.54
1288			succinate	LC/MS polar	1437	C00042	HMDB00254	1110	0.99	0.54	0.66
1289			fumarate	LC/MS polar	1643	C00122	HMDB00134	444972	0.6	0.6	0.51
1291			malate	LC/MS neg	1303	C00149	HMDB00156	525	0.69	0.75	0.52
1298			2-methylcitrate	LC/MS polar	37483	C02225	HMDB00379	439681	0.55	0.1	0.58
1300			citraconate/glutaconate	LC/MS polar	47076				1.01	0.81	0.76
1304		Oxidative Phosphorylation	acetylphosphate	LC/MS polar	15488	C00227	HMDB01494	186	1.02	0.74	0.45
1306			phosphate	LC/MS pos early	42109	C00009	HMDB01429	1061	1.02	0.57	0.75
1309	Lipid	Fatty Acid Synthesis	malonate	LC/MS polar	15872	C00383	HMDB00691	867	0.81	0.4	0.48
1311		Fatty Acid Metabolism	acetyl CoA	LC/MS neg	43840	C00024	HMDB01206	444493	0.2	0.17	0.3
1323		Short Chain Fatty Acid	butyrate (4:0)	LC/MS neg	40605	C00246	HMDB00039	264	1.76	0.69	0.78
1324			valerate (5:0)	LC/MS neg	33443	C00803	HMDB00892	7991	0.77	0.48	0.63
1325		Medium Chain Fatty Acid	caproate (6:0)	LC/MS neg	32489	C01585	HMDB00535	8892	1	0.58	0.35
1326			heptanoate (7:0)	LC/MS neg	1644	C17714	HMDB00666	8094	0.96	0.62	0.48
1327			caprylate (8:0)	LC/MS neg	32492	C06423	HMDB00482	379	1	0.96	0.34
1328			pelargonate (9:0)	LC/MS neg	12035	C01601	HMDB00847	8158	1.13	1.1	0.64
1329			caprate (10:0)	LC/MS neg	1642	C01571	HMDB00511	2969	1.53	1.41	0.58
1334			laurate (12:0)	LC/MS neg	1645	C02679	HMDB00638	3893	1.15	0.99	1.2
1335			5-dodecenoate (12:1n7)	LC/MS neg	33968		HMDB00529	5312378	3.26	0.67	0.41
1338		Long Chain Saturated Fatty Acid	myristate (14:0)	LC/MS neg	1365	C06424	HMDB00806	11005	1.5	0.6	0.97
1339			pentadecanoate (15:0)	LC/MS neg	1361	C16537	HMDB00826	13849	2.73	0.79	1.05
1340			palmitate (16:0)	LC/MS neg	1336	C00249	HMDB00220	985	0.99	0.32	0.4
1341			margarate (17:0)	LC/MS neg	1121		HMDB02259	10465	1.55	0.42	0.66
1342			stearate (18:0)	LC/MS neg	1358	C01530	HMDB00827	5281	0.74	0.31	0.37
1343			nonadecanoate (19:0)	LC/MS neg	1356	C16535	HMDB00772	12591	1.29	0.42	0.57
1344			arachidate (20:0)	LC/MS neg	1118	C06425	HMDB02212	10467	0.6	0.2	0.21
1346			behenate (22:0)*	LC/MS neg	12125	C08281	HMDB00944	8215	0.72	0.21	0.18
1351		Long Chain Monounsaturated Fatty Acid	myristoleate (14:1n5)	LC/MS neg	32418	C08322	HMDB02000	5281119	8.51	3.27	2.7
1354			palmitoleate (16:1n7)	LC/MS neg	33447	C08362	HMDB03229	445638	5.8	1.37	2.13
1356			10-heptadecenoate (17:1n7)	LC/MS neg	33971		HMDB60038	5312435	5.5	0.95	1.79
1358			oleate/vaccenate (18:1)	LC/MS neg	52285				3.8	0.74	0.95
1364			10-nonadecenoate (19:1n9)	LC/MS neg	33972		HMDB13622	5312513	3.87	0.88	1.24
1367			eicosenoate (20:1)	LC/MS neg	33587	C16526	HMDB02231	5282768	2.31	0.51	0.67
1371			erucate (22:1n9)	LC/MS neg	1552	C08316	HMDB02068	5281116	0.36	0.12	0.16
1374		Long Chain Polyunsaturated Fatty Acid (n3 and n6)	tetradecadienoate (14:2)*	LC/MS neg	62850		HMDB00560	5312409	18.25	1.2	0.79
1381			stearidonate (18:4n3)	LC/MS neg	33969	C16300	HMDB06547	5312508	1.65	7.28	8.72
1384			eicosapentaenoate (EPA; 20:5n3)	LC/MS neg	18467	C06428	HMDB01999	446284	0.38	0.66	0.84
1386			docosapentaenoate (n3 DPA; 22:5n3)	LC/MS neg	32504	C16513	HMDB06528	6441454	0.83	0.22	0.23
1387			docosahexaenoate (DHA; 22:6n3)	LC/MS neg	44675	C06429	HMDB02183	445580	1	0.18	0.21
1391			linoleate (18:2n6)	LC/MS neg	1105	C01595	HMDB00673	5280450	4.89	0.88	1.4
1393			linolenate [alpha or gamma; (18:3n3 or 6)]	LC/MS neg	34035	C06426	HMDB03073	5280934	0.49	0.19	0.32
1394			dihomo-linoleate (20:2n6)	LC/MS neg	17805	C16525	HMDB05060	6439848	3.36	0.79	1.16
1396			dihomo-linolenate (20:3n3 or n6)	LC/MS neg	35718	C03242	HMDB02925	5280581	0.19	0.1	0.16
1397			arachidonate (20:4n6)	LC/MS neg	1110	C00219	HMDB01043	444899	0.25	0.28	0.37
1480		Fatty Acid, Dicarboxylate	glutarate (C5-DC)	LC/MS polar	396	C00489	HMDB00661	743	1.06	0.61	0.65
1484			2-hydroxyglutarate	LC/MS pos early	37253	C02630	HMDB0059655	43	1.38	0.87	0.86
1485			4-hydroxy-2-oxoglutaric acid	LC/MS polar	40062	C01127	HMDB02070	599	0.59	0.62	0.54
1488			2-hydroxyadipate	LC/MS polar	31934	C02360	HMDB00321	193530	2.42	0.9	0.75
1489			3-hydroxyadipate*	LC/MS polar	62069		HMDB00345	151913	0.55	0.31	0.39
1492			maleate	LC/MS polar	20676	C01384	HMDB00176	444266	0.37	0.75	0.67
1497			suberate (C8-DC)	LC/MS polar	15730	C08278	HMDB00893	10457	1.06	0.89	0.83
1500			azelate (C9-DC)	LC/MS neg	18362	C08261	HMDB00784	2266	1.57	0.96	0.83
1502			sebacate (C10-DC)	LC/MS neg	32398	C08277	HMDB00792	5192	1.72	0.7	0.76
1512			tetradecanedioate (C14-DC)	LC/MS neg	35669		HMDB00872	13185	0.84	0.88	1.01
1517			hexadecenedioate (C16:1-DC)*	LC/MS neg	61862				1.02	0.77	0.81
1530			2-hydroxysebacate	LC/MS neg	63357		HMDB00424	128458	1.4	0.95	0.96
1571		Fatty Acid, Amino	2-aminoheptanoate	LC/MS pos early	43761			227939	0.55	0.84	0.99
1589		Fatty Acid Metabolism (also BCAA Metabolism)	butyrylcarnitine (C4)	LC/MS pos early	32412	C02862	HMDB02013	439829	3.51	1.73	1.92
1590			butyrylglycine	LC/MS neg	31850		HMDB00808	88412	2.63	1.59	1.26
1592			propionylcarnitine (C3)	LC/MS pos early	32452	C03017	HMDB00824	107738	1.82	0.63	0.46
1614		Fatty Acid Metabolism (Acyl Glycine)	N-octanoylglycine	LC/MS neg	43502		HMDB00832	84290	1.34	1.35	1.28
1615			N-palmitoylglycine	LC/MS neg	42092		HMDB13034	151008	0.18	0.09	0.13
1617			N-oleoylglycine	LC/MS neg	40467		HMDB13631	6436908	0.84	0.09	0.14
1629		Fatty Acid Metabolism (Acyl Carnitine, Short Chain)	acetylcarnitine (C2)	LC/MS pos early	32198	C02571	HMDB00201	1	0.91	0.57	0.46
1691		Fatty Acid Metabolism (Acyl Carnitine, Hydroxy)	(S)-3-hydroxybutyrylcarnitine	LC/MS pos early	52984		HMDB13127		0.01	0.02	0.02
1698		Carnitine Metabolism	deoxycarnitine	LC/MS pos early	36747	C01181	HMDB01161	134	0.81	0.47	0.41
1699			carnitine	LC/MS pos early	15500	C00318	HMDB00062	10917	1	0.49	0.53
1705		Ketone Bodies	3-hydroxybutyrate (BHBA)	LC/MS polar	542	C01089	HMDB00357	441	1.11	0.78	0.64
1706		Neurotransmitter	acetylcholine	LC/MS pos early	18790	C01996	HMDB00895		2.03	1.01	0.97
1709		Fatty Acid Metabolism (Acyl Choline)	palmitoylcholine	LC/MS pos late	52944			151731	1	1.75	0.69
1710			oleoylcholine	LC/MS pos late	53260				2.13	3.2	0.7
1711			palmitoloelycholine	LC/MS pos late	53257				1	2.81	0.51
1714			linoleoylcholine*	LC/MS pos late	57463				1.23	2.51	0.67
1723		Fatty Acid, Monohydroxy	4-hydroxybutyrate (GHB)	LC/MS polar	34585	C00989	HMDB00710	10413	1.46	0.75	0.85
1730			2-hydroxypalmitate	LC/MS neg	35675		HMDB31057	92836	1.02	0.5	0.3
1731			2-hydroxyoleate	LC/MS neg	54920			9796304	3.24	0.82	1.29
1732			2-hydroxystearate	LC/MS neg	17945	C03045		69417	0.53	0.18	0.3
1739			3-hydroxyhexanoate	LC/MS neg	53230			151492	1.35	0.79	0.68
1740			3-hydroxyoctanoate	LC/MS neg	22001		HMDB01954	26613	0.53	0.41	0.58
1742			3-hydroxydecanoate	LC/MS neg	22053		HMDB02203	26612	0.25	0.23	0.2
1745			3-hydroxylaurate	LC/MS neg	32457		HMDB00387	94216	0.3	0.26	0.27
1749			3-hydroxyoleate*	LC/MS neg	61843				1.91	0.22	0.22
1753			5-hydroxyhexanoate	LC/MS neg	31938		HMDB00525	170748	1.5	0.9	0.89
1760			16-hydroxypalmitate	LC/MS neg	39609	C18218	HMDB06294	10466	1.59	1.48	0.91
1764			13-HODE + 9-HODE	LC/MS neg	37752			43013	11.25	3.39	1.57
1778			3-hydroxystearate	LC/MS neg	52938			5282907	0.24	0.05	0.05
1792		Fatty Acid, Dihydroxy	2S,3R-dihydroxybutyrate	LC/MS polar	62950		HMDB02453	10964471	1.29	0.94	0.88
1793			2R,3R-dihydroxybutyrate	LC/MS polar	63109		HMDB00498		1.95	1.12	1.11
1795			2,4-dihydroxybutyrate	LC/MS polar	62951		HMDB00360	192742	1.26	0.89	0.84
1796			3,4-dihydroxybutyrate	LC/MS polar	62952				1.18	0.85	0.61
1896		Endocannabinoid	oleoyl ethanolamide	LC/MS pos late	38102		HMDB02088	5283454	1.39	2.63	1.33
1909			N-oleoyltaurine	LC/MS neg	39732			6437033	0.81	0.23	0.36
1910			N-stearoyltaurine	LC/MS neg	39730			168274	0.53	0.13	0.24
1911			N-palmitoyltaurine	LC/MS neg	39835				0.38	0.19	0.3
1926			palmitoleoyl ethanolamide*	LC/MS pos late	57541		HMDB13648	9835868	1.09	1.22	1.12
1936		Inositol Metabolism	myo-inositol	LC/MS polar	1124	C00137	HMDB00211	892	1.25	1.18	1.58
1937			chiro-inositol	LC/MS polar	37112	C19891	HMDB34220		1.18	0.56	0.86
1945			inositol 1-phosphate (I1P)	LC/MS polar	43849	C01177	HMDB00213	440194	1.22	0.53	1.01
1965		Phospholipid Metabolism	choline	LC/MS pos early	15506	C00114	HMDB00097	305	0.63	0.59	0.41
1966			choline phosphate	LC/MS pos early	34396	C00588	HMDB01565	1014	0.32	0.14	0.11
1967			cytidine 5'-diphosphocholine	LC/MS pos early	34418	C00307	HMDB01413	13804	0.52	0.28	0.57
1969			glycerophosphorylcholine (GPC)	LC/MS pos early	15990	C00670	HMDB00086	71920	1.24	1.03	0.9
1970			ethanolamine	LC/MS pos early	1497	C00189	HMDB00149	700	1.08	1.02	0.87
1971			phosphoethanolamine	LC/MS pos early	1600	C00346	HMDB00224	1015	0.41	0.2	0.27
1972			cytidine-5'-diphosphoethanolamine	LC/MS polar	34410	C00570	HMDB01564	123727	1.02	0.48	0.65
1973			glycerophosphoethanolamine	LC/MS polar	37455	C01233	HMDB00114	123874	1.42	1.26	1.11
1974			glycerophosphoserine*	LC/MS pos early	57404			3081457	6.01	3.87	2.41
1975			glycerophosphoinositol*	LC/MS polar	47155			167572	1.28	0.69	0.45
1976			trimethylamine N-oxide	LC/MS pos early	40406	C01104	HMDB00925	1145	0.03	0.03	0.03
1977		Phosphatidic acid (PA)	1-palmitoyl-2-oleoyl-GPA (16:0/18:1)	LC/MS pos late	19262	C13889		5283523	0.27	0.61	0.65
1994		Phosphatidylcholine (PC)	1-myristoyl-2-palmitoyl-GPC (14:0/16:0)	LC/MS pos late	19258		HMDB07869	129657	0.06	0.03	0.13
1998			1-myristoyl-2-arachidonoyl-GPC (14:0/20:4)*	LC/MS pos late	53195		HMDB07883		0.17	0.11	0.3
2010			1,2-dipalmitoyl-GPC (16:0/16:0)	LC/MS pos late	19130		HMDB00564	452110	0.86	0.49	0.35
2011			1-palmitoyl-2-palmitoleoyl-GPC (16:0/16:1)*	LC/MS pos late	52470		HMDB07969		0.08	0.06	0.08
2012			1-palmitoyl-2-stearoyl-GPC (16:0/18:0)	LC/MS pos late	52616		HMDB07970		0.75	0.31	0.2
2014			1-palmitoyl-2-oleoyl-GPC (16:0/18:1)	LC/MS pos late	52461		HMDB07972	6436017	0.12	0.08	0.11
2017			1-palmitoyl-2-linoleoyl-GPC (16:0/18:2)	LC/MS pos late	42446		HMDB07973	5287971	1	1	1
2019			1-palmitoyl-2-alpha-linolenoyl-GPC (16:0/18:3n3)*	LC/MS pos late	52684		HMDB07975		1	1	1
2028			1-palmitoyl-2-arachidonoyl-GPC (16:0/20:4n6)	LC/MS pos late	52462		HMDB07982	10747814	0.2	0.15	0.15
2035			1,2-dipalmitoleoyl-GPC (16:1/16:1)*	LC/MS pos late	52472				0.11	0.1	0.12
2039			1-palmitoleoyl-2-oleoyl-GPC (16:1/18:1)*	LC/MS pos late	52458				0.38	0.3	0.38
2040			1-palmitoleoyl-2-linoleoyl-GPC (16:1/18:2)*	LC/MS pos late	52683		HMDB08006		0.23	0.18	0.19
2041			1-palmitoleoyl-2-linolenoyl-GPC (16:1/18:3)*	LC/MS pos late	53180		HMDB08008		0.02	0.02	0.03
2051			1-stearoyl-2-oleoyl-GPC (18:0/18:1)	LC/MS pos late	52438		HMDB08038		0.28	0.27	0.31
2054			1-stearoyl-2-linoleoyl-GPC (18:0/18:2)*	LC/MS pos late	52452		HMDB08039		0.7	0.41	0.4
2073			1,2-dioleoyl-GPC (18:1/18:1)	LC/MS pos late	52457			10350317	0.89	0.73	0.94
2076			1-oleoyl-2-linoleoyl-GPC (18:1/18:2)*	LC/MS pos late	52453				0.66	0.5	0.59
2087			1,2-dilinoleoyl-GPC (18:2/18:2)	LC/MS pos late	52603		HMDB08138	5288075	0.19	0.16	0.18
2088			1-linoleoyl-2-linolenoyl-GPC (18:2/18:3)*	LC/MS pos late	53176		HMDB08141		0.01	0.02	0.02
2092			1-linoleoyl-2-arachidonoyl-GPC (18:2/20:4n6)*	LC/MS pos late	52710		HMDB08147		0.69	0.21	0.24
2130		Phosphatidylethanolamine (PE)	1,2-dipalmitoyl-GPE (16:0/16:0)*	LC/MS pos late	57341		HMDB08923	445468	0.38	0.24	0.19
2134			1-palmitoyl-2-oleoyl-GPE (16:0/18:1)	LC/MS pos late	19263		HMDB05320	5283496	0.43	0.27	0.36
2136			1-palmitoyl-2-linoleoyl-GPE (16:0/18:2)	LC/MS pos late	42449		HMDB05322	9546747	0.35	0.2	0.26
2142			1,2-dipalmitoleoyl-GPE (16:1/16:1)*	LC/MS pos late	52688		HMDB05342	9546809	0.32	0.2	0.22
2143			1-palmitoleoyl-2-oleoyl-GPE (16:1/18:1)*	LC/MS pos late	52469				0.66	0.55	0.62
2148			1-stearoyl-2-oleoyl-GPE (18:0/18:1)	LC/MS pos late	42448		HMDB08993		0.36	0.26	0.35
2151			1-stearoyl-2-linoleoyl-GPE (18:0/18:2)*	LC/MS pos late	52446		HMDB08994	9546749	0.75	0.48	0.61
2161			1,2-dioleoyl-GPE (18:1/18:1)	LC/MS pos late	52609			9546757	1.25	1.03	1.26
2162			1-oleoyl-2-linoleoyl-GPE (18:1/18:2)*	LC/MS pos late	52687		HMDB05349	9546753	0.79	0.63	0.83
2216		Phosphatidylserine (PS)	1-palmitoyl-2-oleoyl-GPS (16:0/18:1)	LC/MS pos late	19261	C13880	HMDB12357	5283499	1.46	1.6	1.73
2227			1,2-dioleoyl-GPS (18:1/18:1)	LC/MS pos late	19191			6438639	6.8	7.91	6.13
2230		Phosphatidylglycerol (PG)	1,2-dipalmitoyl-GPG (16:0/16:0)	LC/MS pos late	52625		HMDB10570	11846227	1	0.55	0.14
2234			1-palmitoyl-2-oleoyl-GPG (16:0/18:1)	LC/MS pos late	52448			5283509	1	0.56	0.59
2241			1-stearoyl-2-oleoyl-GPG (18:0/18:1)	LC/MS pos late	52623				0.65	0.35	1.02
2248		Phosphatidylinositol (PI)	1-palmitoyl-2-oleoyl-GPI (16:0/18:1)*	LC/MS polar	52669		HMDB09783		1.11	0.91	1.03
2255			1-stearoyl-2-oleoyl-GPI (18:0/18:1)*	LC/MS pos late	52726				2.3	1.99	2.37
2257			1,2-dioleoyl-GPI (18:1/18:1)	LC/MS polar	52619		HMDB09837		3.29	2.39	2.54
2290		Lysophospholipid	1-palmitoyl-GPA (16:0)	LC/MS pos late	34428	C04036	HMDB00327	6419701	5.82	5.52	7.59
2291			1-palmitoleoyl-GPA (16:1)*	LC/MS polar	52691				2.41	0.89	1.19
2305			1-palmitoyl-GPC (16:0)	LC/MS pos late	33955		HMDB10382	86554	0.28	0.17	0.15
2306			2-palmitoyl-GPC (16:0)*	LC/MS pos late	35253		HMDB61702	15061532	0.29	0.1	0.12
2307			1-palmitoleoyl-GPC (16:1)*	LC/MS pos late	33230		HMDB10383	24779461	0.42	0.21	0.19
2308			2-palmitoleoyl-GPC (16:1)*	LC/MS pos late	35819		HMDB10383		0.1	0.04	0.05
2314			1-stearoyl-GPC (18:0)	LC/MS pos late	33961		HMDB10384	497299	0.36	0.21	0.17
2316			1-oleoyl-GPC (18:1)	LC/MS pos late	48258		HMDB02815	16081932	1.31	0.73	0.59
2319			1-linoleoyl-GPC (18:2)	LC/MS pos late	34419	C04100	HMDB10386	11988421	0.49	0.24	0.19
2321			1-linolenoyl-GPC (18:3)*	LC/MS pos late	45951		HMDB10388		0.67	0.36	0.41
2337			1-arachidonoyl-GPC (20:4n6)*	LC/MS pos late	33228	C05208	HMDB10395		1.76	0.94	0.83
2359			1-palmitoyl-GPE (16:0)	LC/MS pos late	35631		HMDB11503	9547069	2.01	0.92	0.96
2366			1-stearoyl-GPE (18:0)	LC/MS pos late	42398		HMDB11130	9547068	1.39	0.62	0.53
2367			2-stearoyl-GPE (18:0)*	LC/MS neg	41220		HMDB11129		0.32	0.06	0.11
2368			1-oleoyl-GPE (18:1)	LC/MS pos late	35628		HMDB11506	9547071	4.05	1.8	1.7
2370			1-linoleoyl-GPE (18:2)*	LC/MS pos late	36600		HMDB11507	52925130	2.29	0.89	0.85
2396			1-palmitoyl-GPS (16:0)*	LC/MS neg	46130			9547100	13.36	2.6	2.43
2397			1-stearoyl-GPS (18:0)*	LC/MS neg	45966			9547101	13.95	2.31	1.69
2398			1-oleoyl-GPS (18:1)	LC/MS neg	19260		HMDB61694	9547099	9.37	2.85	4.08
2400			1-linoleoyl-GPS (18:2)*	LC/MS neg	43676				8.46	2.08	3.12
2403			1-palmitoyl-GPG (16:0)*	LC/MS neg	45970			3300276	4.28	0.56	0.76
2405			1-stearoyl-GPG (18:0)	LC/MS neg	34437				1.68	0.31	0.52
2407			1-oleoyl-GPG (18:1)*	LC/MS neg	45968				1.74	0.25	0.41
2409			1-linoleoyl-GPG (18:2)*	LC/MS neg	54885				1.54	0.27	0.39
2410			1-palmitoyl-GPI (16:0)	LC/MS neg	35305		HMDB61695		8.98	1.89	2.06
2413			1-stearoyl-GPI (18:0)	LC/MS neg	19324		HMDB61696		7.93	0.9	1.14
2415			1-oleoyl-GPI (18:1)	LC/MS neg	36602				6.62	1.31	2.14
2417			1-linoleoyl-GPI (18:2)*	LC/MS neg	36594				7.51	1.43	2.62
2531		Glycerolipid Metabolism	glycerol	LC/MS neg	15122	C00116	HMDB00131	753	2.06	1.03	1.18
2532			glycerol 3-phosphate	LC/MS pos early	43847	C00093	HMDB00126	754	1.28	0.89	0.68
2537			glycerophosphoglycerol	LC/MS polar	48857	C03274		439964	4.96	2.44	2.13
2542		Monoacylglycerol	1-palmitoleoylglycerol (16:1)*	LC/MS neg	52431		HMDB11565		0.36	0.14	0.21
2545			1-oleoylglycerol (18:1)	LC/MS neg	21184		HMDB11567	5283468	0.69	0.14	0.3
2546			1-linoleoylglycerol (18:2)	LC/MS neg	27447			5283469	0.66	0.27	0.24
2557			2-palmitoylglycerol (16:0)	LC/MS neg	33419		HMDB11533	123409	0.36	0.33	1.07
2560			2-oleoylglycerol (18:1)	LC/MS neg	21232		HMDB11537	5319879	0.37	0.08	0.16
2574		Diacylglycerol	diacylglycerol (12:0/18:1, 14:0/16:1, 16:0/14:1) [1]*	LC/MS pos late	55002				0.22	0.29	0.29
2575			diacylglycerol (12:0/18:1, 14:0/16:1, 16:0/14:1) [2]*	LC/MS pos late	55001				0.05	0.08	0.09
2576			diacylglycerol (14:0/18:1, 16:0/16:1) [1]*	LC/MS pos late	54953				0.33	0.29	0.25
2577			diacylglycerol (14:0/18:1, 16:0/16:1) [2]*	LC/MS pos late	54954				0.11	0.1	0.1
2578			diacylglycerol (16:1/18:2 [2], 16:0/18:3 [1])*	LC/MS pos late	54966				0.15	0.15	0.09
2585			palmitoyl-myristoyl-glycerol (16:0/14:0) [1]*	LC/MS pos late	61709				0.78	0.23	0.11
2586			palmitoyl-myristoyl-glycerol (16:0/14:0) [2]	LC/MS pos late	57364		HMDB07095		0.05	0.02	0.02
2587			myristoyl-linoleoyl-glycerol (14:0/18:2) [1]*	LC/MS pos late	57407				1	1	1.34
2588			myristoyl-linoleoyl-glycerol (14:0/18:2) [2]*	LC/MS pos late	57408				0.15	0.17	0.16
2589			palmitoyl-palmitoyl-glycerol (16:0/16:0) [1]*	LC/MS pos late	54991		HMDB07098		0.2	0.06	0.05
2590			palmitoyl-palmitoyl-glycerol (16:0/16:0) [2]*	LC/MS pos late	54990		HMDB07098		0.06	0.04	0.03
2591			palmitoleoyl-palmitoleoyl-glycerol (16:1/16:1) [1]*	LC/MS pos late	57410				0.43	0.52	0.25
2592			palmitoleoyl-palmitoleoyl-glycerol (16:1/16:1) [2]*	LC/MS pos late	57409				0.1	0.12	0.07
2593			palmitoyl-oleoyl-glycerol (16:0/18:1) [1]*	LC/MS pos late	54943	C13861	HMDB07102		0.52	0.45	0.4
2594			palmitoyl-oleoyl-glycerol (16:0/18:1) [2]*	LC/MS pos late	54942	C13861	HMDB07102		0.21	0.19	0.19
2595			palmitoyl-linoleoyl-glycerol (16:0/18:2) [1]*	LC/MS pos late	52633		HMDB07103	9543695	0.6	0.33	0.78
2596			palmitoyl-linoleoyl-glycerol (16:0/18:2) [2]*	LC/MS pos late	52634		HMDB07103		0.23	0.21	0.18
2598			palmitoleoyl-oleoyl-glycerol (16:1/18:1) [1]*	LC/MS pos late	52632		HMDB07131	9543694	0.73	0.76	0.46
2599			palmitoleoyl-oleoyl-glycerol (16:1/18:1) [2]*	LC/MS pos late	52631				0.19	0.19	0.16
2600			palmitoleoyl-linoleoyl-glycerol (16:1/18:2) [1]*	LC/MS pos late	54967		HMDB07132		0.53	0.5	0.28
2609			stearoyl-linoleoyl-glycerol (18:0/18:2) [2]*	LC/MS pos late	54947				0.2	0.18	0.16
2611			oleoyl-oleoyl-glycerol (18:1/18:1) [1]*	LC/MS pos late	54945		HMDB07218		1.31	1.5	1.05
2612			oleoyl-oleoyl-glycerol (18:1/18:1) [2]*	LC/MS pos late	54946		HMDB07218		0.47	0.52	0.4
2614			oleoyl-linoleoyl-glycerol (18:1/18:2) [1]	LC/MS pos late	46798		HMDB07219		1.01	1.05	0.66
2615			oleoyl-linoleoyl-glycerol (18:1/18:2) [2]	LC/MS pos late	46799		HMDB07219		0.35	0.37	0.26
2619			linoleoyl-linoleoyl-glycerol (18:2/18:2) [1]*	LC/MS pos late	54968		HMDB07248		0.66	0.67	0.39
2620			linoleoyl-linoleoyl-glycerol (18:2/18:2) [2]*	LC/MS pos late	54969		HMDB07248		0.15	0.16	0.11
2621			linoleoyl-linolenoyl-glycerol (18:2/18:3) [1]*	LC/MS pos late	54963		HMDB07249		0.03	0.05	0.03
2622			linoleoyl-linolenoyl-glycerol (18:2/18:3) [2]*	LC/MS pos late	54964		HMDB07250		0.03	0.03	0.03
2624			linolenoyl-linolenoyl-glycerol (18:3/18:3) [2]*	LC/MS pos late	54952		HMDB07278		0.79	0.56	0.58
2627			oleoyl-arachidonoyl-glycerol (18:1/20:4) [1]*	LC/MS pos late	54960		HMDB07228		1	0.82	0.19
2628			oleoyl-arachidonoyl-glycerol (18:1/20:4) [2]*	LC/MS pos late	54961		HMDB07228		1	0.2	0.11
2683		Sphingolipid Synthesis	3-ketosphinganine	LC/MS pos late	34381	C02934	HMDB01480	631	2.92	4.06	2.36
2684			sphinganine	LC/MS pos late	17769	C00836	HMDB00269	3126	9.12	5.25	1.33
2685			sphinganine-1-phosphate	LC/MS pos late	52605		HMDB01383	520	2.29	7.25	2.72
2687			phytosphingosine	LC/MS pos late	1510	C12144	HMDB04610	122121	4.97	3.52	1.05
2690		Dihydroceramides	N-palmitoyl-sphinganine (d18:0/16:0)	LC/MS pos late	52604		HMDB11760	5283572	2.13	1	0.81
2835		Sphingosines	sphingosine	LC/MS pos late	17747	C00319	HMDB00252	5353955	4.51	5.27	2.07
2851		Mevalonate Metabolism	3-hydroxy-3-methylglutaryl CoA	LC/MS neg	48010	C00356	HMDB01375	84	0.51	0.21	0.06
2853			3-hydroxy-3-methylglutarate	LC/MS polar	531	C03761	HMDB00355	1662	0.58	0.45	0.53
2854			mevalonate	LC/MS polar	39583	C02104	HMDB00227	439230	1.53	0.57	0.81
2855			mevalonolactone	LC/MS pos early	48118		HMDB06024	10428	2.09	0.7	0.83
2899		Sterol	fucosterol	LC/MS pos late	21187	C08817	HMDB02374	5281328	1.71	1.26	1.48
2900			ergosterol	LC/MS pos late	27553	C01694	HMDB00878	444679	1.81	1.7	1.99
3074		Primary Bile Acid Metabolism	cholate	LC/MS neg	22842	C00695	HMDB00619	221493	1.58	1.16	1.01
3075			glycocholate	LC/MS neg	18476	C01921	HMDB00138	10140	1.39	0.97	0.93
3076			taurocholate	LC/MS neg	18497	C05122	HMDB00036	6675	1.34	0.95	0.89
3077			chenodeoxycholate	LC/MS neg	1563	C02528	HMDB00518	10133	3.32	1.55	1.35
3082			glycochenodeoxycholate	LC/MS neg	32346	C05466	HMDB00637	12544	1.76	1.15	1.21
3083			taurochenodeoxycholate	LC/MS neg	18494	C05465	HMDB00951	387316	1.61	1.12	1.19
3099		Secondary Bile Acid Metabolism	deoxycholate	LC/MS neg	1114	C04483	HMDB00626	222528	2.46	1.23	1.12
3105			glycodeoxycholate	LC/MS neg	18477	C05464	HMDB00631	3035026	1.66	1.11	1.03
3106			taurodeoxycholate	LC/MS neg	12261	C05463	HMDB00896	2733768	1.7	1.05	1.03
3109			6-beta-hydroxylithocholate	LC/MS neg	36807	C15515	HMDB00811	5283821	4.44	3.27	3.76
3110			lithocholate	LC/MS neg	1483	C03990	HMDB00761	9903	2.05	3.01	2.41
3112			12-ketolithocholate	LC/MS neg	63118		HMDB00328	3080612	2.44	1.54	1.18
3115			glycolithocholate	LC/MS neg	31912	C15557	HMDB00698	115245	2.6	1.53	1.41
3117			taurolithocholate	LC/MS neg	31889	C02592	HMDB00722	10595	3.67	1.55	2.07
3120			ursodeoxycholate	LC/MS neg	1605	C07880	HMDB00946	31401	3.24	2	1.5
3129			glycoursodeoxycholate	LC/MS neg	39379		HMDB00708	12310288	2	1.33	1.47
3132			tauroursodeoxycholate	LC/MS neg	39378		HMDB00874	9848818	1.82	1.38	1.34
3137			6-oxolithocholate	LC/MS neg	46336			164960	3.41	1.3	1.25
3138			7-ketolithocholate	LC/MS neg	43830		HMDB00467	444262	3.77	1.87	1.58
3139			hyocholate	LC/MS neg	34093	C17649	HMDB00760	92805	1.67	1.38	1.66
3151			7-ketodeoxycholate	LC/MS neg	31904		HMDB00391	188292	1.54	1.13	0.99
3160			ursocholate	LC/MS neg	57573				1.52	1.15	0.98
3728	Nucleotide	Purine Metabolism, (Hypo)Xanthine/Inosine containing	inosine 5'-monophosphate (IMP)	LC/MS pos early	2133	C00130	HMDB00175	8582	0.03	0.19	0.03
3729			inosine	LC/MS neg	1123	C00294	HMDB00195	6021	1.88	1.32	0.44
3730			hypoxanthine	LC/MS neg	3127	C00262	HMDB00157	790	1.55	0.56	0.51
3731			xanthine	LC/MS polar	3147	C00385	HMDB00292	1188	0.89	0.54	0.65
3733			xanthosine	LC/MS neg	15136	C01762	HMDB00299	64959	1.12	0.93	0.81
3736			N1-methylinosine	LC/MS pos early	48351		HMDB02721	65095	1	0.5	0.46
3737			2'-deoxyinosine	LC/MS neg	15076	C05512	HMDB00071	65058	2.75	0.78	0.38
3741			allantoin	LC/MS polar	1107	C02350	HMDB00462	204	0.17	0.13	0.15
3746		Purine Metabolism, Adenine containing	adenosine 5'-diphosphate (ADP)	LC/MS polar	3108	C00008	HMDB01341	6022	0.07	0.06	0.1
3747			adenosine 5'-monophosphate (AMP)	LC/MS neg	32342	C00020	HMDB00045	6083	0.07	0.23	0.14
3748			adenosine 3'-monophosphate (3'-AMP)	LC/MS neg	35142	C01367	HMDB03540	41211	0.57	0.23	0.24
3749			adenosine 2'-monophosphate (2'-AMP)	LC/MS neg	36815	C00946	HMDB11617	94136	3.18	2.11	1.88
3750			adenosine 3',5'-cyclic monophosphate (cAMP)	LC/MS neg	2831	C00575	HMDB00058	6076	4.09	1.91	1.73
3752			adenosine 3',5'-diphosphate	LC/MS neg	15691	C00054	HMDB00061	159296	0.2	0.08	0.05
3753			adenylosuccinate	LC/MS neg	18360	C03794	HMDB00536	195	0.03	0.19	0.02
3754			adenosine	LC/MS pos early	555	C00212	HMDB00050	60961	0.23	0.28	0.47
3755			adenine	LC/MS pos early	554	C00147	HMDB00034	190	0.62	0.41	0.43
3756			1-methyladenine	LC/MS pos early	1527	C02216	HMDB11599	78821	1.04	0.35	0.42
3760			N1-methyladenosine	LC/MS pos early	15650	C02494	HMDB03331	27476	1.33	0.76	0.64
3763			2'-O-methyladenosine	LC/MS pos early	42607			102213	0.54	0.29	0.37
3771			N6-carbamoylthreonyladenosine	LC/MS neg	35157		HMDB41623	161466	1.53	1.13	1.29
3773			2'-deoxyadenosine 5'-diphosphate	LC/MS neg	15116	C00206	HMDB01508	188966	0.27	0.22	0.28
3774			2'-deoxyadenosine 5'-monophosphate	LC/MS neg	46333	C00360	HMDB00905	12599	0.02	0.08	0.02
3776			2'-deoxyadenosine	LC/MS pos early	1553	C00559	HMDB00101	13730	0.57	0.38	0.41
3781			N6-succinyladenosine	LC/MS neg	48130		HMDB00912	165243	0.05	0.22	0.09
3784		Purine Metabolism, Guanine containing	guanosine 5'- monophosphate (5'-GMP)	LC/MS pos early	2849	C00144	HMDB01397	6804	0.2	0.08	0.11
3785			guanosine 3'-monophosphate (3'-GMP)	LC/MS neg	39786			3522	0.41	0.16	0.17
3789			guanosine	LC/MS neg	1573	C00387	HMDB00133	6802	1.07	1.16	0.45
3790			guanine	LC/MS pos early	32352	C00242	HMDB00132	764	1.24	0.89	0.89
3792			7-methylguanine	LC/MS pos early	35114	C02242	HMDB00897	11361	1.28	0.77	0.74
3797			N2-methylguanosine	LC/MS neg	35133		HMDB05862	3035422	1.37	1	0.66
3798			N2,N2-dimethylguanosine	LC/MS pos early	35137		HMDB04824	92919	0.91	0.71	0.75
3806			2'-deoxyguanosine	LC/MS neg	1411	C00330	HMDB00085	187790	0.71	0.6	0.36
3807			guanosine 2'-monophosphate (2'-GMP)*	LC/MS neg	52442			444571	2.17	1.22	1.16
3809		Pyrimidine Metabolism, Orotate containing	N-carbamoylaspartate	LC/MS polar	1594	C00438	HMDB00828	93072	1	0.44	0.08
3810			dihydroorotate	LC/MS polar	601	C00337	HMDB03349	648	0.41	0.05	0.01
3811			orotate	LC/MS polar	1505	C00295	HMDB00226	967	0.11	0.08	0.01
3813			orotidine	LC/MS polar	35172		HMDB00788	92751	3.32	2.39	2.32
3816		Pyrimidine Metabolism, Uracil containing	uridine 5'-triphosphate (UTP)	LC/MS neg	33448	C00075	HMDB00285	6133	0.39	0.57	0.1
3818			uridine 5'-monophosphate (UMP)	LC/MS pos early	2856	C00105	HMDB00288	6030	0.72	0.62	0.56
3820			uridine 3'-monophosphate (3'-UMP)	LC/MS neg	39764	C01368		101543	0.45	0.19	0.22
3822			uridine-2',3'-cyclic monophosphate	LC/MS neg	37137	C02355	HMDB11640	439715	1.69	0.68	0.89
3823			uridine	LC/MS neg	606	C00299	HMDB00296	6029	1.59	1.99	0.88
3824			uracil	LC/MS polar	605	C00106	HMDB00300	1174	1.09	1.12	0.64
3825			pseudouridine	LC/MS neg	33442	C02067	HMDB00767	15047	0.76	0.66	0.6
3826			5,6-dihydrouridine	LC/MS neg	61833			94312	0.45	0.41	0.43
3827			2'-O-methyluridine	LC/MS neg	57655			102212	1.11	0.86	0.73
3828			5-methyluridine (ribothymidine)	LC/MS neg	35136		HMDB00884	445408	1.55	1.21	0.99
3839			2'-deoxyuridine	LC/MS neg	52602	C00526	HMDB00012	13712	0.53	0.48	0.51
3842			3-ureidopropionate	LC/MS polar	3155	C02642	HMDB00026	111	1.5	1.02	0.95
3843			beta-alanine	LC/MS pos early	55	C00099	HMDB00056	239	0.43	0.29	0.35
3846			uridine 2'-monophosphate (2'-UMP)*	LC/MS neg	52444				2.57	1.56	1.42
3848		Pyrimidine Metabolism, Cytidine containing	cytidine triphosphate	LC/MS neg	2844	C00063	HMDB00082	6176	0.49	0.22	0.18
3849			cytidine diphosphate	LC/MS neg	2841	C00112	HMDB01546	6132	0.34	0.2	0.16
3850			cytidine 5'-monophosphate (5'-CMP)	LC/MS pos early	2372	C00055	HMDB00095	6131	0.02	0.13	0.05
3852			cytidine 2' or 3'-monophosphate (2' or 3'-CMP)	LC/MS pos early	61705				1.06	0.7	0.58
3854			cytidine	LC/MS pos early	514	C00475	HMDB00089	6175	0.3	0.16	0.18
3855			cytosine	LC/MS pos early	573	C00380	HMDB00630	597	2.42	3.4	2.13
3857			5-methylcytidine	LC/MS pos early	22119		HMDB00982	92918	1.48	0.83	0.86
3862			2'-deoxycytidine 5'-monophosphate	LC/MS pos early	533	C00239	HMDB01202	13945	0.15	0.07	0.05
3863			2'-deoxycytidine 3'-monophosphate	LC/MS pos early	40453			3274948	0.37	0.29	0.36
3864			2'-deoxycytidine	LC/MS pos early	15949	C00881	HMDB00014	13711	1.48	3.43	2.68
3871		Pyrimidine Metabolism, Thymine containing	thymidine 5'-monophosphate	LC/MS neg	12023	C00364	HMDB01227	9700	0.03	0.1	0.03
3872			thymidine 3'-monophosphate	LC/MS neg	37122			5463	2.17	1.33	1.23
3875			thymidine	LC/MS neg	2183	C00214	HMDB00273	5789	1.19	0.9	0.84
3878			thymine	LC/MS neg	604	C00178	HMDB00262	1135	1.23	0.96	0.88
3881			3-aminoisobutyrate	LC/MS pos early	1566	C05145	HMDB03911	64956	0.24	0.18	0.27
3882		Purine and Pyrimidine Metabolism	methylphosphate	LC/MS pos early	37070		HMDB61711	13130	0.35	0.31	0.37
3883		Dinucleotide	(3'-5')-adenylylcytidine	LC/MS neg	52753			10875494	3.12	2.23	2.04
3884			(3'-5')-adenylylguanosine*	LC/MS neg	62760			444337	3.4	2.76	2.14
3885			(3'-5')-adenylyluridine	LC/MS neg	52740			112074	3.12	2.19	2.27
3886			(3'-5')-adenylyladenosine*	LC/MS neg	62396			94231	3.09	2.19	2.15
3887			(3'-5')-cytidylyladenosine	LC/MS neg	52744			91519	2.06	1.33	1.33
3888			(3'-5')-cytidylylcytidine*	LC/MS neg	62397			94237	1.89	1.36	1.3
3889			(3'-5')-cytidylylguanosine	LC/MS neg	52745			65101	2.13	1.59	1.24
3890			(3'-5')-cytidylyluridine*	LC/MS neg	62399				2.07	1.56	1.38
3891			(3'-5')-guanylyladenosine*	LC/MS neg	62761				1.91	1.44	1.25
3892			(3'-5')-guanylylcytidine	LC/MS neg	52746			107595	1.74	1.29	1.19
3893			(3'-5')-guanylyluridine	LC/MS neg	52743				2.32	1.81	1.61
3894			(3'-5')-uridylylcytidine*	LC/MS neg	62398				1.69	1.33	1.19
3895			(3'-5')-uridylylguanosine	LC/MS neg	52742			107394	1.78	1.4	1.13
3896			(3'-5')-uridylyluridine	LC/MS neg	52741			102258	1.56	1.23	1.16
3897			(3'-5')-uridylyladenosine	LC/MS neg	52739			273124	1.67	1.28	1.1
3898	Cofactors and Vitamins	Nicotinate and Nicotinamide Metabolism	quinolinate	LC/MS polar	1899	C03722	HMDB00232	1066	0.3	0.25	0.17
3899			nicotinate	LC/MS pos early	1504	C00253	HMDB01488	938	1.14	0.96	0.88
3900			nicotinate ribonucleoside	LC/MS pos early	33471	C05841	HMDB06809	161234	1.97	1.19	1.17
3901			nicotinic acid mononucleotide (NaMN)	LC/MS pos early	32461	C01185	HMDB01132	5288991	0.81	1.08	0.83
3902			nicotinamide	LC/MS pos early	594	C00153	HMDB01406	936	0.68	0.37	0.49
3904			nicotinamide ribonucleotide (NMN)	LC/MS pos early	22152	C00455	HMDB00229	14180	0.27	0.27	0.28
3905			nicotinamide riboside	LC/MS pos early	33013	C03150	HMDB00855	439924	0.03	0.35	0.62
3906			nicotinamide adenine dinucleotide (NAD+)	LC/MS neg	5278	C00003	HMDB00902	5893	1.27	0.78	0.7
3907			nicotinamide adenine dinucleotide reduced (NADH)	LC/MS neg	31475	C00004	HMDB01487	439153	0.45	0.41	0.69
3919			trigonelline (N'-methylnicotinate)	LC/MS pos early	32401	C01004	HMDB00875	5570	1.45	1.21	1
3923			adenosine 5'-diphosphoribose (ADP-ribose)	LC/MS neg	558	C00301	HMDB01178	192	1.21	0.68	0.57
3927		Riboflavin Metabolism	riboflavin (Vitamin B2)	LC/MS pos early	1827	C00255	HMDB00244	493570	1.11	0.58	0.66
3928			flavin adenine dinucleotide (FAD)	LC/MS neg	2134	C00016	HMDB01248	643975	0.66	0.62	0.86
3929			flavin mononucleotide (FMN)	LC/MS neg	15797	C00061	HMDB01520	710	0.61	0.5	0.63
3930		Pantothenate and CoA Metabolism	pantoate	LC/MS neg	63061	C00522		439251	1.17	0.66	0.61
3931			pantothenate	LC/MS neg	1508	C00864	HMDB00210	6613	0.75	0.71	0.71
3933			pantetheine	LC/MS neg	57555	C00831		439322	0.24	0.24	0.31
3934			phosphopantetheine	LC/MS neg	15504	C01134	HMDB01416	987	0.35	0.26	0.38
3935			3'-dephosphocoenzyme A	LC/MS neg	18289	C00882	HMDB01373	444485	0.12	0.11	0.21
3936			3'-dephospho-acetyl-CoA	LC/MS neg	54675			193680	0.31	0.15	0.17
3937			coenzyme A	LC/MS neg	46322	C00010	HMDB01423	317	0.08	0.11	0.09
3946		Ascorbate and Aldarate Metabolism	threonate	LC/MS polar	27738	C01620	HMDB00943	151152	1.32	1.04	1.08
3950			gulonate*	LC/MS polar	46957	C00257	HMDB03290	152304	0.68	0.54	0.69
3976		Biotin Metabolism	biotin	LC/MS pos early	568	C00120	HMDB00030	171548	4.15	4.65	2.14
3977			biocytin	LC/MS pos early	42971			7098660;83814	0.84	0.93	1.04
3985		Pterin Metabolism	pterin	LC/MS neg	43023	C00715	HMDB00802	73000	1.52	1.08	1.08
3990		Hemoglobin and Porphyrin Metabolism	5-aminolevulinate	LC/MS pos early	2290	C00430	HMDB01149	137	0.66	0.58	0.39
3997			bilirubin (Z,Z)	LC/MS pos late	43807	C00486	HMDB00054	5280352	0.41	0.21	0.15
4000			biliverdin	LC/MS pos late	2137	C00500	HMDB01008	5353439	3.6	2.14	1.87
4009		Thiamine Metabolism	thiamin (Vitamin B1)	LC/MS pos early	5341	C00378	HMDB00235	1130	0.69	0.55	0.52
4010			thiamin monophosphate	LC/MS pos early	15798	C01081	HMDB02666	3382778	0.1	0.09	0.12
4011			thiamin diphosphate	LC/MS neg	35670	C00068	HMDB01372	1132	1.16	0.72	0.75
4012			5-(2-Hydroxyethyl)-4-methylthiazole	LC/MS pos early	27673	C04294		1136	1.27	1.05	0.84
4013			hydroxymethylpyrimidine	LC/MS pos early	57565	C01279		777	1.42	1.19	1.01
4031		Vitamin B6 Metabolism	pyridoxine (Vitamin B6)	LC/MS pos early	608	C00314	HMDB02075	1054	1.09	0.91	0.71
4033			pyridoxamine	LC/MS pos early	2150	C00534	HMDB01431	1052	0.71	0.69	0.88
4034			pyridoxamine phosphate	LC/MS pos early	3138	C00647	HMDB01555	1053	0.77	0.59	0.69
4035			pyridoxal phosphate	LC/MS neg	5331	C00018	HMDB01491	1051	0.69	0.43	0.63
4036			pyridoxal	LC/MS pos early	1651	C00250	HMDB01545	1050	0.35	0.42	0.56
4037			pyridoxate	LC/MS neg	31555	C00847	HMDB00017	6723	1.16	0.65	0.78
4039	Xenobiotics	Benzoate Metabolism	hippurate	LC/MS neg	15753	C01586	HMDB00714	464	1.41	0.9	0.91
4053			benzoate	LC/MS neg	15778	C00180	HMDB01870	243	1.58	0.76	0.82
4063			4-hydroxybenzoate	LC/MS neg	21133	C00156	HMDB00500	135	1.48	0.9	1.41
4116			p-cresol sulfate	LC/MS neg	36103		HMDB11635	4615423	1.61	0.83	0.82
4131			3-(4-hydroxyphenyl)propionate	LC/MS neg	39587	C01744	HMDB02199	10394	1.43	0.94	0.78
4132			3-phenylpropionate (hydrocinnamate)	LC/MS neg	15749	C05629	HMDB00764	107	1.31	0.82	0.78
4168		Food Component/Plant	2-piperidinone	LC/MS pos early	43400		HMDB11749	12665	1.08	0.9	0.96
4223			1-methyl-beta-carboline-3-carboxylic acid	LC/MS neg	43449			5406157	1.47	1.02	0.96
4242			levulinate (4-oxovalerate)	LC/MS neg	22177		HMDB00720	11579	1.23	0.66	0.8
4247			vanillate	LC/MS neg	35639	C06672	HMDB00484	8468	1.58	0.93	0.86
4255			2,3-dihydroxyisovalerate	LC/MS polar	38276	C04039	HMDB12141	677	2.2	0.39	0.64
4263			2-isopropylmalate	LC/MS polar	15667	C02504	HMDB00402	77	0.72	0.24	0.43
4268			3-formylindole	LC/MS neg	62863	C08493	HMDB29737	10256	1.34	1.01	0.89
4290			gluconate	LC/MS polar	587	C00257	HMDB00625	10690	0.19	0.34	0.14
4313			beta-guanidinopropanoate	LC/MS pos early	35101	C03065	HMDB13222	67701	0.64	0.64	0.76
4337			cinnamoylglycine	LC/MS neg	38637		HMDB11621	709625	1.75	1.19	0.93
4362			dihydroferulate	LC/MS neg	40481			14340	1.74	0.99	0.73
4372			ergothioneine	LC/MS pos early	37459	C05570	HMDB03045	3032311	0.79	0.65	0.6
4374			erythritol	LC/MS polar	20699	C00503	HMDB02994	222285	0.92	0.99	0.86
4380			ferulic acid 4-sulfate	LC/MS neg	47114		HMDB29200	6305574	1.97	1.76	2.03
4383			quinate	LC/MS polar	18335	C00296	HMDB03072	6508	0.78	0.58	0.83
4409			histidinol	LC/MS pos early	15316	C00860	HMDB03431	165271	1.49	1.26	1.06
4410			homocitrate	LC/MS polar	39601	C01251	HMDB03518	439459	2.02	2.53	0.66
4414			indolin-2-one	LC/MS pos early	43374	C12312		321710	0.85	0.58	0.71
4433			mannonate*	LC/MS polar	62864			3246006	1.13	0.9	0.89
4522			stachydrine	LC/MS pos early	34384	C10172	HMDB04827	115244	0.08	0.06	0.06
4540			trihydroxybutane	LC/MS neg	38636			20497	1.48	1.2	1.08
4546			ethyl alpha-glucopyranoside	LC/MS neg	63152			428040	0.49	0.47	0.47
4563			harmane	LC/MS pos early	27536	C09209	HMDB35196	5281404	1.08	0.65	0.61
4575			pyrraline	LC/MS neg	48428		HMDB33143	122228	0.95	0.84	0.92
4584			2-keto-3-deoxy-gluconate	LC/MS polar	48141	C00204	HMDB01353	161227	1.31	1.11	0.94
4660			N-carboxymethylalanine	LC/MS pos early	63155			2764308	0.81	0.58	0.97
4661			(S)-a-amino-omega-caprolactam	LC/MS pos early	63339	C05328		439823	1.2	0.92	0.79
4663			2-dimethylaminoethanol	LC/MS pos early	42562	D07777	HMDB32231		1.56	1.41	0.8
4664			3-indoleglyoxylic acid	LC/MS neg	63583			73863	1.41	0.94	0.87
4671		Bacterial/Fungal	3-deoxyoctulosonate	LC/MS polar	43805			4636210	0.61	0.27	0.33
5108		Drug - Topical Agents	salicylate	LC/MS neg	1515	C00805	HMDB01895	338	1.55	1.05	0.95
5136		Drug - Other	S-carboxymethyl-L-cysteine	LC/MS pos early	47897	C03727	HMDB29415	1080	1.14	1.1	1.02
5182		Chemical	1,3-propanediol	LC/MS pos early	45434	C02457		10442	1.48	0.81	0.55
5187			sulfate*	LC/MS neg	46960	C00059	HMDB01448	1118	1.35	0.85	1.02
5190			O-sulfo-L-tyrosine	LC/MS neg	45413			514186	1.57	1.12	0.98
5295			succinimide	LC/MS polar	41888	C07273		11439	0.77	0.39	0.44
5328			thioproline	LC/MS pos early	53231			93176	0.53	0.33	0.59
5329			p-toluic acid	LC/MS neg	37499	C01454	HMDB29635	7470	1.82	1.05	1
5336			2,2'-Methylenebis(6-tert-butyl-p-cresol)	LC/MS polar	62885			8398	1	0.71	0.61
5352			4-quinolinecarboxylic acid	LC/MS neg	63767	C06414		10243	2.41	1.15	1
5426	Partially Characterized Molecules	Partially Characterized Molecules	pentose acid*	LC/MS polar	63264				1.08	0.89	0.79
5432			branched-chain, straight-chain, or cyclopropyl 10:1 fatty acid (1)*	LC/MS neg	63615				1.21	1.25	0.27
5434			branched-chain, straight-chain, or cyclopropyl 12:1 fatty acid*	LC/MS neg	63683				7.14	2.26	1.12
